# Supplementary material for: TAF4, a subunit of transcription factor II D, directs promoter occupancy of nuclear receptor HNF4A during post-natal hepatocyte differentiation
Source: eLife. 2014 Sep 10;3:e03613. doi: 10.7554/eLife.03613 (PMC4359380; doi:10.7554/eLife.03613)
Supplement: Supplementary file 1. — Excel table of RNA-seq data. Pages 1 and 2 show the genes down- and up-regulated in TAF4 mutant liver respectively. Page 3 indicates genes with associated HNF4A occupied sites in E18.5 liver and page 4 the ontology terms associated with these genes. Page 5 lists genes that show loss of HNF4A occupancy and down-regulation in TAF4 mutant liver and page 6 the ontology terms associated with these genes (Supplementary file 1). DOI: http://dx.doi.org/10.7554/eLife.03613.019 [file elife03613s001.xlsx]

## Sheet: Down-regulated
Ensembl gene id	Gene name	Description	WT. 1	WT. 2	KO.1	KO. 2	KO/WT	log2(KO/WT)	p-value	Adj_p-value
ENSMUSG00000037263	1700055N04Rik	RIKEN cDNA 1700055N04 gene	9.68664	5.52406	0	0	0	-100000	0.000678826	0.0110859
ENSMUSG00000086771	1700080G11Rik	RIKEN cDNA 1700080G11 gene	53.5616	21.3814	0	0	0	-100000	0.00131945	0.01919
ENSMUSG00000022347	A1bg	alpha-1-B glycoprotein	11.1021	6.57478	0	0	0	-100000	2.34746e-05	0.000578411
ENSMUSG00000029811	Abp1	amiloride binding protein 1 (amine oxidase, copper-containing)	8.63482	6.4015	0	0	0	-100000	1.50749e-06	4.77359e-05
ENSMUSG00000074052	BC048644	cDNA sequence BC048644	3.44438	2.94637	0	0	0	-100000	0.00843423	0.0823285
ENSMUSG00000045291	E330021D16Rik	RIKEN cDNA E330021D16 gene	12.5553	28.64	0	0	0	-100000	0.000145586	0.002868
ENSMUSG00000087404	Gm11752	predicted gene 11752	42.7373	18.279	0	0	0	-100000	0.000698602	0.0113545
ENSMUSG00000084819	Gm11967	predicted gene 11967	32.4345	11.098	0	0	0	-100000	0.00907934	0.0869199
ENSMUSG00000082271	Gm12217	predicted gene 12217	24.6055	11.4807	0	0	0	-100000	0.000370918	0.00653582
ENSMUSG00000085132	Gm12265	predicted gene 12265	103.125	54.0671	0	0	0	-100000	1.17994e-06	3.82257e-05
ENSMUSG00000085404	Gm12909	predicted gene 12909	50.2212	55.8479	0	0	0	-100000	7.15718e-10	3.92839e-08
ENSMUSG00000087273	Gm13203	predicted gene 13203	83.8308	48.6604	0	0	0	-100000	3.74312e-08	1.58459e-06
ENSMUSG00000082586	Gm15436	predicted gene 15436	40.7317	30.9711	0	0	0	-100000	0.000260101	0.00480254
ENSMUSG00000085541	Gm16010	predicted gene 16010	11.4364	9.78287	0	0	0	-100000	1.91556e-08	8.4781e-07
ENSMUSG00000061769	Klra6	killer cell lectin-like receptor, subfamily A, member 6	5.58014	9.54665	0	0	0	-100000	0.00318404	0.0390057
ENSMUSG00000037390	Muc3	mucin 3, intestinal	9.66242	7.2322	0	0	0	-100000	0.000689763	0.0112338
ENSMUSG00000026413	Pkp1	plakophilin 1	3.60503	2.20271	0	0	0	-100000	0.00302699	0.0375832
ENSMUSG00000018868	Pnpla5	patatin-like phospholipase domain containing 5	4.59521	4.71697	0	0	0	-100000	0.00512982	0.0568878
ENSMUSG00000025946	Pth2r	parathyroid hormone 2 receptor	19.4288	18.3691	0	0	0	-100000	8.32887e-09	3.91457e-07
ENSMUSG00000061100	Retnla	resistin like alpha	52.0688	24.4972	0	0	0	-100000	6.79364e-05	0.00149223
ENSMUSG00000057465	Saa2	serum amyloid A 2	242.461	137.542	0	0	0	-100000	2.23287e-10	1.32947e-08
ENSMUSG00000028236	Sdr16c5	short chain dehydrogenase/reductase family 16C, member 5	4.59928	10.4914	0	0	0	-100000	0.00531066	0.0584858
ENSMUSG00000070530	Wfdc16	WAP four-disulfide core domain 16	12.5553	4.77333	0	0	0	-100000	0.00519818	0.0574592
ENSMUSG00000078799	Sult2a5	sulfotransferase family 2A, dehydroepiandrosterone (DHEA)-preferring, member 5	3129.6	1595.39	2.74114	0	0.000578248	-10.756	1.49168e-11	1.0925e-09
ENSMUSG00000067144	Slc22a7	solute carrier family 22 (organic anion transporter), member 7	4400.63	2370.89	3.21234	2.57824	0.000852066	-10.1967	1.66984e-13	1.5102e-11
ENSMUSG00000066362	Rps13-ps1	ribosomal protein S13, pseudogene 1	719.738	404.284	1.066	0	0.000945307	-10.0469	2.05399e-11	1.45523e-09
ENSMUSG00000053168	9030619P08Rik	RIKEN cDNA 9030619P08 gene	3642.97	2089.43	3.13822	3.02251	0.00107083	-9.86705	3.93684e-15	4.23406e-13
ENSMUSG00000063779	Chi3l4	chitinase 3-like 4	313.01	141.587	0.565541	0	0.00123998	-9.65547	7.93449e-07	2.70067e-05
ENSMUSG00000058207	Serpina3k	serine (or cysteine) peptidase inhibitor, clade A, member 3K	6879.73	4655.52	11.6938	3.64992	0.00132564	-9.5591	3.69179e-28	1.00165e-25
ENSMUSG00000033634	Cml2	camello-like 2	910.722	1056.21	1.46482	1.56757	0.00153625	-9.34637	5.03765e-84	1.20279e-79
ENSMUSG00000070368	Prok1	prokineticin 1	673.134	662.662	0	2.08315	0.00155335	-9.3304	1.34592e-40	6.8373e-38
ENSMUSG00000049152	Ugt3a2	UDP glycosyltransferases 3 family, polypeptide A2	6952.25	5458.53	12.4667	7.23831	0.00158222	-9.30383	2.34914e-67	8.0126e-64
ENSMUSG00000030364	Clec2h	C-type lectin domain family 2, member h	281.82	156.605	0.7462	0	0.00169648	-9.20324	2.77128e-11	1.90683e-09
ENSMUSG00000072664	Ugt3a1	UDP glycosyltransferases 3 family, polypeptide A1	3659.34	3354.29	7.53173	8.06003	0.00221514	-8.81839	6.62104e-70	2.63473e-66
ENSMUSG00000045776	Lrtm1	leucine-rich repeats and transmembrane domains 1	90.416	104.277	0.4405	0	0.00225547	-8.79235	1.60671e-56	2.55746e-53
ENSMUSG00000041798	Gck	glucokinase	644.968	253.699	0.777329	1.6637	0.0027059	-8.52967	9.2094e-06	0.000249584
ENSMUSG00000031725	Ces1f	carboxylesterase 1F	875.474	781.863	1.90014	3.05012	0.00297599	-8.39242	1.19218e-48	9.48819e-46
ENSMUSG00000057346	Apol9b	apolipoprotein L 9b	254.117	177.449	0.715874	0.574565	0.0029795	-8.39071	2.31008e-22	4.37742e-20
ENSMUSG00000025317	Car5a	carbonic anhydrase 5a, mitochondrial	952.173	858.192	2.51793	3.03136	0.00305429	-8.35495	3.12218e-57	5.59661e-54
ENSMUSG00000040660	Cyp2b9	cytochrome P450, family 2, subfamily b, polypeptide 9	5415.81	6671.57	18.6152	21.1468	0.00327795	-8.25299	3.36919e-80	4.02214e-76
ENSMUSG00000030236	Slco1b2	solute carrier organic anion transporter family, member 1b2	18321.8	22847.1	73.7969	61.9221	0.00328521	-8.2498	3.22239e-73	1.92344e-69
ENSMUSG00000070811	Sult2a2	sulfotransferase family 2A, dehydroepiandrosterone (DHEA)-preferring, member 2	13207	5195.83	53.6539	8.14704	0.00334683	-8.22299	1.77198e-05	0.000451524
ENSMUSG00000052974	Cyp2f2	cytochrome P450, family 2, subfamily f, polypeptide 2	7521.6	5884.68	34.0988	14.0177	0.00357685	-8.1271	3.00244e-55	4.12848e-52
ENSMUSG00000039809	Gabbr2	gamma-aminobutyric acid (GABA) B receptor, 2	203.266	313.151	1.04696	0.840295	0.003642	-8.10105	2.42346e-18	3.28764e-16
ENSMUSG00000003477	Inmt	indolethylamine N-methyltransferase	8923.07	2766.27	20.4569	22.4679	0.00365844	-8.09455	0.000427795	0.00739756
ENSMUSG00000030762	Aqp8	aquaporin 8	3384.47	2018.03	8.93747	12.3902	0.0039332	-7.99008	4.13589e-14	3.99792e-12
ENSMUSG00000041468	Gpr12	G-protein coupled receptor 12	30.9101	23.7429	0.217692	0	0.00397046	-7.97648	5.28094e-16	6.12076e-14
ENSMUSG00000034785	Dio1	deiodinase, iodothyronine, type I	14126.5	10442.8	58.548	42.8447	0.00411226	-7.92585	9.38849e-37	3.93263e-34
ENSMUSG00000025396	Hsd17b6	hydroxysteroid (17-beta) dehydrogenase 6	4191.88	2350.67	18.5263	8.67379	0.00414292	-7.91514	2.81282e-11	1.92432e-09
ENSMUSG00000023829	Slc22a1	solute carrier family 22 (organic cation transporter), member 1	4520.67	3012.15	18.5914	14.2728	0.0043473	-7.84566	3.96639e-21	6.76439e-19
ENSMUSG00000052117	D630039A03Rik	RIKEN cDNA D630039A03 gene	251.408	159.529	0.949229	0.914229	0.00451832	-7.79	1.26014e-15	1.4192e-13
ENSMUSG00000074115	Saa1	serum amyloid A 1	560.984	314.779	2.66412	1.42549	0.00465337	-7.74751	8.36806e-10	4.53052e-08
ENSMUSG00000074375	Sult2a3	sulfotransferase family 2A, dehydroepiandrosterone (DHEA)-preferring, member 3	290.757	315.832	2.12357	0.852196	0.00488927	-7.67616	8.76351e-39	4.0238e-36
ENSMUSG00000074639	BC089597	cDNA sequence BC089597	3332.78	2296.1	17.4133	11.5899	0.00513443	-7.60558	2.19791e-23	4.60326e-21
ENSMUSG00000057074	Ces1g	carboxylesterase 1G	2583.03	1225.24	8.77441	11.5568	0.0053189	-7.55466	2.99034e-07	1.09842e-05
ENSMUSG00000002588	Pon1	paraoxonase 1	45078.6	38998.5	295.043	177.985	0.00560663	-7.47865	2.00405e-75	1.59495e-71
ENSMUSG00000046213	Cym	chymosin	79.3544	38.7891	0	0.697753	0.00588212	-7.40945	3.37004e-06	9.99648e-05
ENSMUSG00000052520	Cyp2j5	cytochrome P450, family 2, subfamily j, polypeptide 5	4201.19	3747.1	22.2237	25.3762	0.00596725	-7.38872	5.85359e-73	2.79521e-69
ENSMUSG00000059908	Mug1	murinoglobulin 1	660.452	1336.93	7.4541	4.66449	0.00604701	-7.36956	9.5974e-08	3.85122e-06
ENSMUSG00000078798	Sult2a1	sulfotransferase family 2A, dehydroepiandrosterone (DHEA)-preferring, member 1	19098.6	9787.97	143.13	35.4767	0.00616197	-7.34239	4.3914e-08	1.84269e-06
ENSMUSG00000067656	Slc22a27	solute carrier family 22, member 27	1617.71	1104.94	9.00023	9.23021	0.0066717	-7.22773	2.69188e-21	4.69134e-19
ENSMUSG00000016194	Hsd11b1	hydroxysteroid 11-beta dehydrogenase 1	31530.2	24156.2	206.394	170.777	0.00674912	-7.21109	3.48419e-42	1.89065e-39
ENSMUSG00000030131	Mug2	murinoglobulin 2	104.841	163.539	1.06412	0.759175	0.00677062	-7.2065	2.12254e-15	2.33538e-13
ENSMUSG00000090145	Ugt1a6b	UDP glucuronosyltransferase 1 family, polypeptide A6B	108.761	147.453	1.41634	0.37892	0.00698401	-7.16173	4.51276e-26	1.05634e-23
ENSMUSG00000047728	BC025446	cDNA sequence BC025446	4080.41	2671.66	26.6442	22.2636	0.00721752	-7.11428	2.27035e-17	2.853e-15
ENSMUSG00000071204	Gm10319	predicted pseudogene 10319	19.8056	44.7751	0.4882	0	0.0075367	-7.05185	0.000159962	0.00312286
ENSMUSG00000017688	Hnf4g	hepatocyte nuclear factor 4, gamma	32.783	46.3569	0.230883	0.370616	0.00757331	-7.04486	8.32053e-18	1.09758e-15
ENSMUSG00000029445	Hpd	4-hydroxyphenylpyruvic acid dioxygenase	52469.2	45475	657.559	101.704	0.00772661	-7.01595	7.6776e-67	2.29138e-63
ENSMUSG00000000673	Haao	3-hydroxyanthranilate 3,4-dioxygenase	6573.97	4615.38	55.3971	31.7586	0.00776199	-7.00936	1.87763e-23	3.96727e-21
ENSMUSG00000084403	Rps15a-ps8	ribosomal protein S15A, pseudogene 8	1279.28	822.455	5.55311	11.1424	0.00791399	-6.98138	1.08319e-14	1.09585e-12
ENSMUSG00000024411	Aqp4	aquaporin 4	109.672	161.949	1.16291	1.01821	0.0080023	-6.96537	7.8587e-19	1.11687e-16
ENSMUSG00000047492	Inhbe	inhibin beta E	1542.27	1238.82	13.5889	8.88679	0.00805339	-6.95619	3.11244e-55	4.12848e-52
ENSMUSG00000040413	Timd2	T cell immunoglobulin and mucin domain containing 2	2948.23	2576.16	24.1814	21.4728	0.0082349	-6.92403	3.30059e-65	8.75609e-62
ENSMUSG00000022445	Cyp2d26	cytochrome P450, family 2, subfamily d, polypeptide 26	32247.3	22690.9	233.522	222.814	0.00827658	-6.91675	6.41795e-24	1.39305e-21
ENSMUSG00000039196	Orm1	orosomucoid 1	516.274	915.906	4.15946	7.78963	0.00831356	-6.91032	6.12403e-10	3.38466e-08
ENSMUSG00000024503	Spink3	serine peptidase inhibitor, Kazal type 3	1431.42	2221.7	19.097	14.3056	0.00911241	-6.77795	5.71958e-15	5.98951e-13
ENSMUSG00000024354	Slc23a1	solute carrier family 23 (nucleobase transporters), member 1	1549.24	1988.41	16.2011	16.166	0.00911734	-6.77717	5.23795e-43	2.9084e-40
ENSMUSG00000037686	Aspg	asparaginase homolog (S, cerevisiae)	773.87	511.352	6.09633	5.68214	0.00913164	-6.77491	8.69433e-17	1.05374e-14
ENSMUSG00000044748	Defb1	defensin beta 1	3567.2	2547.45	46.8257	10.8792	0.00940555	-6.73227	1.55538e-23	3.34562e-21
ENSMUSG00000026224	4933407L21Rik	RIKEN cDNA 4933407L21 gene	33.9884	33.9199	0.651624	0	0.00956544	-6.70795	1.08086e-07	4.27971e-06
ENSMUSG00000060317	Acnat2	acyl-coenzyme A amino acid N-acyltransferase 2	1289.84	1571.4	22.6587	4.84961	0.00958286	-6.70533	6.99925e-54	7.5961e-51
ENSMUSG00000049685	Cyp2g1	cytochrome P450, family 2, subfamily g, polypeptide 1	84.8584	81.9322	1.15977	0.46542	0.009711	-6.68616	2.52483e-25	5.8527e-23
ENSMUSG00000021336	Slc17a4	solute carrier family 17 (sodium phosphate), member 4	988.655	875.356	10.0717	8.42045	0.0098857	-6.66044	6.8493e-58	1.36278e-54
ENSMUSG00000022613	Miox	myo-inositol oxygenase	737.303	725.643	8.20772	6.58757	0.010078	-6.63265	4.52911e-44	2.84571e-41
ENSMUSG00000081988	Gm15746	predicted gene 15746	50.0256	49.2763	1.04628	0	0.0105031	-6.57304	5.04125e-12	3.8953e-10
ENSMUSG00000036083	Slc17a3	solute carrier family 17 (sodium phosphate), member 3	790.138	833.982	9.66302	7.61459	0.0106011	-6.55964	3.28164e-57	5.59661e-54
ENSMUSG00000021210	Akr1c6	aldo-keto reductase family 1, member C6	51833	35321.6	496.951	456.508	0.0109007	-6.51944	7.08759e-19	1.01331e-16
ENSMUSG00000060407	Cyp2a12	cytochrome P450, family 2, subfamily a, polypeptide 12	11527	7352.82	128.801	79.1596	0.0109762	-6.50947	5.77609e-14	5.49442e-12
ENSMUSG00000034456	Uroc1	urocanase domain containing 1	4954.03	5178.78	67.8367	46.4877	0.0112436	-6.47475	1.60226e-61	3.82554e-58
ENSMUSG00000091867	Cyp2a22	cytochrome P450, family 2, subfamily a, polypeptide 22	3054.97	1293.47	22.929	26.7328	0.0113784	-6.45756	5.98579e-05	0.00133194
ENSMUSG00000023122	Sult1c2	sulfotransferase family, cytosolic, 1C, member 2	996.018	890.244	17.4625	4.67185	0.0116954	-6.41791	6.80221e-52	6.24652e-49
ENSMUSG00000020722	Cacng1	calcium channel, voltage-dependent, gamma subunit 1	88.5003	28.789	0	1.38098	0.0117259	-6.41415	0.00272086	0.0343721
ENSMUSG00000054827	Cyp2c50	cytochrome P450, family 2, subfamily c, polypeptide 50	740.624	575.478	14.8252	1.9038	0.0126693	-6.30252	4.07919e-35	1.65076e-32
ENSMUSG00000086437	Gm13021	predicted gene 13021	294.691	242.57	3.8376	3.08008	0.0128304	-6.28429	1.0563e-15	1.19527e-13
ENSMUSG00000026614	Slc30a10	solute carrier family 30, member 10	362.271	437.454	4.05065	6.35438	0.012964	-6.26934	3.64659e-55	4.58242e-52
ENSMUSG00000022215	Fitm1	fat storage-inducing transmembrane protein 1	382.386	202.031	4.99006	2.67004	0.0130611	-6.25858	5.43532e-07	1.91407e-05
ENSMUSG00000057068	Fam47e	family with sequence similarity 47, member E	404.783	330.276	8.59622	1.1499	0.0132156	-6.24162	3.44256e-31	1.08151e-28
ENSMUSG00000075044	Slc22a29	solute carrier family 22, member 29	372.905	262.103	6.10032	2.3315	0.0132329	-6.23973	6.2807e-19	9.25666e-17
ENSMUSG00000069922	Ces3a	carboxylesterase 3A	1660.33	1515.86	22.5387	20.0513	0.0133618	-6.22574	9.29187e-55	1.10926e-51
ENSMUSG00000086868	Gm15883	predicted gene 15883	84.752	81.9543	1.27163	1.02062	0.0137021	-6.18946	4.8149e-23	9.82568e-21
ENSMUSG00000059434	Gckr	glucokinase regulatory protein	3613.58	3240.04	56.8773	38.1489	0.0138169	-6.17742	5.01329e-56	7.48108e-53
ENSMUSG00000054757	Akr1c20	aldo-keto reductase family 1, member C20	7750.24	5561.08	96.5579	90.5287	0.0140044	-6.15798	8.60969e-23	1.69888e-20
ENSMUSG00000092545	Gm20319	predicted gene, 20319	1720.89	1233.29	32.7721	9.56476	0.0142828	-6.12958	1.14487e-20	1.87226e-18
ENSMUSG00000053303	Slc22a26	solute carrier family 22 (organic cation transporter), member 26	203.695	119.45	2.21051	2.48383	0.0144741	-6.11038	2.37488e-09	1.20901e-07
ENSMUSG00000086628	Gm16157	predicted gene 16157	398.849	237.343	3.98958	5.33677	0.0146058	-6.09732	1.38835e-09	7.30139e-08
ENSMUSG00000056973	Ces1d	carboxylesterase 1D	70347.4	41727.5	730.456	929.45	0.0147564	-6.08252	3.56284e-10	2.07986e-08
ENSMUSG00000053862	Ostb	organic solute transporter beta	711.433	521.241	16.5143	1.76726	0.0147822	-6.07999	3.54485e-21	6.08898e-19
ENSMUSG00000029597	Sds	serine dehydratase	3119.94	2748.75	60.1735	27.5975	0.0149048	-6.06808	6.79528e-48	5.23368e-45
ENSMUSG00000005268	Prlr	prolactin receptor	6450.29	7053.45	134.37	67.9674	0.014933	-6.06536	1.04059e-54	1.1831e-51
ENSMUSG00000038704	Aspdh	aspartate dehydrogenase domain containing	4590.18	3104.64	79.8452	35.8438	0.0149828	-6.06055	4.71448e-16	5.49087e-14
ENSMUSG00000032080	Apoa4	apolipoprotein A-IV	3324.73	6221.48	72.8192	71.2746	0.0150426	-6.05481	1.27281e-07	4.94944e-06
ENSMUSG00000030382	Slc27a5	solute carrier family 27 (fatty acid transporter), member 5	39534.4	24761.4	740.746	250.704	0.0153674	-6.02398	1.28455e-11	9.49533e-10
ENSMUSG00000061540	Orm2	orosomucoid 2	60.2655	53.2703	0.693243	1.1128	0.0158493	-5.97944	1.51441e-10	9.31907e-09
ENSMUSG00000030470	Csrp3	cysteine and glycine-rich protein 3	243.473	96.8018	3.5502	1.89961	0.0159589	-5.9695	0.000692498	0.0112707
ENSMUSG00000027559	Car3	carbonic anhydrase 3	5450.55	4749.08	100.536	64.0951	0.0160849	-5.95815	2.54598e-53	2.53283e-50
ENSMUSG00000042248	Cyp2c37	cytochrome P450, family 2, subfamily c, polypeptide 37	6342.66	3955.12	130.781	37.8256	0.0163175	-5.93744	3.6465e-11	2.45943e-09
ENSMUSG00000081303	Gm16011	predicted gene 16011	5.26361	7.00399	0.201827	0	0.016401	-5.93007	8.8469e-05	0.00187592
ENSMUSG00000068246	Apol9a	apolipoprotein L 9a	48.3684	40.513	0.347743	1.1164	0.0164109	-5.9292	1.42436e-14	1.417e-12
ENSMUSG00000035686	Thrsp	thyroid hormone responsive SPOT14 homolog (Rattus)	427.923	129.317	7.1523	2.02605	0.0164135	-5.92897	0.00741837	0.0753706
ENSMUSG00000024292	Cyp4f14	cytochrome P450, family 4, subfamily f, polypeptide 14	550.932	380.158	13.1456	2.3446	0.0165813	-5.9143	2.29118e-16	2.70813e-14
ENSMUSG00000041567	Serpina12	serine (or cysteine) peptidase inhibitor, clade A (alpha-1 antiproteinase, antitrypsin), member 12	14.345	7.94002	0.1456	0.233719	0.0169579	-5.8819	2.27359e-06	6.96845e-05
ENSMUSG00000005677	Nr1i3	nuclear receptor subfamily 1, group I, member 3	3298.69	3406.63	72.1924	42.0843	0.0169843	-5.87966	2.10727e-51	1.86345e-48
ENSMUSG00000037780	Mbl1	mannose-binding lectin (protein A) 1	7821.4	5826.26	128.641	112.124	0.0175787	-5.83003	2.15842e-26	5.20549e-24
ENSMUSG00000035780	Ugt2a3	UDP glucuronosyltransferase 2 family, polypeptide A3	328.727	324.604	6.34463	5.29594	0.0177548	-5.81564	1.56762e-40	7.73485e-38
ENSMUSG00000000301	Pemt	phosphatidylethanolamine N-methyltransferase	52951.2	32394.8	921.201	604.296	0.0178111	-5.81108	1.98536e-10	1.19703e-08
ENSMUSG00000025347	Mettl7b	methyltransferase like 7B	17048	10765.9	359.052	138.466	0.0178259	-5.80989	1.74283e-11	1.26096e-09
ENSMUSG00000032081	Apoc3	apolipoprotein C-III	40745.5	27282.7	861.597	357.654	0.0178611	-5.80704	1.30616e-14	1.31034e-12
ENSMUSG00000079012	Serpina3m	serine (or cysteine) peptidase inhibitor, clade A, member 3M	16577.7	12706.5	431.495	94.6403	0.0179067	-5.80336	2.30259e-30	6.72544e-28
ENSMUSG00000038641	Akr1d1	aldo-keto reductase family 1, member D1	28237.3	29366.1	635.654	413.547	0.0181514	-5.78377	6.27802e-52	5.99576e-49
ENSMUSG00000026542	Apcs	serum amyloid P-component	24745	20162	535.624	317.596	0.0189338	-5.72289	1.20688e-50	1.02913e-47
ENSMUSG00000040017	Saa4	serum amyloid A 4	2632.36	2481.76	68.2578	29.5321	0.0190567	-5.71356	6.244e-49	5.14075e-46
ENSMUSG00000032079	Apoa5	apolipoprotein A-V	11996.9	7452	278.482	110.773	0.0199453	-5.64781	1.91201e-10	1.15866e-08
ENSMUSG00000051716	Apon	apolipoprotein N	6101.38	3885.8	153.077	47.9716	0.0200621	-5.63938	2.46405e-11	1.71521e-09
ENSMUSG00000047230	Cldn2	claudin 2	4730.37	5672.76	140.898	74.2483	0.0206109	-5.60045	1.48316e-47	1.10662e-44
ENSMUSG00000035498	Cdcp1	CUB domain containing protein 1	156.368	200.882	4.7094	3.14983	0.021924	-5.51135	8.24862e-31	2.49296e-28
ENSMUSG00000047109	Cldn14	claudin 14	812.862	569.1	14.8533	15.668	0.0220058	-5.50597	5.90325e-17	7.26526e-15
ENSMUSG00000021135	Slc10a1	solute carrier family 10 (sodium/bile acid cotransporter family), member 1	10848.7	10036.7	345.338	150.95	0.0236817	-5.40009	2.47614e-46	1.73883e-43
ENSMUSG00000042041	2010003K11Rik	RIKEN cDNA 2010003K11 gene	632.098	682.455	18.908	12.5847	0.0238744	-5.38839	1.1399e-37	5.04003e-35
ENSMUSG00000026405	C4bp	complement component 4 binding protein	12264.5	10565.7	338.504	210.914	0.0239818	-5.38191	2.59148e-46	1.76783e-43
ENSMUSG00000038751	Ptk6	PTK6 protein tyrosine kinase 6	20.6793	21.6605	1.01948	0	0.0240028	-5.38065	6.49992e-14	6.10992e-12
ENSMUSG00000023070	Rgn	regucalcin	26008.3	20625.3	674.338	459.923	0.0242377	-5.36661	6.02794e-37	2.61678e-34
ENSMUSG00000040505	Abcg5	ATP-binding cassette, sub-family G (WHITE), member 5	3544.79	2841.64	124.388	31.0297	0.0242544	-5.36561	5.74021e-38	2.58591e-35
ENSMUSG00000024254	Abcg8	ATP-binding cassette, sub-family G (WHITE), member 8	1998.45	1773.47	69.8554	22.1409	0.0243079	-5.36243	7.61268e-44	4.66052e-41
ENSMUSG00000074345	Tnfaip8l3	tumor necrosis factor, alpha-induced protein 8-like 3	11.1954	7.78106	0.482934	0	0.0253675	-5.30087	2.47941e-05	0.000607164
ENSMUSG00000043681	Fam25c	family with sequence similarity 25, member C	2445.95	933.536	56.6234	29.5929	0.0254208	-5.29785	0.00220249	0.0292962
ENSMUSG00000089960	Ugt1a1	UDP glucuronosyltransferase 1 family, polypeptide A1	1993.67	2115	79.9615	25.9813	0.0256993	-5.28213	3.97581e-43	2.26015e-40
ENSMUSG00000036027	1810046K07Rik	RIKEN cDNA 1810046K07 gene	69.6924	50.5219	2.44581	0.654342	0.0257018	-5.28199	6.40473e-14	6.04424e-12
ENSMUSG00000036216	Leap2	liver-expressed antimicrobial peptide 2	5400.63	3466.08	158.852	71.4625	0.0258853	-5.27172	8.42668e-11	5.36521e-09
ENSMUSG00000028011	Tdo2	tryptophan 2,3-dioxygenase	33966.7	24664.1	1221.2	310.843	0.0260427	-5.26298	6.70146e-19	9.75635e-17
ENSMUSG00000025405	Inhbc	inhibin beta-C	3751.98	2514.49	100.02	67.1163	0.0265774	-5.23365	4.63866e-13	3.97882e-11
ENSMUSG00000031886	Ces2e	carboxylesterase 2E	4918.03	4140.17	145.904	97.4945	0.0267768	-5.22287	2.39953e-44	1.59142e-41
ENSMUSG00000040134	Rdh7	retinol dehydrogenase 7	44466.4	29258.8	1187.82	796.377	0.0268186	-5.22062	4.57593e-12	3.54724e-10
ENSMUSG00000037583	Nr0b2	nuclear receptor subfamily 0, group B, member 2	1631.13	1083.52	49.8345	23.6176	0.026964	-5.21282	3.21683e-12	2.55166e-10
ENSMUSG00000021214	Akr1c18	aldo-keto reductase family 1, member C18	3625.93	3879.97	97.2191	106.029	0.0269826	-5.21183	2.77054e-44	1.78782e-41
ENSMUSG00000037705	Tecta	tectorin alpha	6.8477	14.7385	0.228688	0.367093	0.0275032	-5.18425	0.000158055	0.00309069
ENSMUSG00000061171	Slc38a11	solute carrier family 38, member 11	35.9059	93.1031	2.3233	1.24313	0.0275544	-5.18157	0.0022774	0.0301414
ENSMUSG00000066513	Klk1b4	kallikrein 1-related pepidase b4	66.802	58.7307	2.56145	1.02792	0.0284961	-5.13309	1.72095e-10	1.0482e-08
ENSMUSG00000032310	Cyp1a2	cytochrome P450, family 1, subfamily a, polypeptide 2	3520.21	2907.06	127.501	56.5224	0.0285338	-5.13119	7.54917e-42	3.91835e-39
ENSMUSG00000035186	Ubd	ubiquitin D	178.93	121.589	2.30833	6.48438	0.0291477	-5.10047	1.1056e-12	9.16577e-11
ENSMUSG00000015843	Rxrg	retinoid X receptor gamma	98.3636	60.9301	2.34102	2.34865	0.0293339	-5.09129	9.26319e-09	4.31361e-07
ENSMUSG00000023073	Slc10a2	solute carrier family 10, member 2	3.82286	7.35778	0.329812	0	0.0294087	-5.08761	0.00715432	0.0732804
ENSMUSG00000037542	Aldh8a1	aldehyde dehydrogenase 8 family, member A1	4207.44	4439.78	180.515	74.8273	0.0294294	-5.0866	5.49374e-42	2.91486e-39
ENSMUSG00000027870	Hao2	hydroxyacid oxidase 2	4849.46	4127.58	113.491	154.483	0.0297429	-5.07131	9.84516e-44	5.73325e-41
ENSMUSG00000079507	H2-Q1	histocompatibility 2, Q region locus 1	138.456	73.6941	4.24714	2.13049	0.0299565	-5.06099	1.145e-05	0.000304772
ENSMUSG00000030237	Slco1a4	solute carrier organic anion transporter family, member 1a4	487.382	431.106	22.1872	6.12734	0.0307245	-5.02447	6.06015e-35	2.372e-32
ENSMUSG00000052562	Slc22a30	solute carrier family 22, member 30	74.5635	95.674	2.6208	2.67714	0.031012	-5.01103	1.06671e-22	2.0876e-20
ENSMUSG00000070810	Sult2a6	sulfotransferase family 2A, dehydroepiandrosterone (DHEA)-preferring, member 6	890.308	555.349	27.7332	17.458	0.0311498	-5.00463	3.80189e-09	1.87549e-07
ENSMUSG00000062181	Ces3b	carboxylesterase 3B	11.4349	13.6942	0.789223	0	0.0313089	-4.99728	0.000190428	0.00362572
ENSMUSG00000061959	Ces1e	carboxylesterase 1E	1174.88	785.759	29.103	32.5183	0.0313153	-4.99699	1.97811e-12	1.59022e-10
ENSMUSG00000063796	Slc22a8	solute carrier family 22 (organic anion transporter), member 8	26.7175	14.7198	0.312544	1.0034	0.0316357	-4.9823	4.55698e-06	0.000132042
ENSMUSG00000051225	Fam83a	family with sequence similarity 83, member A	142.723	152.329	3.61489	5.80268	0.0318029	-4.9747	8.27465e-22	1.51974e-19
ENSMUSG00000037095	Lrg1	leucine-rich alpha-2-glycoprotein 1	5499.13	3145.55	130.439	145.546	0.0318089	-4.97443	3.66688e-07	1.32052e-05
ENSMUSG00000033533	Acsm1	acyl-CoA synthetase medium-chain family member 1	5180.93	4439.72	194.559	116.861	0.0322578	-4.95421	1.5874e-40	7.73485e-38
ENSMUSG00000038522	AI317395	expressed sequence AI317395	387.616	323.998	10.5246	12.5344	0.0322872	-4.95289	3.68089e-32	1.2039e-29
ENSMUSG00000041737	Tmem45b	transmembrane protein 45b	29.711	18.6378	1.02531	0.548615	0.0324398	-4.94609	1.10611e-07	4.36519e-06
ENSMUSG00000051452	Gm11437	predicted gene 11437	11.3089	9.67379	0	0.696064	0.0330421	-4.91955	0.000750945	0.0120567
ENSMUSG00000046480	Scn4b	sodium channel, type IV, beta	105.261	70.6317	2.39267	3.49159	0.0333307	-4.907	3.79736e-12	2.97522e-10
ENSMUSG00000051323	Pcdh19	protocadherin 19	18.2564	21.1286	0.900028	0.424923	0.0335275	-4.89851	6.57934e-22	1.21774e-19
ENSMUSG00000001417	Rhbg	Rhesus blood group-associated B glycoprotein	811.287	855.473	38.7589	18.5325	0.0342564	-4.86748	1.86283e-34	6.94952e-32
ENSMUSG00000020159	Gabrp	gamma-aminobutyric acid (GABA) A receptor, pi	18.2818	14.9276	1.14708	0	0.034431	-4.86015	1.12958e-06	3.67042e-05
ENSMUSG00000036110	Slc17a2	solute carrier family 17 (sodium phosphate), member 2	3879.05	3456.75	138.911	117.779	0.0348682	-4.84195	3.6046e-40	1.72127e-37
ENSMUSG00000021539	Lect2	leukocyte cell-derived chemotaxin 2	17484	12240.9	553.192	495.623	0.0351579	-4.83001	1.00596e-14	1.02205e-12
ENSMUSG00000030827	Fgf21	fibroblast growth factor 21	661.246	292.128	17.9088	15.7647	0.0351918	-4.82862	0.000701231	0.0113818
ENSMUSG00000040966	Slc22a2	solute carrier family 22 (organic cation transporter), member 2	9.56934	8.81542	0.254025	0.407765	0.0358656	-4.80125	5.54659e-05	0.00124582
ENSMUSG00000020017	Hal	histidine ammonia lyase	2764.62	2357.43	137.202	48.8823	0.0362073	-4.78757	7.97097e-37	3.39848e-34
ENSMUSG00000046971	Pla2g4f	phospholipase A2, group IVF	10.3319	11.1639	0.187658	0.602461	0.0366198	-4.77123	3.87417e-07	1.38949e-05
ENSMUSG00000039653	Baat	bile acid-Coenzyme A: amino acid N-acyltransferase	1199.23	1544.57	66.7387	34.4538	0.0367561	-4.76587	1.45028e-26	3.53335e-24
ENSMUSG00000045775	Slc16a5	solute carrier family 16 (monocarboxylic acid transporters), member 5	3671.89	3899.78	220.736	61.8404	0.0371968	-4.74868	9.23132e-35	3.55495e-32
ENSMUSG00000034159	2310007B03Rik	RIKEN cDNA 2310007B03 gene	21.361	21.927	1.22859	0.394431	0.0373688	-4.74202	4.28373e-09	2.10017e-07
ENSMUSG00000022877	Hrg	histidine-rich glycoprotein	20301.1	16179.2	951.211	420.269	0.0374663	-4.73826	1.69033e-31	5.38112e-29
ENSMUSG00000091730	Gm17230	predicted gene 17230	9.87353	10.8108	0.136292	0.656334	0.0381753	-4.71121	9.27176e-09	4.31361e-07
ENSMUSG00000020218	Wif1	Wnt inhibitory factor 1	77.7359	89.6786	2.95335	3.55557	0.0387411	-4.68999	9.67666e-21	1.60339e-18
ENSMUSG00000078612	1700024P16Rik	RIKEN cDNA 1700024P16 gene	54.7058	79.854	3.29078	1.94615	0.0387877	-4.68826	3.80064e-12	2.97522e-10
ENSMUSG00000021565	Slc6a19	solute carrier family 6 (neurotransmitter transporter), member 19	81.6469	112.699	4.48253	3.08375	0.0387991	-4.68783	2.99923e-13	2.64242e-11
ENSMUSG00000022408	Fam83f	family with sequence similarity 83, member F	292.823	168.475	8.27113	9.81338	0.0390601	-4.67816	9.45757e-07	3.14497e-05
ENSMUSG00000092021	Gbp11	guanylate binding protein 11	79.7594	135.792	1.60337	6.86335	0.0391343	-4.67542	1.57881e-07	6.01206e-06
ENSMUSG00000028036	Ptgfr	prostaglandin F receptor	8.11392	9.54354	0.700018	0	0.0395206	-4.66125	0.00143587	0.0205164
ENSMUSG00000021335	Slc17a1	solute carrier family 17 (sodium phosphate), member 1	647.247	387.459	28.1871	13.0255	0.0396918	-4.65502	3.10221e-07	1.13602e-05
ENSMUSG00000019906	Lin7a	lin-7 homolog A (C, elegans)	132.442	178.129	3.48753	8.98664	0.0400183	-4.6432	2.14991e-20	3.42208e-18
ENSMUSG00000035031	C8a	complement component 8, alpha polypeptide	3682.2	4240.83	126.643	191.753	0.0400419	-4.64235	4.68893e-39	2.19516e-36
ENSMUSG00000032500	Dclk3	doublecortin-like kinase 3	164.818	123.078	6.61011	5.18194	0.0408146	-4.61477	5.01057e-19	7.43058e-17
ENSMUSG00000046814	Gchfr	GTP cyclohydrolase I feedback regulator	9476.32	4767.49	387.33	200.563	0.0411282	-4.60373	0.000120874	0.00244782
ENSMUSG00000029352	Crybb3	crystallin, beta B3	216.876	119.262	5.34591	8.58132	0.0412789	-4.59845	9.77026e-06	0.00026329
ENSMUSG00000039956	Mrap	melanocortin 2 receptor accessory protein	2158.24	1641.06	107.97	49.815	0.0413872	-4.59467	4.35495e-21	7.37438e-19
ENSMUSG00000029843	Slc13a4	solute carrier family 13 (sodium/sulfate symporters), member 4	40.7554	29.158	1.27859	1.64193	0.0416213	-4.58653	3.89784e-12	3.04134e-10
ENSMUSG00000037145	2210407C18Rik	RIKEN cDNA 2210407C18 gene	94.1935	48.6487	3.06657	2.9535	0.0419918	-4.57375	0.000112007	0.00229552
ENSMUSG00000006538	Ihh	Indian hedgehog	92.4046	59.9645	2.1992	4.23622	0.0420781	-4.57079	1.26902e-09	6.70336e-08
ENSMUSG00000023968	Crip3	cysteine-rich protein 3	23.2999	56.1694	2.19291	1.17336	0.0422204	-4.56591	0.00358165	0.042835
ENSMUSG00000015083	C8g	complement component 8, gamma polypeptide	14218.2	7559.59	622.886	300.064	0.042232	-4.56552	3.44321e-05	0.000814768
ENSMUSG00000070661	Rnf186	ring finger protein 186	137.808	96.6427	5.14128	4.81416	0.0423107	-4.56283	9.62109e-13	8.03193e-11
ENSMUSG00000005089	Slc1a2	solute carrier family 1 (glial high affinity glutamate transporter), member 2	1433.99	2339.54	54.8737	105.701	0.0424005	-4.55977	1.96108e-08	8.63888e-07
ENSMUSG00000050541	Adra1b	adrenergic receptor, alpha 1b	498.174	435.324	23.4513	16.4163	0.0425587	-4.5544	1.09012e-32	3.61495e-30
ENSMUSG00000035875	AI182371	expressed sequence AI182371	14538.3	13822.7	772.813	444.665	0.0427801	-4.54692	1.44199e-35	5.93601e-33
ENSMUSG00000086389	Gm15998	predicted gene 15998	10.9757	9.38875	0.874073	0	0.0427854	-4.54674	0.000220792	0.00416401
ENSMUSG00000054136	Adm2	adrenomedullin 2	64.1849	33.1982	2.57557	1.65373	0.0432751	-4.53032	0.000158485	0.00309655
ENSMUSG00000091166	Tstd1	thiosulfate sulfurtransferase (rhodanese)-like domain containing 1	6798.19	3644.81	232.067	223.823	0.0434966	-4.52295	2.12588e-05	0.000532608
ENSMUSG00000041293	Gpr110	G protein-coupled receptor 110	162.03	255.084	4.32265	14.1014	0.0440083	-4.50608	1.50503e-09	7.86302e-08
ENSMUSG00000019768	Esr1	estrogen receptor 1 (alpha)	579.635	647.815	31.9644	22.9119	0.0445532	-4.48833	9.21481e-33	3.09877e-30
ENSMUSG00000070704	Ugt2b36	UDP glucuronosyltransferase 2 family, polypeptide B36	17369.4	15227.4	867.373	613.564	0.0452733	-4.4652	4.54614e-35	1.80906e-32
ENSMUSG00000032207	Lipc	lipase, hepatic	5312.3	4085.49	240.215	186.956	0.0452938	-4.46454	4.96187e-23	9.95543e-21
ENSMUSG00000027965	Olfm3	olfactomedin 3	4.35984	9.49318	0.410334	0.219558	0.0453197	-4.46372	0.00137429	0.0198383
ENSMUSG00000074071	Fam169b	family with sequence similarity 169, member B	537.832	477.984	25.2946	21.0926	0.0455042	-4.45786	8.98067e-30	2.55265e-27
ENSMUSG00000033854	Kcnk10	potassium channel, subfamily K, member 10	5.53167	3.68034	0.424211	0	0.0459018	-4.4453	0.00474137	0.0531978
ENSMUSG00000081223	Gm12247	predicted gene 12247	102.241	57.6433	4.81132	2.5744	0.0460318	-4.44122	2.16579e-05	0.000540905
ENSMUSG00000049404	Rarres1	retinoic acid receptor responder (tazarotene induced) 1	1391.84	1079.62	76.5836	39.7168	0.0468948	-4.41443	4.048e-23	8.3319e-21
ENSMUSG00000020884	Asgr1	asialoglycoprotein receptor 1	20670.3	11916.3	1042.87	501.628	0.0472313	-4.40411	3.86723e-06	0.000113992
ENSMUSG00000031173	Otc	ornithine transcarbamylase	7200.32	5772.46	375.761	242.698	0.0475073	-4.39571	1.10536e-30	3.29896e-28
ENSMUSG00000022821	Hgd	homogentisate 1, 2-dioxygenase	12322.7	11311.7	831.598	296.791	0.0475827	-4.39342	3.49897e-33	1.22855e-30
ENSMUSG00000056133	Gm9992	predicted gene 9992	97.7312	138.777	5.39625	5.95521	0.0478281	-4.386	3.62643e-13	3.1716e-11
ENSMUSG00000046840	0610008F07Rik	RIKEN cDNA 0610008F07 gene	46.5832	27.2643	0.846084	2.71629	0.048055	-4.37917	2.19652e-05	0.000546863
ENSMUSG00000030651	Art2b	ADP-ribosyltransferase 2b	16.1054	24.4921	0	1.98258	0.0486466	-4.36152	0.00012569	0.0025282
ENSMUSG00000063683	Glyat	glycine-N-acyltransferase	8280.62	7539.44	502.472	270.648	0.0487017	-4.35988	6.69312e-33	2.28293e-30
ENSMUSG00000032204	Aqp9	aquaporin 9	25363.5	22145.5	1326.66	1014.99	0.0491156	-4.34767	9.30675e-34	3.36679e-31
ENSMUSG00000016756	Cmah	cytidine monophospho-N-acetylneuraminic acid hydroxylase	2097.14	3573.11	125.715	154.077	0.0491717	-4.34603	6.63493e-07	2.29921e-05
ENSMUSG00000070690	5830473C10Rik	RIKEN cDNA 5830473C10 gene	543.268	732.734	36.9204	26.169	0.0492739	-4.34303	1.02863e-17	1.33477e-15
ENSMUSG00000000739	Sult5a1	sulfotransferase family 5A, member 1	124.811	179.815	9.06774	6.06486	0.049507	-4.33622	1.64924e-11	1.19688e-09
ENSMUSG00000024992	Pde6c	phosphodiesterase 6C, cGMP specific, cone, alpha prime	883.543	740.752	46.5267	34.5382	0.0497327	-4.32966	1.15289e-31	3.71978e-29
ENSMUSG00000026272	Agxt	alanine-glyoxylate aminotransferase	16568.3	12008.4	939.336	486.87	0.0497351	-4.32959	7.26927e-15	7.48109e-13
ENSMUSG00000037035	Inhbb	inhibin beta-B	1447.82	1176.52	64.9009	66.4805	0.0498837	-4.32529	2.10067e-33	7.48592e-31
ENSMUSG00000054863	Fam19a5	family with sequence similarity 19, member A5	35.0671	14.9984	0.834584	1.67461	0.0499277	-4.32401	0.00260287	0.0333581
ENSMUSG00000027514	Zbp1	Z-DNA binding protein 1	342.055	236.355	8.37364	20.8126	0.0502696	-4.31417	2.87157e-12	2.28538e-10
ENSMUSG00000073418	C4b	complement component 4B (Chido blood group)	63000.7	67869	3543.97	3085.73	0.0504816	-4.3081	4.32719e-34	1.58948e-31
ENSMUSG00000059654	Reg1	regenerating islet-derived 1	174.109	112.567	14.6717	0	0.0510139	-4.29296	1.89442e-07	7.14553e-06
ENSMUSG00000031722	Hp	haptoglobin	225362	160648	11599	8169.58	0.0510321	-4.29245	9.60128e-14	8.81693e-12
ENSMUSG00000085651	Gm11695	predicted gene 11695	45.9024	62.1705	1.32006	4.23795	0.0512385	-4.28663	3.34588e-05	0.000794887
ENSMUSG00000048337	Ppyr1	pancreatic polypeptide receptor 1	7.2971	2.93743	0.296258	0.237779	0.0519902	-4.26562	0.00997016	0.0935353
ENSMUSG00000074207	Adh1	alcohol dehydrogenase 1 (class I)	44837.8	20465.3	2064.76	1400.99	0.0528813	-4.2411	0.00132259	0.0191981
ENSMUSG00000015224	Cyp2j9	cytochrome P450, family 2, subfamily j, polypeptide 9	126.646	105.422	4.46447	7.92079	0.0531729	-4.23317	1.52775e-21	2.72213e-19
ENSMUSG00000031163	Glod5	glyoxalase domain containing 5	25.4464	33.6402	3.19325	0	0.0538758	-4.21422	0.000240332	0.00447944
ENSMUSG00000042306	S100a14	S100 calcium binding protein A14	32.2109	18.3691	1.05865	1.69936	0.0543249	-4.20224	3.48412e-05	0.000820826
ENSMUSG00000027670	Ocstamp	osteoclast stimulatory transmembrane protein	138.785	188.638	9.10865	8.96146	0.0549967	-4.18451	2.65918e-16	3.12761e-14
ENSMUSG00000090306	Adh6-ps1	alcohol dehydrogenase 6 (class V), pseudogene 1	70.3349	69.7156	4.04537	3.71068	0.0551853	-4.17957	2.32227e-18	3.16837e-16
ENSMUSG00000009281	Rarres2	retinoic acid receptor responder (tazarotene induced) 2	33661.6	20683.6	1889.53	1137.72	0.055508	-4.17116	4.37827e-07	1.55097e-05
ENSMUSG00000007021	Syngr3	synaptogyrin 3	13.3179	7.9746	0.459593	0.737744	0.0560243	-4.1578	0.00311523	0.0384388
ENSMUSG00000022149	C9	complement component 9	3962.91	2878.75	229.6	162.165	0.05706	-4.13138	2.03694e-14	2.00967e-12
ENSMUSG00000087613	Gm13855	predicted gene 13855	85.7946	110.98	7.94341	3.47751	0.0578467	-4.11162	1.23579e-10	7.68376e-09
ENSMUSG00000069324	Gm5096	predicted gene 5096	62.0062	42.2894	3.75911	2.32084	0.0580909	-4.10554	1.14287e-09	6.0909e-08
ENSMUSG00000022766	Serpind1	serine (or cysteine) peptidase inhibitor, clade D, member 1	27054.5	22763	1607.99	1327.59	0.0587188	-4.09003	5.22736e-31	1.62089e-28
ENSMUSG00000026839	Upp2	uridine phosphorylase 2	955.027	1093.72	81.8255	40.1339	0.0593276	-4.07515	3.82916e-28	1.02725e-25
ENSMUSG00000045282	Tmem86b	transmembrane protein 86B	2817.66	1985.63	177.473	108.863	0.0594039	-4.0733	5.76636e-12	4.44121e-10
ENSMUSG00000036151	Tm6sf2	transmembrane 6 superfamily member 2	5945.41	4519.61	445.899	180.136	0.0596173	-4.06812	1.2291e-17	1.58627e-15
ENSMUSG00000015451	C4a	complement component 4A (Rodgers blood group)	248.529	303.708	18.3785	14.7507	0.0597832	-4.06412	2.58285e-19	3.85426e-17
ENSMUSG00000046959	Slc26a1	solute carrier family 26 (sulfate transporter), member 1	2647.12	3249.88	208.472	146.067	0.0599154	-4.06093	2.34037e-30	6.73236e-28
ENSMUSG00000025916	Ppp1r42	protein phosphatase 1, regulatory subunit 42	90.2526	69.483	3.73749	5.99946	0.0607329	-4.04138	2.11326e-10	1.26457e-08
ENSMUSG00000067049	Unc93a	unc-93 homolog A (C, elegans)	141.961	109.342	10.7737	4.56826	0.0608408	-4.03882	1.85468e-18	2.55968e-16
ENSMUSG00000047394	Odf3b	outer dense fiber of sperm tails 3B	182.807	112.796	9.82484	8.30051	0.0610969	-4.03276	8.11945e-07	2.73814e-05
ENSMUSG00000031549	Ido2	indoleamine 2,3-dioxygenase 2	200.639	183.035	19.0628	4.57239	0.0613981	-4.02566	8.76637e-22	1.59775e-19
ENSMUSG00000031645	F11	coagulation factor XI	3151.87	3621.39	210.692	207.535	0.0615299	-4.02257	2.30979e-30	6.72544e-28
ENSMUSG00000054161	Fam83e	family with sequence similarity 83, member E	15.5149	9.69851	1.23556	0.330557	0.0619042	-4.01382	6.77395e-06	0.000188722
ENSMUSG00000040412	5330417C22Rik	RIKEN cDNA 5330417C22 gene	434.514	334.675	19.5991	28.4644	0.0622579	-4.0056	1.96704e-20	3.15201e-18
ENSMUSG00000066319	Rtp3	receptor transporter protein 3	1577.62	1537.36	122.534	72.6251	0.0624362	-4.00147	1.05123e-27	2.67011e-25
ENSMUSG00000070985	Acnat1	acyl-coenzyme A amino acid N-acyltransferase 1	662.058	1284.68	80.3182	41.8144	0.0625297	-3.99932	0.000220786	0.00416401
ENSMUSG00000092517	Art2a-ps	ADP-ribosyltransferase 2a, pseudogene	101.561	111.245	5.12901	8.23315	0.0625636	-3.99853	4.10503e-15	4.37553e-13
ENSMUSG00000036578	Fxyd7	FXYD domain-containing ion transport regulator 7	36.4177	23.3642	0	3.78256	0.0630196	-3.98806	9.91727e-05	0.0020662
ENSMUSG00000036585	Fgf1	fibroblast growth factor 1	9758.3	9930.84	636.233	625.153	0.063839	-3.96942	4.20196e-29	1.16658e-26
ENSMUSG00000091742	Gm5093	predicted gene 5093	178.949	125.012	11.3216	8.26075	0.0641964	-3.96136	2.43587e-10	1.44315e-08
ENSMUSG00000028008	Accn5	amiloride-sensitive cation channel 5, intestinal	50.7365	38.5784	4.2151	1.56142	0.0644559	-3.95554	5.674e-10	3.1951e-08
ENSMUSG00000068083	Cyp2d40	cytochrome P450, family 2, subfamily d, polypeptide 40	437.154	326.917	35.6325	14.1137	0.0648844	-3.94599	6.46696e-15	6.68421e-13
ENSMUSG00000022755	Gpr128	G protein-coupled receptor 128	16.7342	18.7572	1.99134	0.319653	0.0649035	-3.94556	1.56953e-07	5.99586e-06
ENSMUSG00000074336	Apoc4	apolipoprotein C-IV	64810.9	37217.5	4256.42	2421.85	0.0652247	-3.93844	2.1182e-05	0.000531799
ENSMUSG00000074768	Bhmt	betaine-homocysteine methyltransferase	15917	19023.8	1929.74	365.323	0.0654712	-3.933	1.7458e-27	4.38767e-25
ENSMUSG00000061322	Dnaic1	dynein, axonemal, intermediate chain 1	2387.72	1621.57	135.847	128.693	0.065745	-3.92698	6.54599e-10	3.6012e-08
ENSMUSG00000006218	Fam131c	family with sequence similarity 131, member C	159.706	93.8643	13.1223	3.61098	0.0657663	-3.92651	2.12236e-05	0.000532285
ENSMUSG00000039533	Mmd2	monocyte to macrophage differentiation-associated 2	872.029	991.778	70.9318	52.3707	0.0659276	-3.92297	7.3237e-28	1.9429e-25
ENSMUSG00000024863	Mbl2	mannose-binding lectin (protein C) 2	19648.1	12091.1	1482.48	635.263	0.0664925	-3.91067	1.85038e-06	5.77512e-05
ENSMUSG00000029711	Epo	erythropoietin	33.4385	62.2553	4.41215	2.17921	0.068652	-3.86455	0.000178506	0.00342882
ENSMUSG00000066252	Bhmt-ps1	betaine-homocysteine methyltransferase, pseudogene 1	30.624	24.0722	2.85627	0.916983	0.0687527	-3.86244	9.98735e-08	3.98094e-06
ENSMUSG00000071107	4732465J04Rik	RIKEN cDNA 4732465J04 gene	48.6816	24.4959	2.96467	2.11508	0.0691682	-3.85375	0.000893806	0.0138936
ENSMUSG00000006529	Itih1	inter-alpha trypsin inhibitor, heavy chain 1	20204.2	18604.4	1284.58	1417.38	0.0693741	-3.84946	8.96012e-29	2.45899e-26
ENSMUSG00000037171	Nodal	nodal	52.7622	35.5983	4.10321	2.05829	0.0694892	-3.84707	1.66965e-08	7.43741e-07
ENSMUSG00000028339	Col15a1	collagen, type XV, alpha 1	728.742	1040.85	47.2487	77.0676	0.0700005	-3.83649	1.1824e-11	8.82217e-10
ENSMUSG00000028167	Bdh2	3-hydroxybutyrate dehydrogenase, type 2	66.5203	56.9024	2.44211	6.27217	0.0703415	-3.82948	5.49299e-10	3.10049e-08
ENSMUSG00000048856	Slc25a47	solute carrier family 25, member 47	14198.1	8751.31	1159.25	474.633	0.0709494	-3.81707	2.75092e-06	8.29306e-05
ENSMUSG00000083022	Rps15a-ps6	ribosomal protein S15A, pseudogene 6	99.0368	54.2192	6.83542	4.38892	0.0729793	-3.77637	0.000299321	0.00540531
ENSMUSG00000028427	Aqp7	aquaporin 7	106.036	99.2087	6.47994	8.5661	0.0730437	-3.7751	2.00924e-14	1.99056e-12
ENSMUSG00000001349	Cnn1	calponin 1	54.5689	36.5559	3.40327	3.27779	0.0730542	-3.77489	1.6008e-08	7.15741e-07
ENSMUSG00000036123	Slc9a3	solute carrier family 9 (sodium/hydrogen exchanger), member 3	3.75146	8.02264	0.863074	0	0.0730808	-3.77436	0.00617259	0.0652398
ENSMUSG00000040181	Fmo1	flavin containing monooxygenase 1	6937.38	6328.35	559.941	413.691	0.0731381	-3.77323	1.01439e-26	2.49686e-24
ENSMUSG00000087241	Gm11844	predicted gene 11844	274.74	295.946	26.9217	15.0313	0.0732624	-3.77078	3.23851e-13	2.84274e-11
ENSMUSG00000025478	Dpysl4	dihydropyrimidinase-like 4	9.52692	9.05496	1.0959	0.293191	0.0745068	-3.74648	6.23156e-05	0.00138147
ENSMUSG00000010601	Apol7a	apolipoprotein L 7a	1086.86	1137.25	100.995	65.6912	0.0746866	-3.74301	1.50421e-24	3.3565e-22
ENSMUSG00000071633	Gm4952	predicted gene 4952	7288.7	5877.64	659.57	327.578	0.0747172	-3.74242	1.26501e-24	2.84938e-22
ENSMUSG00000032224	Fam81a	family with sequence similarity 81, member A	231.174	351.555	18.7131	25.2956	0.0752555	-3.73206	2.26068e-08	9.81383e-07
ENSMUSG00000051354	Samd3	sterile alpha motif domain containing 3	4.85002	6.51951	0.478205	0.383811	0.0755568	-3.72629	0.0045801	0.051797
ENSMUSG00000028715	Cyp4a14	cytochrome P450, family 4, subfamily a, polypeptide 14	26418.3	23401	3000.51	804.085	0.0761135	-3.7157	6.08808e-25	1.39768e-22
ENSMUSG00000060550	H2-Q7	histocompatibility 2, Q region locus 7	760.518	966.409	62.3796	70.215	0.0765104	-3.7082	1.7719e-22	3.38446e-20
ENSMUSG00000060613	Cyp2c70	cytochrome P450, family 2, subfamily c, polypeptide 70	31286.1	18391.5	2476.9	1346.87	0.0767018	-3.7046	2.27867e-05	0.000564372
ENSMUSG00000031489	Adrb3	adrenergic receptor, beta 3	40.0908	37.8665	4.61171	1.38802	0.0767049	-3.70454	3.78324e-09	1.87016e-07
ENSMUSG00000059481	Plg	plasminogen	58282.4	52190.9	4950.43	3558.32	0.0767519	-3.70365	2.82318e-26	6.67389e-24
ENSMUSG00000022157	Mcpt8	mast cell protease 8	38.2386	56.074	1.25676	6.05209	0.0772069	-3.69513	3.52995e-07	1.27506e-05
ENSMUSG00000056643	Chst13	carbohydrate (chondroitin 4) sulfotransferase 13	336.643	233.118	22.7792	21.4169	0.0772914	-3.69355	5.7796e-10	3.22415e-08
ENSMUSG00000073555	Gm4951	predicted gene 4951	937.058	1222.5	76.3747	91.6222	0.0775179	-3.68933	1.17585e-18	1.63224e-16
ENSMUSG00000003617	Cp	ceruloplasmin	75303.9	88308.2	7448.86	5285.11	0.0775622	-3.6885	2.28712e-26	5.46072e-24
ENSMUSG00000030838	Ush1c	Usher syndrome 1C homolog (human)	7.16346	5.44686	0.549349	0.440911	0.0782499	-3.67577	0.00657353	0.068687
ENSMUSG00000084939	Gm830	predicted gene 830	97.3592	87.8458	9.66522	4.92532	0.0785105	-3.67097	7.91695e-18	1.05014e-15
ENSMUSG00000042784	Muc1	mucin 1, transmembrane	448.375	292.987	48.3537	10.3491	0.0789168	-3.66352	8.45812e-07	2.84832e-05
ENSMUSG00000002633	Shh	sonic hedgehog	4.04829	5.93651	0.798312	0	0.079706	-3.64917	0.00593798	0.063465
ENSMUSG00000054545	Ugt1a6a	UDP glucuronosyltransferase 1 family, polypeptide A6A	225.7	306.125	25.7288	16.8955	0.0798743	-3.64613	1.30741e-13	1.19601e-11
ENSMUSG00000044505	Lingo4	leucine rich repeat and Ig domain containing 4	29.4714	16.0761	2.50576	1.18302	0.0807046	-3.63121	0.00035254	0.00623962
ENSMUSG00000086103	Gm11832	predicted gene 11832	464.895	262.036	31.0916	27.9489	0.0809259	-3.62726	9.3772e-05	0.00197608
ENSMUSG00000047730	Fcgbp	Fc fragment of IgG binding protein	12.1778	9.11494	1.31328	0.42162	0.0812028	-3.62233	1.87046e-06	5.83017e-05
ENSMUSG00000024485	Slc4a9	solute carrier family 4, sodium bicarbonate cotransporter, member 9	17.8724	13.8551	1.34918	1.23756	0.0812395	-3.62168	8.0419e-07	2.72592e-05
ENSMUSG00000029369	Afm	afamin	10621.1	8302.27	886.73	662.282	0.081569	-3.61583	1.29818e-19	1.98688e-17
ENSMUSG00000074489	Bglap-rs1	bone gamma-carboxyglutamate protein, related sequence 1	34.2585	17.9087	3.28401	1.05431	0.0828756	-3.59291	0.00166398	0.0232198
ENSMUSG00000020072	Pbld1	phenazine biosynthesis-like protein domain containing 1	3580.02	3091.2	338.154	227.361	0.0844739	-3.56535	4.34032e-24	9.59533e-22
ENSMUSG00000029273	Sult1d1	sulfotransferase family 1D, member 1	3561.08	3871.6	438.199	195.583	0.084982	-3.5567	1.70007e-23	3.62419e-21
ENSMUSG00000074623	Gm826	predicted gene 826	95.3178	68.9922	5.904	8.12329	0.0850592	-3.55539	1.39777e-07	5.39146e-06
ENSMUSG00000006777	Krt23	keratin 23	589.915	348.044	53.5547	27.0024	0.0855855	-3.54649	4.04588e-05	0.000939719
ENSMUSG00000078452	Raet1d	retinoic acid early transcript delta	397.233	464.321	20.8605	53.9868	0.0865548	-3.53024	2.36707e-21	4.1556e-19
ENSMUSG00000073409	H2-Q6	histocompatibility 2, Q region locus 6	402.163	653.283	44.1587	48.3812	0.0873737	-3.51666	2.46683e-06	7.48387e-05
ENSMUSG00000029596	Sdsl	serine dehydratase-like	523.613	415.291	46.4898	35.9049	0.087447	-3.51545	1.65591e-19	2.50231e-17
ENSMUSG00000021884	Hacl1	2-hydroxyacyl-CoA lyase 1	12850.2	9385.09	1262.95	690.509	0.0875487	-3.51377	8.81846e-12	6.68411e-10
ENSMUSG00000089991	Gm16332	predicted gene 16332	30.9279	33.0702	2.35435	3.27534	0.0876508	-3.51209	1.24021e-11	9.19604e-10
ENSMUSG00000073738	Gm10567	predicted gene 10567	1059.54	1236.38	75.1233	127.778	0.0880558	-3.50544	1.04009e-24	2.36507e-22
ENSMUSG00000042808	Gpx2	glutathione peroxidase 2	20.4274	11.2332	2.01411	0.808269	0.0888359	-3.49271	0.00256237	0.0330163
ENSMUSG00000085834	Gm15622	predicted gene 15622	29.776	50.9416	6.6057	0.589087	0.0888569	-3.49237	0.000170838	0.00330021
ENSMUSG00000085923	Gm12781	predicted gene 12781	31.5313	53.9446	5.44064	2.18335	0.0889017	-3.49164	0.00186516	0.0255218
ENSMUSG00000020524	Gria1	glutamate receptor, ionotropic, AMPA1 (alpha 1)	3.77526	4.96832	0.300651	0.482609	0.0892604	-3.48584	0.00016711	0.00324119
ENSMUSG00000063232	Serpina11	serine (or cysteine) peptidase inhibitor, clade A (alpha-1 antiproteinase, antitrypsin), member 11	8571.09	4883.11	679.956	528.582	0.0895046	-3.48189	9.96835e-05	0.00207502
ENSMUSG00000038530	Rgs4	regulator of G-protein signaling 4	143.896	226.011	24.4116	9.04288	0.0901432	-3.47164	2.18705e-06	6.72045e-05
ENSMUSG00000046312	AI464131	expressed sequence AI464131	602.019	523.676	56.3809	46.132	0.0907457	-3.46203	1.38604e-21	2.4882e-19
ENSMUSG00000042498	D330045A20Rik	RIKEN cDNA D330045A20 gene	57.9238	60.2428	4.31422	6.46355	0.0908792	-3.45991	1.47614e-15	1.64693e-13
ENSMUSG00000051079	Rgs13	regulator of G-protein signaling 13	15.3536	7.88023	2.11938	0	0.0909228	-3.45921	0.00516999	0.0572536
ENSMUSG00000047517	Dmbt1	deleted in malignant brain tumors 1	229.749	158.974	35.5536	0	0.0911689	-3.45531	7.89529e-07	2.69297e-05
ENSMUSG00000043760	Pkhd1	polycystic kidney and hepatic disease 1	540.669	654.16	53.3692	55.9883	0.091204	-3.45476	9.73745e-21	1.60339e-18
ENSMUSG00000029254	Stap1	signal transducing adaptor family member 1	53.9951	116.87	4.79952	10.8766	0.0914184	-3.45137	0.00248787	0.0323003
ENSMUSG00000026621	Mosc1	MOCO sulphurase C-terminal domain containing 1	5073.58	3796.42	643.252	178.124	0.0922903	-3.43768	1.103e-11	8.25559e-10
ENSMUSG00000046070	Igfals	insulin-like growth factor binding protein, acid labile subunit	3560.64	2197.94	288.865	247.165	0.0927502	-3.43051	6.59432e-06	0.000183932
ENSMUSG00000084224	Gm12337	predicted gene 12337	66.1665	79.9055	9.40211	4.31211	0.0935713	-3.41779	7.80795e-05	0.00167948
ENSMUSG00000026368	F13b	coagulation factor XIII, beta subunit	26231.8	27747.6	2912.31	2205.68	0.0944844	-3.40378	6.45037e-23	1.28341e-20
ENSMUSG00000023033	Scn8a	sodium channel, voltage-gated, type VIII, alpha	2.01983	3.82583	0.398305	0.159841	0.0951684	-3.39337	0.00109433	0.0164432
ENSMUSG00000024694	Keg1	kidney expressed gene 1	1140.44	681.989	125.65	48.6852	0.0953313	-3.39091	6.00168e-05	0.00133423
ENSMUSG00000041828	Abca8a	ATP-binding cassette, sub-family A (ABC1), member 8a	7841.51	9173.43	907.507	721.107	0.0953849	-3.39009	1.24815e-22	2.42284e-20
ENSMUSG00000000154	Slc22a18	solute carrier family 22 (organic cation transporter), member 18	3926.47	2345.56	367.11	237.406	0.0960421	-3.38019	3.80041e-05	0.000889191
ENSMUSG00000026888	Grb14	growth factor receptor bound protein 14	4831.41	4624.99	482.47	429.498	0.0960996	-3.37933	3.37623e-22	6.34732e-20
ENSMUSG00000016028	Celsr1	cadherin, EGF LAG seven-pass G-type receptor 1 (flamingo homolog, Drosophila)	33.955	44.7133	3.01451	4.60479	0.0965075	-3.37322	1.57395e-15	1.74789e-13
ENSMUSG00000030711	Sult1a1	sulfotransferase family 1A, phenol-preferring, member 1	10792.6	6936.37	1151.74	565.215	0.0965082	-3.3732	2.52338e-06	7.63601e-05
ENSMUSG00000000686	Abhd15	abhydrolase domain containing 15	903.557	932.907	86.3622	91.9334	0.0967423	-3.36971	9.91239e-19	1.39217e-16
ENSMUSG00000039632	Ccdc151	coiled-coil domain containing 151	12.0385	6.05758	0.977509	0.784556	0.0970221	-3.36554	0.00311122	0.0384093
ENSMUSG00000032719	Gm106	predicted gene 106	5.66542	6.78479	0.586532	0.627673	0.0971816	-3.36317	0.00184421	0.0253059
ENSMUSG00000006014	Prg4	proteoglycan 4 (megakaryocyte stimulating factor, articular superficial zone protein)	590.352	720.997	75.1208	53.3789	0.0976536	-3.35618	4.54128e-21	7.63574e-19
ENSMUSG00000046997	Spsb4	splA/ryanodine receptor domain and SOCS box containing 4	67.8534	74.8106	6.24423	7.93512	0.0990353	-3.33591	1.64757e-12	1.33347e-10
ENSMUSG00000026866	Kynu	kynureninase (L-kynurenine hydrolase)	3689.39	4394.1	503.425	306.982	0.0999124	-3.32319	1.84296e-21	3.25945e-19
ENSMUSG00000028150	Rorc	RAR-related orphan receptor gamma	1053.98	734.841	103.758	76.1392	0.100212	-3.31887	5.61854e-09	2.71007e-07
ENSMUSG00000090623	Cfhr3	complement factor H-related 3	240.397	257.865	28.9701	21.1378	0.100217	-3.3188	4.69735e-10	2.68311e-08
ENSMUSG00000022323	Hrsp12	heat-responsive protein 12	19484.6	13862.9	1893	1463.06	0.100282	-3.31786	5.72e-10	3.19837e-08
ENSMUSG00000051748	1100001G20Rik	RIKEN cDNA 1100001G20 gene	706.684	702.702	44.5656	97.3703	0.100337	-3.31708	1.03397e-16	1.24056e-14
ENSMUSG00000032092	Mpzl2	myelin protein zero-like 2	886.913	1092.58	118.623	80.7741	0.100386	-3.31637	2.99728e-21	5.18572e-19
ENSMUSG00000037025	Foxa2	forkhead box A2	1232.76	850.329	98.4831	111.66	0.100515	-3.31452	7.81586e-09	3.69528e-07
ENSMUSG00000044005	Gls2	glutaminase 2 (liver, mitochondrial)	13711.8	11913.9	2010.62	578.829	0.100711	-3.31171	2.29716e-20	3.60836e-18
ENSMUSG00000043587	Acpl2	acid phosphatase-like 2	573.01	686.225	56.7112	70.6708	0.100799	-3.31045	6.69607e-18	8.93159e-16
ENSMUSG00000059325	Hopx	HOP homeobox	126.647	73.3178	9.71224	10.6297	0.101357	-3.30248	0.000109214	0.00224599
ENSMUSG00000017723	Wfdc2	WAP four-disulfide core domain 2	1095.97	586.719	117.722	54.2784	0.101861	-3.29533	0.00105756	0.0159308
ENSMUSG00000024391	Apom	apolipoprotein M	88784.3	56519.2	9312.15	5653.88	0.102636	-3.28439	4.64119e-06	0.000134319
ENSMUSG00000059027	9630013D21Rik	RIKEN cDNA 9630013D21 gene	73.6663	60.7646	5.9015	8.01576	0.103152	-3.27716	6.50357e-09	3.09939e-07
ENSMUSG00000092471	Cyp21a2-ps	cytochrome P450, family 21, subfamily a, polypeptide 2 pseudogene	12.3828	21.1849	3.49629	0	0.103838	-3.2676	0.000817598	0.0129476
ENSMUSG00000053219	Raet1c	retinoic acid early transcript gamma	94.9608	103.676	6.89905	13.8431	0.104041	-3.26478	1.4766e-11	1.08807e-09
ENSMUSG00000038541	Srd5a2	steroid 5 alpha-reductase 2	21.8762	31.1887	2.51646	3.02959	0.104147	-3.26331	0.000413543	0.00720713
ENSMUSG00000064202	4430402I18Rik	RIKEN cDNA 4430402I18 gene	198.624	133.676	12.096	22.6528	0.104182	-3.26283	9.33787e-08	3.75971e-06
ENSMUSG00000025494	Sigirr	single immunoglobulin and toll-interleukin 1 receptor (TIR) domain	792.511	574.864	85.5842	57.6393	0.104375	-3.26015	1.45261e-10	8.96189e-09
ENSMUSG00000044361	BC024139	cDNA sequence BC024139	70.7025	32.64	6.19659	4.66258	0.104701	-3.25565	0.00711807	0.0730344
ENSMUSG00000026489	Adck3	aarF domain containing kinase 3	22058.4	14894	2697.51	1205.43	0.105256	-3.24802	3.59392e-07	1.2962e-05
ENSMUSG00000035836	Ugt2b1	UDP glucuronosyltransferase 2 family, polypeptide B1	2776.69	2572.94	340.775	226.248	0.105625	-3.24298	1.24167e-20	2.01674e-18
ENSMUSG00000030968	Pdilt	protein disulfide isomerase-like, testis expressed	40.0314	38.6017	5.52585	2.82233	0.105804	-3.24054	1.28652e-08	5.80663e-07
ENSMUSG00000023057	Fabp2	fatty acid binding protein 2, intestinal	4956.13	3240.38	492.724	384.292	0.106618	-3.22948	1.06524e-06	3.48406e-05
ENSMUSG00000072568	Fam84b	family with sequence similarity 84, member B	611.493	534.331	53.2145	69.7628	0.106939	-3.22514	4.99813e-21	8.34514e-19
ENSMUSG00000040706	Agmat	agmatine ureohydrolase (agmatinase)	5935.31	4055.85	683.131	397.193	0.10775	-3.21424	1.07718e-07	4.27222e-06
ENSMUSG00000092008	Cyp2c69	cytochrome P450, family 2, subfamily c, polypeptide 69	1307.06	989.414	190.015	59.4438	0.10826	-3.20743	3.12062e-11	2.1167e-09
ENSMUSG00000007034	Slc44a4	solute carrier family 44, member 4	66.7913	65.3804	7.12866	7.24725	0.108382	-3.20581	1.03618e-11	7.80117e-10
ENSMUSG00000037386	Rims2	regulating synaptic membrane exocytosis 2	3.59816	8.39432	0.225765	1.0872	0.109082	-3.19652	0.00926747	0.0884193
ENSMUSG00000025479	Cyp2e1	cytochrome P450, family 2, subfamily e, polypeptide 1	57958.2	37580.8	7885.75	2587.27	0.109246	-3.19434	8.12207e-06	0.000223413
ENSMUSG00000062410	Hsd3b3	hydroxy-delta-5-steroid dehydrogenase, 3 beta- and steroid delta-isomerase 3	6451.16	5130.91	745.916	535.685	0.110266	-3.18095	1.01423e-18	1.41613e-16
ENSMUSG00000091705	H2-Q2	histocompatibility 2, Q region locus 2	116.183	109.323	10.6918	14.3022	0.110436	-3.17872	2.68659e-11	1.8539e-09
ENSMUSG00000086010	Gm15318	predicted gene 15318	456.904	355.457	55.8027	34.3719	0.110616	-3.17636	1.3263e-14	1.32497e-12
ENSMUSG00000040471	Ggt6	gamma-glutamyltransferase 6	77.45	48.9688	9.68392	4.35253	0.110647	-3.17597	2.18439e-05	0.000544409
ENSMUSG00000040564	Apoc1	apolipoprotein C-I	247711	162326	30929.7	14929.2	0.111453	-3.16549	2.9259e-06	8.75423e-05
ENSMUSG00000021091	Serpina3n	serine (or cysteine) peptidase inhibitor, clade A, member 3N	30709.5	31095.6	4865.31	2050.76	0.111523	-3.16458	1.3174e-19	2.00346e-17
ENSMUSG00000038552	Fndc4	fibronectin type III domain containing 4	530.085	415.35	51.7168	54.5537	0.112001	-3.15842	2.69029e-17	3.36301e-15
ENSMUSG00000025197	Cyp2c44	cytochrome P450, family 2, subfamily c, polypeptide 44	3021.76	2486.54	382.978	236.244	0.112025	-3.1581	2.0114e-19	3.0204e-17
ENSMUSG00000040808	S100g	S100 calcium binding protein G	1106.02	1126.45	204.832	46.7146	0.112306	-3.15449	2.24286e-15	2.45645e-13
ENSMUSG00000031594	Fgl1	fibrinogen-like protein 1	17398.9	15533.9	1982.11	1736.17	0.112507	-3.15192	2.22841e-20	3.52355e-18
ENSMUSG00000063730	Hsd3b2	hydroxy-delta-5-steroid dehydrogenase, 3 beta- and steroid delta-isomerase 2	492.623	417.037	59.5006	43.7563	0.113114	-3.14415	2.17655e-17	2.74959e-15
ENSMUSG00000032091	Tmprss4	transmembrane protease, serine 4	23.2222	31.4523	3.0052	3.216	0.113388	-3.14066	4.98634e-06	0.000143094
ENSMUSG00000046408	1700067K01Rik	RIKEN cDNA 1700067K01 gene	73.0709	61.2303	8.74855	6.6086	0.113947	-3.13356	1.34305e-07	5.18878e-06
ENSMUSG00000040584	Abcb1a	ATP-binding cassette, sub-family B (MDR/TAP), member 1A	235.548	368.846	31.5741	37.7428	0.114287	-3.12927	2.29439e-06	7.02317e-05
ENSMUSG00000063415	Cyp26b1	cytochrome P450, family 26, subfamily b, polypeptide 1	85.3298	105.402	6.82167	15.1478	0.114765	-3.12325	3.85287e-17	4.76638e-15
ENSMUSG00000042289	Hsd3b7	hydroxy-delta-5-steroid dehydrogenase, 3 beta- and steroid delta-isomerase 7	28423.7	21877.7	3620.72	2177.91	0.114876	-3.12185	6.69746e-14	6.27092e-12
ENSMUSG00000047040	Prr15l	proline rich 15-like	181.759	110.444	21.1964	12.4989	0.114909	-3.12143	7.16292e-05	0.00156327
ENSMUSG00000016942	Tmprss6	transmembrane serine protease 6	8131.18	6005.22	1005.83	635.128	0.115674	-3.11186	6.73541e-11	4.38187e-09
ENSMUSG00000037169	Mycn	v-myc myelocytomatosis viral related oncogene, neuroblastoma derived (avian)	42.5944	29.5712	1.91728	6.49724	0.116156	-3.10586	5.72441e-08	2.38112e-06
ENSMUSG00000030513	Pcsk6	proprotein convertase subtilisin/kexin type 6	2003.64	1872.61	275.021	179.712	0.116906	-3.09658	6.88854e-19	9.96793e-17
ENSMUSG00000044976	Wdr72	WD repeat domain 72	6.45999	8.28895	0.835991	0.894629	0.116927	-3.09632	0.00707303	0.0727285
ENSMUSG00000055730	Ces2a	carboxylesterase 2A	4628.91	2939.44	509.743	378.464	0.116941	-3.09615	9.75439e-06	0.000263159
ENSMUSG00000048772	Tmem53	transmembrane protein 53	1289.37	858.966	141.523	111.25	0.117242	-3.09244	7.52161e-07	2.57982e-05
ENSMUSG00000036570	Fxyd1	FXYD domain-containing ion transport regulator 1	9945.3	4980.29	1181.45	574.949	0.117263	-3.09218	0.00441666	0.0503352
ENSMUSG00000087173	Gm11337	predicted gene 11337	88.2994	55.6556	14.4339	2.5744	0.117756	-3.08613	0.00124752	0.0182959
ENSMUSG00000022514	Il1rap	interleukin 1 receptor accessory protein	1392.18	1229.77	177.233	132.639	0.11777	-3.08595	6.56991e-19	9.62351e-17
ENSMUSG00000026715	Serpinc1	serine (or cysteine) peptidase inhibitor, clade C (antithrombin), member 1	65481.9	48841	9176.07	4398.88	0.118333	-3.07908	1.02043e-10	6.44542e-09
ENSMUSG00000022218	Tgm1	transglutaminase 1, K polypeptide	412.42	340.903	35.1015	54.8059	0.118912	-3.07204	2.91608e-18	3.93358e-16
ENSMUSG00000068587	Mgam	maltase-glucoamylase	346.982	498.383	39.0858	62.2093	0.119397	-3.06616	7.45667e-09	3.53947e-07
ENSMUSG00000066154	Mup3	major urinary protein 3	49.7929	52.532	4.00943	8.27485	0.119612	-3.06357	2.31199e-06	7.04995e-05
ENSMUSG00000026922	Agpat2	1-acylglycerol-3-phosphate O-acyltransferase 2 (lysophosphatidic acid acyltransferase, beta)	7787.01	5622.46	1021.97	589.008	0.119719	-3.06228	2.60943e-09	1.31997e-07
ENSMUSG00000020053	Igf1	insulin-like growth factor 1	18050.4	17825.6	2006.05	2311.99	0.119931	-3.05973	6.61003e-20	1.0182e-17
ENSMUSG00000078920	Ifi47	interferon gamma inducible protein 47	1264.83	858.945	107.453	148.5	0.120076	-3.05798	1.3225e-07	5.11767e-06
ENSMUSG00000029193	Cckar	cholecystokinin A receptor	5.31532	6.8202	1.46743	0	0.120545	-3.05236	0.0055566	0.0605243
ENSMUSG00000030110	Ret	ret proto-oncogene	3.25192	2.18565	0.400793	0.257344	0.120609	-3.05159	0.00364168	0.0432797
ENSMUSG00000064342	mt-Ti	mitochondrially encoded tRNA isoleucine	1624.55	907.14	194.661	112.49	0.120895	-3.04818	0.000882311	0.0137597
ENSMUSG00000059430	Actg2	actin, gamma 2, smooth muscle, enteric	438.093	317.454	54.9758	37.1042	0.121444	-3.04164	1.44313e-09	7.57281e-08
ENSMUSG00000032098	Treh	trehalase (brush-border membrane glycoprotein)	14.4787	24.7705	4.44134	0.445581	0.12412	-3.01019	0.00102554	0.0155465
ENSMUSG00000020331	Hcn2	hyperpolarization-activated, cyclic nucleotide-gated K+ 2	27.7479	25.8553	2.9069	3.84275	0.125465	-2.99464	2.808e-08	1.20799e-06
ENSMUSG00000035852	9130017N09Rik	RIKEN cDNA 9130017N09 gene	33.4462	19.257	3.10749	3.56299	0.126105	-2.98731	0.00035701	0.00631405
ENSMUSG00000050914	Ankrd37	ankyrin repeat domain 37	163.781	217.397	31.833	16.6853	0.126857	-2.97873	1.58655e-10	9.7158e-09
ENSMUSG00000033688	1300017J02Rik	RIKEN cDNA 1300017J02 gene	25779.8	20069.7	3309.61	2533.49	0.126992	-2.9772	7.66561e-15	7.82765e-13
ENSMUSG00000028327	1300002K09Rik	RIKEN cDNA 1300002K09 gene	1541.16	1699.09	196.513	216.957	0.127153	-2.97536	9.20924e-19	1.30106e-16
ENSMUSG00000019232	Agxt2l1	alanine-glyoxylate aminotransferase 2-like 1	2358.4	3317.71	553.94	172.252	0.127519	-2.97121	1.31244e-07	5.09525e-06
ENSMUSG00000031147	Magix	MAGI family member, X-linked	293.047	164.527	37.8907	20.9733	0.128191	-2.96363	0.000930364	0.014322
ENSMUSG00000025492	Ifitm3	interferon induced transmembrane protein 3	13426.2	8418.75	1247.28	1576.02	0.12877	-2.95713	1.88287e-05	0.000477741
ENSMUSG00000086040	Wipf3	WAS/WASL interacting protein family, member 3	70.1017	89.468	12.5487	8.09884	0.128953	-2.95508	1.95956e-13	1.75889e-11
ENSMUSG00000078922	Tgtp1	T cell specific GTPase 1	177.286	228.351	9.84515	42.8954	0.129533	-2.94861	7.74518e-12	5.90811e-10
ENSMUSG00000035578	Iqcg	IQ motif containing G	411.285	243.43	35.8415	49.4786	0.129836	-2.94523	0.000149667	0.00294353
ENSMUSG00000023959	Clic5	chloride intracellular channel 5	41.64	71.4657	7.50522	7.34602	0.130852	-2.934	0.000173511	0.00334633
ENSMUSG00000004558	Ndrg2	N-myc downstream regulated gene 2	19419.9	13466.6	3081.22	1253.26	0.131349	-2.92853	7.9405e-07	2.70067e-05
ENSMUSG00000055254	Ntrk2	neurotrophic tyrosine kinase, receptor, type 2	17.4286	17.1364	2.00484	2.55237	0.131372	-2.92827	4.43885e-10	2.55378e-08
ENSMUSG00000031285	Dcx	doublecortin	18.7395	24.8887	2.21236	3.55131	0.131636	-2.92538	1.95011e-07	7.34398e-06
ENSMUSG00000079563	Pglyrp2	peptidoglycan recognition protein 2	4933.63	4769.32	839.55	448.642	0.132308	-2.91802	3.79944e-17	4.72476e-15
ENSMUSG00000015890	Amdhd1	amidohydrolase domain containing 1	3993.43	3073.33	564.116	380.449	0.133195	-2.90839	6.21963e-13	5.26595e-11
ENSMUSG00000019122	Ccl9	chemokine (C-C motif) ligand 9	2906.99	2112.66	402.79	271.091	0.133777	-2.9021	3.0695e-09	1.53965e-07
ENSMUSG00000075010	AW112010	expressed sequence AW112010	3481.81	2398.54	306.115	483.581	0.133799	-2.90186	1.26158e-07	4.91378e-06
ENSMUSG00000035561	Aldh1b1	aldehyde dehydrogenase 1 family, member B1	6346.62	7375.89	1296.64	554.617	0.134454	-2.89482	8.10536e-17	9.87366e-15
ENSMUSG00000084983	Gm11789	predicted gene 11789	1205.67	735.66	143.143	119.483	0.134797	-2.89114	9.62002e-05	0.00201657
ENSMUSG00000044770	Scml4	sex comb on midleg-like 4 (Drosophila)	38.8467	71.5724	4.4686	10.4837	0.134927	-2.88975	0.000821264	0.0129944
ENSMUSG00000013418	B4galnt2	beta-1,4-N-acetyl-galactosaminyl transferase 2	14.4656	13.1474	3.744	0	0.135159	-2.88727	0.00260745	0.033381
ENSMUSG00000034780	B3galt1	UDP-Gal:betaGlcNAc beta 1,3-galactosyltransferase, polypeptide 1	511.664	758.381	112.09	60.7836	0.135659	-2.88194	1.35163e-06	4.32593e-05
ENSMUSG00000042988	Notum	notum pectinacetylesterase homolog (Drosophila)	785.434	487.86	92.3251	81.1103	0.135721	-2.88128	5.07258e-05	0.00115126
ENSMUSG00000025934	Gsta3	glutathione S-transferase, alpha 3	42874.5	23092.7	6504.86	2487.91	0.13585	-2.87992	0.00312559	0.0384872
ENSMUSG00000025497	Cdhr5	cadherin-related family member 5	322.334	200.378	47.0612	24.2172	0.135887	-2.87952	9.91734e-05	0.0020662
ENSMUSG00000022546	Gpt	glutamic pyruvic transaminase, soluble	723.685	408.132	96.4556	58.1852	0.136148	-2.87675	0.00100836	0.0153347
ENSMUSG00000063428	Ddo	D-aspartate oxidase	169.698	159.367	19.5206	25.5852	0.136579	-2.87219	1.23018e-14	1.23932e-12
ENSMUSG00000086165	Gm15690	predicted gene 15690	36.0384	49.3244	3.731	7.9854	0.136756	-2.87032	0.00267991	0.0339987
ENSMUSG00000017167	Cntnap1	contactin associated protein-like 1	72.4357	104.725	10.2101	14.1288	0.136897	-2.86884	6.38776e-08	2.63865e-06
ENSMUSG00000056399	Prss34	protease, serine, 34	53.7731	38.3319	1.32549	11.3477	0.137058	-2.86714	8.56678e-07	2.87927e-05
ENSMUSG00000032271	Nnmt	nicotinamide N-methyltransferase	145.757	196.963	28.4305	18.7229	0.137117	-2.86652	3.04987e-09	1.53302e-07
ENSMUSG00000037034	Pax1	paired box gene 1	16.2702	8.69862	1.75462	1.68992	0.137453	-2.86299	0.00413198	0.0478213
ENSMUSG00000028536	2610528J11Rik	RIKEN cDNA 2610528J11 gene	878.605	498.427	126.863	63.1289	0.137489	-2.86261	0.00111602	0.0166956
ENSMUSG00000067599	Klra7	killer cell lectin-like receptor, subfamily A, member 7	14.7082	12.5816	0.507571	3.25904	0.137492	-2.86258	0.00699077	0.0721312
ENSMUSG00000000753	Serpinf1	serine (or cysteine) peptidase inhibitor, clade F, member 1	44685.5	31935.1	6303.65	4391.05	0.139088	-2.84593	2.3997e-08	1.03796e-06
ENSMUSG00000027871	Hsd3b1	hydroxy-delta-5-steroid dehydrogenase, 3 beta- and steroid delta-isomerase 1	1615.12	1182.24	222.948	168.023	0.139271	-2.84404	1.50479e-09	7.86302e-08
ENSMUSG00000061740	Cyp2d22	cytochrome P450, family 2, subfamily d, polypeptide 22	2058.58	1557.64	308.864	197.632	0.139572	-2.84092	4.03359e-11	2.71284e-09
ENSMUSG00000028024	Enpep	glutamyl aminopeptidase	546.83	845.648	87.8172	107.308	0.139637	-2.84025	4.68771e-06	0.000135501
ENSMUSG00000039620	6430573F11Rik	RIKEN cDNA 6430573F11 gene	179.145	141.568	19.7242	25.5183	0.140557	-2.83077	1.49172e-12	1.21144e-10
ENSMUSG00000021795	Sftpd	surfactant associated protein D	46.964	41.178	7.29317	5.20315	0.14128	-2.82338	4.90903e-06	0.000141045
ENSMUSG00000034591	Slc41a2	solute carrier family 41, member 2	1074.73	1125.55	146.448	165.53	0.141286	-2.82331	5.86277e-15	6.11265e-13
ENSMUSG00000032278	Paqr5	progestin and adipoQ receptor family member V	5.64932	7.65147	1.62463	0.260787	0.141298	-2.82319	0.00313311	0.03854
ENSMUSG00000073155	1810058I24Rik	RIKEN cDNA 1810058I24 gene	10900.5	6138.84	1189.22	1260.03	0.143218	-2.80372	0.000843607	0.0132687
ENSMUSG00000060371	Caln1	calneuron 1	173.073	95.2725	19.0794	19.5299	0.143356	-2.80233	0.00140423	0.0201896
ENSMUSG00000028415	Spink4	serine peptidase inhibitor, Kazal type 4	251.106	141.768	53.7264	2.78201	0.143362	-2.80227	0.00604107	0.0643052
ENSMUSG00000086494	2210417A02Rik	RIKEN cDNA 2210417A02 gene	70.7663	58.1131	10.7453	7.84021	0.143702	-2.79884	0.000188889	0.00360216
ENSMUSG00000037797	Adh4	alcohol dehydrogenase 4 (class II), pi polypeptide	414.415	396.653	81.1693	35.986	0.143955	-2.79631	2.36304e-11	1.65454e-09
ENSMUSG00000005803	Sqrdl	sulfide quinone reductase-like (yeast)	9219.29	5346.8	1110.78	993.939	0.143974	-2.79612	0.000502322	0.00852413
ENSMUSG00000060807	Serpina6	serine (or cysteine) peptidase inhibitor, clade A, member 6	9217.3	4920.92	1601.11	442.426	0.144046	-2.7954	0.00548591	0.0600007
ENSMUSG00000057933	Gsta2	glutathione S-transferase, alpha 2 (Yc2)	27.9436	27.3181	6.888	1.10567	0.14418	-2.79406	0.00410362	0.0476083
ENSMUSG00000022615	Tymp	thymidine phosphorylase	807.09	572.715	120.535	79.5952	0.144533	-2.79053	8.68108e-08	3.51901e-06
ENSMUSG00000030972	Acsm5	acyl-CoA synthetase medium-chain family member 5	630.298	608.87	109.315	70.5483	0.144646	-2.7894	2.53878e-15	2.76785e-13
ENSMUSG00000046794	Ppp1r3b	protein phosphatase 1, regulatory (inhibitor) subunit 3B	997.559	1011.01	174.106	118.311	0.145081	-2.78507	5.88594e-16	6.75638e-14
ENSMUSG00000064065	Ipcef1	interaction protein for cytohesin exchange factors 1	273.361	383.047	30.996	65.6191	0.146654	-2.76951	1.49937e-08	6.72914e-07
ENSMUSG00000041550	Serpina5	serine (or cysteine) peptidase inhibitor, clade A, member 5	6.48091	11.0877	0.994012	1.5956	0.146878	-2.76731	0.00307981	0.03812
ENSMUSG00000046598	Bdh1	3-hydroxybutyrate dehydrogenase, type 1	40948.8	32643.4	5402.5	5488.35	0.14746	-2.76161	1.76864e-16	2.1009e-14
ENSMUSG00000024892	Pcx	pyruvate carboxylase	8930.15	8568.78	1624.19	982.826	0.148468	-2.75177	8.06861e-16	9.21752e-14
ENSMUSG00000040026	Saa3	serum amyloid A 3	316.649	341.091	41.4836	56.8452	0.148959	-2.74701	2.15306e-10	1.28516e-08
ENSMUSG00000026435	Slc45a3	solute carrier family 45, member 3	703.319	671.186	116.618	88.9186	0.149013	-2.74649	3.02294e-15	3.26587e-13
ENSMUSG00000031444	F10	coagulation factor X	26012.1	19386.3	4384.5	2407.52	0.14909	-2.74575	2.46129e-09	1.25033e-07
ENSMUSG00000000308	Ckmt1	creatine kinase, mitochondrial 1, ubiquitous	175.927	97.0905	16.9731	24.1017	0.149891	-2.73801	0.00145861	0.0208163
ENSMUSG00000061013	Mkx	mohawk homeobox	64.6894	73.7816	8.92959	11.9449	0.150212	-2.73493	1.2675e-05	0.000335136
ENSMUSG00000026874	Hc	hemolytic complement	62125.5	86101.5	12976.7	9388.5	0.150368	-2.73343	9.5679e-09	4.42719e-07
ENSMUSG00000019027	Dnahc1	dynein, axonemal, heavy chain 1	2.78183	2.58654	0.208695	0.602999	0.150634	-2.73088	0.000113905	0.00232642
ENSMUSG00000023224	Serping1	serine (or cysteine) peptidase inhibitor, clade G, member 1	11992	9611.05	1706.66	1560.13	0.150681	-2.73043	5.81406e-16	6.70611e-14
ENSMUSG00000011034	Slc5a1	solute carrier family 5 (sodium/glucose cotransporter), member 1	9.1	10.0547	1.43933	1.47028	0.151365	-2.72389	9.14662e-05	0.00193603
ENSMUSG00000028943	Espn	espin	79.533	84.1916	10.6355	14.3186	0.151869	-2.7191	4.97649e-09	2.42487e-07
ENSMUSG00000048939	Atp13a5	ATPase type 13A5	11.1723	13.3797	1.92775	1.85667	0.1536	-2.70275	1.60909e-05	0.000414889
ENSMUSG00000023176	Cpn2	carboxypeptidase N, polypeptide 2	2654.78	2539.44	558.834	242.562	0.153763	-2.70122	7.67159e-15	7.82765e-13
ENSMUSG00000022871	Fetub	fetuin beta	25675.1	16473.1	4274.63	2237.18	0.153959	-2.69938	7.27941e-05	0.00158724
ENSMUSG00000062209	Erbb4	v-erb-a erythroblastic leukemia viral oncogene homolog 4 (avian)	24.8133	33.3546	5.87173	3.1418	0.154435	-2.69493	5.23095e-06	0.000149574
ENSMUSG00000040170	Fmo2	flavin containing monooxygenase 2	808.009	840.339	112.288	144.025	0.15494	-2.69022	2.17708e-14	2.13909e-12
ENSMUSG00000001225	Slc26a3	solute carrier family 26, member 3	14.294	20.3789	4.11066	1.3197	0.156103	-2.67943	0.00337911	0.0409126
ENSMUSG00000027072	Prg3	proteoglycan 3	352.743	176.947	42.0794	41.0103	0.156294	-2.67767	0.00744603	0.075459
ENSMUSG00000070473	Cldn3	claudin 3	4675.5	2526.44	723.158	411.751	0.157028	-2.67091	0.00382771	0.0449535
ENSMUSG00000032349	Elovl5	ELOVL family member 5, elongation of long chain fatty acids (yeast)	47235.3	40178.2	8519.87	5256.67	0.157055	-2.67066	6.03061e-15	6.2603e-13
ENSMUSG00000032246	Calml4	calmodulin-like 4	1492.85	1245	243.994	187.649	0.157104	-2.67021	8.18985e-14	7.5791e-12
ENSMUSG00000005202	Shbg	sex hormone binding globulin	54.5719	48.0153	10.2233	6.04603	0.158042	-2.66162	3.69935e-05	0.000868492
ENSMUSG00000047631	Apof	apolipoprotein F	34697.8	24500.9	5985.62	3434.05	0.158565	-2.65686	5.91878e-07	2.06604e-05
ENSMUSG00000022512	Cldn1	claudin 1	4104.31	4031.37	739.627	557.241	0.15885	-2.65427	4.12895e-15	4.38146e-13
ENSMUSG00000054072	Iigp1	interferon inducible GTPase 1	4382.02	4421.9	646.951	758.943	0.15912	-2.65181	9.71097e-16	1.10409e-13
ENSMUSG00000068417	Pnp2	purine-nucleoside phosphorylase 2	76.0273	106.774	10.573	18.8576	0.16042	-2.64007	4.77507e-08	1.99666e-06
ENSMUSG00000040963	Asgr2	asialoglycoprotein receptor 2	8788.38	5616.79	1402.73	932.015	0.161505	-2.63035	7.5806e-05	0.00164242
ENSMUSG00000059852	Kcng2	potassium voltage-gated channel, subfamily G, member 2	7.74281	6.15022	1.336	0.919101	0.161751	-2.62816	0.00658301	0.0686958
ENSMUSG00000020323	Prss57	protease, serine 57	10.0886	10.199	1.26601	2.03222	0.161984	-2.62608	0.00744116	0.0754417
ENSMUSG00000030268	Bcat1	branched chain aminotransferase 1, cytosolic	20.1951	18.8456	1.26713	5.08504	0.162091	-2.62512	0.00670857	0.0697318
ENSMUSG00000039783	Kmo	kynurenine 3-monooxygenase (kynurenine 3-hydroxylase)	3154.53	3215.29	690.473	346.293	0.162208	-2.62408	3.71504e-14	3.62042e-12
ENSMUSG00000058022	9530008L14Rik	RIKEN cDNA 9530008L14 gene	3326.55	2536.78	605.03	350.441	0.16239	-2.62246	4.42189e-10	2.55017e-08
ENSMUSG00000035864	Syt1	synaptotagmin I	97.4663	85.8024	13.3887	16.512	0.162565	-2.62091	2.51073e-11	1.74262e-09
ENSMUSG00000025813	Homer2	homer homolog 2 (Drosophila)	80.8849	80.3381	14.0298	12.3198	0.162862	-2.61828	2.09806e-13	1.87616e-11
ENSMUSG00000027249	F2	coagulation factor II	67533.8	51110.6	11545.8	7875.46	0.163118	-2.61601	3.80297e-10	2.20924e-08
ENSMUSG00000021928	Ebpl	emopamil binding protein-like	2831.13	1627.99	409.479	321.384	0.163317	-2.61426	0.00118002	0.0174669
ENSMUSG00000037942	Crp	C-reactive protein, pentraxin-related	8272.99	7945.06	1833.59	824.838	0.163362	-2.61386	4.29305e-14	4.1331e-12
ENSMUSG00000030670	Cyp2r1	cytochrome P450, family 2, subfamily r, polypeptide 1	337.102	313.437	55.6371	51.4206	0.163986	-2.60835	4.347e-11	2.90725e-09
ENSMUSG00000074272	Ceacam1	carcinoembryonic antigen-related cell adhesion molecule 1	459.068	645.087	108.386	73.5272	0.164192	-2.60654	1.24851e-07	4.87881e-06
ENSMUSG00000039878	Slc39a5	solute carrier family 39 (metal ion transporter), member 5	1564.71	1107.33	264.295	178.837	0.165256	-2.59722	4.3697e-07	1.55024e-05
ENSMUSG00000040998	Npnt	nephronectin	302.812	476.725	84.806	45.1223	0.166117	-2.58973	9.90891e-05	0.0020662
ENSMUSG00000037406	Htra4	HtrA serine peptidase 4	11.3363	18.3171	2.1734	2.79101	0.166827	-2.58357	0.00608725	0.0646527
ENSMUSG00000008461	Fut1	fucosyltransferase 1	28.3614	14.4532	4.16483	3.00845	0.166943	-2.58257	0.00934451	0.0889318
ENSMUSG00000023914	Mep1a	meprin 1 alpha	34.6593	28.8467	8.08158	2.59453	0.167546	-2.57737	7.47481e-05	0.00162244
ENSMUSG00000029162	Khk	ketohexokinase	11555.3	7181.3	1855.71	1299.42	0.167797	-2.57521	0.000223262	0.00420394
ENSMUSG00000055172	C1ra	complement component 1, r subcomponent A	2725.49	2411.3	506.993	358.324	0.167867	-2.57461	4.37591e-14	4.19596e-12
ENSMUSG00000036813	Entpd8	ectonucleoside triphosphate diphosphohydrolase 8	1504.64	1342.18	316.532	163.422	0.168014	-2.57334	2.44462e-13	2.1698e-11
ENSMUSG00000027495	2010011I20Rik	RIKEN cDNA 2010011I20 gene	3316.88	2584.72	448.438	548.403	0.168299	-2.5709	4.52617e-13	3.90604e-11
ENSMUSG00000075225	Ccdc162	coiled-coil domain containing 162	105.516	82.2108	19.482	12.2858	0.168633	-2.56804	2.22522e-09	1.14011e-07
ENSMUSG00000043931	Gimap7	GTPase, IMAP family member 7	36.8052	39.8793	5.50388	7.47569	0.168653	-2.56787	3.77084e-05	0.000884405
ENSMUSG00000031640	Klkb1	kallikrein B, plasma 1	429.758	259.309	62.2072	55.629	0.170394	-2.55306	0.000426574	0.0073857
ENSMUSG00000030111	A2m	alpha-2-macroglobulin	92.3447	185.648	19.0976	28.4396	0.170403	-2.55298	0.00615464	0.0651438
ENSMUSG00000068221	Pdxp	pyridoxal (pyridoxine, vitamin B6) phosphatase	35.0118	24.6252	5.90695	4.30996	0.170713	-2.55036	2.43587e-05	0.000598342
ENSMUSG00000029269	Sult1b1	sulfotransferase family 1B, member 1	255.291	209.685	43.3277	37.0935	0.172345	-2.53663	5.79223e-12	4.4468e-10
ENSMUSG00000038527	C1rl	complement component 1, r subcomponent-like	1951.5	2005.6	361.627	323.48	0.172526	-2.53512	4.03724e-14	3.91842e-12
ENSMUSG00000021453	Gadd45g	growth arrest and DNA-damage-inducible 45 gamma	1405.52	782.253	232.796	146.264	0.172649	-2.53408	0.00325515	0.0397138
ENSMUSG00000078817	Nlrp12	NLR family, pyrin domain containing 12	131.267	172.584	37.4806	15.3399	0.173259	-2.529	1.92103e-08	8.4781e-07
ENSMUSG00000015968	Cacna1d	calcium channel, voltage-dependent, L type, alpha 1D subunit	15.9777	13.217	2.36306	2.72334	0.173597	-2.52618	5.27112e-08	2.20023e-06
ENSMUSG00000026822	Lcn2	lipocalin 2	3972.15	4417.19	489.839	971.92	0.173605	-2.52612	5.24181e-15	5.51337e-13
ENSMUSG00000022219	Cideb	cell death-inducing DNA fragmentation factor, alpha subunit-like effector B	2375.24	1860.92	492.321	245.938	0.173675	-2.52554	2.10168e-10	1.26079e-08
ENSMUSG00000049721	Gal3st1	galactose-3-O-sulfotransferase 1	193.161	116.5	40.241	13.8067	0.17394	-2.52334	0.00164231	0.0229846
ENSMUSG00000071177	Serpina1d	serine (or cysteine) peptidase inhibitor, clade A, member 1D	50198.1	38070.7	8825.15	6622.84	0.174394	-2.51958	4.66646e-10	2.67186e-08
ENSMUSG00000042251	Pm20d1	peptidase M20 domain containing 1	1913.23	1790.99	350.818	299.285	0.174886	-2.51551	1.8329e-13	1.65141e-11
ENSMUSG00000021871	Pnp	purine-nucleoside phosphorylase	3489	2749.42	578.747	520.946	0.175651	-2.50922	1.59273e-13	1.45145e-11
ENSMUSG00000037053	Azgp1	alpha-2-glycoprotein 1, zinc	32900	28306.2	7625.06	3226.71	0.176695	-2.50067	5.5021e-13	4.69172e-11
ENSMUSG00000054065	Pkp3	plakophilin 3	96.4313	80.3179	20.1419	11.2459	0.17697	-2.49842	6.73342e-05	0.00148036
ENSMUSG00000049502	Dtx3l	deltex 3-like (Drosophila)	586.194	913.502	122.078	145.02	0.177478	-2.49429	3.45768e-05	0.000815767
ENSMUSG00000050520	Cldn8	claudin 8	9.25128	16.3926	2.73649	1.83027	0.177484	-2.49424	0.00212279	0.0283625
ENSMUSG00000020068	Pbld2	phenazine biosynthesis-like protein domain containing 2	4486.77	3040.87	811.287	530.487	0.177619	-2.49314	1.351e-05	0.00035564
ENSMUSG00000034371	Dak	dihydroxyacetone kinase 2 homolog (yeast)	7420.12	7885.92	1515.93	1216.12	0.177873	-2.49108	9.00121e-14	8.2978e-12
ENSMUSG00000020173	Cobl	cordon-bleu	182.492	238.514	33.3805	42.0853	0.178617	-2.48506	1.64554e-11	1.19688e-09
ENSMUSG00000038539	Atf5	activating transcription factor 5	19215.6	11861.3	3416.69	2154.84	0.17865	-2.48479	0.000450641	0.00774065
ENSMUSG00000000303	Cdh1	cadherin 1	2551.34	2742.1	468.994	481.158	0.178863	-2.48308	6.0568e-14	5.73858e-12
ENSMUSG00000029630	Cyp3a25	cytochrome P450, family 3, subfamily a, polypeptide 25	6916.45	5115.23	1829.72	329.73	0.178885	-2.4829	3.14738e-05	0.000753499
ENSMUSG00000026188	Tmem169	transmembrane protein 169	12.8843	23.5124	1.77853	4.75819	0.178947	-2.4824	0.00246713	0.032101
ENSMUSG00000034450	Gulo	gulonolactone (L-) oxidase	12338	9125.34	2455.05	1403.48	0.179147	-2.48078	7.37814e-08	3.01129e-06
ENSMUSG00000035540	Gc	group specific component	158590	126933	29566.1	21820.4	0.179341	-2.47922	2.14722e-13	1.91295e-11
ENSMUSG00000067225	Cyp2c54	cytochrome P450, family 2, subfamily c, polypeptide 54	130.252	93.3511	32.497	7.80032	0.179614	-2.47703	4.22468e-05	0.000975516
ENSMUSG00000045094	Arhgef37	Rho guanine nucleotide exchange factor (GEF) 37	32.254	37.4737	5.64841	6.93352	0.179803	-2.47551	1.57461e-07	6.00565e-06
ENSMUSG00000032864	Rag2	recombination activating gene 2	12.9714	14.122	1.62776	3.26613	0.179971	-2.47416	0.000296723	0.00537117
ENSMUSG00000040350	Trim7	tripartite motif-containing 7	99.2639	80.1944	14.9868	17.5654	0.180738	-2.46803	3.75814e-09	1.8616e-07
ENSMUSG00000027442	Cst8	cystatin 8 (cystatin-related epididymal spermatogenic)	28.3802	43.3515	6.29606	6.73768	0.181069	-2.46539	0.00153399	0.021775
ENSMUSG00000028786	Tmem54	transmembrane protein 54	36.4177	23.3642	8.37838	2.5217	0.181711	-2.46028	0.0024211	0.0316297
ENSMUSG00000027048	Abcb11	ATP-binding cassette, sub-family B (MDR/TAP), member 11	3207.54	4024.19	1031.57	294.358	0.182747	-2.45208	3.83758e-08	1.6217e-06
ENSMUSG00000071335	G630090E17Rik	RIKEN cDNA G630090E17 gene	181.212	196	38.4834	30.887	0.183262	-2.44802	3.03092e-10	1.77859e-08
ENSMUSG00000025014	Dntt	deoxynucleotidyltransferase, terminal	46.0082	45.069	8.19468	8.63245	0.184101	-2.44143	1.04154e-06	3.42533e-05
ENSMUSG00000003585	Sec14l2	SEC14-like 2 (S, cerevisiae)	17050.9	14925.3	4148.83	1789.46	0.185078	-2.4338	2.19621e-12	1.75962e-10
ENSMUSG00000075517	Cyp2d37-ps	cytochrome P450, family 2, subfamily d, polypeptide 37, pseudogene	1601.72	1525.88	390.654	191.487	0.185496	-2.43054	2.53291e-11	1.75292e-09
ENSMUSG00000026189	Pecr	peroxisomal trans-2-enoyl-CoA reductase	7203.12	4801.34	1229.53	1006.16	0.185574	-2.42993	2.55486e-05	0.000623719
ENSMUSG00000052435	Cebpe	CCAAT/enhancer binding protein (C/EBP), epsilon	93.0594	95.7403	10.8494	24.3819	0.18592	-2.42725	8.82419e-08	3.57096e-06
ENSMUSG00000046811	Gltpd2	glycolipid transfer protein domain containing 2	1764.44	1295.98	366.195	205.952	0.1863	-2.4243	2.63272e-07	9.73048e-06
ENSMUSG00000047330	Kcne4	potassium voltage-gated channel, Isk-related subfamily, gene 4	23.3971	29.21	4.58267	5.2544	0.186332	-2.42405	1.33656e-05	0.000352616
ENSMUSG00000042770	Hebp1	heme binding protein 1	6180.48	3780.64	1197.58	666.528	0.186482	-2.42289	0.000868226	0.0135755
ENSMUSG00000047638	Nr1h4	nuclear receptor subfamily 1, group H, member 4	1628.23	1437.76	325.335	248.517	0.186511	-2.42267	1.44209e-12	1.17513e-10
ENSMUSG00000047797	Gjb1	gap junction protein, beta 1	15670	9483.14	2723.74	1988.26	0.186666	-2.42147	0.000773838	0.0123257
ENSMUSG00000029032	Arhgef16	Rho guanine nucleotide exchange factor (GEF) 16	179.976	157.184	33.8776	29.2819	0.186666	-2.42147	1.76644e-10	1.07317e-08
ENSMUSG00000031112	2610018G03Rik	RIKEN cDNA 2610018G03 gene	180.529	229.566	23.4321	53.7335	0.187479	-2.4152	6.45315e-11	4.20971e-09
ENSMUSG00000085192	Gm12195	predicted gene 12195	46.4734	42.5935	5.72776	11.0331	0.187492	-2.4151	0.0054062	0.0593464
ENSMUSG00000040728	Esrp1	epithelial splicing regulatory protein 1	6.99319	9.34698	2.11165	0.96847	0.187869	-2.4122	0.00228133	0.0301767
ENSMUSG00000032028	Fam55b	family with sequence similarity 55, member B	1327.16	1560.35	259.565	286.088	0.188303	-2.40887	1.08404e-12	9.01827e-11
ENSMUSG00000024338	Psmb8	proteasome (prosome, macropain) subunit, beta type 8 (large multifunctional peptidase 7)	1086.36	918.651	148.837	230.968	0.188737	-2.40555	6.67046e-13	5.6277e-11
ENSMUSG00000033213	AA467197	expressed sequence AA467197	51.325	45.9948	0.843428	17.6005	0.188778	-2.40524	0.000412031	0.00718601
ENSMUSG00000037826	Ppm1k	protein phosphatase 1K (PP2C domain containing)	1057.32	1034.51	211.04	185.359	0.188833	-2.40482	7.02866e-13	5.88829e-11
ENSMUSG00000026235	Epha4	Eph receptor A4	20.9123	30.095	4.49984	5.1789	0.189087	-2.40288	1.06095e-06	3.4748e-05
ENSMUSG00000022425	Enpp2	ectonucleotide pyrophosphatase/phosphodiesterase 2	4235.42	4691.21	903.882	794.086	0.189549	-2.39936	4.53163e-13	3.90604e-11
ENSMUSG00000021751	Acox2	acyl-Coenzyme A oxidase 2, branched chain	9032.49	8061.91	2113.79	1142.58	0.189838	-2.39716	3.45016e-12	2.72768e-10
ENSMUSG00000031844	Hsd17b2	hydroxysteroid (17-beta) dehydrogenase 2	6508.4	4274.11	943.569	1114.41	0.190169	-2.39465	3.92543e-05	0.000914376
ENSMUSG00000041660	Bbox1	butyrobetaine (gamma), 2-oxoglutarate dioxygenase 1 (gamma-butyrobetaine hydroxylase)	2126.7	1523.02	449.079	249.844	0.190834	-2.38961	2.30798e-06	7.04673e-05
ENSMUSG00000039131	Gipc2	GIPC PDZ domain containing family, member 2	166.43	228.868	36.3507	39.6784	0.19166	-2.38338	5.86212e-08	2.42993e-06
ENSMUSG00000036892	Prodh2	proline dehydrogenase (oxidase) 2	31032.4	19480.7	5816.36	3902.95	0.191731	-2.38284	0.000390778	0.00683533
ENSMUSG00000029695	Aass	aminoadipate-semialdehyde synthase	7994.28	9987.15	2480.58	981.424	0.19189	-2.38165	2.1099e-09	1.08569e-07
ENSMUSG00000030739	Myh14	myosin, heavy polypeptide 14	520.757	492.695	123.668	71.9685	0.192375	-2.37801	8.61312e-11	5.46933e-09
ENSMUSG00000086141	9030622O22Rik	RIKEN cDNA 9030622O22 gene	370.415	381.183	48.0558	97.1961	0.192549	-2.3767	2.37349e-09	1.20901e-07
ENSMUSG00000024395	Lims2	LIM and senescent cell antigen like domains 2	771.973	505.721	156.278	91.4536	0.19321	-2.37176	0.000143354	0.00283337
ENSMUSG00000005681	Apoa2	apolipoprotein A-II	649818	380418	145681	55223.7	0.194336	-2.36337	0.00420607	0.0483506
ENSMUSG00000038403	Hfe2	hemochromatosis type 2 (juvenile) (human homolog)	1851.13	1467.5	457.777	189.895	0.194496	-2.36219	9.23074e-09	4.31298e-07
ENSMUSG00000030402	Ppm1n	protein phosphatase, Mg2+/Mn2+ dependent, 1N (putative)	27.6817	23.6793	2.63526	7.40277	0.194708	-2.36061	0.000175776	0.00338454
ENSMUSG00000020629	Adi1	acireductone dioxygenase 1	7535.14	4938.46	1312.52	1128.55	0.194999	-2.35846	6.93494e-05	0.00151907
ENSMUSG00000028186	Uox	urate oxidase	58961.4	63761.6	20904.8	3113.79	0.195081	-2.35786	1.24077e-07	4.85648e-06
ENSMUSG00000037010	Apln	apelin	15.8207	24.529	1.87675	6.02518	0.195117	-2.35759	0.000142298	0.00281483
ENSMUSG00000028457	Atp8b5	ATPase, class I, type 8B, member 5	19.692	14.803	2.47112	4.29724	0.19549	-2.35484	0.000179816	0.0034512
ENSMUSG00000022235	Cmbl	carboxymethylenebutenolidase-like (Pseudomonas)	4411.1	3711.55	974.861	618.695	0.195504	-2.35473	1.03902e-11	7.80117e-10
ENSMUSG00000038357	Camp	cathelicidin antimicrobial peptide	2458.33	2222.55	317.352	601.256	0.195526	-2.35457	1.20491e-12	9.95444e-11
ENSMUSG00000026304	Rab17	RAB17, member RAS oncogene family	1425.5	882.29	287.66	167.993	0.196748	-2.34558	0.000829541	0.0130817
ENSMUSG00000026870	D730039F16Rik	RIKEN cDNA D730039F16 gene	2654.34	1977.42	464.881	450.031	0.196823	-2.34503	9.31123e-09	4.3168e-07
ENSMUSG00000003309	Ap1m2	adaptor protein complex AP-1, mu 2 subunit	26.9197	20.7248	7.43189	1.98829	0.197055	-2.34333	0.00097104	0.0148619
ENSMUSG00000019987	Arg1	arginase, liver	17111.7	14167.5	5152.05	1034.21	0.197121	-2.34285	1.21808e-06	3.93543e-05
ENSMUSG00000057037	Cfhr1	complement factor H-related 1	8068.02	6773.92	1785.02	1160.64	0.197778	-2.33805	1.20117e-11	8.93434e-10
ENSMUSG00000031775	Pllp	plasma membrane proteolipid	450.821	246.752	86.4628	52.0467	0.197857	-2.33747	0.00723719	0.0738888
ENSMUSG00000040562	Gstm2	glutathione S-transferase, mu 2	1012.3	709.26	199.817	142.919	0.198382	-2.33365	4.82425e-06	0.000138776
ENSMUSG00000012350	Ehf	ets homologous factor	115.252	162.67	40.4356	14.8969	0.198437	-2.33325	2.60283e-05	0.000634782
ENSMUSG00000020027	Socs2	suppressor of cytokine signaling 2	4407.13	3209.18	586.824	932.217	0.198712	-2.33125	1.49903e-07	5.76343e-06
ENSMUSG00000030946	Lhpp	phospholysine phosphohistidine inorganic pyrophosphate phosphatase	1720.08	1437.01	451.475	178.049	0.198723	-2.33117	2.32385e-10	1.3802e-08
ENSMUSG00000040127	Sdr9c7	4short chain dehydrogenase/reductase family 9C, member 7	44.0072	48.2984	10.602	7.8193	0.198878	-2.33005	6.81285e-06	0.000189585
ENSMUSG00000022582	Ly6g	lymphocyte antigen 6 complex, locus G	83.4031	83.2349	12.792	20.5339	0.199264	-2.32725	0.00211053	0.0282144
ENSMUSG00000027954	Efna1	ephrin A1	2049.16	2547.44	516.572	404.406	0.199669	-2.32432	4.44011e-12	3.45316e-10
ENSMUSG00000006800	Sulf2	sulfatase 2	824.423	944.257	149.739	204.789	0.199732	-2.32387	1.48108e-11	1.08807e-09
ENSMUSG00000054630	Ugt2b5	UDP glucuronosyltransferase 2 family, polypeptide B5	5426.95	4243.69	1186.52	762.398	0.200825	-2.31599	3.49289e-10	2.04402e-08
ENSMUSG00000051435	Fhad1	forkhead-associated (FHA) phosphopeptide binding domain 1	30.7045	40.5915	8.18779	6.18501	0.200901	-2.31545	0.000578993	0.00964693
ENSMUSG00000026295	Spp2	secreted phosphoprotein 2	27409.4	17973	5130.57	4023.59	0.200994	-2.31478	9.81163e-05	0.00205133
ENSMUSG00000069456	Rdh16	retinol dehydrogenase 16	567.984	655.29	180.093	66.9608	0.201288	-2.31267	6.27509e-11	4.11605e-09
ENSMUSG00000045087	S1pr5	sphingosine-1-phosphate receptor 5	14.9458	12.7849	0.429811	5.17454	0.201312	-2.31249	0.000348895	0.00618888
ENSMUSG00000057103	Cml1	camello-like 1	1994.6	1170.79	376.631	263.335	0.201457	-2.31145	0.00225985	0.029959
ENSMUSG00000054764	Mtnr1a	melatonin receptor 1A	27.4256	40.6644	10.7263	3.03848	0.201499	-2.31116	0.00375834	0.0442258
ENSMUSG00000028573	Fggy	FGGY carbohydrate kinase domain containing	6618.32	5449.32	1299.61	1142.06	0.201615	-2.31033	7.68596e-12	5.88173e-10
ENSMUSG00000010122	Slc47a1	solute carrier family 47, member 1	2154.89	2332.21	603.162	304.648	0.201629	-2.31023	2.02601e-11	1.43968e-09
ENSMUSG00000035769	Xylb	xylulokinase homolog (H, influenzae)	1019.62	1063.68	272.39	149.695	0.201912	-2.3082	1.80675e-11	1.29934e-09
ENSMUSG00000000326	Comt	catechol-O-methyltransferase	6768.45	5329.73	1397.9	1053.88	0.201943	-2.30798	1.86941e-11	1.34036e-09
ENSMUSG00000042195	Slc35f2	solute carrier family 35, member F2	7.88129	12.9649	1.88293	2.35084	0.202385	-2.30483	0.00263539	0.0336305
ENSMUSG00000068101	Cenpm	centromere protein M	524.344	453.144	86.0552	112.75	0.202649	-2.30295	1.20186e-10	7.51192e-09
ENSMUSG00000063600	Egfem1	EGF-like and EMI domain containing 1	38.2312	32.7035	10.9945	3.5297	0.204066	-2.29289	0.00701668	0.072336
ENSMUSG00000028298	Cga	glycoprotein hormones, alpha subunit	24.9279	44.5858	5.4743	8.78742	0.204439	-2.29025	0.00384735	0.0451397
ENSMUSG00000031891	Hsd11b2	hydroxysteroid 11-beta dehydrogenase 2	13.5012	12.2709	2.0384	3.27206	0.205304	-2.28417	0.00497504	0.0554031
ENSMUSG00000000049	Apoh	apolipoprotein H	268600	180521	59102.9	33746.1	0.206012	-2.2792	0.00010033	0.00208484
ENSMUSG00000032363	Adamts7	a disintegrin-like and metallopeptidase (reprolysin type) with thrombospondin type 1 motif, 7	397.856	442.585	81.1363	93.5422	0.207104	-2.27157	1.03745e-11	7.80117e-10
ENSMUSG00000013846	St3gal1	ST3 beta-galactoside alpha-2,3-sialyltransferase 1	834.488	1100.67	197.338	205.528	0.207454	-2.26914	7.42063e-10	4.05435e-08
ENSMUSG00000038745	Nlrp6	NLR family, pyrin domain containing 6	1484.78	1622.29	383.238	263.938	0.207573	-2.26831	1.64058e-11	1.19688e-09
ENSMUSG00000032372	Plscr2	phospholipid scramblase 2	113.978	189.639	36.3074	27.0591	0.207997	-2.26537	0.000977254	0.0149474
ENSMUSG00000029417	Cxcl9	chemokine (C-X-C motif) ligand 9	161.313	172.372	24.5976	45.125	0.208187	-2.26405	1.32435e-10	8.21304e-09
ENSMUSG00000028076	Cd1d1	CD1d1 antigen	3487.32	2270.83	614.772	590.526	0.208567	-2.26142	0.000121847	0.00246329
ENSMUSG00000079110	Capn3	calpain 3	133.561	153.492	30.8611	29.2728	0.208753	-2.26013	1.55944e-09	8.12953e-08
ENSMUSG00000023045	Soat2	sterol O-acyltransferase 2	1349.74	814.796	221.284	233.512	0.20935	-2.25601	0.00104154	0.0157491
ENSMUSG00000032908	Sgpp2	sphingosine-1-phosphate phosphotase 2	6.23055	7.66144	1.20945	1.72571	0.21053	-2.2479	0.00279249	0.0351468
ENSMUSG00000070644	Etnk2	ethanolamine kinase 2	3274.36	2449.69	714.97	494.833	0.210612	-2.24734	8.05294e-08	3.2755e-06
ENSMUSG00000025481	1190003J15Rik	RIKEN cDNA 1190003J15 gene	7533.93	4432.59	1619.05	910.206	0.210619	-2.2473	0.00345684	0.0416215
ENSMUSG00000022651	Retnlg	resistin like gamma	652.959	477.505	84.8311	154.612	0.211026	-2.24451	4.21287e-07	1.50353e-05
ENSMUSG00000029314	Agpat9	1-acylglycerol-3-phosphate O-acyltransferase 9	349.807	289.533	58.1228	77.4506	0.211284	-2.24275	7.43506e-11	4.81083e-09
ENSMUSG00000053886	Sh2d4a	SH2 domain containing 4A	244.584	184.721	58.5099	32.682	0.21168	-2.24004	2.02221e-07	7.60352e-06
ENSMUSG00000038732	Mboat1	membrane bound O-acyltransferase domain containing 1	93.1303	82.6712	16.979	20.4412	0.21209	-2.23725	1.7443e-05	0.000444947
ENSMUSG00000052234	Epx	eosinophil peroxidase	611.207	415.403	95.9915	122.651	0.212198	-2.23651	1.94296e-05	0.000491942
ENSMUSG00000035863	Palm	paralemmin	311.974	230.289	51.1284	64.7234	0.212869	-2.23196	6.58093e-08	2.70441e-06
ENSMUSG00000026835	Fcnb	ficolin B	108.784	161.703	20.3089	37.5396	0.213101	-2.23039	2.75013e-05	0.000667298
ENSMUSG00000030630	Fah	fumarylacetoacetate hydrolase	42207.1	28098.7	10549	4526.94	0.213694	-2.22638	0.000427879	0.00739756
ENSMUSG00000036078	Sigmar1	sigma non-opioid intracellular receptor 1	8427.11	7283.57	1938.28	1431.46	0.213736	-2.2261	4.74858e-11	3.16696e-09
ENSMUSG00000084923	Gm15611	predicted gene 15611	655.721	918.454	121.744	216.668	0.214206	-2.22293	1.20341e-06	3.89332e-05
ENSMUSG00000025127	Gcgr	glucagon receptor	2832.29	2069.76	652.692	401.491	0.214298	-2.22231	1.52094e-06	4.80345e-05
ENSMUSG00000028919	Arhgef19	Rho guanine nucleotide exchange factor (GEF) 19	3693.72	3487.08	1173.39	370.725	0.214315	-2.2222	4.78122e-10	2.7245e-08
ENSMUSG00000035104	Fam176a	family with sequence similarity 176, member A	4868.14	3133.35	1047.26	678.556	0.214926	-2.21809	0.00041935	0.00727645
ENSMUSG00000048485	Zbtb8b	zinc finger and BTB domain containing 8b	23.5495	29.4111	6.98906	4.43539	0.21498	-2.21773	1.56762e-05	0.000406389
ENSMUSG00000002769	Gnmt	glycine N-methyltransferase	14726.7	10384.9	4543.72	877.025	0.215147	-2.21661	0.00100807	0.0153347
ENSMUSG00000021033	Gstz1	glutathione transferase zeta 1 (maleylacetoacetate isomerase)	16223.1	13180.8	3766.65	2588.3	0.21537	-2.21511	5.55041e-11	3.68116e-09
ENSMUSG00000039450	Dcxr	dicarbonyl L-xylulose reductase	4772.52	2685.69	924.857	690.13	0.215765	-2.21247	0.00567441	0.0614432
ENSMUSG00000020878	Lrrc46	leucine rich repeat containing 46	51.2738	37.8793	9.65144	9.68289	0.216089	-2.2103	0.000130728	0.00261412
ENSMUSG00000023886	Smoc2	SPARC related modular calcium binding 2	621.754	619.324	142.094	127.293	0.216296	-2.20892	8.27315e-11	5.28154e-09
ENSMUSG00000024747	Aldh1a7	aldehyde dehydrogenase family 1, subfamily A7	319.51	317.147	74.3743	63.8677	0.216376	-2.20839	7.37167e-10	4.03683e-08
ENSMUSG00000060459	Kng2	kininogen 2	9764.76	8817.01	2382.75	1652.43	0.216402	-2.20822	5.49533e-11	3.65477e-09
ENSMUSG00000068037	Mas1	MAS1 oncogene	17.7128	11.9619	1.28686	5.16421	0.21656	-2.20716	0.00394639	0.0460753
ENSMUSG00000049119	Fam110b	family with sequence similarity 110, member B	128.212	103.407	22.1226	28.4092	0.217378	-2.20172	5.51726e-06	0.000157196
ENSMUSG00000018924	Alox15	arachidonate 15-lipoxygenase	277.286	190.318	37.0657	64.9625	0.217385	-2.20167	2.17891e-05	0.000543611
ENSMUSG00000015970	Chdh	choline dehydrogenase	1824.71	3097.14	673.551	401.08	0.217607	-2.2002	0.00236811	0.0310771
ENSMUSG00000034127	Tspan8	tetraspanin 8	147.33	104.396	30.7333	24.3622	0.218094	-2.19698	4.51596e-06	0.000131172
ENSMUSG00000025422	Agap2	ArfGAP with GTPase domain, ankyrin repeat and PH domain 2	22.9397	43.7378	7.24872	7.34889	0.218176	-2.19643	0.00821476	0.0806761
ENSMUSG00000052563	D930048N14Rik	RIKEN cDNA D930048N14 gene	63.4614	49.5992	12.4469	12.3926	0.218915	-2.19156	1.81481e-07	6.85606e-06
ENSMUSG00000030474	Siglece	sialic acid binding Ig-like lectin E	325.854	335.641	48.2346	97.4832	0.219479	-2.18785	1.58702e-10	9.7158e-09
ENSMUSG00000040447	Spns2	spinster homolog 2 (Drosophila)	1552.44	1338.56	358.988	278.832	0.219848	-2.18542	3.73488e-10	2.17498e-08
ENSMUSG00000036833	Pnpla7	patatin-like phospholipase domain containing 7	9260.58	6867.4	1906.35	1653.68	0.219951	-2.18475	9.92969e-08	3.96811e-06
ENSMUSG00000026986	Hnmt	histamine N-methyltransferase	87.7641	86.499	18.4355	20.0809	0.220239	-2.18286	7.54194e-07	2.57982e-05
ENSMUSG00000073988	Ttpa	tocopherol (alpha) transfer protein	3932.28	3841.05	1076.71	643.573	0.220544	-2.18086	1.20967e-10	7.541e-09
ENSMUSG00000040525	Cblc	Casitas B-lineage lymphoma c	1212.51	742.643	237.664	195.375	0.220693	-2.17989	0.00121955	0.0179519
ENSMUSG00000025207	Sema4g	sema domain, immunoglobulin domain (Ig), transmembrane domain (TM) and short cytoplasmic domain, (semaphorin) 4G	2582.1	2630.72	669.099	493.219	0.222198	-2.17008	8.15636e-11	5.23498e-09
ENSMUSG00000017718	Afmid	arylformamidase	981.639	1108.5	280.954	185.576	0.222438	-2.16853	4.82623e-10	2.7436e-08
ENSMUSG00000024810	Il33	interleukin 33	410.152	396.772	57.0611	123.713	0.223203	-2.16357	5.09391e-09	2.47703e-07
ENSMUSG00000018459	Slc13a3	solute carrier family 13 (sodium-dependent dicarboxylate transporter), member 3	11556.2	9064.48	1967.51	2656.95	0.223448	-2.16199	8.25047e-11	5.28119e-09
ENSMUSG00000031373	Car5b	carbonic anhydrase 5b, mitochondrial	31.1702	29.8954	5.86728	7.84853	0.223799	-2.15972	5.56735e-06	0.000158245
ENSMUSG00000037366	Pafah2	platelet-activating factor acetylhydrolase 2	3322.34	4204.44	1135.69	561.693	0.224753	-2.15359	2.09944e-08	9.18064e-07
ENSMUSG00000041717	Golt1a	golgi transport 1 homolog A (S, cerevisiae)	722.646	554.538	179.963	108.154	0.224802	-2.15327	6.95521e-08	2.84354e-06
ENSMUSG00000078853	Igtp	interferon gamma induced GTPase	1079.26	860.7	149.272	290.926	0.226072	-2.14515	6.32996e-10	3.49039e-08
ENSMUSG00000075543	Prhoxnb	parahox cluster neighbor	923.111	963.956	247.535	180.612	0.226098	-2.14498	2.09812e-09	1.08196e-07
ENSMUSG00000026678	Rgs5	regulator of G-protein signaling 5	1510.37	1860.37	441.666	323.364	0.226181	-2.14445	1.43392e-10	8.86948e-09
ENSMUSG00000023828	Slc22a3	solute carrier family 22 (organic cation transporter), member 3	67.1481	79.8827	19.336	14.0412	0.226225	-2.14417	7.69253e-08	3.13425e-06
ENSMUSG00000079362	Gbp6	guanylate binding protein 6	77.9512	129.965	10.8349	36.3841	0.226274	-2.14386	0.00181092	0.0249495
ENSMUSG00000033427	Upb1	ureidopropionase, beta	8614.7	6479.18	2265.04	1164.92	0.226456	-2.1427	1.71475e-06	5.39411e-05
ENSMUSG00000033752	Mnd1	meiotic nuclear divisions 1 homolog (S, cerevisiae)	301.04	223.991	57.1688	62.1655	0.226471	-2.1426	1.1721e-07	4.61041e-06
ENSMUSG00000055737	Ghr	growth hormone receptor	10840.5	11052.9	2730.94	2251.56	0.226784	-2.14061	1.04356e-10	6.57417e-09
ENSMUSG00000037254	Itih2	inter-alpha trypsin inhibitor, heavy chain 2	104875	116768	27145.5	23469.7	0.227567	-2.13564	7.25128e-11	4.70466e-09
ENSMUSG00000030108	Slc6a13	solute carrier family 6 (neurotransmitter transporter, GABA), member 13	11473.3	8805.43	3014.23	1626.79	0.228069	-2.13246	2.77702e-07	1.02163e-05
ENSMUSG00000054676	1600014C10Rik	RIKEN cDNA 1600014C10 gene	5892.77	3960.92	1316.83	938.802	0.228103	-2.13224	0.000121947	0.00246329
ENSMUSG00000034917	Tjp3	tight junction protein 3	365.532	287.138	75.3306	74.1501	0.228211	-2.13156	9.87863e-10	5.30027e-08
ENSMUSG00000055413	H2-Q5	histocompatibility 2, Q region locus 5	47.5267	82.5419	13.9162	15.956	0.228867	-2.12742	0.00258694	0.0332075
ENSMUSG00000061815	Rufy4	RUN and FYVE domain containing 4	44.2993	28.9024	12.6964	4.15926	0.229478	-2.12357	0.0024366	0.0317209
ENSMUSG00000022057	Adamdec1	ADAM-like, decysin 1	147.019	164.754	31.0173	40.8984	0.229844	-2.12128	6.37445e-09	3.04393e-07
ENSMUSG00000033998	Kcnk1	potassium channel, subfamily K, member 1	18.9448	10.9967	4.66983	2.24882	0.230266	-2.11863	0.0084791	0.0826054
ENSMUSG00000044469	Tnfaip8l1	tumor necrosis factor, alpha-induced protein 8-like 1	210.722	206.565	46.0705	50.3896	0.230337	-2.11818	4.34244e-09	2.12459e-07
ENSMUSG00000049858	Suox	sulfite oxidase	2923.5	2485.49	741.968	509.597	0.230578	-2.11667	4.26187e-10	2.46383e-08
ENSMUSG00000005148	Klf5	Kruppel-like factor 5	20.8064	23.2148	4.68272	5.51229	0.230771	-2.11547	0.00136791	0.0197822
ENSMUSG00000073096	Lrrc61	leucine rich repeat containing 61	1056.29	630.925	212.579	178.257	0.230814	-2.1152	0.00251959	0.0326767
ENSMUSG00000025466	1810014F10Rik	RIKEN cDNA 1810014F10 gene	2272.17	1717.4	597.421	327.987	0.231152	-2.11309	9.71862e-07	3.21387e-05
ENSMUSG00000020258	Glyctk	glycerate kinase	2978.19	2431.08	802.289	457.543	0.232096	-2.10721	8.35446e-10	4.53052e-08
ENSMUSG00000029499	Pxmp2	peroxisomal membrane protein 2	11816.6	7787.24	2716.73	1862.42	0.232759	-2.10309	0.000312885	0.00561198
ENSMUSG00000019851	Perp	PERP, TP53 apoptosis effector	2926.17	2178.03	610.745	582.056	0.232854	-2.1025	1.07567e-07	4.27222e-06
ENSMUSG00000066442	Mthfs	5, 10-methenyltetrahydrofolate synthetase	614.1	527.256	132.648	134.813	0.233501	-2.0985	1.92047e-08	8.4781e-07
ENSMUSG00000057135	A430084P05Rik	RIKEN cDNA A430084P05 gene	82.5676	75.3381	12.6638	24.3938	0.23382	-2.09653	6.40505e-05	0.00141599
ENSMUSG00000020125	Elane	elastase, neutrophil expressed	201.376	141.861	33.871	46.8708	0.234376	-2.0931	7.98373e-06	0.000219861
ENSMUSG00000026077	Npas2	neuronal PAS domain protein 2	437.464	412.735	130.986	69.4927	0.234994	-2.08931	8.82044e-07	2.95367e-05
ENSMUSG00000026623	Lpgat1	lysophosphatidylglycerol acyltransferase 1	15226.2	19697.5	3459.16	4783.96	0.235193	-2.08808	9.2897e-10	5.00458e-08
ENSMUSG00000030643	Rab30	RAB30, member RAS oncogene family	905.768	699.978	213.606	166.228	0.235712	-2.0849	5.49912e-09	2.66322e-07
ENSMUSG00000019590	Cyb561	cytochrome b-561	291.638	250.965	74.7288	54.1735	0.236731	-2.07868	3.32396e-07	1.20796e-05
ENSMUSG00000069805	Fbp1	fructose bisphosphatase 1	103443	106037	32757.8	17047.6	0.236946	-2.07737	8.57311e-10	4.63103e-08
ENSMUSG00000049907	Rasl11b	RAS-like, family 11, member B	355.68	204.316	71.9736	61.3619	0.237245	-2.07555	0.00549887	0.0601092
ENSMUSG00000086150	BC024582	cDNA sequence BC024582	115.575	120.188	22.6793	33.8943	0.239095	-2.06435	3.29791e-05	0.000785055
ENSMUSG00000029102	Hgfac	hepatocyte growth factor activator	10051.8	8092.5	2364.68	1999.2	0.239657	-2.06095	6.0831e-10	3.36984e-08
ENSMUSG00000045284	Dcaf12l1	DDB1 and CUL4 associated factor 12-like 1	151.151	143.367	29.9162	41.1264	0.240346	-2.05682	6.07637e-09	2.91324e-07
ENSMUSG00000025574	Tk1	thymidine kinase 1	2824.53	2751.62	628.175	719.783	0.240874	-2.05365	5.69378e-10	3.1969e-08
ENSMUSG00000036292	Gramd1c	GRAM domain containing 1C	395.997	538.648	112.676	113.373	0.241012	-2.05283	2.06658e-07	7.75813e-06
ENSMUSG00000036904	Fzd8	frizzled homolog 8 (Drosophila)	413.177	303.287	91.3637	81.9637	0.241058	-2.05255	7.1336e-07	2.45421e-05
ENSMUSG00000062480	Acat3	acetyl-Coenzyme A acetyltransferase 3	2695.71	2288.41	784.394	426.406	0.242093	-2.04636	4.17068e-09	2.04895e-07
ENSMUSG00000054733	Msra	methionine sulfoxide reductase A	2632.95	1858.88	609.11	484.939	0.2427	-2.04275	1.60572e-05	0.000414467
ENSMUSG00000008601	Rab25	RAB25, member RAS oncogene family	35.343	30.2329	9.14751	6.85239	0.243135	-2.04017	0.00754347	0.0758669
ENSMUSG00000054588	Gbp10	guanylate-binding protein 10	33.5378	38.8807	4.11171	13.6893	0.244892	-2.02978	1.11182e-06	3.62647e-05
ENSMUSG00000032496	Ltf	lactotransferrin	806.818	1121.94	148.913	325.532	0.245092	-2.0286	1.05297e-05	0.00028248
ENSMUSG00000026981	Il1rn	interleukin 1 receptor antagonist	1209.87	1118.91	239.484	333.841	0.245301	-2.02738	2.95693e-09	1.48944e-07
ENSMUSG00000026205	Slc23a3	solute carrier family 23 (nucleobase transporters), member 3	16.659	22.671	5.48762	4.19466	0.245335	-2.02717	0.0018243	0.0250904
ENSMUSG00000025175	Fn3k	fructosamine 3 kinase	96.71	78.2953	17.283	25.8296	0.245452	-2.02649	1.51967e-06	4.80345e-05
ENSMUSG00000029778	Adcyap1r1	adenylate cyclase activating polypeptide 1 receptor 1	24.3735	23.4556	5.60745	6.18829	0.245744	-2.02477	0.00252538	0.0327162
ENSMUSG00000064246	Chi3l1	chitinase 3-like 1	167.204	201.83	26.2862	64.8361	0.246015	-2.02318	5.53099e-07	1.94489e-05
ENSMUSG00000025432	Avil	advillin	15.8293	15.9301	3.2133	4.64223	0.246453	-2.02062	0.00730924	0.0745474
ENSMUSG00000025350	Rdh5	retinol dehydrogenase 5	4143.85	2731.3	1099.46	604.212	0.246936	-2.01779	0.000860099	0.0134749
ENSMUSG00000040658	BC048355	cDNA sequence BC048355	292.791	175.802	53.9207	62.3814	0.247289	-2.01573	0.00256614	0.033046
ENSMUSG00000042340	Ctf1	cardiotrophin 1	475.739	294.076	103.858	87.2041	0.247303	-2.01565	0.00176698	0.0244997
ENSMUSG00000023963	Cyp39a1	cytochrome P450, family 39, subfamily a, polypeptide 1	1968.38	1911.05	738.408	225.422	0.247618	-2.01381	5.84236e-08	2.42595e-06
ENSMUSG00000020633	Dcdc2c	doublecortin domain containing 2C	58.3261	63.9653	15.4831	14.9122	0.247675	-2.01348	0.000239466	0.00447029
ENSMUSG00000026307	Scly	selenocysteine lyase	5035.56	4400.98	1317.19	1030.34	0.247896	-2.01219	2.49354e-09	1.26403e-07
ENSMUSG00000086784	Isoc2a	isochorismatase domain containing 2a	4264.19	2624.35	1016.26	697.548	0.24791	-2.01211	0.00259406	0.0332631
ENSMUSG00000020010	Vnn3	vanin 3	6878.2	5597.65	1677.65	1431.5	0.248331	-2.00966	1.59381e-09	8.29062e-08
ENSMUSG00000056148	Rdh9	retinol dehydrogenase 9	4524.06	4272.08	1529.05	664.07	0.248482	-2.00879	5.82078e-09	2.79632e-07
ENSMUSG00000084839	Gm14097	predicted gene 14097	79.4991	107.674	22.8623	23.8542	0.248718	-2.00742	0.00112791	0.0168417
ENSMUSG00000055114	Anxa13	annexin A13	78.2683	64.0408	17.6152	17.9082	0.24873	-2.00735	0.000254512	0.00471429
ENSMUSG00000034910	Pygo1	pygopus 1	22.814	18.8425	3.12205	7.29943	0.249245	-2.00436	7.56834e-07	2.58514e-05
ENSMUSG00000067149	Igj	immunoglobulin joining chain	62.0487	43.4269	15.5729	10.9365	0.250446	-1.99743	0.000669771	0.0109456
ENSMUSG00000025403	Shmt2	serine hydroxymethyltransferase 2 (mitochondrial)	3282.57	2668.14	836.546	660.006	0.250605	-1.99651	2.74241e-09	1.38431e-07
ENSMUSG00000023206	Il15ra	interleukin 15 receptor, alpha chain	1624.37	1335.16	411.171	333.309	0.250666	-1.99616	9.9511e-09	4.57789e-07
ENSMUSG00000003555	Cyp17a1	cytochrome P450, family 17, subfamily a, polypeptide 1	150.487	276.182	52.8766	54.5645	0.250946	-1.99455	0.00838024	0.081835
ENSMUSG00000040146	Rgl3	ral guanine nucleotide dissociation stimulator-like 3	125.77	99.229	29.0754	27.7328	0.251582	-1.9909	3.2521e-07	1.18727e-05
ENSMUSG00000064147	Rab44	RAB44, member RAS oncogene family	62.9483	76.691	16.2375	19.0201	0.251598	-1.99081	1.40797e-06	4.48821e-05
ENSMUSG00000053613	4732444A12Rik	RIKEN cDNA 4732444A12 gene	32.2028	19.5331	7.88014	5.18946	0.251728	-1.99006	0.0040777	0.0473767
ENSMUSG00000033006	Sox10	SRY-box containing gene 10	12.6247	7.3632	1.58426	3.49674	0.253245	-1.98139	0.00749693	0.0757498
ENSMUSG00000023044	Csad	cysteine sulfinic acid decarboxylase	4690.51	2707.61	964.94	918.775	0.2537	-1.9788	0.00616253	0.0651912
ENSMUSG00000020684	Rasl10b	RAS-like, family 10, member B	12.6396	11.2279	2.85199	3.23156	0.253975	-1.97724	0.00263779	0.0336431
ENSMUSG00000025701	Alox5	arachidonate 5-lipoxygenase	52.9029	60.3386	12.171	16.7461	0.254444	-1.97458	1.66946e-05	0.000429064
ENSMUSG00000079484	Phyhd1	phytanoyl-CoA dioxygenase domain containing 1	196.97	153.173	43.2557	46.2898	0.254821	-1.97244	8.7364e-06	0.000238117
ENSMUSG00000025330	Padi4	peptidyl arginine deiminase, type IV	57.3579	70.9687	11.3108	21.5606	0.255226	-1.97015	1.6055e-05	0.000414467
ENSMUSG00000025792	Slc25a10	solute carrier family 25 (mitochondrial carrier, dicarboxylate transporter), member 10	10571.9	8145.78	2808.16	1997.56	0.255845	-1.96666	8.46372e-08	3.43673e-06
ENSMUSG00000015247	Nipsnap3b	nipsnap homolog 3B (C, elegans)	6214.58	4895.15	1509.15	1343.47	0.255855	-1.9666	4.16247e-09	2.04895e-07
ENSMUSG00000030717	Nupr1	nuclear protein 1	251.651	159.04	60.9201	44.7336	0.256345	-1.96384	0.0016147	0.0227047
ENSMUSG00000010760	Phlda2	pleckstrin homology-like domain, family A, member 2	57.5852	35.1852	11.3556	12.5319	0.256555	-1.96266	0.00455727	0.0515703
ENSMUSG00000086763	B230378P21Rik	RIKEN cDNA B230378P21 gene	23.6246	22.2297	5.7069	6.10719	0.256727	-1.96169	0.00143525	0.0205164
ENSMUSG00000020085	Aifm2	apoptosis-inducing factor, mitochondrion-associated 2	896.16	882.828	252.663	205.71	0.256758	-1.96152	1.27157e-08	5.75001e-07
ENSMUSG00000027227	Sord	sorbitol dehydrogenase	17435.9	14111.4	4472.86	3661.63	0.25694	-1.9605	3.73451e-09	1.85374e-07
ENSMUSG00000022304	Dpys	dihydropyrimidinase	6435.25	5495.71	1935.13	1144.01	0.257186	-1.95912	8.87463e-09	4.15472e-07
ENSMUSG00000001663	Gstt1	glutathione S-transferase, theta 1	5706.48	3726.87	1381.76	1059.52	0.257873	-1.95527	0.000654784	0.0107595
ENSMUSG00000050445	Cyp8b1	cytochrome P450, family 8, subfamily b, polypeptide 1	4978.75	4746.52	1976.3	540.894	0.257971	-1.95472	2.70087e-06	8.15246e-05
ENSMUSG00000062515	Fabp4	fatty acid binding protein 4, adipocyte	4907.65	5067.79	1615.16	968.026	0.258066	-1.95419	9.89774e-09	4.56213e-07
ENSMUSG00000070348	Ccnd1	cyclin D1	1382.31	1686.05	322.869	472.796	0.258385	-1.95241	9.30657e-10	5.00458e-08
ENSMUSG00000042118	Bhmt2	betaine-homocysteine methyltransferase 2	5256.84	4844.43	1718.94	900.178	0.258397	-1.95234	1.03445e-08	4.7497e-07
ENSMUSG00000073565	Prr16	proline rich 16	355.613	377.85	114.99	75.2293	0.25845	-1.95204	3.87977e-08	1.63663e-06
ENSMUSG00000021999	Cpb2	carboxypeptidase B2 (plasma)	9443.67	8085.48	2356.23	2192.06	0.25855	-1.95149	3.2504e-09	1.62697e-07
ENSMUSG00000085972	1110028F11Rik	RIKEN cDNA 1110028F11 gene	278.193	203.039	54.6071	70.6904	0.259421	-1.94663	6.48303e-06	0.000181251
ENSMUSG00000032561	Acpp	acid phosphatase, prostate	41.3234	63.6275	9.62583	17.7406	0.259821	-1.94441	0.000447273	0.00768832
ENSMUSG00000043687	1190005I06Rik	RIKEN cDNA 1190005I06 gene	292.487	189.125	73.9135	52.3067	0.261151	-1.93705	0.00111674	0.0166958
ENSMUSG00000042073	Abhd14b	abhydrolase domain containing 14b	4515.1	2782.94	1092.78	820.825	0.261274	-1.93636	0.00290191	0.0362565
ENSMUSG00000023232	Serinc2	serine incorporator 2	388.142	254.978	87.3238	81.3718	0.261366	-1.93586	0.000433423	0.00748799
ENSMUSG00000027761	Aadac	arylacetamide deacetylase (esterase)	24743	18623.8	6721.94	4670.16	0.261769	-1.93363	1.25521e-06	4.04445e-05
ENSMUSG00000042834	D0H4S114	DNA segment, human D4S114	6197.51	4270.16	1308.86	1441.84	0.261831	-1.93329	6.08004e-05	0.00135039
ENSMUSG00000022587	Ly6e	lymphocyte antigen 6 complex, locus E	6002.77	4321.68	1224.26	1491.11	0.262049	-1.93209	5.84223e-06	0.000165468
ENSMUSG00000024665	Fads2	fatty acid desaturase 2	16645.4	19853.6	6339.92	3257.53	0.262062	-1.93202	9.28629e-09	4.31361e-07
ENSMUSG00000032482	Cspg5	chondroitin sulfate proteoglycan 5	16.4938	10.3237	4.16483	2.89703	0.262397	-1.93018	0.00255419	0.0329464
ENSMUSG00000032094	Cd3d	CD3 antigen, delta polypeptide	62.3685	38.2516	12.1828	14.3411	0.262644	-1.92882	0.0023156	0.0305285
ENSMUSG00000035042	Ccl5	chemokine (C-C motif) ligand 5	451.489	415.065	111.034	117.864	0.263208	-1.92573	7.26237e-07	2.49491e-05
ENSMUSG00000028603	Scp2	sterol carrier protein 2, liver	99558.1	75831.2	28540.1	17868.9	0.263681	-1.92313	1.46843e-06	4.66226e-05
ENSMUSG00000035305	Ror1	receptor tyrosine kinase-like orphan receptor 1	29.7213	31.2022	6.24725	9.8785	0.263731	-1.92286	1.83114e-06	5.73006e-05
ENSMUSG00000018569	Cldn7	claudin 7	218.147	140.353	54.6915	40.2808	0.263976	-1.92152	0.00125052	0.0183287
ENSMUSG00000089662	Gm14057	predicted gene 14057	116.28	69.0746	31.2103	17.8926	0.263983	-1.92149	0.00888862	0.0856435
ENSMUSG00000037798	Mat1a	methionine adenosyltransferase I, alpha	40649.1	42493.4	19334.3	2697.76	0.264134	-1.92066	0.000755008	0.0120984
ENSMUSG00000031443	F7	coagulation factor VII	3127.95	2457.2	935.804	545.103	0.26423	-1.92013	3.03289e-07	1.11234e-05
ENSMUSG00000079429	Heatr7b1	HEAT repeat containing 7B1	263.682	348.588	91.866	71.2862	0.265554	-1.91292	2.56229e-07	9.52918e-06
ENSMUSG00000038421	Fcrla	Fc receptor-like A	341.301	220.088	73.0848	76.5952	0.26566	-1.91235	0.0007514	0.0120567
ENSMUSG00000021835	Bmp4	bone morphogenetic protein 4	238.343	185.125	53.2987	59.6778	0.265828	-1.91144	3.41245e-07	1.23635e-05
ENSMUSG00000027454	Gins1	GINS complex subunit 1 (Psf1 homolog)	543.032	609.413	153.013	154.546	0.265936	-1.91085	2.31367e-07	8.64494e-06
ENSMUSG00000001348	Acp5	acid phosphatase 5, tartrate resistant	3960.99	3486.13	1046.55	944.236	0.266378	-1.90846	8.81179e-09	4.13341e-07
ENSMUSG00000037813	D630003M21Rik	RIKEN cDNA D630003M21 gene	170.418	105.246	27.6189	46.0988	0.266426	-1.9082	0.00232084	0.0305516
ENSMUSG00000059327	Eda	ectodysplasin-A	26.2908	34.9536	7.10522	9.29978	0.266913	-1.90556	4.77172e-06	0.00013743
ENSMUSG00000057400	Ces1c	carboxylesterase 1C	77578.7	58800.1	21421.8	15112	0.266942	-1.9054	8.57413e-07	2.87927e-05
ENSMUSG00000022906	Parp9	poly (ADP-ribose) polymerase family, member 9	2317.9	2931.27	681.993	727.563	0.267587	-1.90192	6.71672e-09	3.19459e-07
ENSMUSG00000006711	D130043K22Rik	RIKEN cDNA D130043K22 gene	57.047	60.2515	19.8875	11.6086	0.267593	-1.90189	1.53626e-05	0.000399128
ENSMUSG00000037321	Tap1	transporter 1, ATP-binding cassette, sub-family B (MDR/TAP)	530.612	507.143	104.752	174.389	0.268006	-1.89966	5.72875e-09	2.75766e-07
ENSMUSG00000087213	2810408I11Rik	RIKEN cDNA 2810408I11 gene	241.816	276.578	85.3246	54.1836	0.268194	-1.89865	1.6719e-05	0.000429229
ENSMUSG00000040536	Necab1	N-terminal EF-hand calcium binding protein 1	495.132	722.954	183.45	144.612	0.268402	-1.89753	9.34984e-05	0.00197206
ENSMUSG00000089736	Gm14378	predicted gene 14378	36.7457	49.6307	9.34372	13.9273	0.268454	-1.89725	0.00367661	0.0435646
ENSMUSG00000030413	Pglyrp1	peptidoglycan recognition protein 1	397.787	320.717	79.6823	113.977	0.268549	-1.89674	8.97e-07	2.99535e-05
ENSMUSG00000028393	Alad	aminolevulinate, delta-, dehydratase	4675.57	2841.87	1020.24	1009.04	0.268968	-1.8945	0.00326264	0.0397849
ENSMUSG00000027831	Veph1	ventricular zone expressed PH domain homolog 1 (zebrafish)	6.77666	8.8333	1.89315	2.32387	0.269194	-1.89328	0.00316195	0.0387949
ENSMUSG00000026475	Rgs16	regulator of G-protein signaling 16	444.626	555.706	186.515	83.6981	0.269218	-1.89315	2.51231e-06	7.61216e-05
ENSMUSG00000022237	Ankrd33b	ankyrin repeat domain 33B	44.8274	70.8107	16.134	15.3868	0.271641	-1.88023	0.000898153	0.013943
ENSMUSG00000037071	Scd1	stearoyl-Coenzyme A desaturase 1	175.774	244.541	54.8818	59.7419	0.271754	-1.87962	4.4288e-06	0.000129111
ENSMUSG00000033860	Fgg	fibrinogen gamma chain	113796	92013.1	32870.6	23444.8	0.27267	-1.87477	2.15291e-08	9.39725e-07
ENSMUSG00000057729	Prtn3	proteinase 3	440.101	359.528	85.0509	134.087	0.273047	-1.87278	5.66043e-07	1.98364e-05
ENSMUSG00000069873	4930438A08Rik	RIKEN cDNA 4930438A08 gene	22.6507	26.4802	4.68998	8.78316	0.273235	-1.87179	0.0008104	0.0128512
ENSMUSG00000090164	BC035044	cDNA sequence BC035044	72.7882	90.8017	10.815	34.1609	0.273913	-1.86821	9.16111e-06	0.000248558
ENSMUSG00000024353	2010001M09Rik	RIKEN cDNA 2010001M09 gene	154.826	98.5942	32.6514	37.1652	0.274496	-1.86514	0.00124297	0.0182404
ENSMUSG00000075370	Igll1	immunoglobulin lambda-like polypeptide 1	119.896	111.745	33.3474	30.73	0.275646	-1.85911	9.52014e-05	0.00200091
ENSMUSG00000075304	Sp5	trans-acting transcription factor 5	43.7403	41.2211	5.88432	17.6591	0.276071	-1.85689	4.62887e-05	0.00106268
ENSMUSG00000030088	Aldh1l1	aldehyde dehydrogenase 1 family, member L1	40599.9	34344.3	15167.6	5607.73	0.276273	-1.85584	8.20015e-06	0.000225042
ENSMUSG00000029161	Cgref1	cell growth regulator with EF hand domain 1	121.923	115.325	36.8155	29.2237	0.27738	-1.85006	1.83626e-05	0.00046641
ENSMUSG00000064254	Ethe1	ethylmalonic encephalopathy 1	1298.78	824.721	347.194	244.082	0.277458	-1.84966	0.00248506	0.0322919
ENSMUSG00000031445	Proz	protein Z, vitamin K-dependent plasma glycoprotein	4899.1	5885.17	1727.4	1277.09	0.277639	-1.84872	1.90026e-08	8.43318e-07
ENSMUSG00000046006	Gapt	Grb2-binding adaptor, transmembrane	48.4861	36.2912	8.10471	15.5278	0.277727	-1.84826	0.000103181	0.00213664
ENSMUSG00000029380	Cxcl1	chemokine (C-X-C motif) ligand 1	117.622	162.103	15.7853	62.4419	0.278619	-1.84364	0.000507821	0.00858962
ENSMUSG00000059305	Vpreb1	pre-B lymphocyte gene 1	113.817	69.5435	26.6528	24.7693	0.279432	-1.83943	0.00386399	0.045246
ENSMUSG00000022754	Tmem45a	transmembrane protein 45a	206.453	202.659	42.0467	73.1185	0.280475	-1.83406	7.29618e-05	0.00158945
ENSMUSG00000032014	Oaf	OAF homolog (Drosophila)	3896.71	2629.5	1170.37	667.041	0.28056	-1.83362	0.00112864	0.0168421
ENSMUSG00000070332	4933422H20Rik	RIKEN cDNA 4933422H20 gene	42.6647	34.4301	15.5568	6.24298	0.281802	-1.82724	0.000918454	0.0141935
ENSMUSG00000032484	Ngp	neutrophilic granule protein	2822.04	3043.24	561.986	1096.98	0.281814	-1.82719	4.79707e-09	2.34223e-07
ENSMUSG00000030834	Abcc6	ATP-binding cassette, sub-family C (CFTR/MRP), member 6	5352.72	8139.5	2081.9	1739.6	0.282264	-1.82488	0.0004887	0.00831661
ENSMUSG00000001334	Fndc5	fibronectin type III domain containing 5	29.8637	20.2439	4.86123	9.36398	0.282836	-1.82196	0.00049653	0.00843783
ENSMUSG00000004864	Mapk13	mitogen-activated protein kinase 13	172.284	132.996	41.0863	45.7786	0.283517	-1.81849	1.38989e-05	0.000364283
ENSMUSG00000002847	Pla1a	phospholipase A1 member A	4029.51	3694.08	1321.09	877.729	0.2837	-1.81756	6.59754e-08	2.70658e-06
ENSMUSG00000020102	Slc16a7	solute carrier family 16 (monocarboxylic acid transporters), member 7	1033.25	1260.5	355.676	298.652	0.284276	-1.81464	3.58028e-08	1.52921e-06
ENSMUSG00000024899	Papss2	3'-phosphoadenosine 5'-phosphosulfate synthase 2	2525.24	2733.86	910.023	591.003	0.284433	-1.81384	5.47309e-08	2.28055e-06
ENSMUSG00000002332	Dhrs1	dehydrogenase/reductase (SDR family) member 1	8970.95	6554.8	2350.97	2087.19	0.284839	-1.81178	7.80714e-06	0.000215745
ENSMUSG00000031938	4931406C07Rik	RIKEN cDNA 4931406C07 gene	3630.32	3090.86	1003.82	919.007	0.285071	-1.81061	4.01346e-08	1.69004e-06
ENSMUSG00000056071	S100a9	S100 calcium binding protein A9 (calgranulin B)	10467.6	12403	2102.15	4446.79	0.285302	-1.80944	8.10348e-09	3.82369e-07
ENSMUSG00000019853	Hebp2	heme binding protein 2	255.129	181.984	52.0386	73.1479	0.285347	-1.80921	3.35567e-05	0.000795631
ENSMUSG00000056054	S100a8	S100 calcium binding protein A8 (calgranulin A)	9591.36	11201	1958.55	4008.51	0.285936	-1.80623	5.10554e-09	2.47764e-07
ENSMUSG00000030103	Bhlhe40	basic helix-loop-helix family, member e40	12108.2	12383.1	3502.37	3529.41	0.286099	-1.80541	2.94772e-08	1.26355e-06
ENSMUSG00000024427	Spry4	sprouty homolog 4 (Drosophila)	174.116	188.136	45.7968	58.6605	0.287326	-1.79924	9.02601e-08	3.64029e-06
ENSMUSG00000056938	Acbd4	acyl-Coenzyme A binding domain containing 4	1520.38	1159.34	437.893	334.973	0.287395	-1.79889	8.07182e-07	2.72592e-05
ENSMUSG00000039616	Mocos	molybdenum cofactor sulfurase	241.302	203.643	73.0261	55.6209	0.288115	-1.79528	6.02244e-07	2.09915e-05
ENSMUSG00000033948	Zswim5	zinc finger, SWIM domain containing 5	7.25158	7.87317	1.44374	2.93551	0.288484	-1.79344	0.00242164	0.0316297
ENSMUSG00000036381	P2ry14	purinergic receptor P2Y, G-protein coupled, 14	287.309	309.515	102.557	70.6252	0.289171	-1.79	8.85108e-07	2.95978e-05
ENSMUSG00000022802	Lmln	leishmanolysin-like (metallopeptidase M8 family)	487.084	583.666	131.277	179.509	0.289215	-1.78979	3.83517e-07	1.37904e-05
ENSMUSG00000074093	Svip	small VCP/p97-interacting protein	125.2	110.145	33.3704	34.9593	0.289302	-1.78935	1.36749e-06	4.37083e-05
ENSMUSG00000086450	Gm14077	predicted gene 14077	14.42	10.6336	3.4319	3.85625	0.289852	-1.78661	0.00563777	0.0611515
ENSMUSG00000035357	Pdzrn3	PDZ domain containing RING finger 3	227.854	291.631	59.7124	91.5805	0.290194	-1.78491	2.10741e-07	7.89897e-06
ENSMUSG00000087187	Gm13431	predicted gene 13431	104.326	106.403	19.3858	42.232	0.291328	-1.77928	0.00286173	0.0358482
ENSMUSG00000048022	Tmem229a	transmembrane protein 229A	24.3601	26.4482	6.89767	7.95816	0.291352	-1.77916	4.62068e-05	0.00106182
ENSMUSG00000019935	Slc17a8	solute carrier family 17 (sodium-dependent inorganic phosphate cotransporter), member 8	69.9711	70.392	28.2278	12.8292	0.291514	-1.77836	2.03209e-05	0.000512876
ENSMUSG00000021356	Irf4	interferon regulatory factor 4	33.0298	39.5558	8.09286	13.1737	0.291932	-1.7763	7.71728e-06	0.000213508
ENSMUSG00000028464	Tpm2	tropomyosin 2, beta	524.125	322.493	118.202	129.889	0.291973	-1.7761	0.00370664	0.0437901
ENSMUSG00000017493	Igfbp4	insulin-like growth factor binding protein 4	134026	87810.6	37209.5	27858.5	0.292273	-1.77461	0.00147279	0.0210062
ENSMUSG00000025582	Nptx1	neuronal pentraxin 1	10.4447	9.18982	3.29546	2.47965	0.2931	-1.77053	0.00294433	0.0366713
ENSMUSG00000050777	Tmem37	transmembrane protein 37	4828.52	3408.12	1491.72	933.469	0.293407	-1.76902	0.000302161	0.00544868
ENSMUSG00000018599	Smcr7	Smith-Magenis syndrome chromosome region, candidate 7 homolog (human)	1441.62	970.919	346.67	363.759	0.293411	-1.769	0.000385188	0.00674629
ENSMUSG00000001802	Lrp3	low density lipoprotein receptor-related protein 3	297.312	260.393	74.5581	89.672	0.293416	-1.76898	3.11951e-07	1.1406e-05
ENSMUSG00000023737	1700082M22Rik	RIKEN cDNA 1700082M22 gene	34.0563	34.3344	13.4316	6.73768	0.293908	-1.76656	0.00606597	0.0644689
ENSMUSG00000061462	Obscn	obscurin, cytoskeletal calmodulin and titin-interacting RhoGEF	1.86325	3.09395	0.794293	0.667862	0.293947	-1.76637	0.00749021	0.0757288
ENSMUSG00000057802	Gm10030	predicted gene 10030	310.354	391.694	114.125	93.0064	0.294018	-1.76602	0.000135175	0.00269178
ENSMUSG00000022809	Nr1i2	nuclear receptor subfamily 1, group I, member 2	957.41	724.042	273.998	222.953	0.294502	-1.76365	1.46719e-06	4.66226e-05
ENSMUSG00000085455	1810059H22Rik	RIKEN cDNA 1810059H22 gene	184.672	113.979	50.8222	37.5529	0.294862	-1.76189	0.00559471	0.0608192
ENSMUSG00000000159	Igsf5	immunoglobulin superfamily, member 5	1103.35	812.965	311.758	256.892	0.295688	-1.75785	9.72742e-06	0.000262728
ENSMUSG00000028792	Ak2	adenylate kinase 2	16862.5	13527.9	4934.16	4084.95	0.295725	-1.75767	1.21817e-07	4.77588e-06
ENSMUSG00000050069	Grem2	gremlin 2 homolog, cysteine knot superfamily (Xenopus laevis)	259.823	389.748	125.385	67.7042	0.29626	-1.75506	0.00172855	0.0240226
ENSMUSG00000063873	Slc24a3	solute carrier family 24 (sodium/potassium/calcium exchanger), member 3	63.563	85.6556	27.0435	17.3642	0.296589	-1.75346	7.9547e-05	0.00170951
ENSMUSG00000021492	F12	coagulation factor XII (Hageman factor)	29354.2	20736.8	8739.02	6171.38	0.296617	-1.75333	0.000185306	0.003548
ENSMUSG00000020620	Abca8b	ATP-binding cassette, sub-family A (ABC1), member 8b	808.193	1252.01	291.221	323.953	0.297557	-1.74876	0.000851317	0.0133636
ENSMUSG00000030862	Cpxm2	carboxypeptidase X 2 (M14 family)	34.0477	21.6088	8.71751	7.90934	0.297668	-1.74822	0.00779919	0.0776536
ENSMUSG00000047735	Samd9l	sterile alpha motif domain containing 9-like	293.686	509.848	94.8167	145.61	0.298155	-1.74586	0.00767562	0.0769044
ENSMUSG00000031434	Morc4	microrchidia 4	880.284	1123.19	280.834	318.658	0.298172	-1.74578	9.63904e-08	3.86144e-06
ENSMUSG00000008193	Spib	Spi-B transcription factor (Spi-1/PU,1 related)	156.073	100.367	26.1661	50.5865	0.298183	-1.74573	0.00254769	0.0328803
ENSMUSG00000054905	Stfa3	stefin A3	1281.01	1813.39	305.145	621.698	0.298441	-1.74448	0.000180855	0.00346836
ENSMUSG00000004612	Nkg7	natural killer cell group 7 sequence	141.855	116.794	32.4316	45.1839	0.29899	-1.74183	9.73281e-05	0.00203664
ENSMUSG00000016382	Pls3	plastin 3 (T-isoform)	799.965	763.59	229.821	239.43	0.299052	-1.74153	1.25822e-07	4.90871e-06
ENSMUSG00000010663	Fads1	fatty acid desaturase 1	11323.7	10302.2	4378.17	2113.88	0.299172	-1.74095	3.46985e-07	1.25524e-05
ENSMUSG00000026589	Sec16b	SEC16 homolog B (S, cerevisiae)	640.703	733.701	222.087	190.684	0.299281	-1.74043	1.31764e-07	5.10715e-06
ENSMUSG00000002985	Apoe	apolipoprotein E	1.33287e+06	830521	403049	247046	0.299441	-1.73966	0.00713811	0.0731771
ENSMUSG00000031273	Col4a6	collagen, type IV, alpha 6	11.5808	12.4906	3.64894	3.62597	0.301158	-1.73141	0.00766607	0.0768636
ENSMUSG00000038807	Rap1gap2	RAP1 GTPase activating protein 2	52.6604	85.4728	12.8608	29.0217	0.302109	-1.72686	0.00462145	0.0521463
ENSMUSG00000031712	Il15	interleukin 15	140.346	146.577	43.364	43.8443	0.30287	-1.72323	5.94023e-06	0.000168044
ENSMUSG00000046718	Bst2	bone marrow stromal cell antigen 2	4474.95	2715.81	1036.55	1151.4	0.303166	-1.72182	0.00569709	0.061605
ENSMUSG00000042363	1110067D22Rik	RIKEN cDNA 1110067D22 gene	3131.56	2903.92	873.631	963.739	0.303342	-1.72098	1.74824e-07	6.62555e-06
ENSMUSG00000025163	Cd7	CD7 antigen	172.105	206.448	48.4698	66.846	0.303536	-1.72006	2.92628e-05	0.000705737
ENSMUSG00000024646	Cyb5	cytochrome b-5	55047.4	34747.9	16478.7	10925.7	0.30411	-1.71733	0.00537131	0.059072
ENSMUSG00000047496	Rnf152	ring finger protein 152	110.134	128.654	34.0727	38.8052	0.30412	-1.71729	2.5978e-07	9.61628e-06
ENSMUSG00000038298	Pdzk1	PDZ domain containing 1	1161.86	1395.38	406.761	374.662	0.304508	-1.71545	1.61749e-07	6.14953e-06
ENSMUSG00000023019	Gpd1	glycerol-3-phosphate dehydrogenase 1 (soluble)	15019.8	12725.1	5107.02	3372.27	0.304551	-1.71524	3.33619e-07	1.21056e-05
ENSMUSG00000029591	Ung	uracil DNA glycosylase	534.524	539.466	164.62	164.721	0.305568	-1.71043	5.07507e-07	1.78984e-05
ENSMUSG00000062345	Serpinb2	serine (or cysteine) peptidase inhibitor, clade B, member 2	27.4034	27.3482	6.69856	10.1201	0.30607	-1.70806	0.00665968	0.0693443
ENSMUSG00000029859	Epha1	Eph receptor A1	1047.89	1048.56	380.664	264.023	0.306447	-1.70629	3.91034e-07	1.39975e-05
ENSMUSG00000024697	Gna14	guanine nucleotide binding protein, alpha 14	21.1692	16.9275	5.87607	5.86335	0.307047	-1.70347	0.00157479	0.022222
ENSMUSG00000032047	Acat1	acetyl-Coenzyme A acetyltransferase 1	124243	97292.9	37036.8	31264.6	0.307215	-1.70268	2.65485e-07	9.79709e-06
ENSMUSG00000052212	Cd177	CD177 antigen	99.3128	134.06	22.7822	49.2904	0.307709	-1.70036	7.70271e-05	0.00166434
ENSMUSG00000061947	Serpina10	serine (or cysteine) peptidase inhibitor, clade A (alpha-1 antiproteinase, antitrypsin), member 10	5777.78	4569.16	1913.46	1282.4	0.30779	-1.69998	5.6661e-07	1.98364e-05
ENSMUSG00000064294	Aox3	aldehyde oxidase 3	3837.54	4779.21	1400.38	1262.28	0.307935	-1.6993	1.52284e-07	5.84555e-06
ENSMUSG00000055652	Klhl25	kelch-like 25 (Drosophila)	701.611	744.003	242.122	205.175	0.308335	-1.69743	3.28177e-07	1.19627e-05
ENSMUSG00000034783	Cd207	CD207 antigen	140.422	107.063	50.2148	26.4927	0.308875	-1.6949	9.2617e-05	0.00195692
ENSMUSG00000024331	Dsc2	desmocollin 2	862.456	1028.49	324.226	262.205	0.309051	-1.69408	2.5854e-07	9.58523e-06
ENSMUSG00000024681	Ms4a3	membrane-spanning 4-domains, subfamily A, member 3	53.8439	44.7429	8.49429	22.1571	0.309745	-1.69085	0.00198862	0.0268991
ENSMUSG00000038224	Serpinf2	serine (or cysteine) peptidase inhibitor, clade F, member 2	63973.1	39555.7	17125.4	15058.6	0.309754	-1.6908	0.00542115	0.0594559
ENSMUSG00000030752	Jmjd5	jumonji domain containing 5	104.277	77.6041	27.349	29.4599	0.311216	-1.68401	0.000117145	0.00238647
ENSMUSG00000060244	Alyref2	Aly/REF export factor 2	174.887	108.8	40.5163	48.1006	0.311236	-1.68392	0.00417314	0.048111
ENSMUSG00000040592	Cd79b	CD79B antigen	443.461	271.829	86.3386	137.278	0.311466	-1.68285	0.00610767	0.0648407
ENSMUSG00000005220	Corin	corin	14.2831	14.4806	5.47669	3.5165	0.31158	-1.68233	0.00830586	0.0813082
ENSMUSG00000020123	Avpr1a	arginine vasopressin receptor 1A	827.099	638.207	275.773	183.075	0.312045	-1.68017	5.55899e-06	0.000158196
ENSMUSG00000032093	Cd3e	CD3 antigen, epsilon polypeptide	35.7774	27.8222	6.7345	13.2126	0.312474	-1.67819	0.00362049	0.0430921
ENSMUSG00000000552	Zfp385a	zinc finger protein 385A	1646.56	1469.53	502.556	476.572	0.313104	-1.67529	3.87586e-07	1.38949e-05
ENSMUSG00000040740	Slc25a34	solute carrier family 25, member 34	26.2392	32.4211	10.0611	8.39812	0.31359	-1.67305	0.00085115	0.0133636
ENSMUSG00000014030	Pax5	paired box gene 5	50.2676	44.2281	8.42572	21.481	0.315308	-1.66517	0.00201894	0.0272186
ENSMUSG00000002475	Abhd3	abhydrolase domain containing 3	1194.35	1090.1	424.118	300.192	0.315956	-1.6622	1.03716e-06	3.41563e-05
ENSMUSG00000031767	Nudt7	nudix (nucleoside diphosphate linked moiety X)-type motif 7	2459.38	1720.53	791.435	534.774	0.316164	-1.66125	0.00058875	0.009789
ENSMUSG00000019737	AI428936	expressed sequence AI428936	262.603	246.696	78.4858	83.1251	0.316191	-1.66113	5.60535e-05	0.00125783
ENSMUSG00000079168	Cd209g	CD209g antigen	160.265	119.956	17.7771	71.3401	0.316811	-1.65831	0.00220817	0.0293554
ENSMUSG00000063445	Nmral1	NmrA-like family domain containing 1	409.933	475.125	143.649	138.072	0.317192	-1.65657	2.32637e-06	7.08474e-05
ENSMUSG00000000811	Txnrd3	thioredoxin reductase 3	117.422	96.946	28.6272	39.8041	0.318065	-1.65261	8.89049e-06	0.000241764
ENSMUSG00000050315	Synpo2	synaptopodin 2	12.5394	11.6458	2.96728	4.76312	0.31847	-1.65077	0.0026851	0.0340465
ENSMUSG00000041754	Trem3	triggering receptor expressed on myeloid cells 3	53.2527	53.5919	15.1342	19.0878	0.31915	-1.64769	0.00303035	0.0375858
ENSMUSG00000030737	Slco2b1	solute carrier organic anion transporter family, member 2b1	172.298	166.852	85.4865	23.4109	0.320023	-1.64375	0.000791201	0.0125854
ENSMUSG00000024339	Tap2	transporter 2, ATP-binding cassette, sub-family B (MDR/TAP)	2957.21	2240.74	749.042	921.743	0.320268	-1.64265	2.04885e-06	6.32838e-05
ENSMUSG00000039981	Zc3h12d	zinc finger CCCH type containing 12D	43.3623	51.4092	13.6515	16.8565	0.320769	-1.64039	2.81691e-05	0.000680734
ENSMUSG00000022574	Naprt1	nicotinate phosphoribosyltransferase domain containing 1	2422.6	1559.35	744.778	540.725	0.321687	-1.63627	0.00433727	0.0495487
ENSMUSG00000029359	Tesc	tescalcin	68.7627	48.263	21.2958	16.6038	0.322709	-1.63169	0.00596259	0.06364
ENSMUSG00000005107	Slc2a9	solute carrier family 2 (facilitated glucose transporter), member 9	688.639	656.992	229.195	207.179	0.323146	-1.62974	1.33677e-06	4.2899e-05
ENSMUSG00000001155	Ftcd	formiminotransferase cyclodeaminase	7376.75	6148.96	2744.69	1653.46	0.324041	-1.62575	1.62711e-06	5.13196e-05
ENSMUSG00000027187	Cat	catalase	29617	26558.2	10532.1	7736.38	0.324068	-1.62563	9.54796e-07	3.16621e-05
ENSMUSG00000034837	Gnat1	guanine nucleotide binding protein, alpha transducing 1	259.829	300.174	127.189	55.1481	0.324506	-1.62368	1.64336e-05	0.00042281
ENSMUSG00000045092	S1pr1	sphingosine-1-phosphate receptor 1	1338.41	1107.97	411.506	385.229	0.324521	-1.62362	9.48745e-07	3.15052e-05
ENSMUSG00000017737	Mmp9	matrix metallopeptidase 9	463.035	528.675	90.7288	232.588	0.324818	-1.6223	4.2572e-06	0.00012426
ENSMUSG00000032420	Nt5e	5' nucleotidase, ecto	1172.86	1262.57	416.004	378.454	0.325065	-1.6212	6.90351e-07	2.37936e-05
ENSMUSG00000022332	Khdrbs3	KH domain containing, RNA binding, signal transduction associated 3	521.428	442.508	156.88	157.677	0.325162	-1.62077	2.27301e-06	6.96845e-05
ENSMUSG00000029716	Tfr2	transferrin receptor 2	8499.93	6936.43	2854.51	2182.58	0.325166	-1.62075	1.11649e-06	3.63673e-05
ENSMUSG00000006021	Kptn	kaptin	1011.96	730.449	293.053	275.714	0.325258	-1.62034	5.87927e-05	0.00131068
ENSMUSG00000033967	2310014L17Rik	RIKEN cDNA 2310014L17 gene	10.0939	15.213	3.48334	4.79272	0.325873	-1.61762	0.00637305	0.0669987
ENSMUSG00000024066	Xdh	xanthine dehydrogenase	294.605	417.499	142.076	90.811	0.32593	-1.61736	0.000458232	0.00784846
ENSMUSG00000071561	BC100530	cDNA sequence BC100530	851.693	1151.58	204.371	451.504	0.326212	-1.61612	0.000212322	0.00401697
ENSMUSG00000026692	Fmo4	flavin containing monooxygenase 4	265.912	325.057	119.325	74.8665	0.327476	-1.61054	8.52984e-06	0.000232753
ENSMUSG00000061808	Ttr	transthyretin	610304	385976	189304	138175	0.327535	-1.61028	0.00658209	0.0686958
ENSMUSG00000019982	Myb	myeloblastosis oncogene	75.1116	73.5972	26.0777	22.9475	0.328514	-1.60597	3.45404e-05	0.000815713
ENSMUSG00000034173	2410018M08Rik	RIKEN cDNA 2410018M08 gene	70.5466	75.2266	24.0118	24.09	0.328813	-1.60466	0.000302375	0.00544868
ENSMUSG00000076498	Trbc2	T cell receptor beta, constant 2	98.611	71.5724	16.4995	39.7277	0.329153	-1.60317	0.00504063	0.0560289
ENSMUSG00000026574	Dpt	dermatopontin	277.874	170.133	67.979	80.1273	0.329383	-1.60216	0.0073984	0.0751997
ENSMUSG00000042659	Arrdc4	arrestin domain containing 4	1073.44	1487.15	365.256	482.358	0.329853	-1.60011	4.15671e-05	0.000962859
ENSMUSG00000029656	C8b	complement component 8, beta polypeptide	3027.33	3065.73	1130.42	887.98	0.330107	-1.59899	1.35085e-06	4.32593e-05
ENSMUSG00000036885	Arhgef26	Rho guanine nucleotide exchange factor (GEF) 26	404.334	452.295	193.797	89.9753	0.330148	-1.59882	2.90937e-05	0.000702368
ENSMUSG00000030214	Plbd1	phospholipase B domain containing 1	1516.58	1752.49	496.902	590.824	0.331553	-1.59269	6.17139e-07	2.14793e-05
ENSMUSG00000033715	Akr1c14	aldo-keto reductase family 1, member C14	4292.22	5783.53	2335.2	1023.86	0.332269	-1.58958	0.00141521	0.020294
ENSMUSG00000033389	Arhgap44	Rho GTPase activating protein 44	70.104	73.6956	24.3383	23.628	0.332389	-1.58906	2.98466e-05	0.00071764
ENSMUSG00000024799	Tm7sf2	transmembrane 7 superfamily member 2	4874.17	3408.68	1724	1042.54	0.332839	-1.5871	0.00157148	0.0221884
ENSMUSG00000050503	Fbxl22	F-box and leucine-rich repeat protein 22	12.265	11.8454	4.77871	3.28751	0.333394	-1.5847	0.00884154	0.0854312
ENSMUSG00000028518	Prkaa2	protein kinase, AMP-activated, alpha 2 catalytic subunit	179.735	228.617	68.3631	68.2882	0.333471	-1.58437	1.29677e-06	4.17272e-05
ENSMUSG00000076617	Ighm	immunoglobulin heavy constant mu	1465.93	1011.58	332.253	499.346	0.334425	-1.58025	0.000707548	0.0114765
ENSMUSG00000038618	Rassf7	Ras association (RalGDS/AF-6) domain family (N-terminal) member 7	1642.65	1079.37	514.156	399.914	0.334611	-1.57944	0.00312986	0.0385199
ENSMUSG00000027078	Ube2l6	ubiquitin-conjugating enzyme E2L 6	4813.78	3513.14	1427.42	1368.89	0.334614	-1.57943	4.27214e-05	0.000985524
ENSMUSG00000045658	Pid1	phosphotyrosine interaction domain containing 1	4378.4	3695.36	1580.58	1130.63	0.33463	-1.57936	2.76715e-06	8.33146e-05
ENSMUSG00000017453	Pipox	pipecolic acid oxidase	12729.2	9263.65	4433.7	2954.82	0.334773	-1.57875	0.000289466	0.00525173
ENSMUSG00000030559	Rab38	RAB38, member of RAS oncogene family	50.8016	34.403	14.6095	14.0708	0.335395	-1.57607	0.00384118	0.0450895
ENSMUSG00000020098	Pcbd1	pterin 4 alpha carbinolamine dehydratase/dimerization cofactor of hepatocyte nuclear factor 1 alpha (TCF1) 1	14679.5	9299.26	4447.53	3647.97	0.336406	-1.57173	0.00605718	0.0644399
ENSMUSG00000045672	Col27a1	collagen, type XXVII, alpha 1	278.933	336.906	93.1207	114.829	0.336471	-1.57145	1.31493e-06	4.22546e-05
ENSMUSG00000063524	Eno1	enolase 1, alpha non-neuron	9669.76	10161	3950.47	2749.91	0.336709	-1.57042	2.34346e-06	7.12771e-05
ENSMUSG00000038009	Dnajc22	DnaJ (Hsp40) homolog, subfamily C, member 22	3525.14	3290.71	1344.68	963.076	0.337407	-1.56744	3.15697e-06	9.42197e-05
ENSMUSG00000038521	C1s	complement component 1, s subcomponent	25027.5	24773.2	9574.57	7288	0.337422	-1.56738	1.96085e-06	6.09601e-05
ENSMUSG00000034427	Myo15b	myosin XVB	163.519	205.413	79.3169	45.6074	0.337462	-1.5672	7.36984e-05	0.00160403
ENSMUSG00000059900	Tmem40	transmembrane protein 40	71.3263	95.4029	27.7471	28.7355	0.337584	-1.56668	0.000566742	0.00946261
ENSMUSG00000016262	Sertad4	SERTA domain containing 4	18.9966	23.6363	5.3637	9.0882	0.337764	-1.56591	0.00906591	0.0868959
ENSMUSG00000041959	S100a10	S100 calcium binding protein A10 (calpactin)	3052.56	2297.34	919.767	897.71	0.338506	-1.56275	6.34243e-06	0.000177946
ENSMUSG00000003809	Gcdh	glutaryl-Coenzyme A dehydrogenase	27508.7	20615.3	10542.4	5815.81	0.338737	-1.56176	0.000457758	0.00784596
ENSMUSG00000026610	Esrrg	estrogen-related receptor gamma	41.877	67.511	16.5637	20.6996	0.339459	-1.55869	0.00445975	0.0507053
ENSMUSG00000069806	Cacng7	calcium channel, voltage-dependent, gamma subunit 7	28.9221	21.1199	8.52027	8.59687	0.340828	-1.55289	0.0058397	0.0627775
ENSMUSG00000022751	Nit2	nitrilase family, member 2	5011.14	3656.09	1592.9	1371.79	0.34084	-1.55283	7.6498e-05	0.00165503
ENSMUSG00000035849	Krt222	keratin 222	37.3585	34.5657	14.4709	10.1362	0.340934	-1.55243	0.00295434	0.0367768
ENSMUSG00000031958	Ldhd	lactate dehydrogenase D	191.747	183.596	82.5952	46.1378	0.341797	-1.54879	2.07755e-05	0.000522692
ENSMUSG00000023175	Bsg	basigin	56286.1	38164.3	18391.8	14118.8	0.342987	-1.54378	0.0018231	0.0250883
ENSMUSG00000032053	Pou2af1	POU domain, class 2, associating factor 1	138.333	107.952	34.1286	50.7505	0.343378	-1.54213	2.24034e-05	0.000556612
ENSMUSG00000030109	Slc6a12	solute carrier family 6 (neurotransmitter transporter, betaine/GABA), member 12	4688.07	4008.66	1837.05	1159.76	0.343393	-1.54207	6.05073e-06	0.000170563
ENSMUSG00000040269	Mrps28	mitochondrial ribosomal protein S28	1920.72	1263.72	619.603	478.022	0.343458	-1.54179	0.00369197	0.0436806
ENSMUSG00000020604	Arsg	arylsulfatase G	1504.21	1668.23	527.288	567.323	0.343819	-1.54028	1.99445e-06	6.1924e-05
ENSMUSG00000062545	Tlr12	toll-like receptor 12	253.845	266.055	57.7028	121.901	0.34419	-1.53872	3.9977e-06	0.000117116
ENSMUSG00000042429	Adora1	adenosine A1 receptor	434.166	440.525	201.825	100.298	0.34423	-1.53856	9.12395e-06	0.000247831
ENSMUSG00000022540	Rogdi	rogdi homolog (Drosophila)	4294.31	2878.09	1481.43	996.799	0.344304	-1.53824	0.00369786	0.043708
ENSMUSG00000021900	Btd	biotinidase	1791.96	1343.69	629.453	454.539	0.344482	-1.5375	6.21957e-05	0.0013801
ENSMUSG00000039942	Ptger4	prostaglandin E receptor 4 (subtype EP4)	31.0243	40.6122	8.92195	15.884	0.345028	-1.53522	0.000224516	0.0042209
ENSMUSG00000045826	Ptprcap	protein tyrosine phosphatase, receptor type, C polypeptide-associated protein	293.905	182.452	78.8219	86.5214	0.345838	-1.53183	0.00768671	0.0769831
ENSMUSG00000031138	F9	coagulation factor IX	2194.06	2380.02	903.169	685.143	0.346037	-1.531	3.3388e-06	9.92742e-05
ENSMUSG00000021094	Dhrs7	dehydrogenase/reductase (SDR family) member 7	1408.47	1017.5	426.59	416.296	0.346197	-1.53033	0.00010227	0.00212146
ENSMUSG00000055704	Gm9978	predicted gene 9978	18.551	18.717	6.89431	6.06041	0.346389	-1.52953	0.00464286	0.0523375
ENSMUSG00000021509	Slc25a48	solute carrier family 25, member 48	185.033	223.802	104.459	38.0857	0.347503	-1.5249	0.00141442	0.020294
ENSMUSG00000028001	Fga	fibrinogen alpha chain	75978.3	67030	30218.7	19723.9	0.348015	-1.52278	5.33622e-06	0.000152401
ENSMUSG00000086071	Gm12354	predicted gene 12354	133.611	111.808	47.1108	38.6159	0.348076	-1.52253	0.00448488	0.050894
ENSMUSG00000024776	Stambpl1	STAM binding protein like 1	208.641	147.262	54.8887	69.9682	0.34954	-1.51647	0.000338704	0.00604853
ENSMUSG00000030771	Micalcl	MICAL C-terminal like	19.297	22.9918	7.61064	7.25367	0.350265	-1.51348	0.0088096	0.085157
ENSMUSG00000025533	Asl	argininosuccinate lyase	8300.17	6818.15	3701.5	1615.41	0.350486	-1.51257	0.000507004	0.00858962
ENSMUSG00000022575	Gsdmd	gasdermin D	633.788	643.383	218.717	232.116	0.351742	-1.50741	6.04434e-06	0.000170563
ENSMUSG00000037991	A630055G03Rik	RIKEN cDNA A630055G03 gene	34.5598	43.0978	11.7827	15.6846	0.35244	-1.50455	0.000216236	0.00408453
ENSMUSG00000071551	Akr1c19	aldo-keto reductase family 1, member C19	571.6	477.16	210.666	160.402	0.352573	-1.504	2.55355e-05	0.000623719
ENSMUSG00000006736	Tspan31	tetraspanin 31	4095.48	4055.01	1660.7	1223.09	0.352587	-1.50395	5.81721e-06	0.000165151
ENSMUSG00000059363	Fxn	frataxin	595.351	396.897	177.48	174.188	0.35314	-1.50169	0.00212662	0.0283907
ENSMUSG00000001665	Gstt3	glutathione S-transferase, theta 3	786.361	589.308	333.15	154.408	0.353196	-1.50146	0.00255767	0.0329735
ENSMUSG00000030674	Qprt	quinolinate phosphoribosyltransferase	19180.9	15384	7223.09	5033.77	0.353362	-1.50078	8.32497e-06	0.000227683
ENSMUSG00000024910	Ctsw	cathepsin W	51.811	69.1822	17.0075	25.9007	0.353367	-1.50076	0.00160427	0.0226114
ENSMUSG00000059108	Ifitm6	interferon induced transmembrane protein 6	348.207	359.402	72.4958	178.542	0.353458	-1.50039	5.1237e-05	0.00115846
ENSMUSG00000020227	Irak3	interleukin-1 receptor-associated kinase 3	84.9882	122.782	28.0255	45.6843	0.353499	-1.50022	0.000817766	0.0129476
ENSMUSG00000027690	Slc2a2	solute carrier family 2 (facilitated glucose transporter), member 2	5924.37	6661.21	2591.83	1876.51	0.35381	-1.49895	5.08342e-06	0.000145704
ENSMUSG00000039347	Atp6v0e2	ATPase, H+ transporting, lysosomal V0 subunit E2	147.868	115.584	54.5475	39.0726	0.354112	-1.49772	0.000187764	0.00358644
ENSMUSG00000067279	Ppp1r3c	protein phosphatase 1, regulatory (inhibitor) subunit 3C	1538.54	1369.47	490.829	543.97	0.354572	-1.49585	3.9008e-06	0.000114699
ENSMUSG00000031906	Smpd3	sphingomyelin phosphodiesterase 3, neutral	14.5162	13.7108	4.38327	5.69588	0.355791	-1.4909	0.00257133	0.0330663
ENSMUSG00000034463	Scara3	scavenger receptor class A, member 3	68.1268	67.6635	24.9303	23.5552	0.355802	-1.49085	0.000125474	0.00252599
ENSMUSG00000029247	Paics	phosphoribosylaminoimidazole carboxylase, phosphoribosylaminoribosylaminoimidazole, succinocarboxamide synthetase	14888.6	16920.5	6557.53	4804.65	0.355965	-1.49019	5.40192e-06	0.000154094
ENSMUSG00000078964	Ces1b	carboxylesterase 1B	1030.77	884.45	439.654	244.463	0.355967	-1.49019	1.92223e-05	0.000487209
ENSMUSG00000025815	Dhtkd1	dehydrogenase E1 and transketolase domain containing 1	692.761	862.248	359.626	196.808	0.356622	-1.48753	5.76555e-05	0.00129014
ENSMUSG00000041012	Cmtm8	CKLF-like MARVEL transmembrane domain containing 8	2216.77	1503.23	737.728	594.131	0.356753	-1.487	0.00214517	0.0286134
ENSMUSG00000005800	Mmp8	matrix metallopeptidase 8	81.8731	123.783	27.5969	46.0568	0.356862	-1.48656	0.00264229	0.0336825
ENSMUSG00000066684	Pilrb1	paired immunoglobin-like type 2 receptor beta 1	212.16	159.289	55.3066	77.7872	0.357002	-1.486	0.000165622	0.00321495
ENSMUSG00000071856	Mcc	mutated in colorectal cancers	197.362	316.932	106.411	78.2021	0.357744	-1.483	0.00878875	0.0850244
ENSMUSG00000025076	Casp7	caspase 7	523.369	534.403	172.839	207.348	0.35814	-1.4814	6.28873e-06	0.000176855
ENSMUSG00000022902	Stfa2	stefin A2	953.253	1171.19	212.111	552.521	0.358598	-1.47956	0.00030965	0.00557536
ENSMUSG00000025762	Larp1b	La ribonucleoprotein domain family, member 1B	86.885	75.1869	34.8646	23.5054	0.358894	-1.47837	0.00113579	0.0169276
ENSMUSG00000031995	St14	suppression of tumorigenicity 14 (colon carcinoma)	56.462	56.8217	20.6309	20.2382	0.359494	-1.47596	0.00113526	0.0169276
ENSMUSG00000034285	Nipsnap1	4-nitrophenylphosphatase domain and non-neuronal SNAP25-like protein homolog 1 (C, elegans)	25416.8	18245.5	8803.6	6962.59	0.359813	-1.47468	0.000415305	0.00722727
ENSMUSG00000024386	Proc	protein C	17622.5	12654.3	6044.04	4931.12	0.361207	-1.4691	0.000371538	0.006538
ENSMUSG00000035275	Raver2	ribonucleoprotein, PTB-binding 2	29.0599	40.5098	11.5141	13.7129	0.36134	-1.46857	0.000934385	0.0143653
ENSMUSG00000018830	Myh11	myosin, heavy polypeptide 11, smooth muscle	60.8001	81.9296	26.5715	25.2277	0.361656	-1.46731	2.67936e-05	0.00065145
ENSMUSG00000018387	Shroom1	shroom family member 1	196.123	183.436	83.8574	54.0227	0.362006	-1.46592	5.68896e-05	0.0012742
ENSMUSG00000019326	Aoc3	amine oxidase, copper containing 3	18.726	23.5828	6.46224	8.93254	0.362572	-1.46366	0.00369371	0.0436806
ENSMUSG00000028064	Sema4a	sema domain, immunoglobulin domain (Ig), transmembrane domain (TM) and short cytoplasmic domain, (semaphorin) 4A	4945.1	3976.36	1633.41	1615.64	0.362883	-1.46242	8.86297e-06	0.000241291
ENSMUSG00000064215	Ifi27l1	interferon, alpha-inducible protein 27 like 1	993.926	705.38	288.362	331.326	0.363351	-1.46056	0.000345433	0.00614571
ENSMUSG00000029664	Tfpi2	tissue factor pathway inhibitor 2	1215.98	1148.1	500.393	361.879	0.363469	-1.4601	1.72354e-05	0.000440121
ENSMUSG00000028185	Dnase2b	deoxyribonuclease II beta	265.139	306.211	125.417	83.0158	0.363555	-1.45975	3.25903e-05	0.000778127
ENSMUSG00000028251	2610029I01Rik	RIKEN cDNA 2610029I01 gene	636.273	617.238	286.901	170.529	0.363664	-1.45932	3.42984e-05	0.000812409
ENSMUSG00000038884	A230050P20Rik	RIKEN cDNA A230050P20 gene	1031.44	1085.33	371.397	401.858	0.364006	-1.45797	1.10315e-05	0.000294751
ENSMUSG00000026858	Fam73b	family with sequence similarity 73, member B	2668.23	2645.56	1163.87	779.088	0.364379	-1.45649	1.94915e-05	0.000492986
ENSMUSG00000000278	Scpep1	serine carboxypeptidase 1	1772.9	1904.6	711.996	634.993	0.364996	-1.45405	8.32252e-06	0.000227683
ENSMUSG00000035637	Grhpr	glyoxylate reductase/hydroxypyruvate reductase	34386	22691	11675.4	9252.34	0.365352	-1.45264	0.00493522	0.0550109
ENSMUSG00000059060	Rad51l1	RAD51-like 1 (S, cerevisiae)	68.5787	82.3344	24.0814	31.3245	0.365831	-1.45075	0.00116588	0.017313
ENSMUSG00000008035	Mid1ip1	Mid1 interacting protein 1 (gastrulation specific G12-like (zebrafish))	4378.01	2749.92	1140.63	1477.89	0.366016	-1.45002	0.00876448	0.084824
ENSMUSG00000038167	Plekhg6	pleckstrin homology domain containing, family G (with RhoGef domain) member 6	62.7651	54.9012	28.9885	14.3781	0.367292	-1.445	0.000669225	0.0109441
ENSMUSG00000026355	Mcm6	minichromosome maintenance deficient 6 (MIS5 homolog, S, pombe) (S, cerevisiae)	1429.67	2066.27	600.602	688.511	0.367454	-1.44436	0.000532135	0.00895367
ENSMUSG00000028980	H6pd	hexose-6-phosphate dehydrogenase (glucose 1-dehydrogenase)	5515.95	6161.65	2542.15	1763.83	0.367467	-1.44431	1.14223e-05	0.000304374
ENSMUSG00000029153	Ociad2	OCIA domain containing 2	1010.04	682.746	377.811	246.5	0.367508	-1.44415	0.0056081	0.0608908
ENSMUSG00000038695	Josd2	Josephin domain containing 2	1608.25	2181.74	807.004	590.766	0.367542	-1.44402	0.000155942	0.00305186
ENSMUSG00000022265	Ank	progressive ankylosis	468.04	542.017	183.698	188.904	0.367594	-1.44382	1.3664e-05	0.000359298
ENSMUSG00000033684	Qsox1	quiescin Q6 sulfhydryl oxidase 1	12592.9	9828.87	4975.91	3295.77	0.367622	-1.4437	5.10799e-05	0.0011571
ENSMUSG00000021922	Itih4	inter alpha-trypsin inhibitor, heavy chain 4	52774.9	50878.1	19219.1	19064.5	0.368036	-1.44208	7.07097e-06	0.00019631
ENSMUSG00000053846	Lipg	lipase, endothelial	21.7886	23.2099	9.78907	6.83197	0.368091	-1.44186	0.00343249	0.041424
ENSMUSG00000032607	Amt	aminomethyltransferase	2611.66	2293.66	1058.13	754.51	0.368235	-1.4413	2.15197e-05	0.000538579
ENSMUSG00000036782	Klhl13	kelch-like 13 (Drosophila)	301.311	372.492	139.05	110.055	0.368422	-1.44057	2.06223e-05	0.000519386
ENSMUSG00000023341	Mx2	myxovirus (influenza virus) resistance 2	48.9537	50.6917	18.672	18.1976	0.368703	-1.43947	0.00101838	0.0154576
ENSMUSG00000052270	Fpr2	formyl peptide receptor 2	245.576	280.092	62.894	131.759	0.368944	-1.43853	4.3668e-05	0.00100542
ENSMUSG00000008540	Mgst1	microsomal glutathione S-transferase 1	57407.6	37649.5	21225.2	14021.7	0.369489	-1.4364	0.00948411	0.0898582
ENSMUSG00000066191	Anks6	ankyrin repeat and sterile alpha motif domain containing 6	21.8267	35.0079	10.1215	10.9574	0.369593	-1.43599	0.00653223	0.0683709
ENSMUSG00000026365	Cfh	complement component factor h	7255.32	8479.58	2759.79	3086.47	0.370235	-1.43349	5.12619e-06	0.000146754
ENSMUSG00000057098	Ebf1	early B cell factor 1	33.7029	34.875	11.0679	14.454	0.370827	-1.43118	0.00143234	0.0204904
ENSMUSG00000079427	Gm2382	predicted gene 2382	499.069	346.971	181.146	134.375	0.371619	-1.4281	0.00203387	0.0273735
ENSMUSG00000030107	Usp18	ubiquitin specific peptidase 18	670.241	676.413	286.844	216.337	0.372352	-1.42526	3.02766e-05	0.000727248
ENSMUSG00000030157	Clec2d	C-type lectin domain family 2, member d	3269.02	2277.05	1221.58	853.891	0.372903	-1.42313	0.00254682	0.0328803
ENSMUSG00000089678	Agxt2	alanine-glyoxylate aminotransferase 2	4702.76	4262.33	1812.27	1545.4	0.373208	-1.42195	1.53125e-05	0.000398258
ENSMUSG00000023132	Gzma	granzyme A	304.988	382.236	129.727	127.694	0.37327	-1.42171	0.000104871	0.00216788
ENSMUSG00000022528	Hes1	hairy and enhancer of split 1 (Drosophila)	4680.86	3294.81	1609.25	1390.95	0.374828	-1.4157	0.000886062	0.0137911
ENSMUSG00000022885	St6gal1	beta galactoside alpha 2,6 sialyltransferase 1	6245.58	5442.12	1887.79	2509.78	0.374896	-1.41544	7.62272e-06	0.000211137
ENSMUSG00000057143	Trim12c	tripartite motif-containing 12C	206.759	179.208	77.022	68.2657	0.375094	-1.41468	9.57364e-05	0.00201038
ENSMUSG00000034687	Fras1	Fraser syndrome 1 homolog (human)	14.0479	22.5209	6.3734	7.4009	0.375354	-1.41368	0.00696949	0.0719738
ENSMUSG00000044254	Pcsk9	proprotein convertase subtilisin/kexin type 9	439.953	473.169	187.989	156.025	0.37543	-1.41338	2.31002e-05	0.000570364
ENSMUSG00000029718	Pcolce	procollagen C-endopeptidase enhancer protein	2132.18	1494.69	631.838	736.451	0.375897	-1.41159	0.000759136	0.0121401
ENSMUSG00000039676	Capsl	calcyphosine-like	70.7663	59.1267	24.4211	24.6146	0.376162	-1.41058	0.00820802	0.080648
ENSMUSG00000026389	Steap3	STEAP family member 3	919.05	683.262	365.781	239.845	0.376646	-1.40872	0.000617155	0.0102257
ENSMUSG00000050390	C77080	expressed sequence C77080	391.612	343.722	158.094	119.948	0.376791	-1.40816	3.35272e-05	0.000795631
ENSMUSG00000074794	Arrdc3	arrestin domain containing 3	1989.54	2514.22	858.339	844.777	0.376833	-1.408	1.00233e-05	0.000269501
ENSMUSG00000024981	Acsl5	acyl-CoA synthetase long-chain family member 5	6932.71	6287.17	2831.64	2173.03	0.377246	-1.40642	2.04638e-05	0.000515938
ENSMUSG00000091803	Cox16	COX16 cytochrome c oxidase assembly homolog (S, cerevisiae)	839.025	562.209	289.543	241.427	0.377579	-1.40515	0.00397672	0.0464017
ENSMUSG00000078234	Klhdc7a	kelch domain containing 7A	180.313	169.029	63.5098	68.9467	0.377809	-1.40427	2.66658e-05	0.000649004
ENSMUSG00000055653	Gpc3	glypican 3	5810.85	7665.41	2818.01	2294.6	0.37807	-1.40328	2.38308e-05	0.000586582
ENSMUSG00000042524	Sun2	Sad1 and UNC84 domain containing 2	2968.77	2375.21	1136.9	890.961	0.378129	-1.40305	2.80086e-05	0.000677979
ENSMUSG00000035783	Acta2	actin, alpha 2, smooth muscle, aorta	916.107	652.793	238.013	357.85	0.378402	-1.40201	0.000905555	0.0140186
ENSMUSG00000019312	Grb7	growth factor receptor bound protein 7	2943.74	2073.79	1141.05	764.845	0.378511	-1.40159	0.00265878	0.0338183
ENSMUSG00000023861	Brp44l	brain protein 44-like	21534.3	15828.4	7568.12	6631.1	0.378684	-1.40093	0.000165235	0.00321005
ENSMUSG00000035914	Cd276	CD276 antigen	217.191	208.807	74.7858	87.307	0.379142	-1.39919	3.63311e-05	0.000854622
ENSMUSG00000062070	Pgk1	phosphoglycerate kinase 1	3967.16	3196.52	1616.05	1109.81	0.379179	-1.39905	3.44755e-05	0.000814988
ENSMUSG00000009350	Mpo	myeloperoxidase	631.737	756.556	185.493	342.834	0.37918	-1.39905	2.09475e-05	0.000526466
ENSMUSG00000026730	Pter	phosphotriesterase related	5447.3	5729.76	2130.29	2124.99	0.379372	-1.39832	1.4042e-05	0.000367618
ENSMUSG00000030468	Siglecg	sialic acid binding Ig-like lectin G	44.2959	28.8304	12.1293	15.7362	0.379667	-1.39719	0.00590479	0.0632773
ENSMUSG00000070730	Fam82a2	family with sequence similarity 82, member A2	5151.28	4716.86	2018.48	1742.03	0.379733	-1.39694	2.64303e-05	0.000643927
ENSMUSG00000031877	Ces2g	carboxylesterase 2G	425.835	371.718	138.309	166.21	0.380444	-1.39424	2.529e-05	0.000618671
ENSMUSG00000068205	Macrod2	MACRO domain containing 2	330.44	256.967	107.272	117.208	0.380782	-1.39296	0.000143998	0.00283905
ENSMUSG00000033147	Slc22a15	solute carrier family 22 (organic anion/cation transporter), member 15	49.5396	64.6699	17.3389	26.402	0.38162	-1.38979	4.77257e-05	0.00109252
ENSMUSG00000026637	Traf5	TNF receptor-associated factor 5	100.673	67.8085	35.5623	28.9816	0.381729	-1.38938	0.00403146	0.046908
ENSMUSG00000039648	Ccbl1	cysteine conjugate-beta lyase 1	1428.16	1125.17	574.465	404.13	0.381918	-1.38867	4.911e-05	0.00111885
ENSMUSG00000028051	Hcn3	hyperpolarization-activated, cyclic nucleotide-gated K+ 3	243.259	249.705	81.1492	107.803	0.381923	-1.38865	0.00033066	0.00591374
ENSMUSG00000002808	Epdr1	ependymin related protein 1 (zebrafish)	125.932	127.259	55.1675	41.9283	0.382153	-1.38778	0.000253422	0.00469775
ENSMUSG00000009566	Fpgs	folylpolyglutamyl synthetase	8520.13	6561.34	3509.04	2280.84	0.382564	-1.38623	0.000225112	0.00422546
ENSMUSG00000021185	9030617O03Rik	RIKEN cDNA 9030617O03 gene	276.259	217.947	96.5372	93.2349	0.382624	-1.386	7.40972e-05	0.00160978
ENSMUSG00000020847	Rph3al	rabphilin 3A-like (without C2 domains)	96.1218	114.574	45.1345	35.7888	0.382746	-1.38554	0.0024327	0.0316909
ENSMUSG00000051147	Nat2	N-acetyltransferase 2 (arylamine N-acetyltransferase)	337.356	270.834	130.36	103.418	0.383027	-1.38448	0.000169728	0.00328664
ENSMUSG00000029304	Spp1	secreted phosphoprotein 1	4390.12	3677.92	1802.31	1312.6	0.384727	-1.37809	4.00373e-05	0.000931707
ENSMUSG00000022340	Sybu	syntabulin (syntaxin-interacting)	206.817	166.257	68.4478	75.6414	0.384835	-1.37769	7.56477e-05	0.00164048
ENSMUSG00000042102	Dmgdh	dimethylglycine dehydrogenase precursor	9141.2	11320.1	4799.05	3103.26	0.384887	-1.37749	2.75428e-05	0.000667627
ENSMUSG00000024158	Hagh	hydroxyacyl glutathione hydrolase	11518.1	8140.36	4523.7	3074.04	0.385127	-1.37659	0.00270624	0.0342599
ENSMUSG00000022797	Tfrc	transferrin receptor	11496.7	16251.6	5763.3	4968.95	0.385436	-1.37544	0.000548563	0.00919768
ENSMUSG00000021340	Gpld1	glycosylphosphatidylinositol specific phospholipase D1	19506.5	15067.8	8538.41	4834.27	0.385438	-1.37543	0.000887181	0.0137996
ENSMUSG00000070720	Tmem200b	transmembrane protein 200B	89.775	142.897	43.5301	46.5834	0.385954	-1.3735	0.00732965	0.0746599
ENSMUSG00000029821	Dfna5	deafness, autosomal dominant 5 (human)	352.813	252.832	112.306	122.366	0.386076	-1.37304	0.000415666	0.00722753
ENSMUSG00000059657	Stfa2l1	stefin A2 like 1	834.837	1032.6	205.043	518.704	0.38614	-1.3728	0.000991337	0.0151337
ENSMUSG00000039114	Nrn1	neuritin 1	13398.4	11698.7	5886.18	3849.17	0.386558	-1.37124	4.47585e-05	0.00102953
ENSMUSG00000040583	Cyp2b13	cytochrome P450, family 2, subfamily b, polypeptide 13	328.633	221.486	103.1	110.331	0.38657	-1.3712	0.00291581	0.036392
ENSMUSG00000029122	Evc	Ellis van Creveld gene homolog (human)	122.377	150.334	53.3453	52.4997	0.386763	-1.37048	0.000310915	0.00558622
ENSMUSG00000019718	2810055F11Rik	RIKEN cDNA 2810055F11 gene	482.958	449.496	187.206	175.687	0.387805	-1.3666	6.32493e-05	0.00139957
ENSMUSG00000046879	Irgm1	immunity-related GTPase family M member 1	1343.21	1205.6	459.492	532.572	0.387832	-1.3665	2.30939e-05	0.000570364
ENSMUSG00000041827	Oasl1	2'-5' oligoadenylate synthetase-like 1	180.592	118.831	47.9394	69.2577	0.389971	-1.35856	0.00659611	0.0688025
ENSMUSG00000028420	Tmem38b	transmembrane protein 38B	3584.25	3061.91	1540.13	1061.24	0.390042	-1.3583	7.0041e-05	0.00153141
ENSMUSG00000040809	Chi3l3	chitinase 3-like 3	1371.42	1936.77	712.879	582.912	0.390345	-1.35718	0.000731985	0.0118327
ENSMUSG00000028550	Atg4c	autophagy-related 4C (yeast)	449.994	555.694	210.518	183.481	0.390409	-1.35694	4.04604e-05	0.000939719
ENSMUSG00000025161	Slc16a3	solute carrier family 16 (monocarboxylic acid transporters), member 3	180.528	261.022	64.5047	108.854	0.391209	-1.35399	0.00242502	0.0316565
ENSMUSG00000020003	Pex7	peroxisomal biogenesis factor 7	2379.16	1936.52	969.843	727.018	0.391803	-1.3518	6.54388e-05	0.00144267
ENSMUSG00000020182	Ddc	dopa decarboxylase	1149.76	1124.03	578.404	316.01	0.392011	-1.35103	0.000137192	0.00272286
ENSMUSG00000026197	Zfand2b	zinc finger, AN1 type domain 2B	1077.33	781.464	420.768	310.492	0.392016	-1.35102	0.00100993	0.0153489
ENSMUSG00000076435	Acsf2	acyl-CoA synthetase family member 2	4958.65	4218.98	2054.58	1557.34	0.392175	-1.35043	5.78777e-05	0.0012939
ENSMUSG00000026669	Mcm10	minichromosome maintenance deficient 10 (S, cerevisiae)	529.275	553.896	190.908	235.49	0.392252	-1.35015	6.43657e-05	0.00142152
ENSMUSG00000040139	9430038I01Rik	RIKEN cDNA 9430038I01 gene	230.902	150.207	78.2515	71.9962	0.392823	-1.34805	0.00792926	0.0786862
ENSMUSG00000030499	Kctd15	potassium channel tetramerisation domain containing 15	32.3402	28.2176	10.2676	13.6153	0.392957	-1.34756	0.00585363	0.0628706
ENSMUSG00000020538	Srebf1	sterol regulatory element binding transcription factor 1	19598.8	13878.6	7025.48	6177.35	0.392973	-1.3475	0.00106689	0.0160612
ENSMUSG00000020277	Pfkl	phosphofructokinase, liver, B-type	8196.32	7519.86	3530.46	2669.61	0.393123	-1.34695	5.23662e-05	0.00118175
ENSMUSG00000028015	Ctso	cathepsin O	2798.78	3007.89	1216.02	1077.21	0.393547	-1.34539	3.82599e-05	0.000893828
ENSMUSG00000055612	Cdca7	cell division cycle associated 7	902.673	789.511	273.882	394.692	0.393661	-1.34497	7.7648e-05	0.00167322
ENSMUSG00000033308	Dpyd	dihydropyrimidine dehydrogenase	4273.84	5667.12	2212.18	1715.13	0.393704	-1.34482	8.68692e-05	0.00184528
ENSMUSG00000027016	Zfp385b	zinc finger protein 385B	224.554	196.584	94.5978	71.9726	0.394138	-1.34323	0.000252223	0.00467916
ENSMUSG00000028459	Cd72	CD72 antigen	202.685	141.97	60.8223	75.6654	0.394571	-1.34164	0.0012954	0.0188937
ENSMUSG00000054226	Tprkb	Tp53rk binding protein	2980.49	2264.64	1106.71	971.016	0.394716	-1.34111	6.81071e-05	0.0014946
ENSMUSG00000035000	Dpp4	dipeptidylpeptidase 4	5722.64	7413.42	2542.69	2663.23	0.394919	-1.34037	2.28477e-05	0.000565296
ENSMUSG00000024525	Impa2	inositol (myo)-1(or 4)-monophosphatase 2	100.291	96.2137	33.3162	44.6528	0.39535	-1.3388	0.000755949	0.0121053
ENSMUSG00000071562	Stfa1	stefin A1	2160.23	3049.03	647.801	1419.49	0.395411	-1.33858	0.00467105	0.0525322
ENSMUSG00000037907	Ankrd13b	ankyrin repeat domain 13b	138.211	130.728	54.2096	52.6155	0.395803	-1.33715	0.00025811	0.00477724
ENSMUSG00000030359	Pzp	pregnancy zone protein	64866.5	83284.5	29959.6	28932.9	0.39613	-1.33596	2.25593e-05	0.000559487
ENSMUSG00000030724	Cd19	CD19 antigen	102.341	78.2422	24.7221	47.125	0.396389	-1.33501	0.000824613	0.0130301
ENSMUSG00000026655	Fam107b	family with sequence similarity 107, member B	6683.98	7833.51	2898.47	2876.97	0.396431	-1.33486	2.96073e-05	0.000712606
ENSMUSG00000054000	Tusc1	tumor suppressor candidate 1	143.815	106.423	49.6299	49.9497	0.396511	-1.33457	0.00118516	0.0175321
ENSMUSG00000026270	Capn10	calpain 10	1971.87	1533.08	814.735	583.174	0.397437	-1.3312	0.000108657	0.00223645
ENSMUSG00000031431	Tsc22d3	TSC22 domain family, member 3	1483.25	1140.48	654.941	391.729	0.397534	-1.33085	0.000948465	0.0145631
ENSMUSG00000073412	Lst1	leukocyte specific transcript 1	772.802	779.801	222.673	396.922	0.397615	-1.33056	0.000125033	0.00252047
ENSMUSG00000002058	Unc119	unc-119 homolog (C, elegans)	3984.76	2801.97	1350.36	1361.57	0.398156	-1.32859	0.00115063	0.0171275
ENSMUSG00000079017	Ifi27l2a	interferon, alpha-inducible protein 27 like 2A	258.916	215.728	64.9822	124.8	0.398366	-1.32783	0.00167889	0.0234143
ENSMUSG00000028538	St3gal3	ST3 beta-galactoside alpha-2,3-sialyltransferase 3	1442.8	1153.4	622.755	416.925	0.399061	-1.32532	0.000108076	0.00222643
ENSMUSG00000026946	Nmi	N-myc (and STAT) interactor	899.122	694.288	288.479	349.995	0.399247	-1.32465	9.34175e-05	0.00197206
ENSMUSG00000020592	Sdc1	syndecan 1	19186.7	15953.1	7309.3	6771.28	0.399279	-1.32453	4.95874e-05	0.00112865
ENSMUSG00000074476	Spc24	SPC24, NDC80 kinetochore complex component, homolog (S, cerevisiae)	407.391	478.801	175.238	180.284	0.399769	-1.32276	0.000103635	0.00214419
ENSMUSG00000036639	Nudt1	nudix (nucleoside diphosphate linked moiety X)-type motif 1	1653.73	1130.51	600.939	516.176	0.399796	-1.32267	0.00356587	0.0427109
ENSMUSG00000030707	Coro1a	coronin, actin binding protein 1A	2465.65	1889.35	582.905	1165.95	0.400083	-1.32163	0.00126545	0.0185134
ENSMUSG00000020638	Cmpk2	cytidine monophosphate (UMP-CMP) kinase 2, mitochondrial	97.3645	110.772	34.776	48.8113	0.400161	-1.32135	0.000162167	0.00316073
ENSMUSG00000051439	Cd14	CD14 antigen	358.513	318.538	125.43	146.48	0.400169	-1.32132	0.000132726	0.00264964
ENSMUSG00000019866	Aim1	absent in melanoma 1	162.907	244.946	86.5012	77.3343	0.400317	-1.32079	0.00372762	0.0439727
ENSMUSG00000031227	Magee1	melanoma antigen, family E, 1	73.1023	53.8161	25.2272	25.7696	0.400365	-1.32061	0.000760332	0.0121511
ENSMUSG00000022949	Clic6	chloride intracellular channel 6	39.1662	28.9933	11.9565	15.4377	0.400452	-1.3203	0.00817652	0.0804378
ENSMUSG00000032418	Me1	malic enzyme 1, NADP(+)-dependent, cytosolic	504.772	465.318	216.753	173.703	0.401083	-1.31803	9.60017e-05	0.00201418
ENSMUSG00000067212	H2-T23	histocompatibility 2, T region locus 23	8847.23	6038.15	3342.2	2651.13	0.401201	-1.3176	0.00473944	0.0531978
ENSMUSG00000006731	B4galnt1	beta-1,4-N-acetyl-galactosaminyl transferase 1	896.735	717.556	384.163	265.978	0.40133	-1.31714	0.000126532	0.00254086
ENSMUSG00000003824	Syce2	synaptonemal complex central element protein 2	432.139	420.816	163.11	180.607	0.401536	-1.3164	0.000258593	0.00478248
ENSMUSG00000043162	Pigy	phosphatidylinositol glycan anchor biosynthesis, class Y	332.025	269.483	132.925	109.583	0.401742	-1.31566	0.000135172	0.00269178
ENSMUSG00000040612	Ildr2	immunoglobulin-like domain containing receptor 2	9.81173	9.36153	3.25575	4.49451	0.402764	-1.31199	0.00536606	0.0590415
ENSMUSG00000016256	Ctsz	cathepsin Z	7623.31	5955.48	2954.39	2539.99	0.403194	-1.31045	7.40931e-05	0.00160978
ENSMUSG00000034382	AI661453	expressed sequence AI661453	315.539	301.322	132.861	116.804	0.403309	-1.31004	0.00011927	0.00242358
ENSMUSG00000057228	Aadat	aminoadipate aminotransferase	2059.78	1967.71	1144.85	484.992	0.40331	-1.31004	0.00128913	0.0188138
ENSMUSG00000072596	Ear2	eosinophil-associated, ribonuclease A family, member 2	1489.73	1000.21	480.474	527.769	0.403461	-1.3095	0.00434614	0.0496263
ENSMUSG00000019779	Frk	fyn-related kinase	70.2416	88.577	25.9471	38.3624	0.403477	-1.30944	0.000126222	0.00253677
ENSMUSG00000029126	Nsg1	neuron specific gene family member 1	57.4728	46.6738	20.8378	21.3591	0.403719	-1.30858	0.0034335	0.041424
ENSMUSG00000036863	Syde2	synapse defective 1, Rho GTPase, homolog 2 (C, elegans)	39.0985	57.4389	12.8083	26.3671	0.404341	-1.30636	0.00796914	0.0789507
ENSMUSG00000082292	Gm12250	predicted gene 12250	55.6021	81.0577	17.2962	38.1757	0.404442	-1.30599	0.00893949	0.0860642
ENSMUSG00000037375	Hhat	hedgehog acyltransferase	53.9315	52.2535	18.4216	24.6929	0.404571	-1.30554	0.00119002	0.0175713
ENSMUSG00000017057	Il13ra1	interleukin 13 receptor, alpha 1	645.475	678.795	254.737	282.982	0.404609	-1.3054	4.80997e-05	0.00109897
ENSMUSG00000032322	Pstpip1	proline-serine-threonine phosphatase-interacting protein 1	175.864	145.686	48.5518	82.0378	0.404636	-1.3053	0.00133347	0.0193426
ENSMUSG00000067818	Myl9	myosin, light polypeptide 9, regulatory	2045.89	1461.49	602.419	822.988	0.404918	-1.3043	0.00119374	0.0176153
ENSMUSG00000025465	Echs1	enoyl Coenzyme A hydratase, short chain, 1, mitochondrial	7426.26	5216.69	3179.6	1961.04	0.405178	-1.30337	0.00756582	0.0760276
ENSMUSG00000028003	Lrat	lecithin-retinol acyltransferase (phosphatidylcholine-retinol-O-acyltransferase)	248.76	308.611	77.0101	150.211	0.406187	-1.29978	0.00026214	0.0048312
ENSMUSG00000030555	Ttc23	tetratricopeptide repeat domain 23	1783.78	1578.19	749.718	620.857	0.406235	-1.29961	0.000130196	0.00260567
ENSMUSG00000019806	Aig1	androgen-induced 1	697.827	568.241	244.924	271.492	0.406425	-1.29894	0.000118011	0.00240207
ENSMUSG00000051517	E130306D19Rik	RIKEN cDNA E130306D19 gene	264.705	332.101	127.211	116.221	0.406471	-1.29878	0.000611167	0.0101335
ENSMUSG00000025075	Habp2	hyaluronic acid binding protein 2	10826.2	9637.51	4662.52	3685.62	0.406516	-1.29861	8.46155e-05	0.00180221
ENSMUSG00000035504	Reep6	receptor accessory protein 6	4709.37	4072.29	2127.33	1458.46	0.406903	-1.29724	0.000110685	0.00227038
ENSMUSG00000030909	Anks4b	ankyrin repeat and sterile alpha motif domain containing 4B	657.255	762.973	318.653	261.701	0.407215	-1.29614	9.84668e-05	0.00205686
ENSMUSG00000039542	Ncam1	neural cell adhesion molecule 1	25.9476	25.7473	10.208	10.924	0.407332	-1.29572	0.00742694	0.0754159
ENSMUSG00000000244	Tspan32	tetraspanin 32	51.2503	73.3652	19.13	31.8665	0.407767	-1.29418	0.00274715	0.0346309
ENSMUSG00000004043	Stat5a	signal transducer and activator of transcription 5A	398.176	291.842	137.706	144.973	0.408197	-1.29266	0.000289226	0.00525173
ENSMUSG00000045165	AI467606	expressed sequence AI467606	60.8782	44.4382	17.0871	26.0795	0.408372	-1.29204	0.00354881	0.0425358
ENSMUSG00000000295	Hddc2	HD domain containing 2	172.179	124.029	56.2907	65.259	0.408868	-1.29029	0.00276254	0.0348066
ENSMUSG00000038656	Cyp3a16	cytochrome P450, family 3, subfamily a, polypeptide 16	6963.56	8694.92	3513.64	2912.8	0.408991	-1.28986	5.87106e-05	0.00131007
ENSMUSG00000009145	Dqx1	DEAQ RNA-dependent ATPase	365.854	348.905	182.386	111.192	0.409321	-1.2887	0.000229913	0.00430205
ENSMUSG00000055184	Fam72a	family with sequence similarity 72, member A	43.3447	38.9012	19.6171	14.1703	0.409376	-1.2885	0.00791409	0.078601
ENSMUSG00000033594	Spata2l	spermatogenesis associated 2-like	354.447	236.348	122.53	120.33	0.409595	-1.28773	0.00594676	0.0635069
ENSMUSG00000027709	Mccc1	methylcrotonoyl-Coenzyme A carboxylase 1 (alpha)	1477.89	1464.11	635.411	574	0.409638	-1.28758	0.00010107	0.00209838
ENSMUSG00000030498	Gas2	growth arrest specific 2	694.323	710.271	316.594	262.362	0.410746	-1.28368	0.000170844	0.00330021
ENSMUSG00000041707	1810011H11Rik	RIKEN cDNA 1810011H11 gene	46.5049	49.7262	14.5896	25.176	0.41173	-1.28023	0.00663599	0.0691278
ENSMUSG00000052151	Ppap2c	phosphatidic acid phosphatase type 2C	989.414	810.561	431.53	312.404	0.411853	-1.2798	0.000208812	0.00395996
ENSMUSG00000064225	Paqr9	progestin and adipoQ receptor family member IX	7079.14	6373.37	2852.97	2707.75	0.411894	-1.27965	7.71679e-05	0.00166437
ENSMUSG00000026630	Batf3	basic leucine zipper transcription factor, ATF-like 3	111.517	97.2632	27.165	59.3521	0.412859	-1.27628	0.00558026	0.0607229
ENSMUSG00000054836	2610002I17Rik	RIKEN cDNA 2610002I17	112.937	75.2113	39.7586	38.2086	0.412903	-1.27612	0.00658226	0.0686958
ENSMUSG00000028066	Pmf1	polyamine-modulated factor 1	1024.83	900.816	419.196	379.049	0.413067	-1.27555	0.000187004	0.00357478
ENSMUSG00000022742	Cpox	coproporphyrinogen oxidase	2852.77	3033.45	1299.48	1143.4	0.413564	-1.27382	8.05511e-05	0.00172642
ENSMUSG00000041132	N4bp2l1	NEDD4 binding protein 2-like 1	368.386	280.885	158.135	111.762	0.414232	-1.27149	0.00046426	0.00794031
ENSMUSG00000044734	Serpinb1a	serine (or cysteine) peptidase inhibitor, clade B, member 1a	133.968	167.982	59.1536	66.3757	0.414264	-1.27138	0.000441769	0.00761015
ENSMUSG00000036478	Btg1	B cell translocation gene 1, anti-proliferative	1648.22	1386.25	705.413	557.907	0.414858	-1.26931	0.000132564	0.00264862
ENSMUSG00000070699	Sars2	seryl-aminoacyl-tRNA synthetase 2	299.145	284.48	126.018	117.398	0.415603	-1.26672	0.000294284	0.00533106
ENSMUSG00000040234	Tm7sf3	transmembrane 7 superfamily member 3	4848.53	4264.45	1953.02	1858.03	0.416716	-1.26286	0.000120179	0.00243582
ENSMUSG00000043243	Fam129c	family with sequence similarity 129, member C	224.514	162.954	82.957	79.1444	0.416863	-1.26235	0.00367322	0.043546
ENSMUSG00000028270	Gbp2	guanylate binding protein 2	417.75	495.703	119.605	262.643	0.416936	-1.2621	0.000594379	0.00987571
ENSMUSG00000040128	Pnrc1	proline-rich nuclear receptor coactivator 1	8530.86	8104.65	3650.23	3320.66	0.417559	-1.25995	0.000106924	0.00220459
ENSMUSG00000062785	Kcnc3	potassium voltage gated channel, Shaw-related subfamily, member 3	45.9486	51.6093	24.5433	16.3786	0.41802	-1.25836	0.00199304	0.0269151
ENSMUSG00000045975	C2cd2	C2 calcium-dependent domain containing 2	430.363	465.049	199.087	176.958	0.418498	-1.25671	0.000115927	0.00236368
ENSMUSG00000069874	Irgm2	immunity-related GTPase family M member 2	782.361	725.365	202.53	431.647	0.419066	-1.25475	0.0001299	0.00260192
ENSMUSG00000056116	H2-T22	histocompatibility 2, T region locus 22	1255.06	1201.91	509.512	524.061	0.419177	-1.25437	0.000119716	0.00242952
ENSMUSG00000034639	Setmar	SET domain and mariner transposase fusion gene	94.8065	111.221	40.1955	46.5161	0.419384	-1.25366	0.003071	0.0380433
ENSMUSG00000027398	Il1b	interleukin 1 beta	445.139	574.067	109.948	319.184	0.419494	-1.25328	0.00964105	0.0910921
ENSMUSG00000031274	Col4a5	collagen, type IV, alpha 5	165.921	180.812	68.7759	77.2976	0.419792	-1.25226	0.00015521	0.00304003
ENSMUSG00000006522	Itih3	inter-alpha trypsin inhibitor, heavy chain 3	63435.3	65951.2	32753.1	21768.8	0.419933	-1.25177	0.000152807	0.00300282
ENSMUSG00000035509	Fbxl21	F-box and leucine-rich repeat protein 21	239.273	156.558	80.3845	86.4617	0.419983	-1.2516	0.00959798	0.0908289
ENSMUSG00000048581	E130311K13Rik	RIKEN cDNA E130311K13 gene	454.679	360.43	142.12	201.759	0.420345	-1.25035	0.000648266	0.0106671
ENSMUSG00000037060	Prkcdbp	protein kinase C, delta binding protein	157.942	126.099	64.8869	54.9951	0.420564	-1.2496	0.00346936	0.0417302
ENSMUSG00000021360	Gcnt2	glucosaminyl (N-acetyl) transferase 2, I-branching enzyme	223.382	242.305	80.0575	116.592	0.42076	-1.24893	9.51799e-05	0.00200091
ENSMUSG00000042082	Arsb	arylsulfatase B	252.126	395.621	126.874	147.232	0.421692	-1.24574	0.00965836	0.0912196
ENSMUSG00000061232	H2-K1	histocompatibility 2, K1, K region	27803.6	24038.4	12399.3	9544.6	0.421799	-1.24537	0.00016765	0.00324904
ENSMUSG00000001053	N4bp3	NEDD4 binding protein 3	401.176	277.056	136.539	150.873	0.422233	-1.24389	0.00310218	0.038332
ENSMUSG00000037541	Shank2	SH3/ankyrin domain gene 2	69.6585	103.539	34.1309	39.3749	0.42292	-1.24154	0.00359386	0.0429035
ENSMUSG00000074170	Plekhf1	pleckstrin homology domain containing, family F (with FYVE domain) member 1	238.672	173.41	95.8046	79.1061	0.422948	-1.24145	0.0011726	0.0173895
ENSMUSG00000058624	Gda	guanine deaminase	222.408	323.427	85.7429	146.084	0.4232	-1.24059	0.00561636	0.0609528
ENSMUSG00000070305	Mpzl3	myelin protein zero-like 3	114.138	118.878	54.88	44.1793	0.423636	-1.2391	0.000684229	0.0111513
ENSMUSG00000040204	2810417H13Rik	RIKEN cDNA 2810417H13 gene	411.272	556.928	145.12	267.241	0.42437	-1.2366	0.00229917	0.0303623
ENSMUSG00000063446	E130309F12Rik	RIKEN cDNA E130309F12 gene	267.794	284.782	165.296	70.1266	0.42461	-1.23579	0.00336968	0.0408606
ENSMUSG00000048351	2010305A19Rik	RIKEN cDNA 2010305A19 gene	1978.45	1503.83	851.064	633.461	0.424806	-1.23512	0.000467709	0.00799356
ENSMUSG00000026639	Lamb3	laminin, beta 3	107.898	100.634	42.2796	46.6591	0.42498	-1.23453	0.00112203	0.0167644
ENSMUSG00000046338	Gpat2	glycerol-3-phosphate acyltransferase 2, mitochondrial	64.5729	43.5811	20.2394	25.9252	0.425284	-1.2335	0.0063301	0.0665804
ENSMUSG00000021200	Asb2	ankyrin repeat and SOCS box-containing 2	245.4	275.909	96.1612	126.361	0.425329	-1.23335	0.000199804	0.00379516
ENSMUSG00000007833	Aldh16a1	aldehyde dehydrogenase 16 family, member A1	3735.58	2669.18	1536.45	1200.8	0.425863	-1.23154	0.00273622	0.0345114
ENSMUSG00000063354	Slc39a4	solute carrier family 39 (zinc transporter), member 4	1750.77	1569.49	859.525	559.567	0.425921	-1.23134	0.000283767	0.00518777
ENSMUSG00000027203	Dut	deoxyuridine triphosphatase	924.957	1039.29	399.261	440.512	0.426016	-1.23102	0.000174616	0.00336492
ENSMUSG00000064120	Mocs1	molybdenum cofactor synthesis 1	2992.45	2993.08	1310.79	1250.43	0.426392	-1.22975	0.000148695	0.00292683
ENSMUSG00000002108	Nr1h3	nuclear receptor subfamily 1, group H, member 3	2366.79	1877.74	1011.82	804.759	0.426471	-1.22948	0.000250162	0.00464453
ENSMUSG00000021474	Sfxn1	sideroflexin 1	1149.23	1156.94	505.536	481.987	0.4267	-1.22871	0.000153868	0.00302119
ENSMUSG00000041119	Pde9a	phosphodiesterase 9A	407.207	434.199	224.513	135.868	0.42684	-1.22823	0.00056375	0.00941923
ENSMUSG00000091721	Gm5549	predicted gene 5549	409.449	423.556	194.696	162.199	0.426945	-1.22788	0.00117755	0.0174412
ENSMUSG00000078941	Taf9	TAF9 RNA polymerase II, TATA box binding protein (TBP)-associated factor	327.76	300.589	120.177	149.265	0.42727	-1.22678	0.000661321	0.0108371
ENSMUSG00000027359	Slc27a2	solute carrier family 27 (fatty acid transporter), member 2	55070.1	40216.6	24028.7	16852.6	0.427525	-1.22592	0.00284967	0.0357159
ENSMUSG00000002033	Cd3g	CD3 antigen, gamma polypeptide	207.833	193.945	63.8979	108.849	0.428388	-1.22301	0.0068302	0.0707496
ENSMUSG00000022216	Psme1	proteasome (prosome, macropain) 28 subunit, alpha	7109.21	5142.69	2658.24	2612.85	0.428683	-1.22202	0.000904791	0.0140186
ENSMUSG00000027261	Hao1	hydroxyacid oxidase 1, liver	18990.5	16962.7	9610.08	5862.21	0.428856	-1.22144	0.000297545	0.00537987
ENSMUSG00000021485	Mxd3	Max dimerization protein 3	286.265	358.28	123.89	154.027	0.429657	-1.21874	0.000345879	0.00614908
ENSMUSG00000021097	Clmn	calmin	183.705	246.781	96.4013	89.3147	0.429911	-1.21789	0.000170014	0.0032895
ENSMUSG00000034449	Dhrs11	dehydrogenase/reductase (SDR family) member 11	812.459	741.079	355.729	314.965	0.430198	-1.21693	0.000385406	0.00674629
ENSMUSG00000029086	Prom1	prominin 1	898.701	891.583	336.422	436.728	0.430309	-1.21655	0.000112148	0.00229645
ENSMUSG00000053656	2700023E23Rik	RIKEN cDNA 2700023E23 gene	68.6552	77.1533	26.4799	36.5402	0.430664	-1.21536	0.00736026	0.0749077
ENSMUSG00000000296	Tpd52l1	tumor protein D52-like 1	136.394	134.542	69.5432	47.6477	0.431041	-1.2141	0.00358522	0.042835
ENSMUSG00000038903	Ccdc68	coiled-coil domain containing 68	304.043	265.418	147.969	98.4639	0.431242	-1.21343	0.00183403	0.0251952
ENSMUSG00000017747	Ghdc	GH3 domain containing	713.918	572.435	314.047	243.003	0.43152	-1.2125	0.000737654	0.0118921
ENSMUSG00000030091	Nup210	nucleoporin 210	2364.48	2688.49	950.285	1239.73	0.431867	-1.21134	0.000128613	0.00258047
ENSMUSG00000030042	Pole4	polymerase (DNA-directed), epsilon 4 (p12 subunit)	1890.81	1492.06	753.662	713.362	0.432116	-1.21051	0.000369749	0.00652003
ENSMUSG00000019762	Iyd	iodotyrosine deiodinase	4373.52	3999.89	2528.35	1109.26	0.432947	-1.20774	0.00441079	0.0502923
ENSMUSG00000010307	Tmem86a	transmembrane protein 86A	1692.46	1327.3	626.358	687.627	0.433565	-1.20568	0.000221649	0.00417686
ENSMUSG00000057963	Itpk1	inositol 1,3,4-triphosphate 5/6 kinase	1501.5	1583.31	668.595	674.606	0.433887	-1.20461	0.000375294	0.00659347
ENSMUSG00000024014	Pim1	proviral integration site 1	357.635	422.759	162.923	177.558	0.434755	-1.20173	0.000285887	0.00521057
ENSMUSG00000018449	Rpain	RPA interacting protein	1278.44	979.377	501.969	484.719	0.435448	-1.19943	0.000625152	0.0103366
ENSMUSG00000020105	Lrig3	leucine-rich repeats and immunoglobulin-like domains 3	68.4249	69.7118	28.1234	32.3675	0.436347	-1.19645	0.001034	0.0156549
ENSMUSG00000034459	Ifit1	interferon-induced protein with tetratricopeptide repeats 1	56.272	62.6769	19.6215	32.4707	0.436355	-1.19643	0.00179633	0.0247914
ENSMUSG00000074284	Gm10658	predicted gene 10658	177.077	176.921	89.9513	65.1329	0.436571	-1.19571	0.00313536	0.0385478
ENSMUSG00000028124	Gclm	glutamate-cysteine ligase, modifier subunit	11945.7	11091.2	5575.22	4529.43	0.437089	-1.194	0.000277542	0.00508564
ENSMUSG00000032591	Mst1	macrophage stimulating 1 (hepatocyte growth factor-like)	5811.78	4652.65	2707.27	1888.98	0.437687	-1.19203	0.000414349	0.0072159
ENSMUSG00000038150	Ormdl3	ORM1-like 3 (S, cerevisiae)	1747.9	1279.93	701.838	630.232	0.438373	-1.18977	0.00092549	0.0142561
ENSMUSG00000048782	Insc	inscuteable homolog (Drosophila)	1591.24	1304.37	558.132	719.89	0.439767	-1.18519	0.000329684	0.00590071
ENSMUSG00000064105	Cnnm2	cyclin M2	79.9408	89.9173	41.9142	33.2736	0.441114	-1.18078	0.00153815	0.0218081
ENSMUSG00000062963	Ufc1	ubiquitin-fold modifier conjugating enzyme 1	4738.71	3309	1882.19	1684.27	0.441581	-1.17925	0.00429622	0.0491974
ENSMUSG00000020743	Mif4gd	MIF4G domain containing	1784.28	1293.14	830.421	535.425	0.442273	-1.17699	0.00772236	0.077218
ENSMUSG00000073600	Gm1614	predicted gene 1614	22.6752	34.385	11.382	13.9883	0.443063	-1.17442	0.00835772	0.0816617
ENSMUSG00000001025	S100a6	S100 calcium binding protein A6 (calcyclin)	645.262	457.502	233.138	257.887	0.443659	-1.17248	0.00232222	0.0305516
ENSMUSG00000037108	Zcwpw1	zinc finger, CW type with PWWP domain 1	573.859	850.871	316.857	317.89	0.443974	-1.17145	0.00497105	0.0553844
ENSMUSG00000024424	Ttc39c	tetratricopeptide repeat domain 39C	1045.48	862.506	558.298	292.243	0.444243	-1.17058	0.0037948	0.0446056
ENSMUSG00000022656	Pvrl3	poliovirus receptor-related 3	4087.34	4326.01	2010.13	1743.51	0.444593	-1.16944	0.00033216	0.00593612
ENSMUSG00000033307	Mif	macrophage migration inhibitory factor	4884.15	3550.55	2245.06	1524.03	0.445285	-1.1672	0.0058424	0.0627782
ENSMUSG00000006715	Gmnn	geminin	833.511	947.7	400.258	396.093	0.445513	-1.16646	0.000555786	0.00931225
ENSMUSG00000033114	Slc35d2	solute carrier family 35, member D2	468.562	440.019	177.278	229.247	0.445819	-1.16547	0.000339676	0.00606136
ENSMUSG00000022790	Igsf11	immunoglobulin superfamily, member 11	448.36	472.123	221.283	191.344	0.446703	-1.16261	0.000519725	0.00875102
ENSMUSG00000038068	Rnf144b	ring finger protein 144B	752.47	992.245	394.873	388.639	0.447511	-1.16	0.000241199	0.00449209
ENSMUSG00000038967	Pdk2	pyruvate dehydrogenase kinase, isoenzyme 2	2904.09	2443.91	1491.5	912.002	0.44786	-1.15888	0.000874936	0.0136625
ENSMUSG00000026458	Ppfia4	protein tyrosine phosphatase, receptor type, f polypeptide (PTPRF), interacting protein (liprin), alpha 4	25.6611	25.2435	10.0953	12.7935	0.448029	-1.15834	0.00358633	0.042835
ENSMUSG00000036503	Rnf13	ring finger protein 13	2134.57	2257.92	1119.3	861.778	0.449447	-1.15378	0.000435333	0.00751556
ENSMUSG00000049038	Mterfd3	MTERF domain containing 3	82.5682	97.0099	41.8825	39.1259	0.449527	-1.15352	0.00528697	0.0582787
ENSMUSG00000020572	Nampt	nicotinamide phosphoribosyltransferase	772.095	765.021	387.44	307.073	0.45025	-1.1512	0.000495003	0.00841786
ENSMUSG00000070044	Fam149a	family with sequence similarity 149, member A	206.934	198.312	87.3681	96.0039	0.450884	-1.14917	0.00051931	0.00875021
ENSMUSG00000020142	Slc1a4	solute carrier family 1 (glutamate/neutral amino acid transporter), member 4	1181.92	1362.5	571.712	580.183	0.451123	-1.14841	0.000292622	0.00530496
ENSMUSG00000020038	Cry1	cryptochrome 1 (photolyase-like)	393.605	417.997	201.786	165.674	0.45118	-1.14823	0.000627259	0.0103582
ENSMUSG00000024778	Fas	Fas (TNF receptor superfamily member 6)	1861.21	1344.16	797.077	654.951	0.45139	-1.14755	0.00287919	0.0360291
ENSMUSG00000045466	Zfp956	zinc finger protein 956	78.3786	75.7284	34.2479	35.6089	0.451692	-1.14659	0.00282504	0.0354816
ENSMUSG00000021620	Acot12	acyl-CoA thioesterase 12	4780.07	4553.86	2547.54	1689.55	0.452372	-1.14442	0.000694718	0.0112991
ENSMUSG00000024039	Cbs	cystathionine beta-synthase	19480.2	17766.8	11184.6	5753.25	0.453184	-1.14183	0.00154394	0.0218642
ENSMUSG00000021364	Elovl2	elongation of very long chain fatty acids (FEN1/Elo2, SUR4/Elo3, yeast)-like 2	13196.6	14733.1	7307.73	5396.02	0.453275	-1.14154	0.00045523	0.00780824
ENSMUSG00000019952	Poc1b	POC1 centriolar protein homolog B (Chlamydomonas)	441.796	370.303	166.287	203.431	0.45362	-1.14044	0.000827142	0.0130528
ENSMUSG00000055312	0610012H03Rik	RIKEN cDNA 0610012H03 gene	312.204	261.129	169.99	91.4691	0.45446	-1.13777	0.00379362	0.0446056
ENSMUSG00000060791	Gmfg	glia maturation factor, gamma	586.571	453.676	208.327	266.715	0.455006	-1.13604	0.00154783	0.0219064
ENSMUSG00000039349	C130074G19Rik	RIKEN cDNA C130074G19 gene	2963.42	2695.99	1685.26	900.5	0.455326	-1.13503	0.000964982	0.0147881
ENSMUSG00000024070	Prkd3	protein kinase D3	1914.45	2429.28	918.049	1069	0.455838	-1.13341	0.000246732	0.00459157
ENSMUSG00000046245	Pilra	paired immunoglobin-like type 2 receptor alpha	386.092	355.524	115.212	224.57	0.45648	-1.13138	0.000500941	0.00850673
ENSMUSG00000037664	Cdkn1c	cyclin-dependent kinase inhibitor 1C (P57)	2548.62	2188.49	1184.12	986.464	0.456592	-1.13102	0.000640809	0.0105663
ENSMUSG00000027478	Dnmt3b	DNA methyltransferase 3B	135.561	145.194	58.0507	70.6766	0.456871	-1.13014	0.000733861	0.011855
ENSMUSG00000021591	Glrx	glutaredoxin	1692.29	1525.83	996.235	480.264	0.45724	-1.12898	0.00470063	0.0527903
ENSMUSG00000025153	Fasn	fatty acid synthase	3793.54	5228.28	2267.46	1876.72	0.457768	-1.12731	0.0016352	0.0229137
ENSMUSG00000022584	Ly6c2	lymphocyte antigen 6 complex, locus C2	179.938	212.479	65.4706	114.845	0.457839	-1.12709	0.00282344	0.0354802
ENSMUSG00000002083	Bbc3	BCL2 binding component 3	311.018	260.003	122.577	139.985	0.458159	-1.12608	0.00261387	0.0334452
ENSMUSG00000003721	Insig2	insulin induced gene 2	16249.3	15532.5	8239.92	6385.18	0.458563	-1.12481	0.000645457	0.0106282
ENSMUSG00000043496	Tril	TLR4 interactor with leucine-rich repeats	21.8047	23.8747	8.62832	12.4009	0.458711	-1.12434	0.00583961	0.0627775
ENSMUSG00000001403	Ube2c	ubiquitin-conjugating enzyme E2C	701.03	841.732	326.986	383.42	0.458848	-1.12391	0.000446583	0.00768199
ENSMUSG00000025188	Hps1	Hermansky-Pudlak syndrome 1 homolog (human)	172.331	127.289	62.718	75.5882	0.459933	-1.1205	0.00161675	0.022717
ENSMUSG00000020534	Shmt1	serine hydroxymethyltransferase 1 (soluble)	7129.03	5819.05	3515.87	2487.78	0.462048	-1.11389	0.000946915	0.0145486
ENSMUSG00000071451	Psmg4	proteasome (prosome, macropain) assembly chaperone 4	708.764	544.104	279.084	302.016	0.462149	-1.11357	0.00239579	0.0313607
ENSMUSG00000026259	Ngef	neuronal guanine nucleotide exchange factor	818.804	582.99	339.412	311.331	0.462562	-1.11228	0.00367223	0.043546
ENSMUSG00000024818	Slc25a45	solute carrier family 25, member 45	417.118	427.633	175.049	217.13	0.462594	-1.11218	0.00083007	0.0130817
ENSMUSG00000030935	Acsm3	acyl-CoA synthetase medium-chain family member 3	781.418	929.264	513.537	280.85	0.462792	-1.11156	0.00248072	0.0322602
ENSMUSG00000000594	Gm2a	GM2 ganglioside activator protein	855.197	704.764	354.878	370.923	0.463605	-1.10903	0.000656895	0.0107794
ENSMUSG00000037190	Cyb561d2	cytochrome b-561 domain containing 2	193.952	140.5	78.6901	76.9502	0.463691	-1.10876	0.00319933	0.0391328
ENSMUSG00000024308	Tapbp	TAP binding protein	8194.49	6123.21	3090.3	3574.6	0.463819	-1.10837	0.00065736	0.0107796
ENSMUSG00000026437	Cdk18	cyclin-dependent kinase 18	447.252	392.123	224.727	166.018	0.463891	-1.10814	0.00142726	0.0204422
ENSMUSG00000031883	Car7	carbonic anhydrase 7	78.7894	71.774	32.1334	37.9772	0.463986	-1.10785	0.00968727	0.0913481
ENSMUSG00000032380	Dapk2	death-associated protein kinase 2	723.085	534.144	323.023	262.592	0.464146	-1.10735	0.00208401	0.0279224
ENSMUSG00000034413	Neurl1b	neuralized homolog 1b (Drosophila)	59.9179	80.5429	30.4079	35.144	0.465051	-1.10454	0.00109529	0.0164473
ENSMUSG00000024399	Ltb	lymphotoxin B	106.027	86.1051	31.0316	58.734	0.465482	-1.1032	0.00746591	0.0755628
ENSMUSG00000060002	Chpt1	choline phosphotransferase 1	1036.11	964.535	449.267	486.342	0.465986	-1.10164	0.000751187	0.0120567
ENSMUSG00000066682	Pilrb2	paired immunoglobin-like type 2 receptor beta 2	93.9112	80.3329	34.7869	46.7722	0.466379	-1.10042	0.00543792	0.0596123
ENSMUSG00000040466	Blvrb	biliverdin reductase B (flavin reductase (NADPH))	5174.26	3532.05	1985.54	2092.09	0.466663	-1.09955	0.00900545	0.0864552
ENSMUSG00000023094	Msrb2	methionine sulfoxide reductase B2	1915.17	1516.38	846.028	761.439	0.466774	-1.09921	0.00175209	0.0243074
ENSMUSG00000054200	O3far1	omega-3 fatty acid receptor 1	137.468	155.834	76.7519	60.673	0.466918	-1.09876	0.00513672	0.0569379
ENSMUSG00000030148	Clec4a2	C-type lectin domain family 4, member a2	357.84	333.665	143.973	180.376	0.467363	-1.09739	0.00204006	0.0274259
ENSMUSG00000045100	Slc25a26	solute carrier family 25 (mitochondrial carrier, phosphate carrier), member 26	162.596	130.046	77.4333	59.8967	0.467622	-1.09658	0.00452219	0.0512686
ENSMUSG00000061175	Fnip2	folliculin interacting protein 2	438.248	571.112	217.741	256.857	0.46854	-1.09376	0.000507979	0.00858962
ENSMUSG00000071068	Treml2	triggering receptor expressed on myeloid cells-like 2	29.3486	39.873	11.9154	20.6568	0.46886	-1.09277	0.00541559	0.0594221
ENSMUSG00000042271	Nxt2	nuclear transport factor 2-like export factor 2	341.581	400.492	162.65	186.789	0.469229	-1.09164	0.000772445	0.0123117
ENSMUSG00000038775	Vill	villin-like	812.824	676.363	281.047	420.48	0.469364	-1.09122	0.000859825	0.0134749
ENSMUSG00000062300	Pvrl2	poliovirus receptor-related 2	1115.43	852.145	499.748	427.744	0.469715	-1.09014	0.00120744	0.0177955
ENSMUSG00000033898	Cfhr2	complement factor H-related 2	6880.12	6872.24	4002.97	2488.07	0.470368	-1.08814	0.00118875	0.0175635
ENSMUSG00000046908	Ltb4r1	leukotriene B4 receptor 1	85.9957	88.8476	33.1454	49.4934	0.47094	-1.08639	0.00753961	0.07586
ENSMUSG00000050103	Agmo	alkylglycerol monooxygenase	1617.17	1536.92	834.301	660.378	0.472227	-1.08245	0.0010961	0.0164491
ENSMUSG00000031451	Gas6	growth arrest specific 6	1145.58	845.381	522.138	422.73	0.472897	-1.0804	0.0027272	0.0344339
ENSMUSG00000022679	Mpv17l	Mpv17 transgene, kidney disease mutant-like	142.321	166.856	84.7655	62.0304	0.473158	-1.07961	0.00342695	0.0413869
ENSMUSG00000028553	Angptl3	angiopoietin-like 3	17832.4	21565.1	10636.5	8076.05	0.473328	-1.07909	0.000826626	0.0130528
ENSMUSG00000022887	Masp1	mannan-binding lectin serine peptidase 1	2377.72	3231.16	1168.43	1497.64	0.473652	-1.0781	0.00122896	0.0180681
ENSMUSG00000031299	Pdha1	pyruvate dehydrogenase E1 alpha 1	5097.9	5773.59	2618.56	2550.16	0.473769	-1.07774	0.00073653	0.011882
ENSMUSG00000051375	Pcdh1	protocadherin 1	966.519	765.253	464.254	359.887	0.474217	-1.07638	0.00142513	0.0204241
ENSMUSG00000024222	Fkbp5	FK506 binding protein 5	1872.86	1477.84	848.077	747.264	0.474432	-1.07573	0.00116599	0.017313
ENSMUSG00000046329	Slc25a23	solute carrier family 25 (mitochondrial carrier; phosphate carrier), member 23	13128.2	13507.4	6925.84	5759.1	0.474577	-1.07529	0.000923956	0.0142451
ENSMUSG00000037278	Tmem97	transmembrane protein 97	2419.64	2043.64	1246.06	881.239	0.474955	-1.07414	0.00156184	0.0220785
ENSMUSG00000043091	Tuba1c	tubulin, alpha 1C	923.72	759.85	394.048	409.182	0.475393	-1.07281	0.00115143	0.0171287
ENSMUSG00000020919	Stat5b	signal transducer and activator of transcription 5B	951.892	908.974	430.702	460.175	0.477041	-1.06782	0.000822339	0.0130028
ENSMUSG00000024397	Aif1	allograft inflammatory factor 1	1084.78	1001.83	340.383	658.78	0.477087	-1.06768	0.000719135	0.0116328
ENSMUSG00000028381	Ugcg	UDP-glucose ceramide glucosyltransferase	3997.29	4336.1	1961.9	2033.44	0.477745	-1.06569	0.000809678	0.0128512
ENSMUSG00000043085	Tmem82	transmembrane protein 82	282.094	257.43	168.681	90.1402	0.478074	-1.06469	0.00367177	0.043546
ENSMUSG00000046027	Stard5	StAR-related lipid transfer (START) domain containing 5	6085.11	4694.56	3229.57	1942.13	0.478094	-1.06463	0.00927412	0.0884301
ENSMUSG00000007050	Lsm2	LSM2 homolog, U6 small nuclear RNA associated (S, cerevisiae)	1466.74	1183.36	674.106	597.83	0.478256	-1.06414	0.00198357	0.0268708
ENSMUSG00000078584	AU022252	expressed sequence AU022252	896.286	972.006	474.463	422.678	0.478513	-1.06337	0.00113833	0.0169549
ENSMUSG00000053730	Tmem39b	transmembrane protein 39b	381.955	286.605	153.394	168.278	0.479408	-1.06068	0.00550338	0.0601092
ENSMUSG00000001123	Lgals9	lectin, galactose binding, soluble 9	20043.5	15714.1	9674.06	7533.07	0.479518	-1.06034	0.00148113	0.0211125
ENSMUSG00000047067	Dusp28	dual specificity phosphatase 28	412.447	304.58	182.691	162.536	0.479754	-1.05963	0.003085	0.0381645
ENSMUSG00000040964	Arhgef10l	Rho guanine nucleotide exchange factor (GEF) 10-like	562.846	427.789	226.553	250.432	0.47976	-1.05961	0.00131719	0.0191764
ENSMUSG00000028199	Cryz	crystallin, zeta	4004.53	3656.6	1994.64	1694	0.47978	-1.05956	0.00136498	0.0197517
ENSMUSG00000010142	Tnfrsf13b	tumor necrosis factor receptor superfamily, member 13b	218.713	183.066	71.4187	122.459	0.480777	-1.05656	0.00788104	0.0783053
ENSMUSG00000024610	Cd74	CD74 antigen (invariant polypeptide of major histocompatibility complex, class II antigen-associated)	2423.84	2171.41	980.656	1240.09	0.481531	-1.0543	0.000854904	0.0134111
ENSMUSG00000031119	Gpc4	glypican 4	976.633	1004.72	529.765	428.121	0.481763	-1.05361	0.0014117	0.0202802
ENSMUSG00000020309	Chac2	ChaC, cation transport regulator homolog 2 (E, coli)	1017	982.978	600.593	367.445	0.482356	-1.05183	0.00263138	0.0336088
ENSMUSG00000040957	Cables1	CDK5 and Abl enzyme substrate 1	66.4284	76.0319	41.8123	27.2099	0.482838	-1.05039	0.00723848	0.0738888
ENSMUSG00000043789	Vwce	von Willebrand factor C and EGF domains	258.597	300.21	173.321	97.6925	0.483335	-1.0489	0.00270501	0.0342599
ENSMUSG00000074264	Amy1	amylase 1, salivary	5997.08	5420.46	3396.96	2149.46	0.484097	-1.04663	0.00199089	0.0269012
ENSMUSG00000042215	Bag2	BCL2-associated athanogene 2	119.123	140.238	64.7158	61.415	0.484611	-1.0451	0.00803915	0.0793808
ENSMUSG00000037860	Aim2	absent in melanoma 2	580.196	675.923	272.684	338.235	0.484626	-1.04506	0.00243217	0.0316909
ENSMUSG00000046352	Gjb2	gap junction protein, beta 2	2881.42	2588.79	1661.81	998.633	0.48467	-1.04493	0.00220115	0.0292947
ENSMUSG00000074604	Mgst2	microsomal glutathione S-transferase 2	437.603	424.723	207.645	212.109	0.485044	-1.04381	0.00945016	0.0896789
ENSMUSG00000029322	Plac8	placenta-specific 8	1825.79	1394.66	576.416	991.612	0.485103	-1.04364	0.00621271	0.0655478
ENSMUSG00000075602	Ly6a	lymphocyte antigen 6 complex, locus A	408.699	320.337	209.264	146.37	0.486102	-1.04067	0.00734832	0.0748181
ENSMUSG00000018166	Erbb3	v-erb-b2 erythroblastic leukemia viral oncogene homolog 3 (avian)	653.435	852.936	446.618	288.287	0.486201	-1.04037	0.00500393	0.0556988
ENSMUSG00000083594	Gm13722	predicted gene 13722	140.655	105.55	62.3829	57.9449	0.486984	-1.03805	0.00466865	0.0525301
ENSMUSG00000032369	Plscr1	phospholipid scramblase 1	773.828	685.556	358.811	354.755	0.487212	-1.03738	0.0018291	0.025142
ENSMUSG00000090231	Cfb	complement factor B	1512.04	1398.43	759.611	665.616	0.487964	-1.03515	0.00162206	0.0227546
ENSMUSG00000070594	Gm4788	predicted gene 4788	882.777	937.812	576.344	315.754	0.488333	-1.03406	0.0026073	0.033381
ENSMUSG00000066637	Ttc32	tetratricopeptide repeat domain 32	504.422	427.494	250.902	206.119	0.488681	-1.03303	0.00425007	0.0487714
ENSMUSG00000025176	Hoga1	4-hydroxy-2-oxoglutarate aldolase 1	14268.2	11399.3	7758.66	4835.75	0.488967	-1.03219	0.00485509	0.0543206
ENSMUSG00000001891	Ugp2	UDP-glucose pyrophosphorylase 2	11879.3	12618.4	7000.95	5024.72	0.48919	-1.03153	0.00169317	0.0235721
ENSMUSG00000000682	Cd52	CD52 antigen	1609.16	1265.96	494.792	918.668	0.489802	-1.02973	0.00721864	0.0738126
ENSMUSG00000073910	Mob3b	MOB kinase activator 3B	511.227	453.927	246.351	228.903	0.490669	-1.02718	0.00196571	0.0267122
ENSMUSG00000028973	Abcb8	ATP-binding cassette, sub-family B (MDR/TAP), member 8	1479.52	1238.94	760.072	581.147	0.49164	-1.02433	0.00265983	0.0338183
ENSMUSG00000041079	Rwdd2b	RWD domain containing 2B	334.078	298.055	164.827	147.472	0.492294	-1.02241	0.0048817	0.0545417
ENSMUSG00000025498	Irf7	interferon regulatory factor 7	1233.46	950.496	423.515	655.717	0.492353	-1.02223	0.00309677	0.0382903
ENSMUSG00000032038	St3gal4	ST3 beta-galactoside alpha-2,3-sialyltransferase 4	1632.82	1174.23	741.419	649.474	0.493733	-1.0182	0.00603507	0.06427
ENSMUSG00000026509	Capn2	calpain 2	1087.85	1061.24	462.215	602.887	0.493824	-1.01793	0.00110138	0.0165076
ENSMUSG00000029373	Pf4	platelet factor 4	725.294	622.699	272.299	395.89	0.493891	-1.01774	0.00292392	0.0364742
ENSMUSG00000015437	Gzmb	granzyme B	117.478	147.451	63.2744	68.118	0.49421	-1.0168	0.00736941	0.0749678
ENSMUSG00000021271	Zfp839	zinc finger protein 839	131.236	167.676	71.3948	76.8656	0.494258	-1.01666	0.00229405	0.0303282
ENSMUSG00000015714	Lass2	LAG1 homolog, ceramide synthase 2	13283	11139.3	6621.49	5492.21	0.49426	-1.01666	0.00209966	0.0280849
ENSMUSG00000026879	Gsn	gelsolin	2613.9	2228.69	1294.72	1112.2	0.495273	-1.0137	0.00253317	0.032746
ENSMUSG00000054717	Hmgb2	high mobility group box 2	405.986	517.961	193.99	265.262	0.495287	-1.01366	0.00110788	0.0165842
ENSMUSG00000004233	Wars2	tryptophanyl tRNA synthetase 2 (mitochondrial)	118.198	155.435	67.1706	69.059	0.496115	-1.01125	0.00360017	0.042919
ENSMUSG00000019960	Dusp6	dual specificity phosphatase 6	880.883	1134.09	484.037	521.587	0.497324	-1.00774	0.00127158	0.0185917
ENSMUSG00000031521	Aga	aspartylglucosaminidase	901.021	746.983	457.654	365.309	0.497609	-1.00691	0.00354712	0.0425358
ENSMUSG00000052906	Ubxn8	UBX domain protein 8	428.316	363.551	195.49	200.222	0.497937	-1.00596	0.00257434	0.0330812
ENSMUSG00000002731	Prkra	protein kinase, interferon inducible double stranded RNA dependent activator	556.979	435.118	221.853	274.34	0.498336	-1.00481	0.00314995	0.0386675
ENSMUSG00000041650	Pcca	propionyl-Coenzyme A carboxylase, alpha polypeptide	6663.57	6585.59	3877.06	2764.65	0.499552	-1.00129	0.00273469	0.0345103
ENSMUSG00000023938	Aars2	alanyl-tRNA synthetase 2, mitochondrial (putative)	275.287	248.213	142.981	119.523	0.499678	-1.00093	0.00360824	0.0429677

## Sheet: Up-regulated
Ensembl gene id	Gene name	Description	WT.1	WT.2	KO.1	KO.2	KO/WT	log2(KO/WT)	p-value	Adj_p-value
ENSMUSG00000026226	Spata3	spermatogenesis associated 3	0	0	21.693	22.0539	100000	100000	0.000453658	0.00778687
ENSMUSG00000042671	Rgs8	regulator of G-protein signaling 8	0	0	20.3564	18.6722	100000	100000	0.00105331	0.0158768
ENSMUSG00000091405	Hist2h4	histone cluster 2, H4	0	0	61.1438	76.1592	100000	100000	1.88945e-18	2.59268e-16
ENSMUSG00000085833	Gm13003	predicted gene 13003	0	0	16.0138	20.5645	100000	100000	0.00319246	0.0390688
ENSMUSG00000030317	Timp4	tissue inhibitor of metalloproteinase 4	0	0	4.93251	9.74489	100000	100000	0.00860383	0.083574
ENSMUSG00000043126	D830039M14Rik	RIKEN cDNA D830039M14 gene	0	0	5.71219	8.65989	100000	100000	0.00348238	0.0418446
ENSMUSG00000090843	Gm17673	predicted gene, 17673	0	0	3.18326	3.69042	100000	100000	0.00760564	0.0763314
ENSMUSG00000062727	Hist1h2bk	histone cluster 1, H2bk	0	0	37.014	19.8051	100000	100000	0.00138896	0.020038
ENSMUSG00000071478	Hist1h2ad	histone cluster 1, H2ad	0	0	96.745	114.588	100000	100000	8.47664e-12	6.44549e-10
ENSMUSG00000069267	Hist1h3b	histone cluster 1, H3b	0	0	25.1301	16.6921	100000	100000	0.00198414	0.0268708
ENSMUSG00000088758	U6	U6 spliceosomal RNA	0	0	410.551	284.762	100000	100000	4.60175e-08	1.92757e-06
ENSMUSG00000024225	Clps	colipase, pancreatic	0	0	33.9078	31.9068	100000	100000	0.000759064	0.0121401
ENSMUSG00000045053	Kcng3	potassium voltage-gated channel, subfamily G, member 3	0	0	5.92335	5.91053	100000	100000	8.46069e-05	0.00180221
ENSMUSG00000086095	Gm15328	predicted gene 15328	0	0	7.76027	6.66299	100000	100000	3.85853e-05	0.000900551
ENSMUSG00000046610	5330437I02Rik	RIKEN cDNA 5330437I02 gene	0	0	2.9538	3.4244	100000	100000	0.00760564	0.0763314
ENSMUSG00000036131	Frmd7	FERM domain containing 7	0	0	7.46378	10.7416	100000	100000	0.000140818	0.00279019
ENSMUSG00000041710	Trpc5	transient receptor potential cation channel, subfamily C, member 5	0	0	3.09662	8.69879	100000	100000	0.00907918	0.0869199
ENSMUSG00000056752	Dnahc9	dynein, axonemal, heavy chain 9	0	1.19226	151.511	193.794	288.679	8.17332	1.24556e-34	4.72046e-32
ENSMUSG00000050440	Hamp	hepcidin antimicrobial peptide	15.8863	23.7814	6325.18	2710.47	227.029	7.82673	2.3743e-06	7.21231e-05
ENSMUSG00000060678	Hist1h4c	histone cluster 1, H4c	3.94141	0	401.248	290.385	174.811	7.44965	1.51427e-17	1.9438e-15
ENSMUSG00000031849	Comp	cartilage oligomeric matrix protein	1.92601	3.29507	362.238	337.501	133.561	7.06136	8.47395e-47	6.13103e-44
ENSMUSG00000080741	Gm11398	predicted gene 11398	58.3822	41.6174	5050.28	5252.69	102.659	6.68172	1.71691e-53	1.7823e-50
ENSMUSG00000024112	Cacna1h	calcium channel, voltage-dependent, T type, alpha 1H subunit	8.57773	14.675	745.107	1436.35	93.4799	6.54658	1.08445e-07	4.28681e-06
ENSMUSG00000092035	Peg10	paternally expressed 10	80.9099	220.892	9105.15	10239.9	63.8802	5.9973	5.80595e-59	1.26021e-55
ENSMUSG00000075032	Hist1h3i	histone cluster 1, H3i	3.22331	0	123.471	69.6366	59.6845	5.89928	6.58824e-06	0.000183932
ENSMUSG00000061482	Hist1h4d	histone cluster 1, H4d	0	3.3887	117.569	83.3895	59.1164	5.88549	1.52885e-07	5.84981e-06
ENSMUSG00000060981	Hist1h4h	histone cluster 1, H4h	22.895	27.9781	1585.83	1181.3	54.2054	5.76036	6.19534e-24	1.35706e-21
ENSMUSG00000051627	Hist1h1e	histone cluster 1, H1e	20.8136	5.34128	599.035	727.525	50.5282	5.65902	3.80157e-33	1.31545e-30
ENSMUSG00000070392	Gm20634	predicted gene 20634	4.7401	6.30738	347.695	210.062	50.316	5.65294	5.70396e-10	3.1969e-08
ENSMUSG00000060093	Hist1h4a	histone cluster 1, H4a	10.4254	0	251.842	273.357	50.1814	5.64908	3.43744e-16	4.02316e-14
ENSMUSG00000069265	Hist1h3a	histone cluster 1, H3a	5.83093	0	110.672	180.883	49.8034	5.63817	1.00275e-07	3.99028e-06
ENSMUSG00000020312	Shc2	SHC (Src homology 2 domain containing) transforming protein 2	8.9436	8.03301	435.953	399.07	49.0127	5.61508	8.98481e-44	5.36304e-41
ENSMUSG00000074398	Gm15441	predicted gene 15441	12.1209	5.7602	497.294	317.813	45.4223	5.50533	1.98201e-11	1.41261e-09
ENSMUSG00000069273	Hist1h3e	histone cluster 1, H3e	3.72454	3.18602	163.878	141.33	44.0094	5.45974	1.43648e-16	1.71486e-14
ENSMUSG00000048138	Dmrt2	doublesex and mab-3 related transcription factor 2	0.66334	1.13486	34.7951	38.9505	40.8684	5.35291	1.41116e-12	1.15387e-10
ENSMUSG00000028222	Calb1	calbindin 1	0	7.23782	100.007	187.483	39.5885	5.30701	1.6894e-05	0.000432791
ENSMUSG00000071516	Hist1h2ai	histone cluster 1, H2ai	0	2.55861	52.1264	43.9082	37.4148	5.22554	2.06907e-08	9.06441e-07
ENSMUSG00000050132	Sarm1	sterile alpha and HEAT/Armadillo motif containing 1	6.8584	2.66672	203.545	145.406	36.5023	5.18992	7.21086e-17	8.82905e-15
ENSMUSG00000093507	Gm20627	predicted gene 20627	2.20362	1.88501	86.6922	58.5935	35.4102	5.14609	1.10806e-08	5.06819e-07
ENSMUSG00000029816	Gpnmb	glycoprotein (transmembrane) nmb	10.2479	16.8311	572.204	379.439	35.0246	5.1303	6.84602e-13	5.75548e-11
ENSMUSG00000081058	Hist2h3c2	histone cluster 2, H3c2	36.7039	9.15747	986.918	587.939	34.2146	5.09654	1.06357e-08	4.87406e-07
ENSMUSG00000072949	Acot1	acyl-CoA thioesterase 1	119.835	111.905	4527.63	3345.14	33.8538	5.08125	1.43572e-22	2.76445e-20
ENSMUSG00000083079	Amy2b	amylase 2b	4.40724	1.88501	152.852	59.2038	33.5833	5.06967	0.0019747	0.0268089
ENSMUSG00000029384	2010109A12Rik	RIKEN cDNA 2010109A12 gene	2.83581	0	48.9311	45.556	33.1909	5.05272	3.64421e-05	0.000856389
ENSMUSG00000062808	Hist1h3d	histone cluster 1, H3d	7.4789	5.3313	187.548	214.052	31.2366	4.96516	4.32713e-22	8.07146e-20
ENSMUSG00000024049	Myom1	myomesin 1	9.59587	19.153	663.1	224.385	30.7704	4.94347	0.00540171	0.0593244
ENSMUSG00000085331	Gm11274	predicted gene 11274	3.23671	5.53746	123.984	141.645	30.1688	4.91498	1.21187e-09	6.42992e-08
ENSMUSG00000069268	Hist1h2bf	histone cluster 1, H2bf	0	2.88885	44.2864	43.0276	30.1278	4.91302	0.000426213	0.0073857
ENSMUSG00000074274	D930028M14Rik	RIKEN cDNA D930028M14 gene	1.55842	0	21.5121	25.0353	29.752	4.89491	0.000119767	0.00242952
ENSMUSG00000035576	L3mbtl1	l(3)mbt-like (Drosophila)	0	3.94595	62.8797	52.3842	29.1181	4.86384	1.07183e-06	3.50082e-05
ENSMUSG00000025783	4930412O13Rik	RIKEN cDNA 4930412O13 gene	0	1.52637	23.3994	20.7575	28.8373	4.84986	0.000595885	0.00988697
ENSMUSG00000041771	Slc24a4	solute carrier family 24 (sodium/potassium/calcium exchanger), member 4	6.66178	7.97801	197.25	216.621	28.1706	4.81612	9.7737e-28	2.50921e-25
ENSMUSG00000069305	Hist1h4n	histone cluster 1, H4n	7.2412	0	123.696	78.2197	27.7789	4.79592	8.03279e-07	2.72592e-05
ENSMUSG00000027869	Hsd3b6	hydroxy-delta-5-steroid dehydrogenase, 3 beta- and steroid delta-isomerase 6	0	2.39166	31.8402	33.5573	27.256	4.7685	2.25169e-08	9.81046e-07
ENSMUSG00000074240	Cib3	calcium and integrin binding family member 3	14.46	2.06155	268.632	172.218	26.5846	4.73252	7.6135e-09	3.60674e-07
ENSMUSG00000000901	Mmp11	matrix metallopeptidase 11	198.539	149.655	5548.33	3634.81	26.2813	4.71597	2.06047e-11	1.45549e-09
ENSMUSG00000047246	Hist1h2be	histone cluster 1, H2be	4.52575	1.10611	75.1901	73.0624	26.2257	4.71291	4.59587e-18	6.16466e-16
ENSMUSG00000084497	U6	U6 spliceosomal RNA	0	53.2703	607.108	784.805	26.0442	4.70289	9.92016e-10	5.31062e-08
ENSMUSG00000089769	Gm16574	predicted gene 16574	0	3.57519	28.8464	63.6688	25.7902	4.68875	0.0031183	0.0384569
ENSMUSG00000079051	Gm14025	predicted gene 14025	0	0.715999	9.82095	8.34603	25.2924	4.66063	0.00160949	0.0226582
ENSMUSG00000027238	Frmd5	FERM domain containing 5	1.47955	0.632815	30.3798	22.539	24.9614	4.64163	1.19914e-08	5.43277e-07
ENSMUSG00000046240	Hepacam	hepatocyte cell adhesion molecule	0.935893	0	13.4033	9.85034	24.7519	4.62947	1.0298e-06	3.39607e-05
ENSMUSG00000038651	Sycp2l	synaptonemal complex protein 2-like	2.09819	0	21.7222	30.2197	24.6583	4.624	0.000663052	0.0108543
ENSMUSG00000069855	Slc47a2	solute carrier family 47, member 2	0	0.886067	9.29398	12.6236	24.6551	4.62381	0.00219175	0.0291858
ENSMUSG00000073018	Gm1070	predicted gene 1070	0.574063	0	8.12235	6.04205	24.58	4.61941	0.000560724	0.00937524
ENSMUSG00000036211	Hist1h1t	histone cluster 1, H1t	0	1.46508	23.0509	12.3339	24.0775	4.58962	0.00203979	0.0274259
ENSMUSG00000043747	1520401A03Rik	RIKEN cDNA 1520401A03 gene	1.06744	0.456551	16.9449	19.5132	23.8344	4.57497	3.65409e-08	1.5524e-06
ENSMUSG00000082789	Gm13284	predicted gene 13284	0	2.54882	26.7347	33.0114	23.3646	4.54625	0.00307202	0.0380433
ENSMUSG00000037418	Best1	bestrophin 1	0	1.11865	13.0875	13.0396	23.2809	4.54108	0.00297507	0.0369963
ENSMUSG00000069270	Hist1h2ac	histone cluster 1, H2ac	8.15437	6.97536	198.065	150.802	22.9774	4.52215	1.39194e-20	2.24553e-18
ENSMUSG00000022652	Morc1	microrchidia 1	0	0.436642	5.81302	4.24142	22.9543	4.52069	0.00302568	0.0375832
ENSMUSG00000022853	Ehhadh	enoyl-Coenzyme A, hydratase/3-hydroxyacyl Coenzyme A dehydrogenase	3684.77	3471.48	96989.4	63472.1	22.3449	4.48187	8.78103e-11	5.56117e-09
ENSMUSG00000069300	Hist1h2bj	histone cluster 1, H2bj	3.36254	0	31.3307	40.9791	21.4202	4.4209	0.00187706	0.0256682
ENSMUSG00000069306	Hist1h4m	histone cluster 1, H4m	0	6.57658	80.9212	59.6243	21.3033	4.41301	5.08329e-05	0.0011526
ENSMUSG00000036856	Wnt4	wingless-related MMTV integration site 4	46.7726	25.4031	929.771	571.042	20.7202	4.37297	2.72962e-08	1.1764e-06
ENSMUSG00000029452	Tmem116	transmembrane protein 116	6.0437	9.30576	171.44	140.612	20.2602	4.34058	1.79258e-17	2.28875e-15
ENSMUSG00000037855	Zfp365	zinc finger protein 365	1.86042	0.530475	24.8248	22.3292	19.6494	4.29641	1.64595e-08	7.34556e-07
ENSMUSG00000039431	Mtmr7	myotubularin related protein 7	30.1402	48.2593	820.364	701.24	19.3418	4.27365	5.81461e-31	1.77987e-28
ENSMUSG00000069310	Hist1h3c	histone cluster 1, H3c	2.4712	4.2278	83.5743	43.8056	18.9515	4.24424	0.000419101	0.00727645
ENSMUSG00000042708	1700012A16Rik	RIKEN cDNA 1700012A16 gene	3.72098	0.636596	46.2273	35.8656	18.769	4.23028	7.50894e-11	4.8455e-09
ENSMUSG00000024029	Tff3	trefoil factor 3, intestinal	240.002	297.147	7287.39	2697.48	18.5269	4.21155	0.00662187	0.0690108
ENSMUSG00000029168	Dpysl5	dihydropyrimidinase-like 5	9.26242	7.9232	155.559	159.914	18.2913	4.19308	5.14935e-15	5.44009e-13
ENSMUSG00000052565	Hist1h1d	histone cluster 1, H1d	19.5575	16.0327	341.818	308.766	18.215	4.18706	1.58347e-29	4.44788e-27
ENSMUSG00000040714	Klc3	kinesin light chain 3	8.17725	6.21772	125.105	136.9	18.1357	4.18076	9.97205e-18	1.30105e-15
ENSMUSG00000030361	Klrb1a	killer cell lectin-like receptor subfamily B member 1A	5.5037	2.35397	50.3314	86.8901	17.3975	4.12081	2.16259e-05	0.00054067
ENSMUSG00000049539	Hist1h1a	histone cluster 1, H1a	8.33659	7.13123	121.55	146.623	17.2751	4.11062	2.864e-11	1.95374e-09
ENSMUSG00000054679	Srsf12	serine/arginine-rich splicing factor 12	1.65272	0.706878	17.3955	23.3458	17.2019	4.1045	5.83576e-06	0.000165468
ENSMUSG00000067455	Hist1h4j	histone cluster 1, H4j	2.00626	5.14855	56.0804	66.6822	17.0993	4.09586	8.06484e-07	2.72592e-05
ENSMUSG00000039110	Mycbpap	MYCBP associated protein	1.43622	0	11.8951	12.7295	17.079	4.09415	0.00750499	0.0757576
ENSMUSG00000035211	Xrra1	X-ray radiation resistance associated 1	2.36694	0.506179	26.1383	21.9621	16.6793	4.05998	1.46575e-08	6.60307e-07
ENSMUSG00000021090	Lrrc9	leucine rich repeat containing 9	1.8534	0.528475	17.056	22.245	16.4378	4.03894	4.45404e-07	1.57548e-05
ENSMUSG00000071636	Rimbp3	RIMS binding protein 3	0.800167	0.228158	6.99538	9.89932	16.3671	4.03273	5.02467e-07	1.77469e-05
ENSMUSG00000001558	Klhl10	kelch-like 10 (Drosophila)	0	3.61277	25.5059	32.169	15.9123	3.99207	4.49669e-06	0.000130771
ENSMUSG00000052496	Pkdrej	polycystic kidney disease (polycystin) and REJ (sperm receptor for egg jelly homolog, sea urchin)	1.1029	1.13213	15.8332	19.3061	15.666	3.96956	2.63432e-12	2.10358e-10
ENSMUSG00000078937	Cpt1b	carnitine palmitoyltransferase 1b, muscle	19.0765	12.692	263.329	225.439	15.3303	3.93831	4.02351e-15	4.30787e-13
ENSMUSG00000084800	Gm12205	predicted gene 12205	8.12274	6.9483	129.878	98.9911	15.1327	3.9196	1.99347e-08	8.76537e-07
ENSMUSG00000049092	Gpr137c	G protein-coupled receptor 137C	3.34808	5.72799	81.6487	54.4037	14.9397	3.90108	6.04362e-08	2.50082e-06
ENSMUSG00000057897	Camk2b	calcium/calmodulin-dependent protein kinase II, beta	67.2563	98.0174	1228.11	1180.71	14.5242	3.86039	8.48143e-28	2.20112e-25
ENSMUSG00000020389	Cdkl3	cyclin-dependent kinase-like 3	18.2177	31.8167	369.614	332.186	13.9783	3.80512	4.95283e-23	9.95543e-21
ENSMUSG00000026726	Cubn	cubilin (intrinsic factor-cobalamin receptor)	2.33762	11.9978	83.0903	117.839	13.9688	3.80414	6.54077e-08	2.69254e-06
ENSMUSG00000001103	Sebox	SEBOX homeobox	15.2806	15.0822	250.277	171.899	13.8562	3.79246	5.99213e-10	3.32716e-08
ENSMUSG00000051228	Nyx	nyctalopin	0	0.513895	4.35367	2.66231	13.6101	3.7666	0.00263029	0.0336088
ENSMUSG00000008153	Clstn3	calsyntenin 3	64.1562	91.4669	1352.75	764.097	13.5566	3.76092	2.31947e-05	0.000572104
ENSMUSG00000087366	BC042782	cDNA sequence BC042782	14.9578	10.6626	177.224	169.861	13.4986	3.75474	6.04135e-11	3.98462e-09
ENSMUSG00000044566	Cage1	cancer antigen 1	5.43311	3.25329	64.3104	51.7664	13.3152	3.73501	8.14711e-14	7.56889e-12
ENSMUSG00000026644	Acbd7	acyl-Coenzyme A binding domain containing 7	2.93194	2.50802	38.4482	34.1071	13.2903	3.7323	0.00185419	0.0254237
ENSMUSG00000029320	1700016H13Rik	RIKEN cDNA 1700016H13 gene	0	3.34193	26.9643	17.3134	13.2078	3.72332	0.00329001	0.0400777
ENSMUSG00000021226	Acot2	acyl-CoA thioesterase 2	180.783	140.089	2277.99	1918.85	13.0331	3.70411	8.33582e-28	2.1871e-25
ENSMUSG00000091952	Gm17709	predicted gene, 17709	0	2.43132	15.2033	16.5321	13.0106	3.70162	0.00419786	0.0482795
ENSMUSG00000068085	Cyp2d11	cytochrome P450, family 2, subfamily d, polypeptide 11	12.729	7.53825	181.453	76.479	12.6825	3.66476	0.00523826	0.0578398
ENSMUSG00000085054	Gm15834	predicted gene 15834	1.46459	0.626415	10.1084	16.2262	12.5469	3.64926	0.000240225	0.00447944
ENSMUSG00000020183	Cpm	carboxypeptidase M	340.91	455.002	5108.99	4747.63	12.341	3.62539	7.94204e-27	1.97525e-24
ENSMUSG00000037887	Dusp8	dual specificity phosphatase 8	11.5588	20.2459	205.902	182.333	12.1651	3.60467	4.55025e-20	7.05466e-18
ENSMUSG00000025977	Boll	bol, boule-like (Drosophila)	0	3.26211	16.4502	23.2374	12.1264	3.60008	0.00710102	0.0729535
ENSMUSG00000086172	2700068H02Rik	RIKEN cDNA 2700068H02 gene	2.49496	0	13.776	16.5851	12.1214	3.59949	0.000178104	0.00342385
ENSMUSG00000045942	BC049762	cDNA sequence BC049762	3.79028	6.48452	64.0923	59.8394	12.0203	3.5874	1.8394e-06	5.74838e-05
ENSMUSG00000031383	Dusp9	dual specificity phosphatase 9	22.8781	27.8877	291.133	310.814	11.8156	3.56263	1.35588e-21	2.45251e-19
ENSMUSG00000059309	Hist1h3f	histone cluster 1, H3f	0	2.6529	16.5888	14.6028	11.7201	3.55092	0.00774107	0.0773006
ENSMUSG00000075031	Hist1h2bb	histone cluster 1, H2bb	0	5.67914	35.5121	31.2605	11.7201	3.55092	0.00774107	0.0773006
ENSMUSG00000070140	Mir483	microRNA 483	0	36.4865	198.714	224.466	11.5608	3.53117	0.00894723	0.0860693
ENSMUSG00000049723	Mmp12	matrix metallopeptidase 12	27.8776	36.6876	312.294	430.023	11.4563	3.51807	3.72109e-12	2.93217e-10
ENSMUSG00000022863	Btg3	B cell translocation gene 3	1.67765	5.74034	51.5264	32.5267	11.294	3.49748	3.19589e-05	0.000763814
ENSMUSG00000019178	Styxl1	serine/threonine/tyrosine interacting-like 1	5.03838	2.15495	46.076	34.8877	11.2147	3.48732	2.01359e-06	6.2437e-05
ENSMUSG00000054003	Tdrd9	tudor domain containing 9	1.61869	2.21544	22.6793	20.0855	11.1151	3.47445	1.01483e-09	5.4206e-08
ENSMUSG00000035121	Neil2	nei like 2 (E. coli)	5.64079	4.82521	61.7353	54.013	11.0203	3.4621	3.03185e-10	1.77859e-08
ENSMUSG00000052616	Ccdc79	coiled-coil domain containing 79	0.5511	1.41426	8.55818	13.1271	10.9955	3.45884	0.000247719	0.00460634
ENSMUSG00000002791	Pdxk-ps	pyridoxal (pyridoxine, vitamin B6) kinase, pseudogene	1.93519	1.65539	24.3755	15.008	10.9305	3.45029	0.000113859	0.00232642
ENSMUSG00000059854	Hydin	HYDIN, axonemal central pair apparatus protein	0.394566	1.35007	9.49734	9.39851	10.7945	3.43223	1.93551e-11	1.3836e-09
ENSMUSG00000056771	Gm10010	predicted gene 10010	0.671638	5.17076	25.2639	37.9496	10.7834	3.43074	4.45441e-06	0.000129699
ENSMUSG00000058773	Hist1h1b	histone cluster 1, H1b	8.38147	1.79241	57.848	52.2329	10.7796	3.43023	1.52674e-05	0.000397581
ENSMUSG00000042515	Mum1l1	melanoma associated antigen (mutated) 1-like 1	23.8755	32.8768	291.591	320.001	10.7388	3.42476	2.66948e-20	4.16578e-18
ENSMUSG00000087222	E030042O20Rik	RIKEN cDNA E030042O20 gene	10.91	10.2658	128.763	89.4454	10.2687	3.36019	8.32447e-09	3.91457e-07
ENSMUSG00000031576	Kcnu1	potassium channel, subfamily U, member 1	3.23	2.76298	33.0681	28.6281	10.2584	3.35873	1.15105e-05	0.00030604
ENSMUSG00000081984	Dnajb3	DnaJ (Hsp40) homolog, subfamily B, member 3	7.65417	17.0235	138.41	115.329	10.2474	3.35719	1.64573e-10	1.00495e-08
ENSMUSG00000064168	Hist1h2bh	histone cluster 1, H2bh	0	15.2725	103.51	53.4069	10.2428	3.35654	0.00416621	0.0480775
ENSMUSG00000056306	6030405A18Rik	RIKEN cDNA 6030405A18 gene	2.08206	4.89781	45.8048	25.6622	10.2053	3.35125	0.000267302	0.00491187
ENSMUSG00000034532	Fbxo16	F-box protein 16	2.5356	3.25348	30.6258	27.3896	9.98671	3.32001	8.60664e-05	0.00183148
ENSMUSG00000052684	Jun	Jun oncogene	271.376	339.483	2831.06	3281.9	9.97184	3.31786	3.45297e-23	7.16896e-21
ENSMUSG00000060639	Hist1h4i	histone cluster 1, H4i	124.665	119.04	1352.66	1076.02	9.93082	3.31191	7.05432e-19	1.01331e-16
ENSMUSG00000041329	Atp1b2	ATPase, Na+/K+ transporting, beta 2 polypeptide	136.401	131.432	1583.66	1031.78	9.73136	3.28264	2.31992e-07	8.65476e-06
ENSMUSG00000059991	Nptx2	neuronal pentraxin 2	1.22059	0.522053	8.84558	8.11374	9.69643	3.27745	0.00188532	0.0257664
ENSMUSG00000063886	Gm10138	predicted gene 10138	4.25371	14.5547	98.3515	82.4721	9.58203	3.26033	0.000193292	0.00367733
ENSMUSG00000045259	Klhdc9	kelch domain containing 9	4.99633	2.56436	36.2084	35.9804	9.51314	3.24992	2.09965e-06	6.46021e-05
ENSMUSG00000030246	Ldhb	lactate dehydrogenase B	335.793	390.158	4106.63	2795.16	9.47457	3.24406	1.16292e-08	5.28023e-07
ENSMUSG00000074340	Ovgp1	oviductal glycoprotein 1	6.13238	10.4914	101.051	56.9004	9.46976	3.24333	0.000340498	0.0060715
ENSMUSG00000054598	9130230L23Rik	RIKEN cDNA 9130230L23 gene	1.22587	2.09726	16.4986	14.9396	9.42798	3.23695	0.00351799	0.0422088
ENSMUSG00000028240	Cyp7a1	cytochrome P450, family 7, subfamily a, polypeptide 1	421.059	858.379	8293.4	3629.23	9.28816	3.21539	0.00755989	0.0759999
ENSMUSG00000085081	A430071A18Rik	RIKEN cDNA A430071A18 gene	22.5439	5.67188	163.376	97.7021	9.21924	3.20465	5.05294e-05	0.0011479
ENSMUSG00000035112	Wnk4	WNK lysine deficient protein kinase 4	49.0172	60.7793	358.952	631.497	8.98822	3.16804	0.000154019	0.00302166
ENSMUSG00000070883	4930578N16Rik	RIKEN cDNA 4930578N16 gene	3.3409	5.7157	43.4269	38.2476	8.98735	3.1679	3.40136e-06	0.000100758
ENSMUSG00000060716	Plekhh1	pleckstrin homology domain containing, family H (with MyTH4 domain) member 1	5.08302	11.5949	70.6662	75.757	8.74942	3.12919	1.35127e-15	1.5147e-13
ENSMUSG00000087336	Gm15860	predicted gene 15860	10.0659	5.74034	60.2106	78.0641	8.71595	3.12366	0.000311375	0.00558977
ENSMUSG00000032358	Fam83b	family with sequence similarity 83, member B	1.98579	9.76736	36.6628	65.4517	8.65849	3.11412	0.000810602	0.0128512
ENSMUSG00000061356	Gm600	predicted gene 600	2.34467	9.52688	50.5708	51.6285	8.57999	3.10098	1.26325e-09	6.68768e-08
ENSMUSG00000034949	Zfr2	zinc finger RNA binding protein 2	18.9476	31.0654	250.105	176.683	8.50464	3.08825	1.16326e-08	5.28023e-07
ENSMUSG00000058385	Hist1h2bg	histone cluster 1, H2bg	20.1535	17.2396	148.66	167.461	8.42369	3.07445	2.91984e-08	1.25385e-06
ENSMUSG00000024526	Cidea	cell death-inducing DNA fragmentation factor, alpha subunit-like effector A	8.02504	3.43237	53.0802	42.973	8.35308	3.06231	4.18986e-06	0.000122444
ENSMUSG00000089817	Gm7162	predicted gene 7162	6.08148	6.50273	43.5477	61.4813	8.31612	3.05591	1.10365e-05	0.000294751
ENSMUSG00000085039	Gm15927	predicted gene 15927	3.92156	6.70911	47.3658	41.2746	8.30964	3.05479	0.0081536	0.0803116
ENSMUSG00000044177	Wfikkn2	WAP, follistatin/kazal, immunoglobulin, kunitz and netrin domain containing 2	5.50404	6.05345	59.696	35.2809	8.18967	3.03381	0.000142121	0.00281367
ENSMUSG00000036181	Hist1h1c	histone cluster 1, H1c	2869.21	1816.65	21176.8	16633.2	8.04018	3.00723	1.99514e-17	2.53383e-15
ENSMUSG00000048647	Exd1	exonuclease 3'-5' domain containing 1	15.598	17.119	151.937	111.838	8.0344	3.00619	2.44078e-11	1.70398e-09
ENSMUSG00000004951	Hspb1	heat shock protein 1	27.1792	24.7026	240.347	172.202	7.92399	2.98623	3.62677e-09	1.80402e-07
ENSMUSG00000020014	Gm872	predicted gene 872	6.42998	8.25044	66.0138	50.3117	7.89658	2.98123	1.12251e-08	5.12448e-07
ENSMUSG00000085586	Gm11613	predicted gene 11613	11.0584	6.75676	70.5993	69.1338	7.81519	2.96628	1.31521e-09	6.93202e-08
ENSMUSG00000039496	Cdnf	cerebral dopamine neurotrophic factor	14.7221	25.1869	182.898	128.446	7.77498	2.95884	2.30774e-06	7.04673e-05
ENSMUSG00000026525	Opn3	opsin 3	14.649	12.5309	110.093	99.6317	7.68883	2.94276	3.43223e-11	2.32147e-09
ENSMUSG00000085196	Gm14963	predicted gene 14963	1.82587	1.04125	13.6521	8.42868	7.67417	2.94001	0.000788554	0.0125517
ENSMUSG00000052861	Dnahc6	dynein, axonemal, heavy chain 6	0.622096	1.17073	6.86983	6.68545	7.53491	2.91359	4.13642e-07	1.47846e-05
ENSMUSG00000086813	Gm13657	predicted gene 13657	9.63502	13.7365	82.2936	92.0689	7.43434	2.8942	5.98731e-10	3.32716e-08
ENSMUSG00000087523	Gm12319	predicted gene 12319	17.4438	44.765	227.246	231.912	7.35586	2.87889	8.06344e-07	2.72592e-05
ENSMUSG00000074472	Zfp872	zinc finger protein 872	2.86121	1.22376	15.7982	13.4723	7.13934	2.83579	0.000560035	0.00937029
ENSMUSG00000087433	Gm14167	predicted gene 14167	10.7865	9.22696	76.9292	65.7274	7.10284	2.8284	0.000771485	0.0123046
ENSMUSG00000070336	Fbxo47	F-box protein 47	12.3519	9.68551	67.8462	88.9507	7.0892	2.82562	2.99193e-08	1.2802e-06
ENSMUSG00000086266	Igf2as	insulin-like growth factor 2, antisense	1009.31	949.714	7012.29	6875.62	7.06409	2.8205	9.88905e-18	1.29731e-15
ENSMUSG00000007989	Fzd3	frizzled homolog 3 (Drosophila)	22.3028	20.668	138.538	165.415	7.04815	2.81724	6.01088e-13	5.10732e-11
ENSMUSG00000023992	Trem2	triggering receptor expressed on myeloid cells 2	66.8055	27.3309	339.799	325.822	7.04489	2.81658	3.86783e-13	3.37038e-11
ENSMUSG00000079293	Clec7a	C-type lectin domain family 7, member a	122.388	152.067	881.046	1055.21	7.02996	2.81352	9.04781e-17	1.09104e-14
ENSMUSG00000086153	Gm12923	predicted gene 12923	4.66824	3.99328	30.6087	29.7387	6.94253	2.79546	0.00688645	0.0712087
ENSMUSG00000092827	Mir3091	microRNA 3091	61.4549	35.0463	339.324	329.082	6.90133	2.78687	0.00233121	0.0306329
ENSMUSG00000029130	Rnf32	ring finger protein 32	8.43825	0	33.0026	24.93	6.83931	2.77385	0.000477154	0.00813572
ENSMUSG00000023906	Cldn6	claudin 6	57.8911	36.2564	371.019	272.012	6.80578	2.76676	8.24845e-10	4.4861e-08
ENSMUSG00000062417	Hist1h3g	histone cluster 1, H3g	8.8124	7.53825	60.8223	50.4436	6.78099	2.7615	0.00117208	0.0173895
ENSMUSG00000086682	Gm16023	predicted gene 16023	4.30666	8.28895	46.444	38.7673	6.74217	2.75321	1.31215e-05	0.00034656
ENSMUSG00000061068	Mcpt4	mast cell protease 4	4.71775	8.07126	33.1041	53.1392	6.71967	2.74839	0.000347192	0.00616782
ENSMUSG00000068452	Duox2	dual oxidase 2	3.89485	2.96152	17.9212	28.2879	6.71487	2.74736	6.98586e-05	0.00152882
ENSMUSG00000027375	Mal	myelin and lymphocyte protein, T cell differentiation protein	20.9871	17.9526	110.942	149.022	6.6519	2.73377	5.11516e-10	2.89406e-08
ENSMUSG00000069272	Hist1h2ae	histone cluster 1, H2ae	8.84578	7.56681	71.7369	36.751	6.58732	2.71969	0.00597995	0.063762
ENSMUSG00000045102	Poln	DNA polymerase N	1.61221	1.37911	10.0146	9.52624	6.50931	2.7025	0.00177673	0.0245778
ENSMUSG00000033825	Tpsb2	tryptase beta 2	7.20101	4.92787	39.7605	39.0922	6.47786	2.69552	0.0001764	0.00339381
ENSMUSG00000038508	Gdf15	growth differentiation factor 15	99.0002	60.0999	452.22	560.796	6.34386	2.66536	5.74942e-14	5.49093e-12
ENSMUSG00000018800	Abca5	ATP-binding cassette, sub-family A (ABC1), member 5	102.196	145.824	739.263	825.806	6.28817	2.65264	2.06389e-15	2.28136e-13
ENSMUSG00000071103	1700029J07Rik	RIKEN cDNA 1700029J07 gene	11.4475	16.9734	86.6469	92.5836	6.28432	2.65176	3.4969e-09	1.74305e-07
ENSMUSG00000076431	Sox4	SRY-box containing gene 4	42.5336	68.6015	281.909	418.172	6.2771	2.6501	2.87077e-06	8.61086e-05
ENSMUSG00000026611	Spata17	spermatogenesis associated 17	1.41597	4.84496	18.5685	20.3938	6.20209	2.63275	0.00896406	0.0861965
ENSMUSG00000035126	Wdr78	WD repeat domain 78	2.27478	4.28093	21.5094	18.9017	6.14324	2.619	1.16903e-05	0.000310477
ENSMUSG00000018425	Dhx40	DEAH (Asp-Glu-Ala-His) box polypeptide 40	1786.43	1860.86	12780.2	9619.37	6.12008	2.61355	2.08054e-11	1.46337e-09
ENSMUSG00000061313	Ddhd2	DDHD domain containing 2	109.093	123.594	800.544	617.864	6.07464	2.6028	3.93239e-13	3.41417e-11
ENSMUSG00000044816	D630023F18Rik	RIKEN cDNA D630023F18 gene	3.29668	4.23004	25.5975	20.0882	6.04887	2.59667	0.0075165	0.0757576
ENSMUSG00000061666	Gdpd1	glycerophosphodiester phosphodiesterase domain containing 1	53.9835	58.1504	369.829	309.379	6.03598	2.59359	1.66155e-13	1.50841e-11
ENSMUSG00000027547	Sall4	sal-like 4 (Drosophila)	64.4495	46.5168	346.823	322.432	6.0096	2.58727	2.06272e-10	1.24054e-08
ENSMUSG00000090925	1810064F22Rik	RIKEN cDNA 1810064F22 gene	6.45463	1.10428	26.284	19.308	6.00918	2.58717	0.00197985	0.0268584
ENSMUSG00000021268	Meg3	maternally expressed 3	1390.82	2564.93	9727.37	13986	5.97362	2.57861	9.57805e-07	3.17178e-05
ENSMUSG00000089672	Gp49a	glycoprotein 49 A	39.4284	69.3825	283.793	360.071	5.89662	2.55989	2.08387e-11	1.46337e-09
ENSMUSG00000022211	Lrrc16b	leucine rich repeat containing 16B	1.01978	2.61699	10.323	11.1098	5.87329	2.55417	0.000190171	0.00362373
ENSMUSG00000059970	Hspa2	heat shock protein 2	60.5445	42.278	331.952	271.389	5.84693	2.54768	2.7749e-13	2.45384e-11
ENSMUSG00000093577	Gm20632	predicted gene 20632	21.8101	14.2669	116.44	95.2325	5.84633	2.54753	2.8653e-10	1.69337e-08
ENSMUSG00000078851	Hist3h2a	histone cluster 3, H2a	61.8049	41.492	327.758	270.861	5.77448	2.52969	1.30345e-12	1.06945e-10
ENSMUSG00000052221	Ppp1r36	protein phosphatase 1, regulatory subunit 36	6.50951	1.85611	23.2128	25.2416	5.77045	2.52868	0.000885607	0.0137911
ENSMUSG00000085282	Gm15663	predicted gene 15663	17.2888	25.1415	163.178	80.927	5.73384	2.5195	0.0083108	0.0813232
ENSMUSG00000071064	Zfp827	zinc finger protein 827	25.9893	19.6664	114.869	147.844	5.73333	2.51937	2.9938e-11	2.03647e-09
ENSMUSG00000085169	Gm10785	predicted gene 10785	4.91743	10.9367	47.176	43.5842	5.70525	2.51229	1.78275e-05	0.000453302
ENSMUSG00000041268	Dmxl2	Dmx-like 2	67.8403	165.192	702.872	625.625	5.68167	2.50631	7.10666e-14	6.62807e-12
ENSMUSG00000035773	Kiss1r	KISS1 receptor	5.90651	6.31564	35.6704	33.8098	5.66479	2.50202	6.46591e-07	2.24716e-05
ENSMUSG00000036196	Slc26a8	solute carrier family 26, member 8	3.15633	5.39993	25.7785	22.7298	5.64992	2.49823	1.72157e-05	0.000440087
ENSMUSG00000062017	Abca14	ATP-binding cassette, sub-family A (ABC1), member 14	6.05109	8.134	48.3269	32.0835	5.64933	2.49808	3.29131e-05	0.000784265
ENSMUSG00000049507	4930429B21Rik	RIKEN cDNA 4930429B21 gene	3.74695	2.4039	17.133	17.6428	5.63339	2.494	0.00271499	0.0343342
ENSMUSG00000044349	Snhg11	small nucleolar RNA host gene 11	44.5151	63.1307	309.26	298.506	5.62637	2.4922	6.08568e-11	4.0028e-09
ENSMUSG00000054932	Afp	alpha fetoprotein	112535	242022	1.0097e+06	965097	5.55079	2.47269	2.64433e-14	2.58754e-12
ENSMUSG00000038555	Reep2	receptor accessory protein 2	13.7417	10.3719	73.9226	60.0024	5.53423	2.46838	1.76878e-07	6.69277e-06
ENSMUSG00000032850	Rnft2	ring finger protein, transmembrane 2	19.4851	21.6682	114.311	113.335	5.51221	2.46263	3.73277e-06	0.000110165
ENSMUSG00000090582	Gm17024	predicted gene 17024	4.91122	10.5028	33.0493	51.691	5.47835	2.45374	0.00594746	0.0635069
ENSMUSG00000048603	Gm9828	predicted gene 9828	15.5599	11.8313	97.847	52.6744	5.4762	2.45318	0.00412404	0.0477756
ENSMUSG00000018102	Hist1h2bc	histone cluster 1, H2bc	2610.28	1869.17	14287.9	10309.2	5.47173	2.452	2.70499e-08	1.16789e-06
ENSMUSG00000030321	BC060267	cDNA sequence BC060267	3.08533	1.58354	13.6286	11.9639	5.46167	2.44934	0.00164493	0.0230043
ENSMUSG00000040265	Dnm3	dynamin 3	20.1753	18.217	111.785	96.2387	5.39928	2.43277	1.1873e-07	4.66251e-06
ENSMUSG00000048232	Fbxo10	F-box protein 10	57.3402	54.8201	293.658	310.696	5.36915	2.42469	1.95875e-12	1.57997e-10
ENSMUSG00000023387	Kcnk16	potassium channel, subfamily K, member 16	38.9657	62.1184	265.27	277.663	5.35246	2.4202	6.27473e-09	3.00232e-07
ENSMUSG00000038347	Tcte2	t-complex-associated testis expressed 2	16.2475	11.9129	78.8975	72.0025	5.33947	2.4167	1.82246e-06	5.71787e-05
ENSMUSG00000006720	Zfp184	zinc finger protein 184 (Kruppel-like)	6.33255	1.62509	20.7606	21.7491	5.32202	2.41197	0.000128773	0.00258152
ENSMUSG00000003378	Grik5	glutamate receptor, ionotropic, kainate 5 (gamma 2)	80.765	50.6874	397.345	304.186	5.31777	2.41082	1.15898e-10	7.26294e-09
ENSMUSG00000026764	Kif5c	kinesin family member 5C	15.4527	24.2338	74.657	136.96	5.31315	2.40957	0.00648391	0.0679288
ENSMUSG00000085704	4921531C22Rik	RIKEN cDNA 4921531C22 gene	50.9427	53.1428	277.422	275.315	5.29167	2.40372	4.45017e-10	2.55414e-08
ENSMUSG00000073627	C130036L24Rik	RIKEN cDNA C130036L24 gene	7.82877	7.30564	42.2443	36.6653	5.19556	2.37728	7.93464e-06	0.000218762
ENSMUSG00000075707	Dio3	deiodinase, iodothyronine type III	16.1101	9.95278	79.3773	55.5282	5.15781	2.36676	3.51376e-06	0.000103958
ENSMUSG00000026628	Atf3	activating transcription factor 3	78.4343	115.018	444.676	556.558	5.15741	2.36665	6.44448e-11	4.20971e-09
ENSMUSG00000093606	B130034C11Rik	RIKEN cDNA B130034C11 gene	11.4507	12.809	72.6484	52.6968	5.14895	2.36428	1.45007e-06	4.61625e-05
ENSMUSG00000042851	Zc3h6	zinc finger CCCH type containing 6	19.4607	22.4734	120.884	94.3275	5.11436	2.35455	7.49966e-10	4.08817e-08
ENSMUSG00000004267	Eno2	enolase 2, gamma neuronal	12.8312	9.14669	50.184	60.417	5.01411	2.32599	0.00104304	0.0157588
ENSMUSG00000028698	Pik3r3	phosphatidylinositol 3 kinase, regulatory subunit, polypeptide 3 (p55)	62.9549	119.349	427.169	483.051	4.97561	2.31487	5.76395e-11	3.81219e-09
ENSMUSG00000087484	2900089D17Rik	RIKEN cDNA 2900089D17 gene	2.14961	4.59702	18.1746	15.4801	4.97149	2.31368	0.00967691	0.0912955
ENSMUSG00000019970	Sgk1	serum/glucocorticoid regulated kinase 1	3859.93	3853.03	19755.4	18655.5	4.96249	2.31106	4.6494e-13	3.97882e-11
ENSMUSG00000034460	Six4	sine oculis-related homeobox 4 homolog (Drosophila)	0.360718	3.39419	9.08717	9.59136	4.95811	2.30979	0.00165358	0.0231017
ENSMUSG00000001986	Gria3	glutamate receptor, ionotropic, AMPA3 (alpha 3)	55.9529	73.8039	316.757	321.545	4.90203	2.29338	1.78246e-11	1.28574e-09
ENSMUSG00000028125	Abca4	ATP-binding cassette, sub-family A (ABC1), member 4	15.2362	13.0332	65.963	72.1243	4.86721	2.2831	3.27486e-05	0.000781125
ENSMUSG00000039539	Sgcz	sarcoglycan zeta	9.77348	5.40965	36.9022	35.9874	4.78328	2.258	6.32115e-06	0.000177557
ENSMUSG00000044854	1700056E22Rik	RIKEN cDNA 1700056E22 gene	33.8097	28.9213	148.345	151.615	4.76463	2.25236	6.83883e-07	2.36301e-05
ENSMUSG00000032495	Lrrc2	leucine rich repeat containing 2	4.68292	2.185	14.5445	18.1588	4.74412	2.24614	0.000164756	0.00320336
ENSMUSG00000027071	P2rx3	purinergic receptor P2X, ligand-gated ion channel, 3	27.2302	23.2931	119.301	120.674	4.73285	2.24271	4.26525e-07	1.51543e-05
ENSMUSG00000073652	Apol7d	apolipoprotein L 7d	12.3954	12.7238	47.9089	70.0375	4.67854	2.22606	0.00259308	0.0332631
ENSMUSG00000044556	4930544O15Rik	RIKEN cDNA 4930544O15 gene	7.76488	6.64219	37.5147	30.1095	4.6773	2.22568	0.00683602	0.0707792
ENSMUSG00000035109	Shc4	SHC (Src homology 2 domain containing) family, member 4	4.83371	6.89137	28.6355	26.107	4.65268	2.21806	8.14484e-06	0.000223781
ENSMUSG00000085355	3010003L21Rik	RIKEN cDNA 3010003L21 gene	6.27043	6.13007	26.8941	30.7654	4.63319	2.212	0.000586342	0.00976255
ENSMUSG00000058216	BC021614	cDNA sequence BC021614	6359.25	3890.29	27587.9	19575.1	4.58514	2.19697	1.49901e-06	4.75304e-05
ENSMUSG00000091994	E130317F20Rik	RIKEN cDNA E130317F20 gene	18.5965	12.2367	67.3019	73.1673	4.53929	2.18247	6.95294e-08	2.84354e-06
ENSMUSG00000033540	Idua	iduronidase, alpha-L-	121.503	116.388	627.983	455.637	4.53926	2.18246	1.40726e-07	5.4193e-06
ENSMUSG00000085105	Gm12758	predicted gene 12758	1.8645	2.87086	12.8686	8.67587	4.53428	2.18087	0.000970952	0.0148619
ENSMUSG00000039410	Prdm16	PR domain containing 16	7.20596	8.85099	34.8781	38.1775	4.53377	2.18071	2.25847e-08	9.81383e-07
ENSMUSG00000020793	Galr2	galanin receptor 2	6.10191	7.45665	34.5942	27.0413	4.53016	2.17956	0.00036376	0.00642392
ENSMUSG00000064061	Dzip3	DAZ interacting protein 3, zinc finger	48.4425	95.6609	279.569	374.544	4.52338	2.1774	6.78575e-07	2.34807e-05
ENSMUSG00000049303	Syt12	synaptotagmin XII	44.7234	58.9365	210.651	256.45	4.49019	2.16678	3.64809e-08	1.5524e-06
ENSMUSG00000019817	Plagl1	pleiomorphic adenoma gene-like 1	1846.06	2230.95	6883.43	11452.3	4.48113	2.16386	0.00125773	0.018423
ENSMUSG00000016763	Scube1	signal peptide, CUB domain, EGF-like 1	25.0376	28.9008	114.407	128.002	4.47828	2.16294	1.19197e-09	6.33844e-08
ENSMUSG00000019194	Scn1b	sodium channel, voltage-gated, type I, beta	283.813	180.324	1041.52	1042.43	4.47374	2.16148	4.26586e-11	2.86101e-09
ENSMUSG00000021125	Arg2	arginase type II	6.54142	10.2586	46.2769	28.989	4.46498	2.15865	0.0010445	0.0157639
ENSMUSG00000029201	Ugdh	UDP-glucose dehydrogenase	359.963	463.861	2182.68	1491.66	4.44484	2.15213	1.38725e-05	0.000364283
ENSMUSG00000055833	1700034H15Rik	RIKEN cDNA 1700034H15 gene	19.2469	5.48801	62.73	47.3859	4.43552	2.1491	0.00131173	0.0191085
ENSMUSG00000023905	Tnfrsf12a	tumor necrosis factor receptor superfamily, member 12a	803.65	677.215	3490.89	3073.65	4.41722	2.14314	2.79538e-11	1.91789e-09
ENSMUSG00000057230	Aak1	AP2 associated kinase 1	5.28226	40.3654	80.3283	121.921	4.41576	2.14266	0.0045263	0.0512909
ENSMUSG00000084925	1810062O18Rik	RIKEN cDNA 1810062O18 gene	9.62509	10.2918	44.0108	43.9876	4.4027	2.13839	0.00812817	0.0801273
ENSMUSG00000037355	4933407H18Rik	RIKEN cDNA 4933407H18 gene	33.2425	65.4031	210.317	222.665	4.37416	2.12901	5.07801e-10	2.87987e-08
ENSMUSG00000010342	Tex14	testis expressed gene 14	5.18089	17.7272	54.5309	44.4844	4.30795	2.107	0.00853455	0.0830024
ENSMUSG00000047904	Sstr2	somatostatin receptor 2	93.1886	81.4478	410.725	341.154	4.29023	2.10105	2.16798e-09	1.11317e-07
ENSMUSG00000085776	5430402O13Rik	RIKEN cDNA 5430402O13 gene	8.60618	16.1961	62.3689	43.8601	4.26862	2.09377	0.00109967	0.0164923
ENSMUSG00000041180	Hectd2	HECT domain containing 2	16.8765	44.5122	121.333	141.4	4.2652	2.09261	1.7028e-07	6.4636e-06
ENSMUSG00000003411	Rab3b	RAB3B, member RAS oncogene family	94.9749	66.2442	318.677	370.708	4.26058	2.09105	2.03023e-08	8.91063e-07
ENSMUSG00000002289	Angptl4	angiopoietin-like 4	2196.49	1325.19	8800.18	6225.46	4.25146	2.08796	4.75404e-06	0.000137086
ENSMUSG00000024521	Pmaip1	phorbol-12-myristate-13-acetate-induced protein 1	34.7145	52.3442	167.311	202.405	4.23185	2.08129	1.47497e-08	6.63211e-07
ENSMUSG00000031633	Slc25a4	solute carrier family 25 (mitochondrial carrier, adenine nucleotide translocator), member 4	3841.55	3744.74	18713.2	13350.3	4.21182	2.07445	1.1299e-06	3.67042e-05
ENSMUSG00000046463	5930403N24Rik	RIKEN cDNA 5930403N24 gene	10.2714	16.9451	48.612	66.2464	4.20534	2.07222	1.6769e-05	0.00043005
ENSMUSG00000078451	Ppil6	peptidylprolyl isomerase (cyclophilin)-like 6	14.6047	2.49861	36.288	35.5972	4.18717	2.06598	0.00224849	0.029825
ENSMUSG00000069713	4933406P04Rik	RIKEN cDNA 4933406P04 gene	4.3512	7.44415	27.629	21.6931	4.16726	2.0591	0.00189157	0.0258222
ENSMUSG00000020190	Mknk2	MAP kinase-interacting serine/threonine kinase 2	929.543	828.167	3758.74	3518.63	4.12559	2.0446	1.05284e-10	6.61513e-09
ENSMUSG00000057132	Rpgrip1	retinitis pigmentosa GTPase regulator interacting protein 1	2.23549	3.55136	11.131	12.7373	4.1102	2.03921	0.000734736	0.0118611
ENSMUSG00000025140	Pycr1	pyrroline-5-carboxylate reductase 1	96.9669	71.8873	317.525	377.198	4.09944	2.03543	2.76537e-07	1.01892e-05
ENSMUSG00000017765	Slc12a4	solute carrier family 12, member 4	794.76	784.154	3481.32	2976.87	4.07592	2.02713	3.9588e-10	2.29418e-08
ENSMUSG00000091784	Gm17022	predicted gene 17022	5.12124	13.1423	40.6482	34.043	4.0759	2.02712	0.00650209	0.0680895
ENSMUSG00000028211	Trp53inp1	transformation related protein 53 inducible nuclear protein 1	403.402	827.504	3084.07	1897.38	4.0335	2.01203	0.00209809	0.0280796
ENSMUSG00000074635	3110070M22Rik	RIKEN cDNA 3110070M22 gene	18.0224	5.92947	56.9318	39.1661	3.99756	1.99912	0.000679915	0.0110961
ENSMUSG00000030309	Caprin2	caprin family member 2	147.743	216.071	580.574	878.263	3.9956	1.99841	0.000289083	0.00525173
ENSMUSG00000031530	Dusp4	dual specificity phosphatase 4	14.7731	18.4696	63.7265	69.2456	3.98597	1.99493	2.82283e-06	8.47771e-05
ENSMUSG00000092341	Malat1	metastasis associated lung adenocarcinoma transcript 1 (non-coding RNA)	11106.9	11825.4	38475	53127.1	3.98012	1.99281	1.22031e-06	3.93732e-05
ENSMUSG00000021365	Nedd9	neural precursor cell expressed, developmentally down-regulated gene 9	107.538	154.506	518.108	523.411	3.96077	1.98578	1.61532e-09	8.3742e-08
ENSMUSG00000008734	Gprc5b	G protein-coupled receptor, family C, group 5, member B	27.8686	53.5646	160.289	162.764	3.95346	1.98312	1.79029e-08	7.95994e-07
ENSMUSG00000018570	2810408A11Rik	RIKEN cDNA 2810408A11 gene	18.871	15.2457	64.3993	70.8522	3.95014	1.98191	5.33296e-05	0.00120236
ENSMUSG00000022225	Cma1	chymase 1, mast cell	10.1471	4.95999	24.512	35.332	3.94658	1.9806	0.00824262	0.0808844
ENSMUSG00000041912	Tdrkh	tudor and KH domain containing protein	88.8074	74.2695	330.782	314.133	3.9406	1.97842	3.46459e-09	1.73056e-07
ENSMUSG00000037172	E330009J07Rik	RIKEN cDNA E330009J07 gene	169.461	234.448	745.777	845.057	3.92478	1.97261	1.6169e-09	8.3742e-08
ENSMUSG00000054181	A930012O16Rik	RIKEN cDNA A930012O16 gene	11.2704	10.5173	44.1974	41.4326	3.91629	1.96949	0.000460965	0.00788961
ENSMUSG00000004113	Cacna1b	calcium channel, voltage-dependent, N type, alpha 1B subunit	14.9151	25.8529	96.9824	62.4014	3.89639	1.96214	0.000837592	0.0131828
ENSMUSG00000078247	Airn	antisense Igf2r RNA	52.5425	85.9829	211.279	330.29	3.89568	1.96187	0.0013552	0.019622
ENSMUSG00000074210	E130208F15Rik	RIKEN cDNA E130208F15 gene	5.39016	4.61082	20.1513	18.9106	3.89194	1.96049	0.00685244	0.0708877
ENSMUSG00000048424	Ranbp3l	RAN binding protein 3-like	10.3728	2.41991	28.9621	20.8946	3.88294	1.95715	0.00222069	0.0295054
ENSMUSG00000040187	Arntl2	aryl hydrocarbon receptor nuclear translocator-like 2	24.9171	26.051	94.5864	102.243	3.84814	1.94416	6.45731e-06	0.000180956
ENSMUSG00000090576	Gm17055	predicted gene 17055	10.4628	16.11	47.1791	55.2538	3.84133	1.94161	5.4176e-05	0.00121914
ENSMUSG00000048612	Myof	myoferlin	36.65	47.1203	152.833	169.834	3.83827	1.94046	9.89301e-09	4.56213e-07
ENSMUSG00000025359	Pmel	premelanosome protein	24.1203	26.8853	106.948	89.4814	3.83772	1.94025	1.79167e-06	5.62868e-05
ENSMUSG00000061882	Ccdc62	coiled-coil domain containing 62	105.259	94.2282	408.016	353.919	3.80599	1.92827	9.08892e-07	3.03082e-05
ENSMUSG00000041801	Phlda3	pleckstrin homology-like domain, family A, member 3	161.59	101.012	426.272	576.67	3.80523	1.92798	2.60377e-06	7.86931e-05
ENSMUSG00000048240	Gng7	guanine nucleotide binding protein (G protein), gamma 7	10.1574	6.71408	37.2834	27.1106	3.80321	1.92722	3.486e-05	0.000820826
ENSMUSG00000093553	Gm20633	predicted gene 20633	4.94939	7.0563	19.5472	26.1986	3.79688	1.92481	0.000863372	0.0135084
ENSMUSG00000074657	Kif5a	kinesin family member 5A	3.70093	1.68844	9.8768	10.524	3.77148	1.91513	0.000542707	0.00910589
ENSMUSG00000090863	A530084C06Rik	RIKEN cDNA A530084C06 gene	4.37866	2.91322	14.6069	12.9363	3.76372	1.91216	0.00277354	0.0349267
ENSMUSG00000041720	Pi4ka	phosphatidylinositol 4-kinase, catalytic, alpha polypeptide	876.453	1319.07	3898.43	4350.44	3.74401	1.90458	5.51261e-09	2.66435e-07
ENSMUSG00000002265	Peg3	paternally expressed 3	2120.39	3876.91	13772.4	8756.76	3.74395	1.90456	0.00141468	0.020294
ENSMUSG00000083250	Gm5403	predicted gene 5403	5.01314	4.76479	19.4145	17.2793	3.7395	1.90285	0.00174585	0.0242348
ENSMUSG00000085287	4833418N02Rik	RIKEN cDNA 4833418N02 gene	53.2538	62.2882	243.034	185.428	3.69546	1.88576	5.84644e-07	2.04377e-05
ENSMUSG00000010154	Spire2	spire homolog 2 (Drosophila)	32.7408	33.7226	118.751	127.698	3.69489	1.88553	9.95656e-07	3.28801e-05
ENSMUSG00000084897	Gm14226	predicted gene 14226	40.3256	12.3197	99.5669	94.9383	3.68095	1.88008	2.57235e-07	9.55171e-06
ENSMUSG00000022415	Syngr1	synaptogyrin 1	87.0501	80.1919	306.568	309.112	3.6683	1.87511	3.29834e-06	9.81934e-05
ENSMUSG00000035314	Gdpd5	glycerophosphodiester phosphodiesterase domain containing 5	43.0287	42.0125	163.489	149.275	3.66483	1.87375	8.90916e-08	3.59924e-06
ENSMUSG00000027713	1810062G17Rik	RIKEN cDNA 1810062G17 gene	79.8389	71.7101	311.337	243.247	3.64661	1.86656	6.82973e-05	0.0014974
ENSMUSG00000071076	Jund	Jun proto-oncogene related gene d	753.004	448.393	2294.1	2101.82	3.64583	1.86625	2.26461e-09	1.15781e-07
ENSMUSG00000066687	Zbtb16	zinc finger and BTB domain containing 16	19.537	41.2584	136.739	85.5659	3.64443	1.86569	0.00333437	0.0405265
ENSMUSG00000034587	8430429K09Rik	RIKEN cDNA 8430429K09 gene	49.3262	71.2029	225.544	215.179	3.64389	1.86548	8.89566e-05	0.00188459
ENSMUSG00000042523	Dnalc1	dynein, axonemal, light chain 1	76.13	104.196	319.862	337.378	3.63199	1.86076	2.0955e-06	6.45575e-05
ENSMUSG00000032816	Igdcc4	immunoglobulin superfamily, DCC subclass, member 4	98.5701	173.345	537.005	453.454	3.6301	1.86001	1.15713e-08	5.27246e-07
ENSMUSG00000042408	Zmym6	zinc finger, MYM-type 6	42.7649	90.2965	218.38	261.785	3.59614	1.84645	2.14184e-07	8.01545e-06
ENSMUSG00000078444	Gm10941	predicted gene 10941	17.5916	13.1671	58.4312	52.3788	3.58972	1.84387	0.00570314	0.0616145
ENSMUSG00000022092	Ppp3cc	protein phosphatase 3, catalytic subunit, gamma isoform	131.07	123.741	518.509	396.236	3.57735	1.83889	3.73573e-08	1.58427e-06
ENSMUSG00000063506	Arhgap22	Rho GTPase activating protein 22	27.746	21.0972	106.389	68.3107	3.56424	1.83359	0.00334538	0.0406072
ENSMUSG00000089901	Gm8113	predicted gene 8113	228.866	182.071	722.473	744.2	3.55632	1.83039	1.52219e-08	6.81875e-07
ENSMUSG00000030672	Mylpf	myosin light chain, phosphorylatable, fast skeletal muscle	50.6753	62.6143	250.658	152.834	3.54947	1.8276	0.00393263	0.0459596
ENSMUSG00000049939	Lrrc4	leucine rich repeat containing 4	7.60623	7.68948	26.9646	27.1961	3.52839	1.81901	0.00140455	0.0201896
ENSMUSG00000087528	9830144P21Rik	RIKEN cDNA 9830144P21 gene	4.58574	8.82608	28.2874	19.052	3.51784	1.81469	0.00129779	0.018917
ENSMUSG00000084799	Gm11602	predicted gene 11602	11.8542	5.91517	31.3631	31.1917	3.50753	1.81045	0.00266002	0.0338183
ENSMUSG00000039556	Ppp1r3f	protein phosphatase 1, regulatory (inhibitor) subunit 3F	7.41866	14.9585	40.0479	38.4538	3.49613	1.80576	0.000138748	0.00275145
ENSMUSG00000031400	G6pdx	glucose-6-phosphate dehydrogenase X-linked	716.325	836.897	2939.39	2506.21	3.4938	1.8048	2.29762e-08	9.95607e-07
ENSMUSG00000021536	Adcy2	adenylate cyclase 2	13.6794	12.0178	46.4412	43.4181	3.48447	1.80094	1.08074e-05	0.000289605
ENSMUSG00000093760	Gm20678	predicted gene 20678	29.6262	16.4727	83.8356	77.1339	3.4792	1.79876	0.000299515	0.00540531
ENSMUSG00000022074	Tnfrsf10b	tumor necrosis factor receptor superfamily, member 10b	24.0574	23.0989	80.31	84.3113	3.47857	1.79849	3.60304e-06	0.000106468
ENSMUSG00000039563	2210406O10Rik	RIKEN cDNA 2210406O10 gene	16.0426	12.4755	51.839	47.6655	3.47675	1.79774	0.0023094	0.0304805
ENSMUSG00000070287	Tmem22	transmembrane protein 22	40.3995	44.6729	144.857	151.743	3.47414	1.79666	6.17009e-06	0.000173723
ENSMUSG00000001036	Epn2	epsin 2	658.014	725.086	2546.28	2253.22	3.45797	1.78992	3.58974e-08	1.53051e-06
ENSMUSG00000060600	Eno3	enolase 3, beta muscle	254.027	200.086	777.687	794.153	3.44895	1.78616	4.23099e-07	1.50775e-05
ENSMUSG00000045136	Tubb2b	tubulin, beta 2B class IIB	20.2505	11.7793	41.0914	69.1015	3.42751	1.77716	0.00886869	0.0856243
ENSMUSG00000033396	Spg11	spastic paraplegia 11	190.113	354.441	868.874	996.09	3.41289	1.771	9.93856e-08	3.96811e-06
ENSMUSG00000002076	Hsf2bp	heat shock transcription factor 2 binding protein	17.0667	9.7327	41.8817	49.3713	3.39259	1.76239	0.00933604	0.0889318
ENSMUSG00000052373	Mpp3	membrane protein, palmitoylated 3 (MAGUK p55 subfamily member 3)	18.6779	10.3383	45.3091	53.2548	3.38442	1.75891	5.37439e-05	0.00121056
ENSMUSG00000090555	Gm8893	predicted gene 8893	1225.93	795.624	2897.85	3940.62	3.37037	1.75291	1.22756e-05	0.00032554
ENSMUSG00000032489	Kif9	kinesin family member 9	8.47991	8.61392	32.0072	25.5424	3.35494	1.74629	0.000485628	0.00827022
ENSMUSG00000041688	Amot	angiomotin	196.296	341.913	825.285	983.966	3.34991	1.74412	1.11558e-07	4.39531e-06
ENSMUSG00000046753	Ccdc66	coiled-coil domain containing 66	37.068	62.9641	153.687	180.698	3.33113	1.73601	1.82876e-06	5.73006e-05
ENSMUSG00000030256	Bhlhe41	basic helix-loop-helix family, member e41	6.33881	4.26039	19.3749	16.0521	3.33051	1.73574	0.00164564	0.0230043
ENSMUSG00000025571	Tnrc6c	trinucleotide repeat containing 6C	72.8889	129.39	320.55	355.294	3.32958	1.73534	1.52826e-07	5.84981e-06
ENSMUSG00000085615	A330035P11Rik	RIKEN cDNA A330035P11 gene	40.3013	52.4609	156.815	153.039	3.32865	1.73494	1.93823e-06	6.03352e-05
ENSMUSG00000074136	4930513N10Rik	RIKEN cDNA 4930513N10 gene	6.10968	17.1043	38.1432	39.0752	3.31512	1.72906	0.00037159	0.006538
ENSMUSG00000041343	Ankrd42	ankyrin repeat domain 42	8.35523	11.4355	26.1423	39.4956	3.30478	1.72455	0.0016356	0.0229137
ENSMUSG00000021223	Papln	papilin, proteoglycan-like sulfated glycoprotein	15.3493	26.8853	63.8158	76.1199	3.30177	1.72324	9.24282e-06	0.000250206
ENSMUSG00000022176	Rem2	rad and gem related GTP binding protein 2	24.9097	7.61005	61.4016	46.3244	3.30051	1.72269	0.00348228	0.0418446
ENSMUSG00000037111	Setd7	SET domain containing (lysine methyltransferase) 7	125.005	197.721	482.662	579.231	3.27888	1.7132	2.52405e-07	9.40161e-06
ENSMUSG00000046056	Sbsn	suprabasin	16.3521	10.4909	51.4927	36.6105	3.27054	1.70953	0.000225816	0.00423533
ENSMUSG00000020962	Gtf2a1	general transcription factor II A, 1	432.346	408.053	1379.33	1377.21	3.26841	1.70859	9.4887e-08	3.81401e-06
ENSMUSG00000032826	Ank2	ankyrin 2, brain	66.1058	116.788	290.793	307.154	3.25806	1.70401	3.29404e-07	1.19891e-05
ENSMUSG00000073436	Eme2	essential meiotic endonuclease 1 homolog 2 (S. pombe)	253.241	237.96	840.819	759.867	3.24722	1.69921	6.90609e-07	2.37936e-05
ENSMUSG00000024274	Zscan30	zinc finger and SCAN domain containing 30	39.3263	43.5344	137.31	131.99	3.23862	1.69538	0.000595403	0.00988585
ENSMUSG00000050071	Bex1	brain expressed gene 1	509.786	615.214	2152.7	1499.87	3.23557	1.69402	0.000102712	0.00212878
ENSMUSG00000045045	Lrfn4	leucine rich repeat and fibronectin type III domain containing 4	23.4344	30.5049	80.1676	94.5391	3.22753	1.69043	1.51406e-05	0.00039508
ENSMUSG00000027801	Tm4sf4	transmembrane 4 superfamily member 4	8115.23	5679.56	24846.3	19771.2	3.22289	1.68835	4.08601e-08	1.71756e-06
ENSMUSG00000039801	2410089E03Rik	RIKEN cDNA 2410089E03 gene	184.178	329.91	736.089	926.08	3.22196	1.68794	2.89735e-06	8.67968e-05
ENSMUSG00000041734	Kirrel	kin of IRRE like (Drosophila)	28.6155	41.5944	110.779	116.205	3.22167	1.68781	9.19262e-07	3.06113e-05
ENSMUSG00000000167	Pih1d2	PIH1 domain containing 2	22.0518	11.3181	57.3284	50.4912	3.21936	1.68677	0.00250954	0.032564
ENSMUSG00000039062	Anpep	alanyl (membrane) aminopeptidase	2272.5	1917.47	7041.11	6491.61	3.21833	1.68631	6.46746e-08	2.66696e-06
ENSMUSG00000038569	Rad9b	RAD9 homolog B (S. cerevisiae)	61.0012	79.4064	236.597	216.708	3.21727	1.68584	1.24948e-05	0.000330739
ENSMUSG00000033318	Gstt2	glutathione S-transferase, theta 2	817.066	714.483	2843.58	2091.85	3.21123	1.68312	3.92506e-06	0.00011527
ENSMUSG00000021306	Gpr137b	G protein-coupled receptor 137B	88.8737	87.651	283.786	283.516	3.20236	1.67913	6.49953e-07	2.25556e-05
ENSMUSG00000021904	Sema3g	sema domain, immunoglobulin domain (Ig), short basic domain, secreted, (semaphorin) 3G	8.57678	7.92364	25.5727	27.3664	3.19692	1.67668	0.000228023	0.00427002
ENSMUSG00000038372	Gmds	GDP-mannose 4, 6-dehydratase	142.99	177.187	514.205	512.272	3.19474	1.6757	1.63521e-06	5.15068e-05
ENSMUSG00000044927	H1fx	H1 histone family, member X	129.127	77.8219	264.328	399.104	3.19393	1.67533	0.0015864	0.0223726
ENSMUSG00000045411	2410002F23Rik	RIKEN cDNA 2410002F23 gene	254.501	276.162	745.989	952.494	3.18925	1.67322	4.258e-07	1.51511e-05
ENSMUSG00000078532	Nkain1	Na+/K+ transporting ATPase interacting 1	10.981	7.82773	24	36.1596	3.18676	1.67209	0.00174176	0.0241921
ENSMUSG00000040428	Plekha4	pleckstrin homology domain containing, family A (phosphoinositide binding specific) member 4	22.3633	14.6662	66.1129	52.0303	3.17916	1.66864	0.000143897	0.00283905
ENSMUSG00000056666	Retsat	retinol saturase (all trans retinol 13,14 reductase)	3694.79	3012.23	13408.4	7964.69	3.17561	1.66703	0.00581709	0.062619
ENSMUSG00000070806	Zmynd12	zinc finger, MYND domain containing 12	46.1976	27.6626	116.381	117.719	3.15802	1.65902	0.00100366	0.0152828
ENSMUSG00000043833	2900005J15Rik	RIKEN cDNA 2900005J15 gene	64.0916	70.0925	183.661	239.088	3.13925	1.65042	6.84797e-06	0.00019034
ENSMUSG00000062624	Cyp2c67	cytochrome P450, family 2, subfamily c, polypeptide 67	146.517	133.022	552.463	327.641	3.13754	1.64963	0.00640206	0.0672188
ENSMUSG00000021456	Fbp2	fructose bisphosphatase 2	32.8996	20.102	86.3677	80.0589	3.12872	1.64557	0.000289296	0.00525173
ENSMUSG00000047592	BC055004	cDNA sequence BC055004	9.16184	9.51656	29.3587	29.0012	3.11344	1.63851	0.00216247	0.0288281
ENSMUSG00000090622	A930033H14Rik	RIKEN cDNA A930033H14 gene	6.81682	11.6624	25.877	31.6619	3.10284	1.63359	0.00151279	0.0214989
ENSMUSG00000030144	Clec4d	C-type lectin domain family 4, member d	29.1328	20.9333	71.1794	84.5639	3.09948	1.63202	0.000513785	0.00866936
ENSMUSG00000026017	Carf	calcium response factor	81.6712	187.756	404.269	425.556	3.06944	1.61797	4.88974e-05	0.00111507
ENSMUSG00000000982	Ccl3	chemokine (C-C motif) ligand 3	22.357	13.9087	61.0208	50.6645	3.06863	1.61759	0.00897117	0.0862301
ENSMUSG00000036944	Tmem71	transmembrane protein 71	31.8702	47.7088	113.648	130.938	3.06275	1.61483	1.60233e-05	0.000414467
ENSMUSG00000064307	Lrrc51	leucine rich repeat containing 51	126.974	74.572	321.116	298.147	3.06147	1.61423	1.7739e-05	0.000451532
ENSMUSG00000070604	Vsig10l	ZV-set and immunoglobulin domain containing 10 like	11.6869	16.4238	45.5162	40.6934	3.05618	1.61173	0.000143544	0.00283478
ENSMUSG00000045875	Adra1a	adrenergic receptor, alpha 1a	13.6102	13.9062	38.4878	45.8646	3.0546	1.61098	0.000118173	0.00240332
ENSMUSG00000064344	mt-Tm	mitochondrially encoded tRNA methionine	541.516	521.123	1689.66	1562.36	3.04953	1.60858	0.000437992	0.00755054
ENSMUSG00000027981	Rnpc3	RNA-binding region (RNP1, RRM) containing 3	224.454	254.421	777.128	687.687	3.04819	1.60795	1.06003e-06	3.4748e-05
ENSMUSG00000025257	Ribc1	RIB43A domain with coiled-coils 1	45.4424	60.6405	163.72	160.099	3.04187	1.60496	0.000263502	0.00485072
ENSMUSG00000086561	Gm15540	predicted gene 15540	32.3383	37.5421	121.163	92.1282	3.04168	1.60487	0.00204636	0.0274797
ENSMUSG00000001901	Kcnh6	potassium voltage-gated channel, subfamily H (eag-related), member 6	6.47006	24.4444	48.5631	45.6972	3.03891	1.60355	0.00120305	0.0177418
ENSMUSG00000040856	Dlk1	delta-like 1 homolog (Drosophila)	266.408	216.546	835.743	631.041	3.02643	1.59762	2.01736e-06	6.24727e-05
ENSMUSG00000015134	Aldh1a3	aldehyde dehydrogenase family 1, subfamily A3	70.1024	64.9638	225.792	183.649	3.02077	1.59492	4.28513e-05	0.000987565
ENSMUSG00000025049	Taf5	TAF5 RNA polymerase II, TATA box binding protein (TBP)-associated factor	64.5107	75.6216	218.665	205.944	3.01946	1.59429	3.28496e-06	9.79174e-05
ENSMUSG00000042099	Kank3	KN motif and ankyrin repeat domains 3	688.428	646.519	2279.1	1765.66	3.01931	1.59422	7.53477e-07	2.57982e-05
ENSMUSG00000040929	Rfx3	regulatory factor X, 3 (influences HLA class II expression)	48.7607	57.6003	143.03	178.466	3.01195	1.5907	1.22848e-05	0.00032554
ENSMUSG00000032743	D430042O09Rik	RIKEN cDNA D430042O09 gene	473.203	595.787	1539.68	1681.72	3.00291	1.58636	2.07174e-06	6.39082e-05
ENSMUSG00000035390	Brsk1	BR serine/threonine kinase 1	7.60238	13.0064	25.2984	36.6988	2.99771	1.58386	0.00253782	0.0327884
ENSMUSG00000086907	Gm15298	predicted gene 15298	41.1052	46.15	159.14	102.466	2.98788	1.57912	0.00237472	0.031119
ENSMUSG00000050240	Hic2	hypermethylated in cancer 2	32.4381	29.7926	92.3818	93.8177	2.98145	1.57601	9.93845e-06	0.00026752
ENSMUSG00000005198	Polr2a	polymerase (RNA) II (DNA directed) polypeptide A	649.331	942.987	2176.22	2585.94	2.98021	1.57542	1.14874e-06	3.72655e-05
ENSMUSG00000084910	C630043F03Rik	RIKEN cDNA C630043F03 gene	95.3055	78.4298	325.98	191.798	2.96994	1.57043	0.0094789	0.0898444
ENSMUSG00000049811	Fam161a	family with sequence similarity 161, member A	40.3122	40.6907	121.587	119.247	2.96266	1.56689	5.80261e-05	0.00129601
ENSMUSG00000045912	C2cd4c	C2 calcium-dependent domain containing 4C	3.26239	1.99335	6.19208	9.42327	2.96012	1.56566	0.00814871	0.0802966
ENSMUSG00000024087	Cyp1b1	cytochrome P450, family 1, subfamily b, polypeptide 1	6.37559	7.01199	17.3919	22.3678	2.9593	1.56525	0.00110586	0.0165643
ENSMUSG00000050064	Zfp697	zinc finger protein 697	10.7304	13.4985	32.7826	39.1613	2.95885	1.56504	0.000186384	0.00356579
ENSMUSG00000043384	Gprasp1	G protein-coupled receptor associated sorting protein 1	74.5835	94.695	205.198	293.764	2.93707	1.55438	0.000426424	0.0073857
ENSMUSG00000018339	Gpx3	glutathione peroxidase 3	369.965	443.384	1440.05	952.93	2.93205	1.55191	0.00128744	0.0188006
ENSMUSG00000038059	2010002N04Rik	RIKEN cDNA 2010002N04 gene	75.3318	55.0424	183.06	200.392	2.93055	1.55117	1.56268e-05	0.000405549
ENSMUSG00000044676	Zfp612	zinc finger protein 612	31.8002	60.7712	130.288	141.676	2.92775	1.54979	5.1724e-05	0.00116836
ENSMUSG00000066357	Wdr6	WD repeat domain 6	235.888	233.025	669.741	707.937	2.9276	1.54972	1.40563e-06	4.48675e-05
ENSMUSG00000073538	E330020D12Rik	Riken cDNA E330020D12 gene	9.55128	9.53201	32.6863	23.3683	2.92717	1.5495	0.00591018	0.0632787
ENSMUSG00000036805	Noxa1	NADPH oxidase activator 1	31.2152	24.1986	64.6332	97.8061	2.92066	1.5463	0.0025314	0.0327409
ENSMUSG00000087371	Gm15541	predicted gene 15541	8.03391	5.39968	21.1895	18.1195	2.91572	1.54385	0.00637549	0.0669987
ENSMUSG00000063919	Srrm4	serine/arginine repetitive matrix 4	26.9668	39.0533	111.183	81.3742	2.90669	1.53938	0.000100137	0.00208264
ENSMUSG00000056043	Rgs9bp	regulator of G-protein signalling 9 binding protein	2.60067	4.04482	8.73002	10.6084	2.89981	1.53596	0.00615532	0.0651438
ENSMUSG00000031298	Gpr64	G protein-coupled receptor 64	23.8638	33.0639	75.2772	90.3012	2.89834	1.53523	3.31407e-05	0.000788114
ENSMUSG00000043079	Synpo	synaptopodin	91.0728	99.083	275.841	276.494	2.89441	1.53327	4.53053e-06	0.000131435
ENSMUSG00000062115	Rai1	retinoic acid induced 1	86.3796	87.3599	223.646	280.745	2.89276	1.53245	3.10523e-06	9.27914e-05
ENSMUSG00000022602	Arc	activity regulated cytoskeletal-associated protein	5.62135	5.24572	17.1064	14.4374	2.89249	1.53231	0.00994224	0.0933101
ENSMUSG00000031066	Usp11	ubiquitin specific peptidase 11	30.4887	33.946	86.51	99.7268	2.88007	1.5261	5.42286e-05	0.00121917
ENSMUSG00000015377	Fam116b	family with sequence similarity 116, member B	48.3244	44.2281	135.045	131.975	2.87483	1.52347	8.52613e-06	0.000232753
ENSMUSG00000044867	Gm3345	predicted gene 3345	20.7943	17.0143	59.904	49.081	2.87237	1.52224	0.00122338	0.0179972
ENSMUSG00000032898	Fbxo21	F-box protein 21	747.563	681.38	2266.16	1849.5	2.87009	1.5211	1.0476e-06	3.44052e-05
ENSMUSG00000087231	E230016M11Rik	RIKEN cDNA E230016M11 gene	16.7689	15.8543	36.244	57.6904	2.86891	1.5205	0.00778325	0.0775543
ENSMUSG00000053414	Hunk	hormonally upregulated Neu-associated kinase	74.9057	73.381	239.296	187.326	2.86696	1.51952	3.3704e-06	9.99648e-05
ENSMUSG00000050335	Lgals3	lectin, galactose binding, soluble 3	671.677	618.554	1801.63	1902.68	2.86082	1.51643	2.78773e-06	8.38285e-05
ENSMUSG00000014245	Pigl	phosphatidylinositol glycan anchor biosynthesis, class L	113.512	99.935	347.12	263.913	2.85266	1.51231	8.26122e-06	0.000226458
ENSMUSG00000090290	Gm17296	predicted gene, 17296	36.9215	100.803	188.892	205.038	2.85055	1.51124	0.000233272	0.00436148
ENSMUSG00000053552	Ebf4	early B cell factor 4	7.48213	5.41565	19.6633	17.2166	2.8492	1.51056	0.00922974	0.0881477
ENSMUSG00000028789	Adc	arginine decarboxylase	67.1832	44.443	172.184	146.88	2.84811	1.51001	4.06293e-05	0.000942726
ENSMUSG00000025262	Fam120c	family with sequence similarity 120, member C	11.8634	30.9162	59.696	62.5077	2.84688	1.50938	0.000106531	0.00219839
ENSMUSG00000022199	Slc22a17	solute carrier family 22 (organic cation transporter), member 17	46.8279	41.2183	118.273	132.333	2.83612	1.50392	6.23743e-05	0.00138149
ENSMUSG00000039384	Dusp10	dual specificity phosphatase 10	175.346	152.266	478.586	453.778	2.83584	1.50378	6.47799e-06	0.000181251
ENSMUSG00000054589	Gm9949	predicted gene 9949	33.9855	38.7622	127.893	78.8911	2.83276	1.50221	0.00769693	0.0770532
ENSMUSG00000003534	Ddr1	discoidin domain receptor family, member 1	196.95	149.236	504.692	470.001	2.80547	1.48824	4.72314e-06	0.00013636
ENSMUSG00000022822	Abcc5	ATP-binding cassette, sub-family C (CFTR/MRP), member 5	409.273	764.423	1754.81	1542.17	2.79947	1.48515	7.12814e-06	0.000197667
ENSMUSG00000074480	Mex3a	mex3 homolog A (C. elegans)	14.8195	17.5171	38.1236	52.6887	2.79831	1.48456	0.00017321	0.00334323
ENSMUSG00000056832	Ttc26	tetratricopeptide repeat domain 26	50.7192	86.7718	185.683	197.893	2.78017	1.47517	0.000922161	0.0142368
ENSMUSG00000021589	Rhobtb3	Rho-related BTB domain containing 3	196.587	234.313	601.89	596.109	2.77048	1.47013	1.10255e-05	0.000294751
ENSMUSG00000068959	Zfp619	zinc finger protein 619	10.1721	19.857	36.9937	46.3792	2.76676	1.4682	0.000238426	0.00445436
ENSMUSG00000043939	A530064D06Rik	RIKEN cDNA A530064D06 gene	27.4639	16.1514	65.4549	55.6248	2.76612	1.46786	0.000924175	0.0142451
ENSMUSG00000038930	Rccd1	RCC1 domain containing 1	70.4802	99.0475	254.082	216.129	2.76408	1.4668	9.49896e-05	0.00199998
ENSMUSG00000028019	Pdgfc	platelet-derived growth factor, C polypeptide	46.4074	39.6975	130.026	108.338	2.75854	1.4639	4.79068e-05	0.00109562
ENSMUSG00000078700	D030028A08Rik	RIKEN cDNA D030028A08 gene	5.55822	12.3619	22.0583	27.4029	2.75056	1.45973	0.00797987	0.0790242
ENSMUSG00000034235	Usp54	ubiquitin specific peptidase 54	44.1178	74.6998	154.76	173.089	2.74968	1.45926	4.18494e-05	0.000967276
ENSMUSG00000020635	Fkbp1b	FK506 binding protein 1b	30.2148	25.8462	71.8913	82.8067	2.74955	1.4592	0.00432051	0.0494282
ENSMUSG00000038831	Ralgps1	Ral GEF with PH domain and SH3 binding motif 1	69.1644	91.2819	211.632	230.977	2.74893	1.45887	3.80241e-05	0.000889191
ENSMUSG00000018861	Fdxr	ferredoxin reductase	560.733	417.585	1622.72	1075.11	2.74795	1.45835	0.00198363	0.0268708
ENSMUSG00000025485	Ric8	resistance to inhibitors of cholinesterase 8 homolog (C. elegans)	1077.82	903.908	3010.86	2441.91	2.74182	1.45513	3.88134e-06	0.000114267
ENSMUSG00000046785	Epm2aip1	EPM2A (laforin) interacting protein 1	252.837	350.267	847.839	809.732	2.73885	1.45357	5.98919e-06	0.000169228
ENSMUSG00000024177	Nme4	NME/NM23 nucleoside diphosphate kinase 4	76.3491	86.6069	214.218	233.535	2.73798	1.45311	0.000267441	0.00491187
ENSMUSG00000060227	Casc4	cancer susceptibility candidate 4	280.817	323.812	800.461	860.629	2.7376	1.45291	7.8987e-06	0.000218022
ENSMUSG00000092274	Neat1	nuclear paraspeckle assembly transcript 1 (non-protein coding)	3888.67	3701.46	10250.1	10522.2	2.72704	1.44734	3.98107e-06	0.000116772
ENSMUSG00000048285	Frmd6	FERM domain containing 6	98.5565	114.028	260.331	320.54	2.72271	1.44504	1.43512e-05	0.00037489
ENSMUSG00000022773	Ypel1	yippee-like 1 (Drosophila)	23.0219	27.0783	57.1029	79.7064	2.72095	1.44411	0.00629427	0.0662619
ENSMUSG00000023050	Map3k12	mitogen-activated protein kinase kinase kinase 12	35.5989	37.2189	105.378	93.3415	2.71943	1.4433	0.00028107	0.00514633
ENSMUSG00000035161	Ints6	integrator complex subunit 6	103.52	210.446	415.995	439.589	2.71572	1.44133	1.52698e-05	0.000397581
ENSMUSG00000052676	Zmat1	zinc finger, matrin type 1	34.9419	47.3256	114.219	109.685	2.71218	1.43945	8.62793e-05	0.00183438
ENSMUSG00000055980	Irs1	insulin receptor substrate 1	26.0498	62.9177	109.521	132.325	2.70902	1.43777	0.000949421	0.0145684
ENSMUSG00000029510	Gpc2	glypican 2 (cerebroglycan)	14.4572	13.9127	36.171	40.7102	2.70029	1.43312	0.00237668	0.0311276
ENSMUSG00000025504	Eps8l2	EPS8-like 2	962.839	1116.51	3302.88	2326.95	2.69817	1.43198	0.000343927	0.00612348
ENSMUSG00000029516	Cit	citron	64.5218	141.202	248.082	308.274	2.69504	1.43031	0.000746052	0.0120113
ENSMUSG00000006931	Leprel4	leprecan-like 4	167.768	141.369	324.907	511.142	2.69459	1.43007	0.00701066	0.0723052
ENSMUSG00000020546	Stxbp4	syntaxin binding protein 4	64.6507	107.617	243.306	222.139	2.69259	1.429	8.03512e-05	0.00172369
ENSMUSG00000030353	Tead4	TEA domain family member 4	24.4675	27.9065	63.1707	78.3108	2.69176	1.42855	0.0016084	0.0226562
ENSMUSG00000037805	Rpl10a	ribosomal protein L10A	305.95	327.97	918.16	792.7	2.68942	1.4273	2.41421e-05	0.000593631
ENSMUSG00000015944	Gatsl2	GATS protein-like 2	68.3082	68.8197	182.558	187.095	2.68614	1.42553	2.45597e-05	0.000602659
ENSMUSG00000025986	Slc39a10	solute carrier family 39 (zinc transporter), member 10	72.4028	124.546	235.522	295.218	2.68541	1.42514	6.44197e-05	0.00142152
ENSMUSG00000031310	Zmym3	zinc finger, MYM-type 3	400.407	427.712	1054.74	1173.68	2.68139	1.42298	1.34266e-05	0.000353834
ENSMUSG00000042377	Fam83g	family with sequence similarity 83, member G	26.5836	24.9407	82.269	56.2914	2.67988	1.42217	0.000904838	0.0140186
ENSMUSG00000070461	9230112E08Rik	RIKEN cDNA 9230112E08 gene	25.1845	37.2109	86.5152	81.1692	2.67815	1.42124	0.00185959	0.0254731
ENSMUSG00000040820	Hlcs	holocarboxylase synthetase (biotin-	88.7565	124.924	304.339	269.72	2.67724	1.42075	1.58656e-05	0.000410855
ENSMUSG00000032252	Glce	glucuronyl C5-epimerase	232.216	290.189	715.422	684.569	2.67054	1.41713	1.03846e-05	0.0002789
ENSMUSG00000030031	Kbtbd8	kelch repeat and BTB (POZ) domain containing 8	56.9814	122.398	244.27	235.684	2.66652	1.41496	6.67009e-05	0.00146914
ENSMUSG00000038827	BC026590	cDNA sequence BC026590	54.0397	90.2514	198.033	186.739	2.65746	1.41005	5.89051e-05	0.00131196
ENSMUSG00000023830	Igf2r	insulin-like growth factor 2 receptor	5750.42	9670.27	19446.5	21669.2	2.65701	1.4098	1.38994e-05	0.000364283
ENSMUSG00000040586	Ofd1	oral-facial-digital syndrome 1 gene homolog (human)	53.1422	59.5149	134.768	165.59	2.65664	1.4096	4.6798e-05	0.00107334
ENSMUSG00000026153	Fam135a	family with sequence similarity 135, member A	172.128	290.569	628.151	605.176	2.65633	1.40944	1.43328e-05	0.000374818
ENSMUSG00000031596	Slc7a2	solute carrier family 7 (cationic amino acid transporter, y+ system), member 2	1774.25	2483.71	6519.85	4792.88	2.64775	1.40477	0.000194956	0.00370603
ENSMUSG00000072437	Nanos1	nanos homolog 1 (Drosophila)	6.3432	6.44344	15.7335	18.2279	2.64654	1.40411	0.00862641	0.0837593
ENSMUSG00000020654	Adcy3	adenylate cyclase 3	25.1997	25.0997	70.9998	62.5304	2.64539	1.40348	0.000135694	0.00269761
ENSMUSG00000087138	Gm15545	predicted gene 15545	101.006	73.1096	254.052	207.67	2.64239	1.40185	0.00035054	0.00620882
ENSMUSG00000029563	Foxp2	forkhead box P2	196.157	208.298	490.19	582.026	2.64157	1.4014	4.18057e-05	0.000967203
ENSMUSG00000021366	Hivep1	human immunodeficiency virus type I enhancer binding protein 1	43.0435	77.9002	140.439	179.322	2.63466	1.39762	0.000327944	0.00587396
ENSMUSG00000026495	Efcab2	EF-hand calcium binding domain 2	27.0117	36.7599	76.9033	91.4794	2.63111	1.39567	0.000514218	0.00867053
ENSMUSG00000042757	Tmem108	transmembrane protein 108	10.5421	8.29643	24.8841	24.7608	2.62586	1.39279	0.00321866	0.0393289
ENSMUSG00000046404	Yod1	YOD1 OTU deubiquitinating enzyme 1 homologue (S. cerevisiae)	28.0845	71.7234	151.698	111.157	2.62483	1.39222	0.00935751	0.0889765
ENSMUSG00000054939	Zfp174	zinc finger protein 174	17.1606	20.3253	59.4935	38.9019	2.61587	1.38729	0.00401012	0.0467052
ENSMUSG00000063488	Zfp167	zinc finger protein 167	25.1557	37.6574	84.3996	80.1264	2.61023	1.38418	0.000716004	0.01159
ENSMUSG00000087574	C030037D09Rik	RIKEN cDNA C030037D09 gene	29.4471	25.1895	70.6926	72.3414	2.60857	1.38326	0.00413709	0.047843
ENSMUSG00000032393	Dpp8	dipeptidylpeptidase 8	391.529	712.293	1300.99	1576.91	2.59814	1.37748	7.12708e-05	0.00155687
ENSMUSG00000009108	Gnat2	guanine nucleotide binding protein, alpha transducing 2	45.2847	41.4087	116.937	108.992	2.59685	1.37676	0.00206205	0.0276437
ENSMUSG00000027834	Serpini1	serine (or cysteine) peptidase inhibitor, clade I, member 1	7.32754	10.4468	20.5667	25.7076	2.59427	1.37533	0.00904232	0.0867395
ENSMUSG00000035067	Xkr6	X Kell blood group precursor related family member 6 homolog	34.7595	53.9902	120.584	109.956	2.5887	1.37223	0.000663275	0.0108543
ENSMUSG00000037315	Phf16	PHD finger protein 16	88.8014	142.765	262.112	337.712	2.5812	1.36804	0.000188452	0.00359671
ENSMUSG00000027663	Zmat3	zinc finger matrin type 3	59.4577	57.8044	138.518	164.458	2.57451	1.3643	3.87216e-05	0.000902848
ENSMUSG00000057176	Gm166	predicted gene 166	19.6526	13.6591	42.1757	43.8866	2.57424	1.36414	0.00232427	0.0305585
ENSMUSG00000037594	BC022687	cDNA sequence BC022687	37.9965	17.1067	67.9775	74.2226	2.57112	1.3624	0.00193687	0.0263977
ENSMUSG00000031595	Pdgfrl	platelet-derived growth factor receptor-like	68.8685	55.9655	149.133	172.628	2.56823	1.36077	0.000249743	0.00464037
ENSMUSG00000029992	Gfpt1	glutamine fructose-6-phosphate transaminase 1	1019.73	1469	3101.9	3305.66	2.56565	1.35932	2.80267e-05	0.000677979
ENSMUSG00000074732	Zfp950	zinc finger prtoein 950	34.7213	57.486	119.821	117.265	2.56236	1.35747	0.00123852	0.0181863
ENSMUSG00000017679	Ttpal	tocopherol (alpha) transfer protein-like	568.483	690.481	1678.62	1555.97	2.56028	1.3563	2.46002e-05	0.000603032
ENSMUSG00000018927	Ccl6	chemokine (C-C motif) ligand 6	1267.96	1168.72	3459.67	2800.65	2.56019	1.35625	1.7045e-05	0.000436191
ENSMUSG00000079733	Tmem181b-ps	transmembrane protein 181B, pseudogene	69.6742	139.752	232.98	303.445	2.55249	1.35191	0.00269584	0.0341644
ENSMUSG00000050821	Fam131a	family with sequence similarity 131, member A	36.5722	33.0224	96.0589	82.1623	2.55183	1.35153	0.00137207	0.019829
ENSMUSG00000022346	Myc	myelocytomatosis oncogene	160.853	176.15	452.122	409.796	2.54864	1.34973	5.11742e-05	0.00115814
ENSMUSG00000039628	Hs3st6	heparan sulfate (glucosamine) 3-O-sulfotransferase 6	29.3747	20.7575	70.0779	58.0137	2.54599	1.34823	0.00547218	0.059878
ENSMUSG00000055707	Klhl26	kelch-like 26 (Drosophila)	97.7775	91.6912	253.339	230.559	2.54496	1.34764	5.67708e-05	0.00127273
ENSMUSG00000054967	Zfp647	zinc finger protein 647	30.0141	14.0795	59.8073	52.5606	2.53914	1.34434	0.00334488	0.0406072
ENSMUSG00000086213	A330040F15Rik	RIKEN cDNA A330040F15 gene	42.2294	37.3278	109.784	92.7923	2.53733	1.34331	0.0023985	0.031379
ENSMUSG00000025780	Itih5	inter-alpha (globulin) inhibitor H5	115.878	218.139	451.914	397.697	2.53495	1.34196	3.78918e-05	0.000887837
ENSMUSG00000054321	Taf4b	TAF4B RNA polymerase II, TATA box binding protein (TBP)-associated factor	9.97792	12.4149	26.2945	30.1488	2.51171	1.32867	0.00202679	0.0272936
ENSMUSG00000040213	Ccbl2	cysteine conjugate-beta lyase 2	8852.79	7011.36	23940.8	16044.5	2.51167	1.32865	0.0026709	0.0339024
ENSMUSG00000071337	Tia1	cytotoxic granule-associated RNA binding protein 1	412.343	610.483	1234.16	1340.49	2.50841	1.32677	6.72333e-05	0.0014795
ENSMUSG00000039004	Bmp6	bone morphogenetic protein 6	29.716	25.972	73.5672	66.5604	2.50739	1.32619	0.00099624	0.0151989
ENSMUSG00000032571	Pik3r4	phosphatidylinositol 3 kinase, regulatory subunit, polypeptide 4, p150	177.234	191.692	447.17	481.007	2.50698	1.32595	4.15776e-05	0.000962859
ENSMUSG00000071547	Nt5dc2	5'-nucleotidase domain containing 2	663.905	642.689	1779.81	1503.57	2.50411	1.3243	2.94056e-05	0.000708465
ENSMUSG00000020423	Btg2	B cell translocation gene 2, anti-proliferative	989.851	1097.74	2571.34	2673.42	2.50349	1.32394	3.08279e-05	0.000739002
ENSMUSG00000001039	B9d1	B9 protein domain 1	66.9883	48.8134	153.259	137.438	2.50135	1.3227	0.00445138	0.0506583
ENSMUSG00000031214	Ophn1	oligophrenin 1	120.344	152.049	326.75	356.693	2.50022	1.32205	0.000109667	0.00225336
ENSMUSG00000028986	Klhl7	kelch-like 7 (Drosophila)	162.153	191.267	473.175	412.018	2.49592	1.31957	4.8704e-05	0.00111172
ENSMUSG00000064340	mt-Tl1	mitochondrially encoded tRNA leucine 1	4670.57	6161.6	13266.8	13833.3	2.49306	1.31792	8.73658e-05	0.00185417
ENSMUSG00000059713	Rcan3	regulator of calcineurin 3	468.778	605.177	1352.06	1334.13	2.49249	1.31759	8.45987e-05	0.00180221
ENSMUSG00000022297	Fzd6	frizzled homolog 6 (Drosophila)	84.7322	73.1341	195.333	198.744	2.48737	1.31462	7.8004e-05	0.00167937
ENSMUSG00000035566	Pcdh17	protocadherin 17	25.541	57.0013	92.1524	113.732	2.48568	1.31364	0.00283703	0.0355948
ENSMUSG00000030605	Mfge8	milk fat globule-EGF factor 8 protein	1794.96	1350.74	4001.89	3843.92	2.48522	1.31337	2.22896e-05	0.00055436
ENSMUSG00000024998	Plce1	phospholipase C, epsilon 1	54.6955	83.3487	168.746	174.988	2.48138	1.31114	7.65266e-05	0.00165503
ENSMUSG00000059395	Nkapl	NFKB activating protein-like	24.6101	17.3907	44.6797	59.8658	2.48005	1.31037	0.00945703	0.0897084
ENSMUSG00000038335	Tsr1	TSR1, 20S rRNA accumulation, homolog (yeast)	366.186	504.881	1021.55	1145.91	2.47955	1.31008	8.20471e-05	0.00175534
ENSMUSG00000005823	Gpr108	G protein-coupled receptor 108	263.811	235.203	664.976	575.909	2.4779	1.30912	4.75443e-05	0.00108941
ENSMUSG00000002944	Cd36	CD36 antigen	1011.77	1109	2813.7	2451.41	2.47396	1.30682	3.07984e-05	0.000739002
ENSMUSG00000031618	Nr3c2	nuclear receptor subfamily 3, group C, member 2	89.3258	110.274	247.133	247.973	2.4718	1.30556	0.000121636	0.00246117
ENSMUSG00000030145	Zfp248	zinc finger protein 248	65.0777	94.208	199.53	195.501	2.47141	1.30533	0.00339488	0.0410827
ENSMUSG00000026107	Obfc2a	oligonucleotide/oligosaccharide-binding fold containing 2A	150.291	197.786	452.723	408.035	2.46431	1.30118	8.01148e-05	0.00172016
ENSMUSG00000031644	Nek1	NIMA (never in mitosis gene a)-related expressed kinase 1	141.031	197.488	377.574	457.067	2.45689	1.29683	0.000115637	0.00235978
ENSMUSG00000035356	Nfkbiz	nuclear factor of kappa light polypeptide gene enhancer in B cells inhibitor, zeta	114.894	148.484	259.147	388.285	2.44941	1.29243	0.00707675	0.0727354
ENSMUSG00000003233	Dvl3	dishevelled 3, dsh homolog (Drosophila)	113.544	257.226	439.413	471.386	2.4481	1.29166	0.000655829	0.0107693
ENSMUSG00000085156	Gm11974	predicted gene 11974	122.567	115.999	299.68	286.03	2.44645	1.29069	0.0013227	0.0191981
ENSMUSG00000038859	Baiap2l1	BAI1-associated protein 2-like 1	504.927	606.17	1569.31	1154.98	2.44344	1.28892	0.000201853	0.00383103
ENSMUSG00000054942	Fam73a	family with sequence similarity 73, member A	47.0699	58.7503	144.558	114.465	2.4393	1.28647	0.000136791	0.00271715
ENSMUSG00000024901	Peli3	pellino 3	73.3303	48.2521	145.996	151.549	2.43843	1.28595	0.00746818	0.0755628
ENSMUSG00000040785	Ttc3	tetratricopeptide repeat domain 3	1865.44	3223.81	5736.77	6715.21	2.43821	1.28582	9.18756e-05	0.00194298
ENSMUSG00000036617	Etl4	enhancer trap locus 4	141.533	226.835	394.732	506.262	2.43732	1.2853	0.000384004	0.00673163
ENSMUSG00000024253	Dync2li1	dynein cytoplasmic 2 light intermediate chain 1	87.0147	74.4336	206.952	187.596	2.43515	1.28401	0.000535587	0.00900212
ENSMUSG00000034160	Ogt	O-linked N-acetylglucosamine (GlcNAc) transferase (UDP-N-acetylglucosamine:polypeptide-N-acetylglucosaminyl transferase)	734.3	1080.25	2060.47	2371.59	2.43396	1.28331	7.71209e-05	0.00166437
ENSMUSG00000038836	Agbl3	ATP/GTP binding protein-like 3	64.6349	64.9052	158.237	157.488	2.42867	1.28016	0.000212498	0.00401711
ENSMUSG00000025450	Gm9752	predicted gene 9752	25.7622	21.5365	61.4247	53.8406	2.42833	1.27997	0.00170487	0.0237074
ENSMUSG00000037363	Letm2	leucine zipper-EF-hand containing transmembrane protein 2	20.7779	23.4867	59.4114	48.0951	2.42028	1.27518	0.00397823	0.0464017
ENSMUSG00000004383	Large	like-glycosyltransferase	114.144	136.116	302.385	304.398	2.4161	1.27268	0.000124944	0.00252047
ENSMUSG00000058881	Zfp516	zinc finger protein 516	50.6574	73.5454	144.45	156.52	2.41475	1.27187	0.000154584	0.00303025
ENSMUSG00000023046	Igfbp6	insulin-like growth factor binding protein 6	142.805	85.0313	301.486	248.179	2.4039	1.26538	0.000342216	0.00609758
ENSMUSG00000039137	Whrn	whirlin	20.7029	22.2634	47.5617	56.0313	2.40245	1.26451	0.00350035	0.0420183
ENSMUSG00000027358	Bmp2	bone morphogenetic protein 2	215.026	183.187	480.439	476.94	2.39563	1.2604	8.2536e-05	0.00176422
ENSMUSG00000043998	Mgat2	mannoside acetylglucosaminyltransferase 2	702.521	637.614	1795.06	1426.71	2.39563	1.2604	5.00209e-05	0.00113743
ENSMUSG00000051890	Klhdc1	kelch domain containing 1	43.0468	64.4399	120.699	137.113	2.39016	1.25711	0.0063896	0.0671175
ENSMUSG00000047767	Atg16l2	autophagy related 16 like 2 (S. cerevisiae)	343.135	368.886	984.917	719.221	2.38509	1.25404	0.000269987	0.00495101
ENSMUSG00000061393	Acvr2b	activin receptor IIB	22.7279	27.9961	53.6479	67.483	2.37957	1.2507	0.00771244	0.0771761
ENSMUSG00000052783	Grk4	G protein-coupled receptor kinase 4	87.2678	70.1711	195.15	180.799	2.37941	1.2506	0.00177046	0.0245337
ENSMUSG00000023008	Fmnl3	formin-like 3	148.649	167.395	312.852	441.53	2.3784	1.24999	0.00144866	0.0206868
ENSMUSG00000028621	Cyb5rl	cytochrome b5 reductase-like	180.533	153.601	454.53	340.883	2.37217	1.24621	0.000163762	0.00318923
ENSMUSG00000050605	Zfp61	zinc finger protein 61	59.0358	51.9429	121.073	142.958	2.37058	1.24524	0.00464546	0.0523375
ENSMUSG00000035640	Dos	downstream of Stk11	178.463	120.521	323.331	387.635	2.36929	1.24445	0.00102312	0.0155198
ENSMUSG00000036641	Ccdc148	coiled-coil domain containing 148	38.3636	53.5784	129.824	88.4759	2.36623	1.24259	0.0055113	0.0601682
ENSMUSG00000031949	Adat1	adenosine deaminase, tRNA-specific 1	54.676	55.4497	129.356	132.08	2.36557	1.24219	0.000557188	0.00932919
ENSMUSG00000042426	Dhx29	DEAH (Asp-Glu-Ala-His) box polypeptide 29	124.054	158.118	335.653	333.222	2.36217	1.24011	0.00016116	0.00314368
ENSMUSG00000032300	1700017B05Rik	RIKEN cDNA 1700017B05 gene	155.56	160.059	387.758	360.071	2.36107	1.23944	0.000113245	0.00231692
ENSMUSG00000038545	Cul7	cullin 7	421.424	441.285	1034.32	1002.89	2.35309	1.23455	0.000105697	0.00218307
ENSMUSG00000036206	Sh3bp4	SH3-domain binding protein 4	76.4424	70.3815	154.252	192.332	2.35206	1.23392	0.000476778	0.00813572
ENSMUSG00000052911	Lamb2	laminin, beta 2	145.333	133.081	310.665	346.104	2.35054	1.23299	0.000133904	0.00267092
ENSMUSG00000020444	Guk1	guanylate kinase 1	2595.84	1824.59	5264.29	5153.02	2.34817	1.23153	8.37226e-05	0.00178798
ENSMUSG00000040711	Sh3pxd2b	SH3 and PX domains 2B	46.9902	81.9788	142.104	161.49	2.34584	1.2301	0.000415925	0.00722753
ENSMUSG00000033082	Clec1a	C-type lectin domain family 1, member a	25.2489	33.8237	65.7605	73.1001	2.34243	1.228	0.00177537	0.0245731
ENSMUSG00000031169	Porcn	porcupine homolog (Drosophila)	59.6208	40.944	130.694	105.593	2.34124	1.22727	0.000999954	0.0152458
ENSMUSG00000020473	Aebp1	AE binding protein 1	228.535	209.643	438.945	590.222	2.34026	1.22667	0.000211079	0.00399978
ENSMUSG00000086629	2810403D21Rik	RIKEN cDNA 2810403D21 gene	78.807	47.3323	141.766	154.187	2.33771	1.22509	0.00321671	0.0393253
ENSMUSG00000023349	Clec4n	C-type lectin domain family 4, member n	715.608	684.57	1853.09	1422.24	2.33105	1.22098	0.000110036	0.00225901
ENSMUSG00000003134	Tbc1d8	TBC1 domain family, member 8	123.889	180.13	425.475	284.817	2.32841	1.21934	0.00934536	0.0889318
ENSMUSG00000045039	Megf8	multiple EGF-like-domains 8	50.3459	57.8178	116.694	135.932	2.32731	1.21867	0.000288243	0.0052495
ENSMUSG00000022875	Kng1	kininogen 1	96106.7	92020.2	233705	205457	2.32618	1.21796	8.15419e-05	0.00174609
ENSMUSG00000027953	Slc50a1	solute carrier family 50 (sugar transporter), member 1	543.834	379.199	1193.34	961.154	2.32585	1.21776	0.000125094	0.00252047
ENSMUSG00000000732	Icosl	icos ligand	61.5738	63.302	159.464	131.742	2.32381	1.21649	0.000513182	0.00866529
ENSMUSG00000019874	Fabp7	fatty acid binding protein 7, brain	116.487	101.226	235.452	271.428	2.31984	1.21403	0.00179161	0.0247406
ENSMUSG00000028188	Spata1	spermatogenesis associated 1	27.5694	24.2768	60.4422	60.1899	2.31845	1.21316	0.00567425	0.0614432
ENSMUSG00000038664	Herc1	hect (homologous to the E6-AP (UBE3A) carboxyl terminus) domain and RCC1 (CHC1)-like domain (RLD) 1	452.569	976.593	1577.69	1746.97	2.31831	1.21307	0.00149162	0.0212494
ENSMUSG00000002109	Ddb2	damage specific DNA binding protein 2	64.1814	107.45	203.451	195.036	2.31376	1.21024	0.00108995	0.0163876
ENSMUSG00000085037	4933421O10Rik	RIKEN cDNA 4933421O10 gene	53.0149	41.5417	113.821	105.365	2.30978	1.20776	0.000477389	0.00813572
ENSMUSG00000064284	2210021J22Rik	RIKEN cDNA 2210021J22 gene	333.233	217.875	720.014	557.312	2.3095	1.20758	0.000309872	0.00557536
ENSMUSG00000025352	Gdf11	growth differentiation factor 11	15.7142	13.1143	34.3891	32.2719	2.30411	1.20421	0.00403517	0.0469283
ENSMUSG00000033777	Tlr13	toll-like receptor 13	81.2144	136.394	253.526	249.296	2.3027	1.20332	0.000681215	0.0111098
ENSMUSG00000046380	Jrk	jerky	26.029	22.7294	54.5498	58.1257	2.30264	1.20329	0.00090053	0.0139708
ENSMUSG00000023913	Pla2g7	phospholipase A2, group VII (platelet-activating factor acetylhydrolase, plasma)	1070.97	1400.79	3191.67	2512.76	2.29989	1.20156	0.000164209	0.00319531
ENSMUSG00000034320	Slc26a2	solute carrier family 26 (sulfate transporter), member 2	128.905	202.473	335.55	429.057	2.29926	1.20117	0.000739758	0.011918
ENSMUSG00000068742	Cry2	cryptochrome 2 (photolyase-like)	709.798	584.567	1704.25	1281.23	2.29842	1.20064	0.000135339	0.0026928
ENSMUSG00000038538	Ubn2	ubinuclein 2	219.574	335.543	578.496	700.828	2.29652	1.19945	0.000310943	0.00558622
ENSMUSG00000004929	Thop1	thimet oligopeptidase 1	497.862	468.608	1200.94	1022.92	2.29292	1.19719	0.000223976	0.00421408
ENSMUSG00000036019	Tmtc2	transmembrane and tetratricopeptide repeat containing 2	296.825	492.711	857.475	954.883	2.2875	1.19377	0.000361749	0.00639313
ENSMUSG00000028431	Ikbkap	inhibitor of kappa light polypeptide enhancer in B cells, kinase complex-associated protein	976.173	1208.13	2364.68	2647.19	2.28641	1.19308	0.00026003	0.00480254
ENSMUSG00000024388	Myo7b	myosin VIIB	7.28932	12.2696	20.8544	23.967	2.28363	1.19133	0.00588761	0.0631503
ENSMUSG00000061665	Cd2ap	CD2-associated protein	387.268	631.716	1124.78	1207.14	2.28053	1.18937	0.000260282	0.00480254
ENSMUSG00000044794	9330133O14Rik	RIKEN cDNA 9330133O14 gene	75.1047	57.5534	160.099	143.448	2.28005	1.18907	0.000907282	0.01403
ENSMUSG00000041491	Cep78	centrosomal protein 78	75.1544	100.875	195.464	206.467	2.27533	1.18608	0.000766699	0.0122446
ENSMUSG00000049076	Acap2	ArfGAP with coiled-coil, ankyrin repeat and PH domains 2	209.563	348.476	571.355	702.636	2.275	1.18587	0.000509017	0.00860106
ENSMUSG00000017314	Mpp2	membrane protein, palmitoylated 2 (MAGUK p55 subfamily member 2)	69.0977	97.8962	210.136	171.049	2.27478	1.18573	0.00517584	0.0572918
ENSMUSG00000020176	Grb10	growth factor receptor bound protein 10	9977.14	15486.6	29703.2	28404	2.27407	1.18528	0.000212116	0.00401623
ENSMUSG00000079317	Trappc2	trafficking protein particle complex 2	193.131	137.086	443.85	307.866	2.26841	1.18168	0.00414078	0.0478534
ENSMUSG00000001379	Apbb3	amyloid beta (A4) precursor protein-binding, family B, member 3	185.826	160.897	444.461	343.546	2.26476	1.17936	0.000284496	0.00519188
ENSMUSG00000038393	Txnip	thioredoxin interacting protein	9660.84	8666.43	25085.5	16563.1	2.2646	1.17925	0.00679874	0.0704849
ENSMUSG00000037652	Phc3	polyhomeotic-like 3 (Drosophila)	203.696	394.807	608.804	750.728	2.26367	1.17866	0.00340698	0.0411665
ENSMUSG00000037533	Rapgef6	Rap guanine nucleotide exchange factor (GEF) 6	202.225	423.777	643.856	774.953	2.25863	1.17545	0.00493267	0.0550081
ENSMUSG00000057738	Spna2	spectrin alpha 2	2802.13	4374.18	8375.17	7827.36	2.24999	1.16992	0.00026224	0.0048312
ENSMUSG00000027300	Ubox5	U box domain containing 5	56.2665	54.3416	131.536	118.14	2.24936	1.16951	0.000770693	0.0123002
ENSMUSG00000015501	Hivep2	human immunodeficiency virus type I enhancer binding protein 2	24.7095	32.3189	56.4991	72.0599	2.24632	1.16756	0.000880817	0.0137454
ENSMUSG00000044149	Nkrf	NF-kappaB repressing factor	53.3562	57.8671	121.821	128.783	2.2452	1.16684	0.00104575	0.0157728
ENSMUSG00000022122	Ednrb	endothelin receptor type B	548.175	767.196	1472.68	1485.2	2.24087	1.16406	0.000297655	0.00537987
ENSMUSG00000031668	Eif2ak3	eukaryotic translation initiation factor 2 alpha kinase 3	544.374	725.868	1541.61	1314.03	2.24033	1.16371	0.000288588	0.00525173
ENSMUSG00000061143	Maml3	mastermind like 3 (Drosophila)	29.9468	51.2338	77.3794	104.926	2.23779	1.16208	0.00849839	0.0826844
ENSMUSG00000086914	Gm16124	predicted gene 16124	108.618	90.3324	250.931	195.549	2.23628	1.1611	0.00660799	0.0688962
ENSMUSG00000024654	Asrgl1	asparaginase like 1	179.306	153.971	413.628	334.272	2.23618	1.16104	0.000349766	0.00619971
ENSMUSG00000026048	Ercc5	excision repair cross-complementing rodent repair deficiency, complementation group 5	488.063	650.025	1384.73	1164.44	2.23214	1.15842	0.000398946	0.00696798
ENSMUSG00000039849	Pcif1	PDX1 C-terminal inhibiting factor 1	1912.23	1728.8	4348.16	3807.25	2.23196	1.15831	0.000226641	0.00424748
ENSMUSG00000039220	Ppp1r10	protein phosphatase 1, regulatory subunit 10	1176.81	1485.23	3526.5	2424.83	2.22797	1.15573	0.00515484	0.0571122
ENSMUSG00000030660	Pik3c2a	phosphatidylinositol 3-kinase, C2 domain containing, alpha polypeptide	121.769	205.179	381.202	349.387	2.2269	1.15504	0.000395703	0.00691639
ENSMUSG00000031255	Sytl4	synaptotagmin-like 4	76.3166	94.0965	176.545	204.089	2.22571	1.15427	0.000980537	0.014988
ENSMUSG00000071456	1110002L01Rik	RIKEN cDNA 1110002L01 gene	28.1981	54.7361	89.0761	96.1251	2.22542	1.15408	0.00933809	0.0889318
ENSMUSG00000024163	Mapk8ip3	mitogen-activated protein kinase 8 interacting protein 3	285.133	327.17	669.069	697.44	2.22389	1.15309	0.000380486	0.00667976
ENSMUSG00000051451	Crebzf	CREB/ATF bZIP transcription factor	1071.88	1203.79	2640.36	2437.92	2.22374	1.15299	0.000313082	0.00561198
ENSMUSG00000020326	Ccng1	cyclin G1	463.883	551.094	1099.92	1164.55	2.22321	1.15264	0.000374756	0.00658887
ENSMUSG00000022037	Clu	clusterin	56398.2	35855.7	116262	89351.7	2.22084	1.15111	0.000754121	0.0120923
ENSMUSG00000030979	Uros	uroporphyrinogen III synthase	469.292	454.964	1203.06	856.646	2.22075	1.15105	0.00126262	0.0184833
ENSMUSG00000085235	Gm12576	predicted gene 12576	16.4096	19.7395	40.1709	40.3373	2.21931	1.15011	0.00870998	0.0843992
ENSMUSG00000042607	Asb4	ankyrin repeat and SOCS box-containing 4	53.4302	69.7602	121.306	153.051	2.21922	1.15005	0.00236892	0.0310771
ENSMUSG00000039865	Slc44a3	solute carrier family 44, member 3	489.142	482.951	1147.59	1009.36	2.21108	1.14475	0.000284459	0.00519188
ENSMUSG00000044788	Fads6	fatty acid desaturase domain family, member 6	757.378	1110.41	2427.39	1714.26	2.20984	1.14394	0.00593821	0.063465
ENSMUSG00000054074	2810030E01Rik	RIKEN cDNA 2810030E01 gene	104.412	59.012	180.16	181.78	2.20669	1.14189	0.00432587	0.0494658
ENSMUSG00000040165	Cd209c	CD209c antigen	97.9006	155.236	249.679	310.843	2.20655	1.14179	0.00598203	0.063762
ENSMUSG00000026074	Map4k4	mitogen-activated protein kinase kinase kinase kinase 4	340.264	469.538	840.811	951.373	2.20535	1.14101	0.000443283	0.00763074
ENSMUSG00000030895	Hpx	hemopexin	266781	211046	601237	455301	2.20335	1.1397	0.00022489	0.0042246
ENSMUSG00000041096	Tspyl2	TSPY-like 2	86.1016	94.6961	195.258	204.087	2.201	1.13816	0.00103062	0.0156137
ENSMUSG00000041161	Otud3	OTU domain containing 3	88.67	128.545	276.684	202.163	2.19696	1.13551	0.00314413	0.0386357
ENSMUSG00000038871	Bpgm	2,3-bisphosphoglycerate mutase	2649.75	2350.42	5858.31	5154.55	2.19472	1.13404	0.000282312	0.00516512
ENSMUSG00000027296	Itpka	inositol 1,4,5-trisphosphate 3-kinase A	116.465	98.1604	244.694	227.228	2.19102	1.1316	0.00104351	0.0157588
ENSMUSG00000026200	Glb1l	galactosidase, beta 1-like	69.7558	90.4887	166.126	185.988	2.18963	1.13068	0.00204574	0.0274797
ENSMUSG00000034300	Fam53c	family with sequence similarity 53, member C	263.904	243.441	557.263	556.115	2.18673	1.12877	0.000381268	0.00668858
ENSMUSG00000063077	Kif1b	kinesin family member 1B	1201.6	1781.34	3191.67	3351.87	2.18602	1.12831	0.000473363	0.00808442
ENSMUSG00000020262	Adarb1	adenosine deaminase, RNA-specific, B1	113.131	149.818	256.462	320.164	2.18517	1.12775	0.000963634	0.014777
ENSMUSG00000021668	Polk	polymerase (DNA directed), kappa	53.246	83.4364	133.828	165.75	2.1841	1.12704	0.00181084	0.0249495
ENSMUSG00000027796	Smad9	MAD homolog 9 (Drosophila)	53.9448	45.4008	130.312	87.399	2.18381	1.12685	0.00731238	0.0745475
ENSMUSG00000048218	Amigo2	adhesion molecule with Ig like domain 2	130.145	142.871	356.679	241.514	2.18351	1.12665	0.00606724	0.0644689
ENSMUSG00000053226	Dand5	DAN domain family, member 5	47.1775	25.2227	90.9007	67.5129	2.1802	1.12446	0.0078662	0.078223
ENSMUSG00000020900	Myh10	myosin, heavy polypeptide 10, non-muscle	466.161	933.85	1406.92	1655.87	2.18013	1.12441	0.00425892	0.0488405
ENSMUSG00000048100	Taf13	TAF13 RNA polymerase II, TATA box binding protein (TBP)-associated factor	567.136	358.528	1107.46	916.444	2.17863	1.12342	0.000348574	0.00618777
ENSMUSG00000028059	Arhgef2	rho/rac guanine nucleotide exchange factor (GEF) 2	845.269	1212.13	1943.94	2550.81	2.17697	1.12232	0.00151364	0.0214989
ENSMUSG00000033831	Fgb	fibrinogen beta chain	115739	100942	272252	200739	2.17525	1.12118	0.000504322	0.00855198
ENSMUSG00000057894	Zfp329	zinc finger protein 329	58.1437	93.7748	145.054	185.871	2.17067	1.11814	0.0026686	0.0338913
ENSMUSG00000060671	Atp8b2	ATPase, class I, type 8B, member 2	757.276	924.631	1730.05	1933.42	2.17048	1.11802	0.000749726	0.0120567
ENSMUSG00000018900	Slc22a5	solute carrier family 22 (organic cation transporter), member 5	457.474	484.135	1128.82	921.52	2.16989	1.11762	0.000644304	0.0106166
ENSMUSG00000020289	Nprl3	nitrogen permease regulator-like 3 (S. cerevisiae)	616.41	621.186	1471.56	1222.01	2.16883	1.11692	0.000587272	0.00977122
ENSMUSG00000039318	Rab3gap2	RAB3 GTPase activating protein subunit 2	126.822	184.177	338.126	338.549	2.16825	1.11653	0.000636715	0.010506
ENSMUSG00000024640	Psat1	phosphoserine aminotransferase 1	2171.13	2581.98	5038.22	5303.61	2.16815	1.11646	0.000537206	0.00901992
ENSMUSG00000042446	Zmym4	zinc finger, MYM-type 4	974.405	1447.89	2273.74	2996.04	2.16786	1.11627	0.00242731	0.0316692
ENSMUSG00000025854	Fam20c	family with sequence similarity 20, member C	3177.41	2681.68	7233.52	5511.67	2.16765	1.11613	0.000266509	0.00490229
ENSMUSG00000026596	Abl2	v-abl Abelson murine leukemia viral oncogene homolog 2 (arg, Abelson-related gene)	127.654	213.141	322.298	418.211	2.16527	1.11454	0.0045448	0.0514761
ENSMUSG00000057335	Cep170	centrosomal protein 170	53.0185	87.4387	131.176	173.48	2.16142	1.11198	0.00613646	0.0650306
ENSMUSG00000029777	Gars	glycyl-tRNA synthetase	1194.03	1126.14	2614.38	2418.03	2.16133	1.11192	0.000367779	0.00649009
ENSMUSG00000082361	Btc	betacellulin, epidermal growth factor family member	21.6531	22.6899	49.6913	46.4797	2.16117	1.11181	0.0079461	0.0787552
ENSMUSG00000003847	Nfat5	nuclear factor of activated T cells 5	182.816	359.551	524.116	652.051	2.16105	1.11173	0.00848323	0.0826054
ENSMUSG00000040097	Flywch1	FLYWCH-type zinc finger 1	137.473	153.78	332.698	297.454	2.15602	1.10837	0.000835858	0.0131642
ENSMUSG00000026577	Blzf1	basic leucine zipper nuclear factor 1	251.565	340.248	639.802	640.507	2.15582	1.10824	0.000922449	0.0142368
ENSMUSG00000074746	Pdzd8	PDZ domain containing 8	168.315	260.291	441.215	485.448	2.15451	1.10736	0.000750147	0.0120567
ENSMUSG00000030337	Vamp1	vesicle-associated membrane protein 1	61.2184	67.2605	138.192	139.381	2.15285	1.10625	0.00192763	0.0262994
ENSMUSG00000032122	Slc37a2	solute carrier family 37 (glycerol-3-phosphate transporter), member 2	53.3931	69.6403	133.541	132.072	2.15133	1.10523	0.00209323	0.0280302
ENSMUSG00000035545	Leng8	leukocyte receptor cluster (LRC) member 8	2249.54	2711.05	5329.66	5363.47	2.14806	1.10303	0.000567194	0.00946354
ENSMUSG00000009569	Mkl2	MKL/myocardin-like 2	246.426	422.004	704.692	734.962	2.14633	1.10188	0.00088399	0.0137769
ENSMUSG00000038172	Ttc39b	tetratricopeptide repeat domain 39B	323.575	419.14	726.774	871.641	2.14453	1.10066	0.00153552	0.0217838
ENSMUSG00000002031	Ift46	intraflagellar transport 46 homolog (Chlamydomonas)	1452.91	995.855	2747.7	2514.33	2.14115	1.09839	0.000436959	0.00753817
ENSMUSG00000021182	Ccdc88c	coiled-coil domain containing 88C	39.2765	54.0944	93.4297	107.144	2.1406	1.09802	0.00165827	0.0231537
ENSMUSG00000030685	Kctd13	potassium channel tetramerisation domain containing 13	123.533	127.386	282.063	256.852	2.14022	1.09776	0.00328971	0.0400777
ENSMUSG00000052392	Acot4	acyl-CoA thioesterase 4	537.462	598.664	1071.27	1364.44	2.13623	1.09507	0.000905958	0.0140186
ENSMUSG00000023043	Krt18	keratin 18	6605.53	5378.4	12725.5	12945	2.13442	1.09384	0.000408813	0.00713511
ENSMUSG00000036330	Slc18a1	solute carrier family 18 (vesicular monoamine), member 1	168.309	179.967	422.419	323.497	2.13429	1.09376	0.00140023	0.0201761
ENSMUSG00000071714	Csf2rb2	colony stimulating factor 2 receptor, beta 2, low-affinity (granulocyte-macrophage)	60.0869	69.0135	128.375	147.913	2.13252	1.09256	0.00154376	0.0218642
ENSMUSG00000038256	Bcl9	B cell CLL/lymphoma 9	531.946	647.246	1110.13	1412.39	2.1316	1.09194	0.0014298	0.0204664
ENSMUSG00000040560	Wdr7	WD repeat domain 7	105.338	147.432	280.988	259.612	2.13129	1.09173	0.000807733	0.0128313
ENSMUSG00000032119	Hinfp	histone H4 transcription factor	50.4125	77.3688	143.526	129.363	2.12824	1.08966	0.00357937	0.042835
ENSMUSG00000055204	Ankrd17	ankyrin repeat domain 17	224.922	423.513	643.629	738.941	2.12478	1.08731	0.00234054	0.0307385
ENSMUSG00000038485	Socs7	suppressor of cytokine signaling 7	133.723	163.614	311.314	322.678	2.12475	1.08729	0.00103545	0.0156669
ENSMUSG00000026663	Atf6	activating transcription factor 6	279.746	355.647	666.846	687.812	2.12453	1.08714	0.000712026	0.0115335
ENSMUSG00000029762	Akr1b8	aldo-keto reductase family 1, member B8	349.887	283.61	680.161	669.775	2.12332	1.08632	0.000985534	0.0150548
ENSMUSG00000042857	Gm9776	predicted gene 9776	26.1218	21.0042	49.76	50.6456	2.12296	1.08608	0.00766834	0.0768636
ENSMUSG00000028696	Ipp	IAP promoted placental gene	170.655	249.803	474.691	420.923	2.12274	1.08593	0.00117384	0.0173971
ENSMUSG00000020580	Rock2	Rho-associated coiled-coil containing protein kinase 2	137.77	250.162	366.938	459.091	2.1219	1.08535	0.00621837	0.0655785
ENSMUSG00000072623	Zfp9	zinc finger protein 9	38.843	53.3643	95.5918	100.413	2.11827	1.08289	0.00279678	0.0351822
ENSMUSG00000011148	Adssl1	adenylosuccinate synthetase like 1	299.725	241.006	681.775	465.841	2.11492	1.0806	0.00703191	0.072408
ENSMUSG00000025212	Sfxn3	sideroflexin 3	72.2226	69.6769	141.484	159.129	2.11094	1.07788	0.00222273	0.0295161
ENSMUSG00000027405	Nop56	NOP56 ribonucleoprotein homolog (yeast)	1036.65	1138.98	2374.59	2231.48	2.10969	1.07703	0.000804902	0.0127948
ENSMUSG00000044636	Csrnp2	cysteine-serine-rich nuclear protein 2	46.0341	38.0871	94.0146	84.0266	2.10898	1.07655	0.00201046	0.0271197
ENSMUSG00000035413	Tmem98	transmembrane protein 98	323.193	227.532	643.532	521.784	2.10845	1.07618	0.000699257	0.0113575
ENSMUSG00000056234	Ncoa4	nuclear receptor coactivator 4	3648.58	3634.88	9053.97	6338.72	2.10605	1.07454	0.00333137	0.0405265
ENSMUSG00000035299	Mid1	midline 1	142.478	156.401	310.203	321.461	2.10599	1.0745	0.00137281	0.019829
ENSMUSG00000011158	Brf1	BRF1 homolog, subunit of RNA polymerase III transcription initiation factor IIIB (S. cerevisiae)	261.643	286.654	608.054	549.697	2.10415	1.07323	0.000861327	0.0134853
ENSMUSG00000021244	Ylpm1	YLP motif containing 1	222.671	360.294	557.675	672.071	2.10209	1.07183	0.00135241	0.0195936
ENSMUSG00000041483	Zfp281	zinc finger protein 281	179.189	246.922	491.648	406.483	2.10048	1.07072	0.000872145	0.0136278
ENSMUSG00000021116	Eif2s1	eukaryotic translation initiation factor 2, subunit 1 alpha	566.047	605.451	1283.75	1181.56	2.09702	1.06834	0.000709486	0.0115001
ENSMUSG00000002833	Hdgfrp2	hepatoma-derived growth factor, related protein 2	679.872	595.771	1424.43	1259.73	2.09672	1.06814	0.000620762	0.0102783
ENSMUSG00000030451	Herc2	hect (homologous to the E6-AP (UBE3A) carboxyl terminus) domain and RCC1 (CHC1)-like domain (RLD) 2	77.2248	163.19	253.823	251.769	2.09582	1.06751	0.00487136	0.0544516
ENSMUSG00000029432	Gbas	glioblastoma amplified sequence	859.391	803.043	1944.24	1551.73	2.09555	1.06733	0.00065384	0.0107514
ENSMUSG00000024426	Atat1	alpha tubulin acetyltransferase 1	463.165	397.863	963.717	846.252	2.09467	1.06672	0.00115855	0.0172238
ENSMUSG00000049470	Aff4	AF4/FMR2 family, member 4	3805.65	6407.34	10496.5	10966.9	2.0943	1.06647	0.00108809	0.01637
ENSMUSG00000063894	Zfp192	zinc finger protein 192	459.676	777.816	1155	1439.54	2.08929	1.06301	0.00389375	0.0455498
ENSMUSG00000029752	Asns	asparagine synthetase	2329.81	2515.8	5983.68	4160.28	2.0862	1.06088	0.00474578	0.0532223
ENSMUSG00000033009	Ogfod1	2-oxoglutarate and iron-dependent oxygenase domain containing 1	745.226	946.747	1814.22	1726.89	2.08559	1.06045	0.00118796	0.0175628
ENSMUSG00000021824	Ap3m1	adaptor-related protein complex 3, mu 1 subunit	3081.33	4268.35	8446.14	6910.92	2.08229	1.05817	0.000849544	0.0133533
ENSMUSG00000054893	Zfp667	zinc finger protein 667	20.4733	21.701	47.1526	40.9269	2.08116	1.05739	0.00906263	0.0868959
ENSMUSG00000039652	Cpeb3	cytoplasmic polyadenylation element binding protein 3	109.224	167.218	283.95	293.214	2.08058	1.05699	0.00205399	0.0275666
ENSMUSG00000010830	Kdelr3	KDEL (Lys-Asp-Glu-Leu) endoplasmic reticulum protein retention receptor 3	154.144	121.497	248.874	326.306	2.07912	1.05598	0.00288525	0.036086
ENSMUSG00000032565	Nudt16	nudix (nucleoside diphosphate linked moiety X)-type motif 16	168.676	131.849	339.553	286.758	2.07667	1.05427	0.00161901	0.0227252
ENSMUSG00000056459	Zbtb25	zinc finger and BTB domain containing 25	46.7582	74.2813	132.711	119.465	2.07625	1.05398	0.00750904	0.0757576
ENSMUSG00000038065	2410066E13Rik	RIKEN cDNA 2410066E13 gene	58.2684	52.9588	103.997	127.598	2.0747	1.0529	0.00752309	0.0757576
ENSMUSG00000044367	Slc16a13	solute carrier family 16 (monocarboxylic acid transporters), member 13	220.555	184.966	465.628	378.508	2.07427	1.0526	0.00819449	0.0805814
ENSMUSG00000074682	Zcchc3	zinc finger, CCHC domain containing 3	105.84	89.6749	190.625	216.094	2.07278	1.05157	0.00186528	0.0255218
ENSMUSG00000006705	Pknox1	Pbx/knotted 1 homeobox	293.514	346.143	734.927	595.119	2.0721	1.05109	0.00123803	0.0181863
ENSMUSG00000035181	Heatr5a	HEAT repeat containing 5A	68.0035	140.194	201.171	231.691	2.07192	1.05097	0.00986565	0.0927371
ENSMUSG00000054364	Rhob	ras homolog gene family, member B	821.5	802.17	1676.8	1698.85	2.07166	1.05079	0.000897668	0.013943
ENSMUSG00000034653	Ythdc2	YTH domain containing 2	47.949	101.695	159.072	151.427	2.06785	1.04813	0.00696566	0.0719654
ENSMUSG00000058392	Rrp1b	ribosomal RNA processing 1 homolog B (S. cerevisiae)	385.708	441.92	808.316	903.861	2.06146	1.04367	0.00263128	0.0336088
ENSMUSG00000033909	Usp36	ubiquitin specific peptidase 36	184.939	222.514	424.83	417.927	2.06111	1.04342	0.00140121	0.0201781
ENSMUSG00000047215	Rpl9	ribosomal protein L9	125.332	122.287	241.938	270.117	2.06055	1.04303	0.00752272	0.0757576
ENSMUSG00000026082	Rev1	REV1 homolog (S. cerevisiae)	55.9022	117.83	174.128	184.993	2.06001	1.04265	0.0078523	0.0781173
ENSMUSG00000025656	Arhgef9	CDC42 guanine nucleotide exchange factor (GEF) 9	94.9165	129.019	220.761	242.008	2.05929	1.04215	0.00194757	0.0265109
ENSMUSG00000058558	Rpl5	ribosomal protein L5	132.813	148.324	296.641	283.046	2.05471	1.03893	0.00578351	0.0623699
ENSMUSG00000032883	Acsl3	acyl-CoA synthetase long-chain family member 3	1632.39	1961.74	4190.95	3214.91	2.05342	1.03803	0.00100065	0.0152467
ENSMUSG00000043487	Acot6	acyl-CoA thioesterase 6	86.8495	64.0722	159.213	151.713	2.05281	1.0376	0.00193704	0.0263977
ENSMUSG00000030287	Itpr2	inositol 1,4,5-triphosphate receptor 2	922.466	1323.01	2265.58	2358.36	2.05205	1.03707	0.00139666	0.0201369
ENSMUSG00000034120	Srsf2	serine/arginine-rich splicing factor 2	449.811	654.914	1178.28	1091.58	2.04758	1.03392	0.00168322	0.0234609
ENSMUSG00000006262	Mob1b	MOB kinase activator 1B	597.102	815.866	1461.84	1439.79	2.04642	1.0331	0.00131974	0.01919
ENSMUSG00000071178	Serpina1b	serine (or cysteine) preptidase inhibitor, clade A, member 1B	133814	105280	275263	215117	2.04376	1.03122	0.000622546	0.0103007
ENSMUSG00000030609	Aen	apoptosis enhancing nuclease	291.497	325.541	594.165	669.142	2.04012	1.02866	0.00183893	0.025248
ENSMUSG00000021327	Zkscan3	zinc finger with KRAB and SCAN domains 3	487.596	580.046	1149.19	1036.12	2.03972	1.02837	0.00134789	0.01954
ENSMUSG00000037475	Thoc2	THO complex 2	1011.45	1997.64	2851.81	3299.09	2.03704	1.02648	0.00898856	0.0863277
ENSMUSG00000056167	Cnot10	CCR4-NOT transcription complex, subunit 10	428.541	418.885	884.077	847.079	2.03563	1.02547	0.00121413	0.0178831
ENSMUSG00000024851	Pitpnm1	phosphatidylinositol transfer protein, membrane-associated 1	578.314	678.443	1301.98	1265.16	2.03551	1.02539	0.00188696	0.0257741
ENSMUSG00000022946	Dopey2	dopey family member 2	107.722	124.562	214.303	259.564	2.03279	1.02346	0.00194024	0.0264263
ENSMUSG00000047090	Tmem198b	transmembrane protein 198b	75.3426	68.4415	153.931	138.874	2.02923	1.02093	0.00379622	0.0446056
ENSMUSG00000020287	Mpg	N-methylpurine-DNA glycosylase	114.992	111.086	221.337	238.875	2.02839	1.02034	0.00430104	0.049229
ENSMUSG00000085175	Gm11423	predicted gene 11423	136.994	73.49	233.976	194.222	2.02702	1.01936	0.0092445	0.0882534
ENSMUSG00000042613	Pbxip1	pre B cell leukemia transcription factor interacting protein 1	1472.22	1272.7	2840.81	2742.73	2.02691	1.01928	0.00127991	0.018702
ENSMUSG00000007613	Tgfbr1	transforming growth factor, beta receptor I	670.751	1039.78	1676.12	1795.1	2.02227	1.01598	0.00200716	0.0270904
ENSMUSG00000036980	Taf6	TAF6 RNA polymerase II, TATA box binding protein (TBP)-associated factor	407.625	426.315	887.14	804.736	2.02165	1.01553	0.00149648	0.021297
ENSMUSG00000037933	Bicd2	bicaudal D homolog 2 (Drosophila)	158.239	190.826	356.282	351.371	2.02018	1.01448	0.00185492	0.0254237
ENSMUSG00000022680	Pdxdc1	pyridoxal-dependent decarboxylase domain containing 1	2684.24	3875.17	6747.15	6529.94	2.0171	1.01229	0.00169907	0.0236404
ENSMUSG00000045838	A430105I19Rik	RIKEN cDNA A430105I19 gene	31.6165	51.0369	86.9336	80.2254	2.01544	1.0111	0.00805768	0.079498
ENSMUSG00000051502	Ufsp1	UFM1-specific peptidase 1	104.728	89.5861	212.532	180.104	2.01349	1.0097	0.00777682	0.0775483
ENSMUSG00000066235	Gtdc2	glycosyltransferase-like domain containing 2	65.7179	48.3458	131.765	98.6562	2.01297	1.00933	0.00419352	0.048276
ENSMUSG00000022560	Slc52a2	solute carrier protein 52, member 2	134.351	103.581	258.881	221.675	2.01255	1.00902	0.0020215	0.0272377
ENSMUSG00000022672	Prkdc	protein kinase, DNA activated, catalytic polypeptide	31.5696	58.2132	82.4929	98.7356	2.01151	1.00828	0.00848335	0.0826054
ENSMUSG00000029919	Hpgds	hematopoietic prostaglandin D synthase	103.897	130.578	227.813	245.268	2.01053	1.00758	0.00447424	0.0508216
ENSMUSG00000025047	Pdcd11	programmed cell death 11	151.021	186.063	354.055	325.925	2.01021	1.00735	0.00178711	0.0246928
ENSMUSG00000057895	Zfp105	zinc finger protein 105	72.1237	60.7316	132.226	135.466	2.00771	1.00555	0.00980408	0.0922674
ENSMUSG00000026977	March7	membrane-associated ring finger (C3HC4) 7	556.417	732.348	1343.16	1251.36	2.00618	1.00445	0.00180772	0.0249342
ENSMUSG00000040891	Foxa3	forkhead box A3	2681.17	1432.18	4142.86	4137.53	2.00573	1.00413	0.000931743	0.014334
ENSMUSG00000034940	Synrg	synergin, gamma	804.878	1169.39	1902.08	2069.58	2.00469	1.00338	0.00266636	0.0338808
ENSMUSG00000025616	Usp16	ubiquitin specific peptidase 16	715.822	838.865	1630.15	1495.28	2.0033	1.00238	0.00177902	0.0245952
ENSMUSG00000042807	Hecw2	HECT, C2 and WW domain containing E3 ubiquitin protein ligase 2	136.13	225.943	332.7	394.492	2.00141	1.00102	0.0052298	0.0577819
ENSMUSG00000040565	Btaf1	BTAF1 RNA polymerase II, B-TFIID transcription factor-associated, (Mot1 homolog, S. cerevisiae)	111.081	217.954	310.694	349.925	2.00082	1.00059	0.00880043	0.0851029
ENSMUSG00000015647	Lama5	laminin, alpha 5	811.827	1125.18	1873.33	2015.17	2.00045	1.00033	0.00287471	0.035992

## Sheet: HNF4A bound genes at E18.5 
Ensembl gene ID	Gene name	Distance of HNF4A peak to TSS
ENSMUSG00000000056	Narf	-1500
ENSMUSG00000000154	Slc22a18	2363
ENSMUSG00000000159	Igsf5	1434
ENSMUSG00000000278	Scpep1	-35
ENSMUSG00000000282	Mnt	-3963
ENSMUSG00000000301	Pemt	9526
ENSMUSG00000000303	Cdh1	-6076
ENSMUSG00000000326	Comt	-6819
ENSMUSG00000000561	Wdr77	-276
ENSMUSG00000000605	Clcn4-2	-84
ENSMUSG00000000631	Myo18a	9358
ENSMUSG00000000673	Haao	-320
ENSMUSG00000000673	Haao	-85
ENSMUSG00000000876	Pxmp4	2274
ENSMUSG00000000934	Top1mt	2995
ENSMUSG00000001018	Snapin	-3247
ENSMUSG00000001123	Lgals9	2720
ENSMUSG00000001156	Mxd1	-409
ENSMUSG00000001280	Sp1	-280
ENSMUSG00000001348	Acp5	3862
ENSMUSG00000001552	Jup	40
ENSMUSG00000001663	Gstt1	3393
ENSMUSG00000001670	Tat	-3845
ENSMUSG00000001700	Gramd3	7352
ENSMUSG00000001700	Gramd3	-7492
ENSMUSG00000001750	Tcirg1	-424
ENSMUSG00000001751	Naglu	-6379
ENSMUSG00000001802	Lrp3	-256
ENSMUSG00000002032	Tmem25	-587
ENSMUSG00000002058	Unc119	-3803
ENSMUSG00000002205	Vrk3	-3060
ENSMUSG00000002227	Mov10	26
ENSMUSG00000002289	Angptl4	5832
ENSMUSG00000002342	Tmem161a	-2067
ENSMUSG00000002346	Slc25a42	-6878
ENSMUSG00000002346	Slc25a42	4055
ENSMUSG00000002365	Snx9	1886
ENSMUSG00000002393	Nr2f6	2071
ENSMUSG00000002679	Med6	-92
ENSMUSG00000002769	Gnmt	-6315
ENSMUSG00000002769	Gnmt	-5143
ENSMUSG00000002791	Pdxk-ps	197
ENSMUSG00000002820	Atg4d	549
ENSMUSG00000002897	Il17ra	-8428
ENSMUSG00000002944	Cd36	-8859
ENSMUSG00000002963	Pnkp	-2315
ENSMUSG00000002968	Med25	479
ENSMUSG00000002985	Apoe	-1919
ENSMUSG00000002992	Apoc2	-5369
ENSMUSG00000002992	Apoc2	-4109
ENSMUSG00000003033	Ap1m1	517
ENSMUSG00000003037	Rab8a	8836
ENSMUSG00000003068	Stk11	-1036
ENSMUSG00000003134	Tbc1d8	2213
ENSMUSG00000003200	Sh3gl1	4267
ENSMUSG00000003299	Mrpl4	-1805
ENSMUSG00000003344	Btbd2	-8119
ENSMUSG00000003345	Csnk1g2	3710
ENSMUSG00000003423	Pih1d1	-6203
ENSMUSG00000003435	Supt5h	-2941
ENSMUSG00000003546	Klc4	-30
ENSMUSG00000003617	Cp	5936
ENSMUSG00000003746	Man1a	2166
ENSMUSG00000003847	Nfat5	-27
ENSMUSG00000003992	Ssbp2	213
ENSMUSG00000004040	Stat3	7995
ENSMUSG00000004044	Ptrf	-9105
ENSMUSG00000004054	Map3k11	645
ENSMUSG00000004231	Pax2	-5053
ENSMUSG00000004266	Ptpn6	73
ENSMUSG00000004268	Emg1	-43
ENSMUSG00000004328	Hif3a	4237
ENSMUSG00000004455	Ppp1cc	-2484
ENSMUSG00000004535	Tax1bp1	-8274
ENSMUSG00000004540	Psg17	-6235
ENSMUSG00000004558	Ndrg2	896
ENSMUSG00000004633	Chn2	8054
ENSMUSG00000004633	Chn2	-3840
ENSMUSG00000004798	Ulk2	870
ENSMUSG00000004897	Hdgf	4595
ENSMUSG00000005354	Txn2	5999
ENSMUSG00000005373	Mlxipl	1515
ENSMUSG00000005374	Tbl2	306
ENSMUSG00000005506	Celf1	-8361
ENSMUSG00000005615	Pcyt1a	-220
ENSMUSG00000005677	Nr1i3	6
ENSMUSG00000005681	Apoa2	-68
ENSMUSG00000005681	Apoa2	-1068
ENSMUSG00000005718	Tcfap4	2530
ENSMUSG00000005883	Spo11	5198
ENSMUSG00000005886	Ncoa2	-401
ENSMUSG00000005936	Kctd20	9924
ENSMUSG00000005950	P2rx5	60
ENSMUSG00000006127	Inpp5k	7034
ENSMUSG00000006127	Inpp5k	4541
ENSMUSG00000006218	Fam131c	-5011
ENSMUSG00000006304	Arpc2	9357
ENSMUSG00000006307	Wbp7	-434
ENSMUSG00000006315	Tmem147	-209
ENSMUSG00000006390	Elovl1	4411
ENSMUSG00000006395	Hyi	-2467
ENSMUSG00000006395	Hyi	-2992
ENSMUSG00000006456	Rbm14	-9162
ENSMUSG00000006476	Nelf	-2798
ENSMUSG00000006522	Itih3	-6925
ENSMUSG00000006522	Itih3	144
ENSMUSG00000006526	Tmem110	4721
ENSMUSG00000006526	Tmem110	3728
ENSMUSG00000006529	Itih1	-1664
ENSMUSG00000006538	Ihh	1808
ENSMUSG00000006567	Atp7b	132
ENSMUSG00000006589	Aprt	2129
ENSMUSG00000006638	Abhd1	-31
ENSMUSG00000006732	Mettl1	-4935
ENSMUSG00000006777	Krt23	3763
ENSMUSG00000007812	Zfp655	-969
ENSMUSG00000007812	Zfp655	-8651
ENSMUSG00000007817	Zmiz1	-8008
ENSMUSG00000008305	Tle1	1982
ENSMUSG00000008348	Ubc	-3209
ENSMUSG00000008384	Sertad1	-5430
ENSMUSG00000008393	Carhsp1	-128
ENSMUSG00000008540	Mgst1	-164
ENSMUSG00000009030	Pdcl	3594
ENSMUSG00000009090	Ap1b1	68
ENSMUSG00000009145	Dqx1	208
ENSMUSG00000009281	Rarres2	-89
ENSMUSG00000009281	Rarres2	6006
ENSMUSG00000009291	Pttg1ip	263
ENSMUSG00000009566	Fpgs	-570
ENSMUSG00000009566	Fpgs	-325
ENSMUSG00000009614	Sardh	-123
ENSMUSG00000009646	Pla2g12b	-71
ENSMUSG00000009681	Bcr	-7885
ENSMUSG00000009828	Ick	8688
ENSMUSG00000010025	Aldh3a2	-1685
ENSMUSG00000010025	Aldh3a2	711
ENSMUSG00000010067	Rassf1	-937
ENSMUSG00000010122	Slc47a1	-562
ENSMUSG00000010122	Slc47a1	146
ENSMUSG00000010601	Apol7a	2694
ENSMUSG00000010607	Pigyl	-6436
ENSMUSG00000010721	Lmbr1	-128
ENSMUSG00000010841	1700006E09Rik	158
ENSMUSG00000011831	Evi5	-5782
ENSMUSG00000012123	Aim1l	1562
ENSMUSG00000012443	Kif11	-175
ENSMUSG00000012535	Tnpo3	62
ENSMUSG00000012848	Rps5	-94
ENSMUSG00000013160	Atp6v0d1	-421
ENSMUSG00000013997	Nit1	768
ENSMUSG00000014294	Ndufa2	-6
ENSMUSG00000014372	Cyp2d10	-35
ENSMUSG00000014496	Ankrd28	461
ENSMUSG00000014504	Srp19	-2201
ENSMUSG00000014550	Zfyve20	-4631
ENSMUSG00000014599	Csf1	-5688
ENSMUSG00000014686	Ceacam16	-4068
ENSMUSG00000014763	Fam120b	-6682
ENSMUSG00000014791	Elmo3	-46
ENSMUSG00000014850	Msh3	-533
ENSMUSG00000015095	Fbxw5	-462
ENSMUSG00000015112	Slc25a13	-2788
ENSMUSG00000015165	Hnrnpl	-5421
ENSMUSG00000015290	Ubl4	-42
ENSMUSG00000015357	Clpx	-4044
ENSMUSG00000015478	Rnf5	-250
ENSMUSG00000015647	Lama5	-1920
ENSMUSG00000015653	Steap2	83
ENSMUSG00000015837	Sqstm1	9074
ENSMUSG00000015846	Rxra	3324
ENSMUSG00000015846	Rxra	-4697
ENSMUSG00000015869	Prpsap1	9819
ENSMUSG00000015970	Chdh	1254
ENSMUSG00000016024	Lbp	-3529
ENSMUSG00000016477	E2f3	-683
ENSMUSG00000016503	Gtf3a	108
ENSMUSG00000016520	Lnx2	1144
ENSMUSG00000016520	Lnx2	9326
ENSMUSG00000016619	Nup50	5372
ENSMUSG00000016942	Tmprss6	74
ENSMUSG00000017009	Sdc4	5912
ENSMUSG00000017144	Rnd3	7554
ENSMUSG00000017210	Med24	3433
ENSMUSG00000017344	Vtn	1929
ENSMUSG00000017386	Traf4	704
ENSMUSG00000017453	Pipox	137
ENSMUSG00000017615	Tnfaip1	652
ENSMUSG00000017664	Slc35c2	3354
ENSMUSG00000017679	Ttpal	-8276
ENSMUSG00000017686	Rhot1	-6541
ENSMUSG00000017868	Sgk2	4968
ENSMUSG00000017969	Ptgis	7671
ENSMUSG00000018042	Cyb5r3	9347
ENSMUSG00000018126	Baiap2l2	1955
ENSMUSG00000018166	Erbb3	1809
ENSMUSG00000018169	Mfng	-7586
ENSMUSG00000018339	Gpx3	3610
ENSMUSG00000018401	Mtmr4	667
ENSMUSG00000018474	Chd3	-8534
ENSMUSG00000018476	Kdm6b	-3922
ENSMUSG00000018476	Kdm6b	2355
ENSMUSG00000018476	Kdm6b	3828
ENSMUSG00000018509	Cenpv	678
ENSMUSG00000018585	Atox1	2600
ENSMUSG00000018593	Sparc	-8601
ENSMUSG00000018659	Pnpo	6012
ENSMUSG00000018736	Ndel1	6668
ENSMUSG00000018796	Acsl1	-457
ENSMUSG00000018861	Fdxr	-492
ENSMUSG00000018899	Irf1	-7863
ENSMUSG00000018899	Irf1	-8089
ENSMUSG00000019082	Slc25a22	724
ENSMUSG00000019122	Ccl9	32
ENSMUSG00000019232	Agxt2l1	131
ENSMUSG00000019235	Rps6kl1	-323
ENSMUSG00000019278	Dpep1	-4677
ENSMUSG00000019302	Atp6v0a1	-169
ENSMUSG00000019312	Grb7	241
ENSMUSG00000019461	Plscr3	69
ENSMUSG00000019478	Rab4a	7342
ENSMUSG00000019478	Rab4a	-6345
ENSMUSG00000019518	Ap4m1	-771
ENSMUSG00000019564	Arid3a	9346
ENSMUSG00000019577	Pdk4	-173
ENSMUSG00000019715	Gle1	9415
ENSMUSG00000019718	2810055F11Rik	719
ENSMUSG00000019726	Lyst	-1127
ENSMUSG00000019762	Iyd	-82
ENSMUSG00000019796	Lrp11	-300
ENSMUSG00000019813	Cep57l1	-81
ENSMUSG00000019838	Slc16a10	-9839
ENSMUSG00000019850	Tnfaip3	6173
ENSMUSG00000019851	Perp	-375
ENSMUSG00000019863	Qrsl1	5540
ENSMUSG00000019878	Hsf2	2195
ENSMUSG00000019920	Lims1	5483
ENSMUSG00000019933	2310015B20Rik	-9141
ENSMUSG00000020087	Tysnd1	1557
ENSMUSG00000020091	Eif4ebp2	1091
ENSMUSG00000020109	Dnajb12	1493
ENSMUSG00000020122	Egfr	-9723
ENSMUSG00000020142	Slc1a4	-537
ENSMUSG00000020150	Gamt	846
ENSMUSG00000020171	Yeats4	160
ENSMUSG00000020175	Rab36	-87
ENSMUSG00000020219	Timm13	-46
ENSMUSG00000020257	Wdr82	811
ENSMUSG00000020258	Glyctk	-31
ENSMUSG00000020261	Slc36a1	4240
ENSMUSG00000020265	Sumo3	7628
ENSMUSG00000020267	Hint1	870
ENSMUSG00000020268	Lyrm7	322
ENSMUSG00000020272	Stk10	-322
ENSMUSG00000020277	Pfkl	767
ENSMUSG00000020309	Chac2	127
ENSMUSG00000020317	Theg	-8529
ENSMUSG00000020334	Slc22a4	-691
ENSMUSG00000020346	Mgat1	1291
ENSMUSG00000020359	Agxt2l2	-173
ENSMUSG00000020393	Kremen1	-8689
ENSMUSG00000020412	Ascc2	-8
ENSMUSG00000020422	Tns3	469
ENSMUSG00000020429	Igfbp1	-192
ENSMUSG00000020429	Igfbp1	-4850
ENSMUSG00000020439	Smtn	1339
ENSMUSG00000020476	Dbnl	-6114
ENSMUSG00000020530	Ggnbp2	-597
ENSMUSG00000020530	Ggnbp2	-420
ENSMUSG00000020530	Ggnbp2	5251
ENSMUSG00000020538	Srebf1	-310
ENSMUSG00000020609	Apob	931
ENSMUSG00000020609	Apob	-97
ENSMUSG00000020644	Id2	-1262
ENSMUSG00000020653	Klf11	9980
ENSMUSG00000020661	Dnmt3a	2576
ENSMUSG00000020698	Cct6b	104
ENSMUSG00000020709	Adap2	5056
ENSMUSG00000020715	Ern1	-5732
ENSMUSG00000020766	Galk1	1060
ENSMUSG00000020766	Galk1	6806
ENSMUSG00000020766	Galk1	7355
ENSMUSG00000020778	2310004N24Rik	-3361
ENSMUSG00000020801	Med31	-83
ENSMUSG00000020806	Rhbdf2	2999
ENSMUSG00000020817	Rabep1	-1591
ENSMUSG00000020850	Prpf8	8146
ENSMUSG00000020857	Nme2	3594
ENSMUSG00000020859	Spag9	1286
ENSMUSG00000020872	Tac4	-9410
ENSMUSG00000020877	Scrn2	58
ENSMUSG00000020884	Asgr1	303
ENSMUSG00000020900	Myh10	-2028
ENSMUSG00000020919	Stat5b	-232
ENSMUSG00000020919	Stat5b	8427
ENSMUSG00000020936	Nmt1	57
ENSMUSG00000020986	Sec23a	585
ENSMUSG00000020990	Cdkl1	-103
ENSMUSG00000021000	Ctage5	1214
ENSMUSG00000021018	Polr2h	-142
ENSMUSG00000021036	Sptlc2	-5252
ENSMUSG00000021069	Pygl	-2409
ENSMUSG00000021097	Clmn	1190
ENSMUSG00000021135	Slc10a1	-8057
ENSMUSG00000021140	Pcnx	-3163
ENSMUSG00000021224	Numb	-3388
ENSMUSG00000021252	0610007P14Rik	-24
ENSMUSG00000021281	Tnfaip2	-1499
ENSMUSG00000021286	Zfyve21	4049
ENSMUSG00000021286	Zfyve21	1468
ENSMUSG00000021360	Gcnt2	-4728
ENSMUSG00000021361	Tmem14c	765
ENSMUSG00000021364	Elovl2	8839
ENSMUSG00000021367	Edn1	-2802
ENSMUSG00000021385	Ippk	-269
ENSMUSG00000021486	Prelid1	638
ENSMUSG00000021490	Slc34a1	-7877
ENSMUSG00000021490	Slc34a1	-8907
ENSMUSG00000021492	F12	-169
ENSMUSG00000021590	Spata9	9126
ENSMUSG00000021606	Ndufs6	-42
ENSMUSG00000021620	Acot12	-69
ENSMUSG00000021620	Acot12	-608
ENSMUSG00000021638	Ocln	8150
ENSMUSG00000021665	Hexb	-7305
ENSMUSG00000021665	Hexb	7728
ENSMUSG00000021669	Col4a3bp	1010
ENSMUSG00000021703	Serinc5	-1279
ENSMUSG00000021751	Acox2	-109
ENSMUSG00000021759	Ppap2a	4823
ENSMUSG00000021792	5730469M10Rik	5633
ENSMUSG00000021806	Nid2	23
ENSMUSG00000021840	Mapk1ip1l	-1879
ENSMUSG00000021898	Asb14	-7196
ENSMUSG00000021905	Dph3	-7508
ENSMUSG00000021910	Nisch	2955
ENSMUSG00000022039	Adam2	-5143
ENSMUSG00000022094	Slc39a14	-2141
ENSMUSG00000022098	Bmp1	4364
ENSMUSG00000022136	Dnajc3	-3110
ENSMUSG00000022149	C9	523
ENSMUSG00000022149	C9	4
ENSMUSG00000022194	Pabpn1	1238
ENSMUSG00000022216	Psme1	-211
ENSMUSG00000022219	Cideb	-17
ENSMUSG00000022236	Ropn1l	-2992
ENSMUSG00000022244	Amacr	4152
ENSMUSG00000022263	Trio	5993
ENSMUSG00000022280	Rnf19a	568
ENSMUSG00000022335	Zfat	1094
ENSMUSG00000022338	Eny2	18
ENSMUSG00000022365	Derl1	2800
ENSMUSG00000022383	Ppara	7805
ENSMUSG00000022383	Ppara	695
ENSMUSG00000022383	Ppara	-2068
ENSMUSG00000022445	Cyp2d26	-1952
ENSMUSG00000022445	Cyp2d26	-179
ENSMUSG00000022450	Ndufa6	-7225
ENSMUSG00000022476	Polr3h	-1783
ENSMUSG00000022477	Aco2	5
ENSMUSG00000022508	Bcl6	7223
ENSMUSG00000022512	Cldn1	3549
ENSMUSG00000022518	4930562C15Rik	-5991
ENSMUSG00000022529	Zfp263	3637
ENSMUSG00000022540	Rogdi	3436
ENSMUSG00000022546	Gpt	-552
ENSMUSG00000022546	Gpt	-6256
ENSMUSG00000022574	Naprt1	-79
ENSMUSG00000022575	Gsdmd	6000
ENSMUSG00000022614	Lmf2	329
ENSMUSG00000022629	Kif21a	-106
ENSMUSG00000022659	Gcet2	-1583
ENSMUSG00000022671	Mzt2	37
ENSMUSG00000022721	Trmt2a	-6
ENSMUSG00000022742	Cpox	-6206
ENSMUSG00000022742	Cpox	-7641
ENSMUSG00000022809	Nr1i2	-15
ENSMUSG00000022821	Hgd	4565
ENSMUSG00000022821	Hgd	41
ENSMUSG00000022831	Hcls1	8757
ENSMUSG00000022838	Eaf2	263
ENSMUSG00000022844	Pdia5	-78
ENSMUSG00000022865	Cxadr	6531
ENSMUSG00000022868	Ahsg	-116
ENSMUSG00000022868	Ahsg	-7894
ENSMUSG00000022871	Fetub	2220
ENSMUSG00000022875	Kng1	391
ENSMUSG00000022875	Kng1	-1505
ENSMUSG00000022877	Hrg	43
ENSMUSG00000022878	Adipoq	-1886
ENSMUSG00000022887	Masp1	9133
ENSMUSG00000022906	Parp9	-5648
ENSMUSG00000022945	Chaf1b	8
ENSMUSG00000022967	Ifnar1	-322
ENSMUSG00000022974	Gcfc1	-46
ENSMUSG00000022982	Sod1	1220
ENSMUSG00000022983	Scaf4	806
ENSMUSG00000022983	Scaf4	3411
ENSMUSG00000023010	Tmbim6	965
ENSMUSG00000023019	Gpd1	1167
ENSMUSG00000023022	Lima1	7521
ENSMUSG00000023043	Krt18	-1476
ENSMUSG00000023043	Krt18	-9972
ENSMUSG00000023087	Ccrn4l	9298
ENSMUSG00000023259	Slc26a6	1397
ENSMUSG00000023262	Acy1	-924
ENSMUSG00000023262	Acy1	57
ENSMUSG00000023403	Stk31	2943
ENSMUSG00000023829	Slc22a1	4742
ENSMUSG00000023845	Lnpep	-624
ENSMUSG00000023861	Brp44l	-4372
ENSMUSG00000023947	Nfkbie	104
ENSMUSG00000023951	Vegfa	1478
ENSMUSG00000023971	Rrp36	-114
ENSMUSG00000024007	Ppil1	807
ENSMUSG00000024014	Pim1	-2039
ENSMUSG00000024014	Pim1	-2437
ENSMUSG00000024019	Ftsjd2	4486
ENSMUSG00000024029	Tff3	11
ENSMUSG00000024042	Sik1	-6422
ENSMUSG00000024068	Spast	-7452
ENSMUSG00000024073	Birc6	135
ENSMUSG00000024077	Strn	1390
ENSMUSG00000024122	Pdpk1	-1057
ENSMUSG00000024150	Mcfd2	185
ENSMUSG00000024160	Spsb3	83
ENSMUSG00000024164	C3	-5077
ENSMUSG00000024173	Tpsab1	3872
ENSMUSG00000024217	Snrpc	-409
ENSMUSG00000024220	Zfp523	8230
ENSMUSG00000024228	Nudt12	11
ENSMUSG00000024235	Map3k8	129
ENSMUSG00000024273	2700062C07Rik	-3932
ENSMUSG00000024304	Cdh2	-748
ENSMUSG00000024331	Dsc2	-253
ENSMUSG00000024354	Slc23a1	-41
ENSMUSG00000024386	Proc	-24
ENSMUSG00000024395	Lims2	3155
ENSMUSG00000024498	Tcerg1	-284
ENSMUSG00000024503	Spink3	4998
ENSMUSG00000024646	Cyb5	3543
ENSMUSG00000024646	Cyb5	26
ENSMUSG00000024665	Fads2	-219
ENSMUSG00000024778	Fas	-368
ENSMUSG00000024782	Ak3	1715
ENSMUSG00000024790	Sac3d1	-3343
ENSMUSG00000024815	Trpd52l3	7248
ENSMUSG00000024833	Pola2	6579
ENSMUSG00000024863	Mbl2	-3255
ENSMUSG00000024866	Acy3	-176
ENSMUSG00000024885	Aldh3b1	-36
ENSMUSG00000024896	Minpp1	-4028
ENSMUSG00000024900	Cpt1a	3362
ENSMUSG00000024900	Cpt1a	-2996
ENSMUSG00000024926	Kat5	-2434
ENSMUSG00000024981	Acsl5	-1466
ENSMUSG00000024985	Tcf7l2	2574
ENSMUSG00000024992	Pde6c	1484
ENSMUSG00000025001	Hells	-284
ENSMUSG00000025036	Sfxn2	2114
ENSMUSG00000025066	6330577E15Rik	-820
ENSMUSG00000025078	Nhlrc2	215
ENSMUSG00000025085	Ablim1	403
ENSMUSG00000025092	Hspa12a	9994
ENSMUSG00000025127	Gcgr	-1744
ENSMUSG00000025130	P4hb	-3612
ENSMUSG00000025137	Pcyt2	806
ENSMUSG00000025162	Csnk1d	172
ENSMUSG00000025165	Sectm1a	-5314
ENSMUSG00000025184	D19Ertd386e	-8238
ENSMUSG00000025194	Abcc2	4241
ENSMUSG00000025195	Dnmbp	-6609
ENSMUSG00000025197	Cyp2c44	7576
ENSMUSG00000025198	Erlin1	5843
ENSMUSG00000025199	Chuk	-3092
ENSMUSG00000025201	Gm13540	-5668
ENSMUSG00000025203	Scd2	2272
ENSMUSG00000025207	Sema4g	-225
ENSMUSG00000025226	Fbxl15	817
ENSMUSG00000025317	Car5a	-130
ENSMUSG00000025347	Mettl7b	-4169
ENSMUSG00000025350	Rdh5	3638
ENSMUSG00000025393	Atp5b	-261
ENSMUSG00000025396	Hsd17b6	-2984
ENSMUSG00000025396	Hsd17b6	3849
ENSMUSG00000025405	Inhbc	2157
ENSMUSG00000025408	Ddit3	-170
ENSMUSG00000025429	Pstpip2	243
ENSMUSG00000025453	Nnt	8584
ENSMUSG00000025479	Cyp2e1	-7017
ENSMUSG00000025487	Psmd13	-1315
ENSMUSG00000025488	Cox8b	-8223
ENSMUSG00000025488	Cox8b	-5455
ENSMUSG00000025504	Eps8l2	5067
ENSMUSG00000025574	Tk1	-8263
ENSMUSG00000025578	Cbx8	-5913
ENSMUSG00000025578	Cbx8	-4336
ENSMUSG00000025584	Pde8a	-610
ENSMUSG00000025726	Slc28a1	-78
ENSMUSG00000025731	0610011F06Rik	925
ENSMUSG00000025735	Rhbdl1	-2585
ENSMUSG00000025745	Hadha	3785
ENSMUSG00000025762	Larp1b	-3771
ENSMUSG00000025781	Atp5c1	323
ENSMUSG00000025783	4930412O13Rik	-1486
ENSMUSG00000025791	Pgm2	27
ENSMUSG00000025793	Hgs	4580
ENSMUSG00000025810	Nrp1	-2025
ENSMUSG00000025815	Dhtkd1	-216
ENSMUSG00000025815	Dhtkd1	6012
ENSMUSG00000025854	Fam20c	3794
ENSMUSG00000025871	4833439L19Rik	-959
ENSMUSG00000025885	Myo5b	1616
ENSMUSG00000025933	Tmem14a	240
ENSMUSG00000025935	Tram1	-7
ENSMUSG00000025980	Hspd1	-209
ENSMUSG00000026003	Acadl	554
ENSMUSG00000026027	Stradb	152
ENSMUSG00000026170	Cyp27a1	-469
ENSMUSG00000026176	Ctdsp1	1358
ENSMUSG00000026188	Tmem169	9701
ENSMUSG00000026196	Bard1	107
ENSMUSG00000026205	Slc23a3	8933
ENSMUSG00000026224	4933407L21Rik	-3105
ENSMUSG00000026227	2810459M11Rik	-5513
ENSMUSG00000026229	Psmd1	-7933
ENSMUSG00000026259	Ngef	-146
ENSMUSG00000026259	Ngef	62
ENSMUSG00000026269	Rnpepl1	9586
ENSMUSG00000026272	Agxt	-2261
ENSMUSG00000026295	Spp2	-18
ENSMUSG00000026311	Asb1	-163
ENSMUSG00000026333	Gin1	-49
ENSMUSG00000026348	Acmsd	3271
ENSMUSG00000026368	F13b	-107
ENSMUSG00000026368	F13b	-304
ENSMUSG00000026389	Steap3	2268
ENSMUSG00000026393	Nek7	424
ENSMUSG00000026398	Nr5a2	-112
ENSMUSG00000026435	Slc45a3	-16
ENSMUSG00000026439	Rbbp5	8
ENSMUSG00000026489	Adck3	4316
ENSMUSG00000026491	Ahctf1	-2336
ENSMUSG00000026617	Bpnt1	218
ENSMUSG00000026617	Bpnt1	-23
ENSMUSG00000026623	Lpgat1	1413
ENSMUSG00000026638	Irf6	3405
ENSMUSG00000026639	Lamb3	9792
ENSMUSG00000026640	Plxna2	-9311
ENSMUSG00000026655	Fam107b	9309
ENSMUSG00000026659	Dusp12	228
ENSMUSG00000026659	Dusp12	2223
ENSMUSG00000026708	Cenpl	5575
ENSMUSG00000026715	Serpinc1	8807
ENSMUSG00000026715	Serpinc1	2265
ENSMUSG00000026721	Rabgap1l	-287
ENSMUSG00000026749	Nek6	-8720
ENSMUSG00000026767	Fam188a	-171
ENSMUSG00000026788	Zbtb43	522
ENSMUSG00000026811	St6galnac6	9295
ENSMUSG00000026825	Dnm1	-7513
ENSMUSG00000026840	Lamc3	-338
ENSMUSG00000026842	Abl1	-233
ENSMUSG00000026848	Tor1b	5998
ENSMUSG00000026853	Crat	471
ENSMUSG00000026866	Kynu	889
ENSMUSG00000026870	D730039F16Rik	643
ENSMUSG00000026922	Agpat2	1101
ENSMUSG00000026922	Agpat2	3507
ENSMUSG00000026924	Sec16a	9799
ENSMUSG00000026932	Nacc2	4100
ENSMUSG00000026943	Lcn12	8445
ENSMUSG00000026970	Rbms1	1285
ENSMUSG00000026981	Il1rn	-1172
ENSMUSG00000026991	Pkp4	1172
ENSMUSG00000027035	Lass6	-872
ENSMUSG00000027068	Dhrs9	5992
ENSMUSG00000027078	Ube2l6	2531
ENSMUSG00000027091	Zc3h15	4731
ENSMUSG00000027187	Cat	-249
ENSMUSG00000027222	Pex16	681
ENSMUSG00000027227	Sord	7271
ENSMUSG00000027227	Sord	948
ENSMUSG00000027249	F2	-759
ENSMUSG00000027249	F2	-107
ENSMUSG00000027255	Arfgap2	81
ENSMUSG00000027261	Hao1	-192
ENSMUSG00000027296	Itpka	2443
ENSMUSG00000027344	Fsip1	282
ENSMUSG00000027366	2010106G01Rik	1214
ENSMUSG00000027404	Snrpb	7446
ENSMUSG00000027456	Sdcbp2	-9295
ENSMUSG00000027495	2010011I20Rik	5349
ENSMUSG00000027513	Pck1	-290
ENSMUSG00000027530	Fabp12	-1609
ENSMUSG00000027569	1600027N09Rik	-4653
ENSMUSG00000027580	BC006779	-7457
ENSMUSG00000027580	BC006779	-3115
ENSMUSG00000027599	Armc1	-6084
ENSMUSG00000027606	Dnajc5b	3589
ENSMUSG00000027656	Wisp2	3117
ENSMUSG00000027670	4833422F24Rik	-4639
ENSMUSG00000027679	Dnajc19	-25
ENSMUSG00000027679	Dnajc19	4899
ENSMUSG00000027706	Sec62	9494
ENSMUSG00000027710	Acad9	-66
ENSMUSG00000027787	Nmd3	603
ENSMUSG00000027810	Eif2a	2
ENSMUSG00000027878	Notch2	3658
ENSMUSG00000027882	Stxbp3a	9868
ENSMUSG00000027883	Gpsm2	7146
ENSMUSG00000027890	Gstm4	60
ENSMUSG00000027908	Tchhl1	1051
ENSMUSG00000027938	Creb3l4	2154
ENSMUSG00000027940	Tpm3	9121
ENSMUSG00000027954	Efna1	-294
ENSMUSG00000027954	Efna1	2853
ENSMUSG00000027956	Tmem144	-7154
ENSMUSG00000027957	Slc35a3	452
ENSMUSG00000027984	Hadh	7763
ENSMUSG00000027984	Hadh	8063
ENSMUSG00000028001	Fga	-5561
ENSMUSG00000028008	Accn5	5488
ENSMUSG00000028035	Dnajb4	8951
ENSMUSG00000028057	Rit1	2441
ENSMUSG00000028121	Bcar3	8994
ENSMUSG00000028128	F3	-501
ENSMUSG00000028150	Rorc	88
ENSMUSG00000028179	Cth	30
ENSMUSG00000028221	Tmem55a	1438
ENSMUSG00000028238	Atp6v0d2	-3244
ENSMUSG00000028240	Cyp7a1	-149
ENSMUSG00000028249	Sdcbp	7574
ENSMUSG00000028307	Aldob	-3921
ENSMUSG00000028356	Ambp	-2531
ENSMUSG00000028382	Rod1	-9147
ENSMUSG00000028382	Rod1	-452
ENSMUSG00000028393	Alad	2902
ENSMUSG00000028407	2010003O02Rik	-797
ENSMUSG00000028409	Smu1	46
ENSMUSG00000028411	Aptx	2793
ENSMUSG00000028413	B4galt1	1379
ENSMUSG00000028443	Nudt2	3620
ENSMUSG00000028480	Glipr2	2369
ENSMUSG00000028494	Plin2	-1043
ENSMUSG00000028521	Slc35d1	-168
ENSMUSG00000028530	Jak1	-45
ENSMUSG00000028549	Itgb3bp	-379
ENSMUSG00000028557	Rnf11	52
ENSMUSG00000028572	Hook1	-400
ENSMUSG00000028607	Cpt2	1462
ENSMUSG00000028614	Tmem48	-30
ENSMUSG00000028654	Mycl1	867
ENSMUSG00000028680	Plk3	-2100
ENSMUSG00000028709	Mobkl2c	6
ENSMUSG00000028712	Cyp4a31	-8106
ENSMUSG00000028744	Pqlc2	8686
ENSMUSG00000028756	Pink1	-294
ENSMUSG00000028756	Pink1	-113
ENSMUSG00000028790	Khdrbs1	-178
ENSMUSG00000028792	Ak2	9011
ENSMUSG00000028792	Ak2	-8091
ENSMUSG00000028800	Hdac1	-117
ENSMUSG00000028811	Yars	2080
ENSMUSG00000028822	Tmem50a	-3529
ENSMUSG00000028885	Smpdl3b	-3281
ENSMUSG00000028919	Arhgef19	1081
ENSMUSG00000028953	Abcf2	-24
ENSMUSG00000028962	Slc4a2	-104
ENSMUSG00000028964	Park7	4930
ENSMUSG00000028965	Tnfrsf9	100
ENSMUSG00000028967	Errfi1	120
ENSMUSG00000028980	H6pd	1656
ENSMUSG00000029032	Arhgef16	7208
ENSMUSG00000029047	Pex10	8889
ENSMUSG00000029063	Nadk	6836
ENSMUSG00000029102	Hgfac	1736
ENSMUSG00000029144	Gtf3c2	235
ENSMUSG00000029173	Sepsecs	109
ENSMUSG00000029173	Sepsecs	410
ENSMUSG00000029176	Anapc4	-5721
ENSMUSG00000029177	Cenpa	-257
ENSMUSG00000029178	Klf3	3035
ENSMUSG00000029190	D5Ertd579e	-5001
ENSMUSG00000029195	Klb	8654
ENSMUSG00000029201	Ugdh	115
ENSMUSG00000029246	Ppat	-139
ENSMUSG00000029269	Sult1b1	1887
ENSMUSG00000029269	Sult1b1	2070
ENSMUSG00000029338	Antxr2	585
ENSMUSG00000029364	Wsb2	8957
ENSMUSG00000029407	Uso1	-38
ENSMUSG00000029416	Slc15a4	-5007
ENSMUSG00000029426	Scarb2	9425
ENSMUSG00000029445	Hpd	-8886
ENSMUSG00000029445	Hpd	1001
ENSMUSG00000029455	Aldh2	1940
ENSMUSG00000029462	Vps29	306
ENSMUSG00000029490	Mfsd7a	-5358
ENSMUSG00000029556	Hnf1a	-49
ENSMUSG00000029559	2210016L21Rik	9506
ENSMUSG00000029580	Actb	-5733
ENSMUSG00000029580	Actb	-3237
ENSMUSG00000029596	Sdsl	1033
ENSMUSG00000029646	Cdx2	7531
ENSMUSG00000029655	N4bp2l2	-117
ENSMUSG00000029675	Eln	3098
ENSMUSG00000029722	Agfg2	9667
ENSMUSG00000029735	Tpk1	-177
ENSMUSG00000029735	Tpk1	372
ENSMUSG00000029735	Tpk1	545
ENSMUSG00000029752	Asns	2193
ENSMUSG00000029804	Herc3	477
ENSMUSG00000029821	Dfna5	2014
ENSMUSG00000029843	Slc13a4	4515
ENSMUSG00000029859	Epha1	305
ENSMUSG00000029998	Pcyox1	274
ENSMUSG00000030087	Klf15	4630
ENSMUSG00000030087	Klf15	2644
ENSMUSG00000030087	Klf15	1078
ENSMUSG00000030089	Slc41a3	193
ENSMUSG00000030096	Slc6a6	6955
ENSMUSG00000030096	Slc6a6	6712
ENSMUSG00000030108	Slc6a13	4555
ENSMUSG00000030109	Slc6a12	3577
ENSMUSG00000030160	D630042F21Rik	-2160
ENSMUSG00000030201	Lrp6	2261
ENSMUSG00000030235	Slco1c1	-8960
ENSMUSG00000030244	Gys2	-11
ENSMUSG00000030313	Dennd5b	980
ENSMUSG00000030319	Cand2	-3405
ENSMUSG00000030339	Ltbr	4253
ENSMUSG00000030382	Slc27a5	2055
ENSMUSG00000030446	Zfp273	61
ENSMUSG00000030499	Kctd15	-4444
ENSMUSG00000030530	Furin	4682
ENSMUSG00000030538	Cib1	757
ENSMUSG00000030541	Idh2	-5945
ENSMUSG00000030541	Idh2	-3756
ENSMUSG00000030544	Mesp1	3793
ENSMUSG00000030609	Aen	1937
ENSMUSG00000030630	Fah	14
ENSMUSG00000030630	Fah	2143
ENSMUSG00000030674	Qprt	574
ENSMUSG00000030678	Maz	-593
ENSMUSG00000030748	Il4ra	-170
ENSMUSG00000030761	Myo7a	301
ENSMUSG00000030762	Aqp8	3943
ENSMUSG00000030762	Aqp8	3
ENSMUSG00000030771	Micalcl	6162
ENSMUSG00000030796	Tead2	-1885
ENSMUSG00000030805	Stx4a	-9399
ENSMUSG00000030811	Fbxl19	-823
ENSMUSG00000030834	Abcc6	-59
ENSMUSG00000030834	Abcc6	1493
ENSMUSG00000030846	Tial1	1825
ENSMUSG00000030909	Anks4b	-133
ENSMUSG00000030965	Fam175b	245
ENSMUSG00000030967	Zranb1	-5691
ENSMUSG00000031016	Wee1	-761
ENSMUSG00000031077	Fadd	675
ENSMUSG00000031173	Otc	-123
ENSMUSG00000031434	Morc4	-5604
ENSMUSG00000031445	Proz	38
ENSMUSG00000031445	Proz	-3466
ENSMUSG00000031482	Slc25a15	7668
ENSMUSG00000031503	Col4a2	-7016
ENSMUSG00000031511	Arhgef7	7845
ENSMUSG00000031511	Arhgef7	975
ENSMUSG00000031520	Vegfc	672
ENSMUSG00000031533	Mrps31	3065
ENSMUSG00000031537	Ikbkb	5337
ENSMUSG00000031570	Ppapdc1b	-9297
ENSMUSG00000031591	Asah1	168
ENSMUSG00000031657	Heatr3	93
ENSMUSG00000031665	Sall1	2834
ENSMUSG00000031672	Got2	687
ENSMUSG00000031672	Got2	2397
ENSMUSG00000031714	Gab1	399
ENSMUSG00000031723	Txnl4b	-136
ENSMUSG00000031751	Amfr	-576
ENSMUSG00000031811	Fbxo31	-1702
ENSMUSG00000031813	Fam125a	106
ENSMUSG00000031822	Gse1	6809
ENSMUSG00000031822	Gse1	2811
ENSMUSG00000031833	Mast3	-811
ENSMUSG00000031844	Hsd17b2	-6072
ENSMUSG00000031848	Lsm4	6912
ENSMUSG00000031925	Maml2	-1723
ENSMUSG00000031974	Abcb10	9413
ENSMUSG00000031980	Agt	-2193
ENSMUSG00000032012	Pvrl1	9666
ENSMUSG00000032012	Pvrl1	-1671
ENSMUSG00000032041	Tirap	715
ENSMUSG00000032083	Apoa1	-130
ENSMUSG00000032085	Tagln	3316
ENSMUSG00000032092	Mpzl2	-46
ENSMUSG00000032114	Slc37a4	4214
ENSMUSG00000032120	C2cd2l	1674
ENSMUSG00000032175	Tyk2	-3857
ENSMUSG00000032194	Kank2	-8008
ENSMUSG00000032204	Aqp9	-7295
ENSMUSG00000032244	Fem1b	-3386
ENSMUSG00000032245	Cln6	-9876
ENSMUSG00000032280	Tle3	6814
ENSMUSG00000032293	Ireb2	-2976
ENSMUSG00000032309	Fbxo22	2919
ENSMUSG00000032309	Fbxo22	263
ENSMUSG00000032312	Csk	-2542
ENSMUSG00000032314	Etfa	436
ENSMUSG00000032315	Cyp1a1	-877
ENSMUSG00000032376	Usp3	-152
ENSMUSG00000032392	Parp16	1319
ENSMUSG00000032402	Smad3	-2520
ENSMUSG00000032402	Smad3	3961
ENSMUSG00000032417	Rwdd2a	1127
ENSMUSG00000032454	Rbp2	-100
ENSMUSG00000032497	Lrrfip2	5418
ENSMUSG00000032513	Gorasp1	3593
ENSMUSG00000032531	Amotl2	9971
ENSMUSG00000032554	Trf	-3863
ENSMUSG00000032601	Prkar2a	-1835
ENSMUSG00000032609	Klhdc8b	-355
ENSMUSG00000032612	Usp4	119
ENSMUSG00000032612	Usp4	-3182
ENSMUSG00000032671	A930018P22Rik	-9044
ENSMUSG00000032782	Cntrob	147
ENSMUSG00000032802	Srxn1	353
ENSMUSG00000032812	Arap1	6532
ENSMUSG00000032816	Igdcc4	673
ENSMUSG00000032898	Fbxo21	9894
ENSMUSG00000032898	Fbxo21	2546
ENSMUSG00000032939	Nup93	-8657
ENSMUSG00000032942	Ucp3	-7612
ENSMUSG00000032946	Rasgrp2	2971
ENSMUSG00000032977	1810008A18Rik	5572
ENSMUSG00000033016	Nfatc1	5338
ENSMUSG00000033022	Cdo1	6271
ENSMUSG00000033114	Slc35d2	5441
ENSMUSG00000033220	Rac2	-8629
ENSMUSG00000033228	Scaf11	-4547
ENSMUSG00000033287	Kctd17	3309
ENSMUSG00000033308	Dpyd	4828
ENSMUSG00000033368	Trim69	-4460
ENSMUSG00000033405	Nudt15	-4488
ENSMUSG00000033417	2700078E11Rik	-504
ENSMUSG00000033427	Upb1	1071
ENSMUSG00000033444	Specc1l	8845
ENSMUSG00000033478	Fam160b1	6533
ENSMUSG00000033478	Fam160b1	4194
ENSMUSG00000033589	Reep4	-4541
ENSMUSG00000033594	Spata2L	-8353
ENSMUSG00000033596	Rfwd3	-96
ENSMUSG00000033684	Qsox1	7148
ENSMUSG00000033703	Fuk	-189
ENSMUSG00000033713	Foxn3	9768
ENSMUSG00000033715	Akr1c14	-83
ENSMUSG00000033808	Tmem87a	-581
ENSMUSG00000033831	Fgb	9874
ENSMUSG00000033852	Pla2g4b	24
ENSMUSG00000033860	Fgg	-4537
ENSMUSG00000033862	Cdk10	-266
ENSMUSG00000033909	Usp36	-187
ENSMUSG00000034059	Ypel4	-2771
ENSMUSG00000034066	Farp2	-331
ENSMUSG00000034126	Pomt2	-9559
ENSMUSG00000034126	Pomt2	-427
ENSMUSG00000034126	Pomt2	-92
ENSMUSG00000034165	Ccnd3	6486
ENSMUSG00000034171	Faah	259
ENSMUSG00000034269	Setd5	5023
ENSMUSG00000034278	Dnajc17	-124
ENSMUSG00000034285	Nipsnap1	9068
ENSMUSG00000034285	Nipsnap1	775
ENSMUSG00000034308	Sdr42e1	-2846
ENSMUSG00000034308	Sdr42e1	6233
ENSMUSG00000034341	Wbp2	-1444
ENSMUSG00000034371	Dak	1005
ENSMUSG00000034390	4933407C03Rik	3426
ENSMUSG00000034424	Gcsh	323
ENSMUSG00000034456	Uroc1	-557
ENSMUSG00000034471	Caskin2	-464
ENSMUSG00000034528	Hsd17b13	-44
ENSMUSG00000034560	A230046K03Rik	-63
ENSMUSG00000034663	Bmp2k	-455
ENSMUSG00000034667	Xpot	-525
ENSMUSG00000034667	Xpot	1415
ENSMUSG00000034706	Dnaic2	-6608
ENSMUSG00000034714	Ttyh2	9674
ENSMUSG00000034714	Ttyh2	1210
ENSMUSG00000034738	Nostrin	-51
ENSMUSG00000034781	Gna11	-1387
ENSMUSG00000034781	Gna11	3215
ENSMUSG00000034795	Ccdc122	-2217
ENSMUSG00000034826	Nup54	-7622
ENSMUSG00000034837	Gnat1	4199
ENSMUSG00000034837	Gnat1	4608
ENSMUSG00000034891	Sncb	8061
ENSMUSG00000034918	Cdhr2	-67
ENSMUSG00000034926	Dhcr24	2086
ENSMUSG00000034947	Tmem106a	7374
ENSMUSG00000034957	Cebpa	5403
ENSMUSG00000034957	Cebpa	-2518
ENSMUSG00000034994	Eef2	-253
ENSMUSG00000034997	Htr2a	9294
ENSMUSG00000035011	Zbtb7a	1770
ENSMUSG00000035041	Creb3l3	6107
ENSMUSG00000035069	Oma1	-79
ENSMUSG00000035237	Lcat	673
ENSMUSG00000035268	Pkig	291
ENSMUSG00000035325	Sec31a	3128
ENSMUSG00000035342	Lzts2	-129
ENSMUSG00000035472	Slc25a21	-55
ENSMUSG00000035473	Galm	664
ENSMUSG00000035504	Reep6	2330
ENSMUSG00000035517	Tdrd7	3858
ENSMUSG00000035517	Tdrd7	1583
ENSMUSG00000035530	Eif1	-6395
ENSMUSG00000035540	Gc	-9462
ENSMUSG00000035540	Gc	9569
ENSMUSG00000035547	Capn5	164
ENSMUSG00000035561	Aldh1b1	-9243
ENSMUSG00000035569	Ankrd11	-9651
ENSMUSG00000035673	Sbno2	3812
ENSMUSG00000035757	1300018J18Rik	-5075
ENSMUSG00000035769	Xylb	119
ENSMUSG00000035811	Ugt2b35	4013
ENSMUSG00000035818	9930023K05Rik	58
ENSMUSG00000035828	Pim3	8806
ENSMUSG00000035852	9130017N09Rik	1552
ENSMUSG00000035875	AI182371	-2322
ENSMUSG00000035967	Ddx26b	4345
ENSMUSG00000036078	Sigmar1	-4367
ENSMUSG00000036078	Sigmar1	-3273
ENSMUSG00000036083	Slc17a3	-2497
ENSMUSG00000036106	Prr5	5763
ENSMUSG00000036136	Fam110c	21
ENSMUSG00000036158	Prickle1	-690
ENSMUSG00000036196	Slc26a8	7180
ENSMUSG00000036216	Leap2	-142
ENSMUSG00000036241	Ube2r2	1048
ENSMUSG00000036309	Skp1a	-7531
ENSMUSG00000036391	Sec24a	7884
ENSMUSG00000036432	Siah2	5681
ENSMUSG00000036503	Rnf13	-517
ENSMUSG00000036513	Commd2	-53
ENSMUSG00000036528	Ppfibp2	19
ENSMUSG00000036570	Fxyd1	185
ENSMUSG00000036606	Plxnb2	3086
ENSMUSG00000036641	Ccdc148	2367
ENSMUSG00000036661	Dennd3	-1181
ENSMUSG00000036813	Entpd8	-78
ENSMUSG00000036816	Atoh7	-8067
ENSMUSG00000036880	Acaa2	2723
ENSMUSG00000036880	Acaa2	1177
ENSMUSG00000036890	Gtdc1	7045
ENSMUSG00000036990	Otud4	774
ENSMUSG00000036995	Asap3	8707
ENSMUSG00000037001	Zfp39	601
ENSMUSG00000037029	Zfp146	-24
ENSMUSG00000037053	Azgp1	-6539
ENSMUSG00000037071	Scd1	-8692
ENSMUSG00000037151	Lrrc20	-8697
ENSMUSG00000037157	Il22ra1	-173
ENSMUSG00000037166	Ppp1r14a	2158
ENSMUSG00000037171	Nodal	8676
ENSMUSG00000037171	Nodal	8390
ENSMUSG00000037171	Nodal	-4495
ENSMUSG00000037221	Mospd3	243
ENSMUSG00000037242	Clic4	-2177
ENSMUSG00000037254	Itih2	2765
ENSMUSG00000037260	Hgsnat	-7517
ENSMUSG00000037321	Tap1	-7330
ENSMUSG00000037326	Solh	5301
ENSMUSG00000037331	Larp1	-9864
ENSMUSG00000037361	0610009D07Rik	-266
ENSMUSG00000037366	Pafah2	1042
ENSMUSG00000037373	Ctbp1	-405
ENSMUSG00000037373	Ctbp1	5481
ENSMUSG00000037405	Icam1	92
ENSMUSG00000037410	Tbc1d2b	7690
ENSMUSG00000037411	Serpine1	-496
ENSMUSG00000037443	Ccdc21	5610
ENSMUSG00000037458	Azin1	973
ENSMUSG00000037514	Pank2	-349
ENSMUSG00000037533	Rapgef6	96
ENSMUSG00000037542	Aldh8a1	970
ENSMUSG00000037542	Aldh8a1	167
ENSMUSG00000037542	Aldh8a1	-16
ENSMUSG00000037656	Slc20a2	-1154
ENSMUSG00000037679	Inf2	-1143
ENSMUSG00000037692	Ahdc1	-3056
ENSMUSG00000037703	Prosapip1	4196
ENSMUSG00000037752	Xkr8	-3550
ENSMUSG00000037772	Mrpl23	3190
ENSMUSG00000037780	Mbl1	9487
ENSMUSG00000037795	N4bp2	-405
ENSMUSG00000037815	Ctnna1	-412
ENSMUSG00000038069	Cdkn2aip	6946
ENSMUSG00000038127	Ccdc50	-864
ENSMUSG00000038167	Plekhg6	-256
ENSMUSG00000038195	Rilp	-317
ENSMUSG00000038208	Pgap3	5219
ENSMUSG00000038213	Tapbpl	-72
ENSMUSG00000038224	Serpinf2	-4306
ENSMUSG00000038246	Fam50b	7614
ENSMUSG00000038246	Fam50b	3828
ENSMUSG00000038286	Bphl	8435
ENSMUSG00000038304	Cd160	-790
ENSMUSG00000038304	Cd160	-615
ENSMUSG00000038357	Camp	-6687
ENSMUSG00000038371	Sbf2	-1097
ENSMUSG00000038375	Trp53inp2	-7057
ENSMUSG00000038403	Hfe2	978
ENSMUSG00000038422	Hdhd3	228
ENSMUSG00000038495	Otud7b	162
ENSMUSG00000038508	Gdf15	-4626
ENSMUSG00000038527	C1rl	7276
ENSMUSG00000038533	Cbfa2t2	318
ENSMUSG00000038550	Gm129	-2384
ENSMUSG00000038578	Susd1	-1537
ENSMUSG00000038582	Pptc7	-9259
ENSMUSG00000038582	Pptc7	-9448
ENSMUSG00000038618	Rassf7	534
ENSMUSG00000038671	Arfrp1	0
ENSMUSG00000038696	Mapkap1	407
ENSMUSG00000038704	Aspdh	898
ENSMUSG00000038704	Aspdh	76
ENSMUSG00000038712	Fam63a	-3853
ENSMUSG00000038745	Nlrp6	6628
ENSMUSG00000038751	Ptk6	5680
ENSMUSG00000038803	Ost4	-1697
ENSMUSG00000038894	Irs2	-1532
ENSMUSG00000038903	Ccdc68	40
ENSMUSG00000038967	Pdk2	-1017
ENSMUSG00000038991	Txndc5	3368
ENSMUSG00000039043	2610034B18Rik	-325
ENSMUSG00000039065	Fam173b	4574
ENSMUSG00000039084	Chad	1642
ENSMUSG00000039131	Gipc2	240
ENSMUSG00000039176	Polg	-347
ENSMUSG00000039197	Adk	272
ENSMUSG00000039307	Hexdc	-2558
ENSMUSG00000039349	C130074G19Rik	150
ENSMUSG00000039364	Sectm1b	5358
ENSMUSG00000039367	Sec24c	-432
ENSMUSG00000039396	Neil3	-84
ENSMUSG00000039431	Mtmr7	-97
ENSMUSG00000039438	Ttc36	1134
ENSMUSG00000039450	Dcxr	18
ENSMUSG00000039463	Slc9a8	-5422
ENSMUSG00000039474	Wfs1	-289
ENSMUSG00000039477	Tnrc18	-1142
ENSMUSG00000039615	Stub1	-241
ENSMUSG00000039616	Mocos	2
ENSMUSG00000039693	5730528L13Rik	-3534
ENSMUSG00000039809	Gabbr2	3442
ENSMUSG00000039809	Gabbr2	3886
ENSMUSG00000039844	Rapgef1	4265
ENSMUSG00000039844	Rapgef1	3738
ENSMUSG00000039887	Alg14	-77
ENSMUSG00000039903	4931408A02Rik	3767
ENSMUSG00000039903	4931408A02Rik	3295
ENSMUSG00000039958	4833442J19Rik	1651
ENSMUSG00000039967	Zfp292	-170
ENSMUSG00000039981	Zc3h12d	-208
ENSMUSG00000039982	Dtx4	-235
ENSMUSG00000039988	Ankrd13c	8980
ENSMUSG00000040007	Bahd1	2361
ENSMUSG00000040034	Nup43	-3805
ENSMUSG00000040134	Rdh7	141
ENSMUSG00000040177	2310057M21Rik	-10
ENSMUSG00000040213	Ccbl2	5986
ENSMUSG00000040213	Ccbl2	50
ENSMUSG00000040249	Lrp1	-1009
ENSMUSG00000040249	Lrp1	8697
ENSMUSG00000040302	C030048B08Rik	251
ENSMUSG00000040413	Timd2	49
ENSMUSG00000040413	Timd2	8098
ENSMUSG00000040481	Bptf	-652
ENSMUSG00000040525	Cblc	3402
ENSMUSG00000040543	Pitpnm3	-4717
ENSMUSG00000040599	Mis12	-6762
ENSMUSG00000040600	Eps8l3	-9905
ENSMUSG00000040706	Agmat	151
ENSMUSG00000040712	Camta2	9335
ENSMUSG00000040731	Eif4h	-8208
ENSMUSG00000040738	Ints8	49
ENSMUSG00000040761	Spen	1981
ENSMUSG00000040842	D4Ertd22e	8042
ENSMUSG00000040843	Tiprl	7228
ENSMUSG00000040859	Bsdc1	36
ENSMUSG00000041025	Iffo2	4628
ENSMUSG00000041058	Wwp1	5686
ENSMUSG00000041112	Elmo1	1126
ENSMUSG00000041119	Pde9a	5408
ENSMUSG00000041135	Ripk2	1531
ENSMUSG00000041141	Pnmal1	8722
ENSMUSG00000041168	Lonp1	-333
ENSMUSG00000041237	Pklr	334
ENSMUSG00000041287	Sox15	-9246
ENSMUSG00000041293	Gpr110	-31
ENSMUSG00000041415	Dicer1	5166
ENSMUSG00000041515	Irf8	-7409
ENSMUSG00000041638	Gcn1l1	3603
ENSMUSG00000041653	Pnpla3	1123
ENSMUSG00000041660	Bbox1	8802
ENSMUSG00000041757	Plekha6	9510
ENSMUSG00000041769	Ppp2r2d	-2352
ENSMUSG00000041779	Tram2	9271
ENSMUSG00000041781	Cpsf2	5837
ENSMUSG00000041846	Smek1	-2601
ENSMUSG00000041846	Smek1	-1368
ENSMUSG00000041846	Smek1	-158
ENSMUSG00000041870	Ankrd13a	-2290
ENSMUSG00000041915	Ammecr1l	5365
ENSMUSG00000041930	BC057022	5102
ENSMUSG00000041936	Agrn	8061
ENSMUSG00000041997	Tlk1	-6390
ENSMUSG00000042041	2010003K11Rik	1850
ENSMUSG00000042043	Tbca	380
ENSMUSG00000042055	Wdr11	-48
ENSMUSG00000042087	4933440N22Rik	-9264
ENSMUSG00000042104	Uggt2	-61
ENSMUSG00000042105	Inpp5f	6388
ENSMUSG00000042121	Ssh1	7400
ENSMUSG00000042210	Abhd14a	48
ENSMUSG00000042228	Lyn	-119
ENSMUSG00000042251	Pm20d1	34
ENSMUSG00000042284	Itga1	91
ENSMUSG00000042286	Stab1	8279
ENSMUSG00000042305	Tmem183a	2646
ENSMUSG00000042323	Pbrm1	3683
ENSMUSG00000042328	Hps4	1470
ENSMUSG00000042333	Tnfrsf14	387
ENSMUSG00000042349	Ikbke	4535
ENSMUSG00000042429	Adora1	-2157
ENSMUSG00000042487	Leo1	3635
ENSMUSG00000042569	Dhrs7b	-5105
ENSMUSG00000042594	Sh2b3	-2337
ENSMUSG00000042632	Pla2g6	-128
ENSMUSG00000042632	Pla2g6	6590
ENSMUSG00000042659	Arrdc4	3336
ENSMUSG00000042688	Mapk6	786
ENSMUSG00000042745	Id1	3320
ENSMUSG00000042770	Hebp1	2674
ENSMUSG00000042797	Aqp11	-2833
ENSMUSG00000042797	Aqp11	228
ENSMUSG00000042851	Zc3h6	23
ENSMUSG00000042978	Sbk1	3358
ENSMUSG00000043140	Tmem186	-554
ENSMUSG00000043154	Ppp2r3a	-1459
ENSMUSG00000043290	Zfp784	61
ENSMUSG00000043311	D17H6S53E	-594
ENSMUSG00000043372	Hexim2	534
ENSMUSG00000043432	Leng9	-963
ENSMUSG00000043535	Setx	1050
ENSMUSG00000043587	Acpl2	2944
ENSMUSG00000043681	Fam25c	-2407
ENSMUSG00000043716	Rpl7	-334
ENSMUSG00000043789	Vwce	760
ENSMUSG00000043811	Rtn4r	8568
ENSMUSG00000043822	Adamtsl5	-3676
ENSMUSG00000044005	Gls2	7583
ENSMUSG00000044095	2410075B13Rik	6528
ENSMUSG00000044122	Proca1	9176
ENSMUSG00000044134	Fam109a	4936
ENSMUSG00000044134	Fam109a	1074
ENSMUSG00000044147	Arf6	-4320
ENSMUSG00000044252	Osbpl1a	-7496
ENSMUSG00000044345	Marveld1	-845
ENSMUSG00000044408	1110002B05Rik	4032
ENSMUSG00000044465	Fam160a2	-289
ENSMUSG00000044469	Tnfaip8l1	-5525
ENSMUSG00000044617	Zbtb39	-1190
ENSMUSG00000044617	Zbtb39	-1387
ENSMUSG00000044674	Fzd1	-368
ENSMUSG00000044712	Slc38a6	10
ENSMUSG00000044734	Serpinb1a	1821
ENSMUSG00000044749	Abca6	-737
ENSMUSG00000044749	Abca6	6825
ENSMUSG00000044768	D1Ertd622e	-152
ENSMUSG00000044786	Zfp36	-4124
ENSMUSG00000044867	Gm3345	-2017
ENSMUSG00000044867	Gm3345	-1247
ENSMUSG00000044876	Zfp444	1873
ENSMUSG00000044876	Zfp444	-2576
ENSMUSG00000044986	Tst	2322
ENSMUSG00000045095	Magi1	-1090
ENSMUSG00000045110	Rassf8	-8502
ENSMUSG00000045193	Cirbp	-4936
ENSMUSG00000045216	Hs6st1	6779
ENSMUSG00000045248	Med26	-227
ENSMUSG00000045282	Tmem86b	-731
ENSMUSG00000045282	Tmem86b	106
ENSMUSG00000045316	Fahd1	11
ENSMUSG00000045316	Fahd1	2770
ENSMUSG00000045348	6430598A04Rik	-186
ENSMUSG00000045503	Sys1	-1978
ENSMUSG00000045629	Sh3tc2	6552
ENSMUSG00000045636	Mtus1	-2007
ENSMUSG00000045886	Gm9803	3165
ENSMUSG00000045934	Mtmr11	-762
ENSMUSG00000045942	BC049762	-568
ENSMUSG00000045980	Tmem104	-8498
ENSMUSG00000045980	Tmem104	-9486
ENSMUSG00000045980	Tmem104	-9811
ENSMUSG00000045983	Eif4g1	4253
ENSMUSG00000046027	Stard5	6015
ENSMUSG00000046027	Stard5	1029
ENSMUSG00000046079	Lrrc8d	2760
ENSMUSG00000046213	Cym	-8392
ENSMUSG00000046311	Zfp62	442
ENSMUSG00000046314	Stxbp6	-192
ENSMUSG00000046314	Stxbp6	4320
ENSMUSG00000046323	Dppa3	-1037
ENSMUSG00000046352	Gjb2	2969
ENSMUSG00000046402	Rbp1	133
ENSMUSG00000046402	Rbp1	-80
ENSMUSG00000046447	Camk2n1	5690
ENSMUSG00000046598	Bdh1	-24
ENSMUSG00000046598	Bdh1	-2558
ENSMUSG00000046718	Bst2	-385
ENSMUSG00000046792	Zfp787	762
ENSMUSG00000046794	Ppp1r3b	-216
ENSMUSG00000046811	Gltpd2	-141
ENSMUSG00000046814	Gchfr	-155
ENSMUSG00000046840	0610008F07Rik	1003
ENSMUSG00000046909	1110002N22Rik	-4047
ENSMUSG00000046949	Nqo2	-122
ENSMUSG00000046949	Nqo2	-6714
ENSMUSG00000046959	Slc26a1	746
ENSMUSG00000047126	Cltc	-291
ENSMUSG00000047129	1700113H08Rik	-6023
ENSMUSG00000047150	1700001C19Rik	-2112
ENSMUSG00000047228	BC048546	-2664
ENSMUSG00000047298	Kcnv2	6231
ENSMUSG00000047417	Rexo1	798
ENSMUSG00000047492	Inhbe	-514
ENSMUSG00000047492	Inhbe	1107
ENSMUSG00000047502	Heatr8	-98
ENSMUSG00000047592	BC055004	8524
ENSMUSG00000047613	A430005L14Rik	323
ENSMUSG00000047631	Apof	561
ENSMUSG00000047728	BC025446	391
ENSMUSG00000047733	BC048609	-3016
ENSMUSG00000047822	Gm6484	-4297
ENSMUSG00000047866	Lonp2	-8714
ENSMUSG00000047881	Rell1	4150
ENSMUSG00000048076	Arf1	5813
ENSMUSG00000048106	4632415L05Rik	19
ENSMUSG00000048249	A930001N09Rik	845
ENSMUSG00000048307	Ankrd46	5155
ENSMUSG00000048371	Pdp2	-129
ENSMUSG00000048416	Mlf1	-644
ENSMUSG00000048439	Nupl2	-52
ENSMUSG00000048480	Cxcr1	-2083
ENSMUSG00000048572	E030010A14Rik	9426
ENSMUSG00000048756	Foxo3	5962
ENSMUSG00000048769	H1f0	-2063
ENSMUSG00000048769	H1f0	-5811
ENSMUSG00000048856	Slc25a47	4313
ENSMUSG00000048856	Slc25a47	4093
ENSMUSG00000048856	Slc25a47	-714
ENSMUSG00000048897	Zfp710	7901
ENSMUSG00000048897	Zfp710	3132
ENSMUSG00000048965	Mrgpre	-8389
ENSMUSG00000049091	Sephs2	-2853
ENSMUSG00000049112	Oxtr	-8783
ENSMUSG00000049230	Gm9833	-2235
ENSMUSG00000049230	Gm9833	-2414
ENSMUSG00000049295	Zfp219	585
ENSMUSG00000049339	Fam134a	6196
ENSMUSG00000049382	Krt8	1152
ENSMUSG00000049493	Pls1	-647
ENSMUSG00000049504	2810046L04Rik	6155
ENSMUSG00000049580	Tsku	6238
ENSMUSG00000049653	Spatc1	1934
ENSMUSG00000049755	Zfp672	-95
ENSMUSG00000049807	Arhgap23	-9322
ENSMUSG00000049904	Tmem17	593
ENSMUSG00000049907	Rasl11b	1198
ENSMUSG00000050103	Agmo	190
ENSMUSG00000050114	Prdx6-ps1	8653
ENSMUSG00000050122	Vwa3b	-273
ENSMUSG00000050373	Snx21	66
ENSMUSG00000050423	Ppp1r3g	903
ENSMUSG00000050445	Cyp8b1	-4213
ENSMUSG00000050445	Cyp8b1	-71
ENSMUSG00000050541	Adra1b	9578
ENSMUSG00000050671	Ism2	-501
ENSMUSG00000050747	Trim15	-18
ENSMUSG00000050777	Tmem37	1003
ENSMUSG00000050777	Tmem37	9790
ENSMUSG00000050846	Zfp623	494
ENSMUSG00000050866	Clrn3	6727
ENSMUSG00000050908	Fam18a	-1820
ENSMUSG00000051007	Pddc1	-6138
ENSMUSG00000051007	Pddc1	-269
ENSMUSG00000051225	Fam83a	-5874
ENSMUSG00000051285	Pcmtd1	918
ENSMUSG00000051331	Cacna1c	-4355
ENSMUSG00000051351	Zfp46	1105
ENSMUSG00000051495	Irf2bp2	9682
ENSMUSG00000051502	Ufsp1	-1201
ENSMUSG00000051652	Lrrc3	2238
ENSMUSG00000051671	1810063B05Rik	1882
ENSMUSG00000051716	Apon	-182
ENSMUSG00000051721	BC068281	67
ENSMUSG00000051768	Xrcc1	-228
ENSMUSG00000051817	Sox12	1182
ENSMUSG00000051998	Lax1	-4255
ENSMUSG00000052151	Ppap2c	465
ENSMUSG00000052222	1700084E18Rik	-8975
ENSMUSG00000052271	Bhlha15	9227
ENSMUSG00000052403	Gm13520	-7640
ENSMUSG00000052406	Rexo4	7091
ENSMUSG00000052467	D630004N19Rik	-7491
ENSMUSG00000052477	C130026I21Rik	-1740
ENSMUSG00000052557	Gan	7720
ENSMUSG00000052566	Hook2	247
ENSMUSG00000052566	Hook2	-952
ENSMUSG00000052595	A1cf	75
ENSMUSG00000052656	Rnf103	-832
ENSMUSG00000052675	Zfp112	833
ENSMUSG00000052837	Junb	-1778
ENSMUSG00000052906	Ubxn8	293
ENSMUSG00000052928	Ctif	-298
ENSMUSG00000052974	Cyp2f2	4602
ENSMUSG00000053110	Yap1	1018
ENSMUSG00000053113	Socs3	7710
ENSMUSG00000053175	Bcl3	-2027
ENSMUSG00000053181	A830005F24Rik	-491
ENSMUSG00000053436	Mapk14	5498
ENSMUSG00000053436	Mapk14	-78
ENSMUSG00000053560	Ier2	5829
ENSMUSG00000053603	4930442H23Rik	1641
ENSMUSG00000053617	Sh3pxd2a	6259
ENSMUSG00000053617	Sh3pxd2a	9274
ENSMUSG00000053640	Gm9915	-2874
ENSMUSG00000053646	Plxnb1	-748
ENSMUSG00000053863	Mepe	7953
ENSMUSG00000053906	Mafg	-2552
ENSMUSG00000053964	Lgals4	3319
ENSMUSG00000054008	Ndst1	1560
ENSMUSG00000054051	Ercc6	-112
ENSMUSG00000054115	Skp2	5591
ENSMUSG00000054150	4831426I19Rik	9216
ENSMUSG00000054252	Fgfr3	2489
ENSMUSG00000054364	Rhob	-4410
ENSMUSG00000054793	Cadm4	-6577
ENSMUSG00000054920	Klhl5	-184
ENSMUSG00000054932	Afp	-4839
ENSMUSG00000055301	Adh7	6646
ENSMUSG00000055312	0610012H03Rik	-107
ENSMUSG00000055396	D830050J10Rik	-9292
ENSMUSG00000055538	Zcchc24	1097
ENSMUSG00000055553	2810422J05Rik	-2002
ENSMUSG00000055561	Spink5	2661
ENSMUSG00000055629	B4galnt4	3146
ENSMUSG00000055652	Klhl25	7992
ENSMUSG00000055657	E030030I06Rik	6172
ENSMUSG00000055720	Ubl7	-6609
ENSMUSG00000055730	Ces2a	-97
ENSMUSG00000055737	Ghr	-1004
ENSMUSG00000055782	Abcd2	-25
ENSMUSG00000055833	1700034H15Rik	-3318
ENSMUSG00000055862	Izumo4	-76
ENSMUSG00000055866	Per2	-4229
ENSMUSG00000056204	Pgpep1	-6059
ENSMUSG00000056204	Pgpep1	134
ENSMUSG00000056204	Pgpep1	6189
ENSMUSG00000056234	Ncoa4	136
ENSMUSG00000056370	Sftpb	-1878
ENSMUSG00000056411	Gm12500	-278
ENSMUSG00000056413	Adap1	-7180
ENSMUSG00000056413	Adap1	7953
ENSMUSG00000056413	Adap1	8147
ENSMUSG00000056429	Tgoln1	-2048
ENSMUSG00000056487	AB099516	-6250
ENSMUSG00000056501	Cebpb	-1055
ENSMUSG00000056598	Lrrc48	2667
ENSMUSG00000056608	Chd9	-3069
ENSMUSG00000056608	Chd9	-3315
ENSMUSG00000056665	4930572J05Rik	-1596
ENSMUSG00000056692	D17Wsu92e	-369
ENSMUSG00000056724	Nbeal2	16
ENSMUSG00000056749	Nfil3	6233
ENSMUSG00000056770	Setd3	-363
ENSMUSG00000056771	Gm10010	-35
ENSMUSG00000056938	Acbd4	3824
ENSMUSG00000057110	Cep110	8
ENSMUSG00000057228	Aadat	-10
ENSMUSG00000057299	Vmn1r192	-1323
ENSMUSG00000057530	Ece1	5563
ENSMUSG00000057530	Ece1	-247
ENSMUSG00000057531	Dtnbp1	654
ENSMUSG00000057554	Lgals8	8052
ENSMUSG00000057572	Zbtb8os	228
ENSMUSG00000057637	Prdm2	-4429
ENSMUSG00000057666	Gapdh	-2590
ENSMUSG00000057666	Gapdh	559
ENSMUSG00000057666	Gapdh	2626
ENSMUSG00000057880	Abat	-133
ENSMUSG00000057933	Gsta2	855
ENSMUSG00000058216	BC021614	2688
ENSMUSG00000058318	Phf21a	632
ENSMUSG00000058398	Prss43	-5039
ENSMUSG00000058427	Cxcl2	-4361
ENSMUSG00000058537	Dux	682
ENSMUSG00000058537	Dux	3314
ENSMUSG00000058607	Gm6635	-362
ENSMUSG00000058638	Zfp110	214
ENSMUSG00000058672	Tubb2a	-1901
ENSMUSG00000058690	Gcap14	-2695
ENSMUSG00000058690	Gcap14	-153
ENSMUSG00000058700	Gm8724	-4131
ENSMUSG00000058709	Egln2	407
ENSMUSG00000058761	Rnf169	2277
ENSMUSG00000058914	C1qtnf3	7083
ENSMUSG00000058997	1300010F03Rik	3884
ENSMUSG00000058997	1300010F03Rik	1716
ENSMUSG00000059022	Kcp	-5592
ENSMUSG00000059078	Gm10060	42
ENSMUSG00000059078	Gm10060	-6641
ENSMUSG00000059248	2009-09-01	5119
ENSMUSG00000059352	Gm10064	6920
ENSMUSG00000059447	Hadhb	72
ENSMUSG00000059481	Plg	6869
ENSMUSG00000059552	Trp53	1090
ENSMUSG00000059554	Ccdc28a	373
ENSMUSG00000059571	Gm16218	-6634
ENSMUSG00000059588	Calcrl	-4626
ENSMUSG00000059775	Rps26-ps1	-9717
ENSMUSG00000059824	Dbp	3209
ENSMUSG00000059839	Zfp874b	-11
ENSMUSG00000059839	Zfp874b	193
ENSMUSG00000059878	Zfp422	-6527
ENSMUSG00000060183	Cxcl11	-5060
ENSMUSG00000060261	Gtf2i	-186
ENSMUSG00000060407	Cyp2a12	-23
ENSMUSG00000060538	Tmem219	-40
ENSMUSG00000060538	Tmem219	1257
ENSMUSG00000060566	Rpl21-ps3	690
ENSMUSG00000060613	Cyp2c70	-77
ENSMUSG00000060657	4921513D23Rik	3472
ENSMUSG00000060703	Cd302	-109
ENSMUSG00000060802	B2m	-6562
ENSMUSG00000060992	Copz1	3270
ENSMUSG00000061104	Gm10094	8353
ENSMUSG00000061288	Taok3	-953
ENSMUSG00000061353	Cxcl12	5513
ENSMUSG00000061353	Cxcl12	1578
ENSMUSG00000061360	Phf5a	-177
ENSMUSG00000061479	Snrpa	-179
ENSMUSG00000061728	Btnl7	-8060
ENSMUSG00000061731	Ext1	2642
ENSMUSG00000061740	Cyp2d22	631
ENSMUSG00000061759	1700052N19Rik	199
ENSMUSG00000061808	Ttr	-5201
ENSMUSG00000061816	Myl1	4359
ENSMUSG00000061947	Serpina10	-120
ENSMUSG00000061959	Ces1e	-180
ENSMUSG00000061959	Ces1e	41
ENSMUSG00000062014	Gmfb	5069
ENSMUSG00000062054	Iah1	4250
ENSMUSG00000062742	Gm5239	-4335
ENSMUSG00000062861	Zfp28	-170
ENSMUSG00000063229	Ldha	-2822
ENSMUSG00000063235	Ptpmt1	-334
ENSMUSG00000063320	1190007I07Rik	-343
ENSMUSG00000063354	Slc39a4	984
ENSMUSG00000063382	Bcl9l	-8278
ENSMUSG00000063760	Rnf217	2219
ENSMUSG00000063856	Gpx1	3252
ENSMUSG00000063870	Chd4	-7300
ENSMUSG00000064081	Gm8973	8673
ENSMUSG00000064120	Mocs1	-5240
ENSMUSG00000064373	Sepp1	2359
ENSMUSG00000064422	U6	2620
ENSMUSG00000064523	U6	-8186
ENSMUSG00000064523	U6	-8601
ENSMUSG00000064523	U6	-8906
ENSMUSG00000064523	U6	-9191
ENSMUSG00000064672	SNORA2	-193
ENSMUSG00000064742	U6	1480
ENSMUSG00000064802	U1	-5007
ENSMUSG00000064802	U1	5120
ENSMUSG00000064807	U3	-1887
ENSMUSG00000064855	U1	758
ENSMUSG00000064954	U6	5821
ENSMUSG00000065037	7SK	361
ENSMUSG00000065182	SNORA42	6639
ENSMUSG00000065196	Snord85	-3524
ENSMUSG00000065309	U6	-2624
ENSMUSG00000065331	U6	-3631
ENSMUSG00000065400	Mir200a	172
ENSMUSG00000065455	Mir21	3643
ENSMUSG00000065556	Mir101b	-801
ENSMUSG00000065556	Mir101b	-8756
ENSMUSG00000065571	Mir326	-6886
ENSMUSG00000065574	Mir203	-645
ENSMUSG00000065582	Mir194-2	-1477
ENSMUSG00000065593	Mir339	563
ENSMUSG00000065593	Mir339	865
ENSMUSG00000065594	Mir107	1047
ENSMUSG00000065608	Mirlet7c-2	-925
ENSMUSG00000065678	U6	-2040
ENSMUSG00000065706	SNORA61	2876
ENSMUSG00000065832	U6	5195
ENSMUSG00000065944	U2	3120
ENSMUSG00000065979	Cpped1	33
ENSMUSG00000066026	Dhrs3	9316
ENSMUSG00000066026	Dhrs3	2029
ENSMUSG00000066043	Phactr4	537
ENSMUSG00000066178	6030445D17Rik	-9258
ENSMUSG00000066235	C85492	-14
ENSMUSG00000066319	Rtp3	-3930
ENSMUSG00000066319	Rtp3	-34
ENSMUSG00000066319	Rtp3	3988
ENSMUSG00000066715	Gm10174	-9979
ENSMUSG00000066964	Tmem211	-6175
ENSMUSG00000067071	Hes6	299
ENSMUSG00000067203	H2-K2	-102
ENSMUSG00000067219	Nipal1	1291
ENSMUSG00000067656	Slc22a27	-2925
ENSMUSG00000067882	Gm5146	1343
ENSMUSG00000068040	Tm9sf4	9350
ENSMUSG00000068086	Cyp2d9	-2177
ENSMUSG00000068115	Ninl	206
ENSMUSG00000068284	Gm608	2049
ENSMUSG00000068303	Spr-ps1	445
ENSMUSG00000068463	B630019A10Rik	-1208
ENSMUSG00000068697	Myoz1	3638
ENSMUSG00000068742	Cry2	1567
ENSMUSG00000068742	Cry2	5986
ENSMUSG00000068745	Mybphl	3051
ENSMUSG00000068860	Gm128	1422
ENSMUSG00000069041	Slc25a31	-3871
ENSMUSG00000069439	Gm8444	3703
ENSMUSG00000069520	Tmem19	3029
ENSMUSG00000069565	Dazap1	9549
ENSMUSG00000069633	Pex11c	-39
ENSMUSG00000069874	Irgm2	-287
ENSMUSG00000069875	Frmd4a	1892
ENSMUSG00000070034	Sp110	-18
ENSMUSG00000070170	SNORA71	2095
ENSMUSG00000070493	Chchd2	8375
ENSMUSG00000070495	Ctcfl	-5077
ENSMUSG00000070544	Top1	-199
ENSMUSG00000070574	2310016G11Rik	6866
ENSMUSG00000070577	Gm572	-1904
ENSMUSG00000070644	Etnk2	8701
ENSMUSG00000070690	5830473C10Rik	-230
ENSMUSG00000070717	Gm10300	-8515
ENSMUSG00000070867	Gm12824	-934
ENSMUSG00000070873	Lilra5	1497
ENSMUSG00000071335	G630090E17Rik	-62
ENSMUSG00000071337	Tia1	-11
ENSMUSG00000071379	Hpcal1	8954
ENSMUSG00000071711	Mpst	2964
ENSMUSG00000071793	2610005L07Rik	32
ENSMUSG00000072188	Gm10354	4901
ENSMUSG00000072294	Klf12	9205
ENSMUSG00000072693	Gm10401	-2393
ENSMUSG00000072849	Serpina1e	-4617
ENSMUSG00000072962	Gm16401	379
ENSMUSG00000073101	5730522E02Rik	516
ENSMUSG00000073418	C4b	-48
ENSMUSG00000073424	Cyp4f15	5625
ENSMUSG00000073481	Mosc2	-4731
ENSMUSG00000073600	Gm1614	-2864
ENSMUSG00000073628	Gm10552	-5423
ENSMUSG00000073628	Gm10552	-3856
ENSMUSG00000073628	Gm10552	5642
ENSMUSG00000073652	Apol7d	-1996
ENSMUSG00000073672	9930005F22Rik	-6244
ENSMUSG00000073680	Tmem88b	1347
ENSMUSG00000073823	Gm10586	-1769
ENSMUSG00000073988	Ttpa	1202
ENSMUSG00000073988	Ttpa	530
ENSMUSG00000074029	Gm10608	6721
ENSMUSG00000074029	Gm10608	5860
ENSMUSG00000074063	Osgin1	603
ENSMUSG00000074064	Mlycd	6314
ENSMUSG00000074064	Mlycd	6082
ENSMUSG00000074071	Fam169b	-1032
ENSMUSG00000074113	Gm10629	4432
ENSMUSG00000074115	Saa1	4300
ENSMUSG00000074221	Zfp568	5326
ENSMUSG00000074221	Zfp568	2347
ENSMUSG00000074238	Ap1ar	-364
ENSMUSG00000074256	Gm10655	4288
ENSMUSG00000074261	Gm7092	58
ENSMUSG00000074277	Phldb3	-2912
ENSMUSG00000074283	Zfp109	-8002
ENSMUSG00000074284	Gm10658	7627
ENSMUSG00000074336	Apoc4	3248
ENSMUSG00000074336	Apoc4	4611
ENSMUSG00000074357	AA386476	81
ENSMUSG00000074414	Gm10691	-3553
ENSMUSG00000074435	Smcp	-315
ENSMUSG00000074449	Gm15319	2411
ENSMUSG00000074579	Lekr1	312
ENSMUSG00000074646	6430550D23Rik	43
ENSMUSG00000074758	Gm5535	-9171
ENSMUSG00000074768	Bhmt	345
ENSMUSG00000074822	Gm10766	-20
ENSMUSG00000074824	Zfp708	5458
ENSMUSG00000074825	Itpripl1	40
ENSMUSG00000074861	1810034E14Rik	-109
ENSMUSG00000074886	Grk6	-223
ENSMUSG00000075025	Gm10804	2172
ENSMUSG00000075025	Gm10804	-7435
ENSMUSG00000075162	Gm10812	-1479
ENSMUSG00000075389	2810410L24Rik	4768
ENSMUSG00000075463	4930594M22Rik	-1590
ENSMUSG00000075463	4930594M22Rik	-3524
ENSMUSG00000075480	Gm10840	-5865
ENSMUSG00000075480	Gm10840	-9410
ENSMUSG00000075511	1700001L05Rik	-145
ENSMUSG00000075517	Cyp2d37-ps	-4245
ENSMUSG00000075543	Prhoxnb	777
ENSMUSG00000075558	Gm17151	2087
ENSMUSG00000075599	Smok3a	-8788
ENSMUSG00000075706	Gpx4	5068
ENSMUSG00000076144	Mir709	-1938
ENSMUSG00000076236	Mir682	7078
ENSMUSG00000076275	Mir675	7902
ENSMUSG00000076291	AC165092.1	-219
ENSMUSG00000076364	AL731552.1	2895
ENSMUSG00000076409	AC103388.1	3916
ENSMUSG00000076441	Ass1	-5450
ENSMUSG00000076441	Ass1	-9635
ENSMUSG00000076829	Trav6d-3	-2272
ENSMUSG00000076944	AC158299.1	-3712
ENSMUSG00000076961	AC158749.1	2508
ENSMUSG00000077043	AC167229.2	-7669
ENSMUSG00000077075	AC087801.1	-2060
ENSMUSG00000077082	AC159378.1	-4942
ENSMUSG00000077223	SNORA17	-504
ENSMUSG00000077339	SNORA17	-139
ENSMUSG00000077349	U6	-3451
ENSMUSG00000077438	SNORA17	-6413
ENSMUSG00000077540	SNORA17	-971
ENSMUSG00000077545	SNORA17	13
ENSMUSG00000077545	SNORA17	-9099
ENSMUSG00000077602	SNORA17	-5085
ENSMUSG00000077617	SNORA17	-70
ENSMUSG00000077682	SNORA17	-8821
ENSMUSG00000077768	SNORA17	9920
ENSMUSG00000078087	Gm15887	-3025
ENSMUSG00000078137	Gm1337	7272
ENSMUSG00000078251	Gm16487	6408
ENSMUSG00000078515	Ddi2	-8521
ENSMUSG00000078515	Ddi2	-6052
ENSMUSG00000078521	2610002D18Rik	-134
ENSMUSG00000078572	1810043H04Rik	495
ENSMUSG00000078578	Ube2d3	1078
ENSMUSG00000078650	G6pc	-9
ENSMUSG00000078650	G6pc	-5173
ENSMUSG00000078666	Gm10973	3670
ENSMUSG00000078671	Chd2	3853
ENSMUSG00000078672	Mup20	-870
ENSMUSG00000078773	Rad54b	7644
ENSMUSG00000078783	Gm9733	2472
ENSMUSG00000078853	Igtp	-196
ENSMUSG00000078860	Gm11006	-1901
ENSMUSG00000078923	Ube2v1	-9361
ENSMUSG00000078952	Gm11019	9059
ENSMUSG00000078952	Gm11019	4960
ENSMUSG00000079012	Serpina3m	1560
ENSMUSG00000079012	Serpina3m	-1064
ENSMUSG00000079015	Serpina1c	2638
ENSMUSG00000079057	Cyp4v3	-8970
ENSMUSG00000079057	Cyp4v3	-8796
ENSMUSG00000079111	Kdelr2	1629
ENSMUSG00000079420	Gm17418	31
ENSMUSG00000079514	Gm16309	-1112
ENSMUSG00000079558	Gm6981	7838
ENSMUSG00000079563	Pglyrp2	-2625
ENSMUSG00000079563	Pglyrp2	3088
ENSMUSG00000079620	Muc4	4633
ENSMUSG00000079737	3110001I22Rik	1051
ENSMUSG00000080205	Gm15526	-1906
ENSMUSG00000080536	SNORA3	5844
ENSMUSG00000080542	U4atac	204
ENSMUSG00000080564	AC191865.2	2752
ENSMUSG00000080789	Gm14007	5504
ENSMUSG00000080810	Gm11737	-5879
ENSMUSG00000080825	Gm14892	6346
ENSMUSG00000080897	Gm14500	9830
ENSMUSG00000080946	Gm12985	1171
ENSMUSG00000080957	Gm15739	453
ENSMUSG00000080967	Gm12706	-7884
ENSMUSG00000081105	Gm14087	6367
ENSMUSG00000081169	Gm12551	4624
ENSMUSG00000081243	Gm14037	3753
ENSMUSG00000081392	Gm11668	4220
ENSMUSG00000081455	Hmgb1-ps3	-4410
ENSMUSG00000081488	Gm15368	-6807
ENSMUSG00000081492	Gm9311	4476
ENSMUSG00000081634	Gm13621	-210
ENSMUSG00000081634	Gm13621	2530
ENSMUSG00000081636	Gm15901	199
ENSMUSG00000081773	Gm8302	-6022
ENSMUSG00000081774	Gm13866	3445
ENSMUSG00000081774	Gm13866	8650
ENSMUSG00000081805	Gm14335	-8867
ENSMUSG00000081805	Gm14335	7776
ENSMUSG00000081894	Gm14212	1553
ENSMUSG00000081931	Gm15211	-3517
ENSMUSG00000081998	Gm13245	-1243
ENSMUSG00000081998	Gm13245	1831
ENSMUSG00000082068	Gm2673	-4761
ENSMUSG00000082090	Gm16481	6490
ENSMUSG00000082100	Glns-ps1	-5032
ENSMUSG00000082116	Gm12188	-2817
ENSMUSG00000082116	Gm12188	-1769
ENSMUSG00000082116	Gm12188	4698
ENSMUSG00000082119	Gm12659	-3706
ENSMUSG00000082152	Gm13655	596
ENSMUSG00000082210	Gm14382	246
ENSMUSG00000082276	Gm13885	476
ENSMUSG00000082305	Gm2420	5896
ENSMUSG00000082305	Gm2420	4670
ENSMUSG00000082478	Gm11619	-2605
ENSMUSG00000082478	Gm11619	-2406
ENSMUSG00000082548	Gm12377	-2847
ENSMUSG00000082551	Gm15065	6994
ENSMUSG00000082551	Gm15065	5568
ENSMUSG00000082554	Gm15806	6738
ENSMUSG00000082614	Gm12149	-5766
ENSMUSG00000082665	Gm11470	2557
ENSMUSG00000082709	Gm12362	5538
ENSMUSG00000082725	Gm12451	5525
ENSMUSG00000082870	Gm12165	-7674
ENSMUSG00000082922	Gm6939	-845
ENSMUSG00000083001	Gm13250	-3041
ENSMUSG00000083001	Gm13250	-7933
ENSMUSG00000083004	Gm13413	2528
ENSMUSG00000083013	Gm12978	5285
ENSMUSG00000083044	Gm12416	3860
ENSMUSG00000083208	Gm11522	424
ENSMUSG00000083208	Gm11522	1684
ENSMUSG00000083264	Gm11461	3526
ENSMUSG00000083356	Gm11708	-7579
ENSMUSG00000083380	Gm3244	2999
ENSMUSG00000083430	Gm13006	7696
ENSMUSG00000083766	Gm15335	6234
ENSMUSG00000083808	Gm3828	-3264
ENSMUSG00000083849	Gm13477	3752
ENSMUSG00000084071	Gm13378	1532
ENSMUSG00000084124	Gm13588	-4045
ENSMUSG00000084154	Gm15644	2597
ENSMUSG00000084154	Gm15644	2402
ENSMUSG00000084343	Gm16198	5170
ENSMUSG00000084343	Gm16198	-1261
ENSMUSG00000084468	AC158132.1	3959
ENSMUSG00000084468	AC158132.1	4331
ENSMUSG00000084539	7SK	4565
ENSMUSG00000084548	n-R5s175	3116
ENSMUSG00000084569	U6	6086
ENSMUSG00000084572	7SK	-6218
ENSMUSG00000084590	Mir1896	3317
ENSMUSG00000084620	7SK	-9424
ENSMUSG00000084674	7SK	9089
ENSMUSG00000084810	Gm16761	484
ENSMUSG00000084839	Gm14097	-51
ENSMUSG00000084900	Gm16625	6342
ENSMUSG00000084916	Gm11656	7676
ENSMUSG00000084916	Gm11656	7454
ENSMUSG00000084987	Gm13134	-8371
ENSMUSG00000084991	Gm16260	8790
ENSMUSG00000085010	0610038P03Rik	-184
ENSMUSG00000085027	Gm11840	1577
ENSMUSG00000085033	Gm11646	-2200
ENSMUSG00000085046	Gm11467	-7389
ENSMUSG00000085062	4933404O12Rik	-146
ENSMUSG00000085076	Gm16762	-1991
ENSMUSG00000085081	A430071A18Rik	-274
ENSMUSG00000085098	Gm4221	-2107
ENSMUSG00000085168	Gm16252	3487
ENSMUSG00000085189	Gm11963	614
ENSMUSG00000085214	0610005C13Rik	94
ENSMUSG00000085236	2610206C17Rik	675
ENSMUSG00000085267	Gm14235	5281
ENSMUSG00000085298	F730035M05Rik	-4319
ENSMUSG00000085359	Gm12336	-1254
ENSMUSG00000085375	Gm12506	32
ENSMUSG00000085452	4930554G24Rik	-4474
ENSMUSG00000085485	Gm14024	1467
ENSMUSG00000085492	Trmt61b	-125
ENSMUSG00000085514	9530048J24Rik	61
ENSMUSG00000085523	Gm15945	-8220
ENSMUSG00000085536	Gm14950	7265
ENSMUSG00000085543	Gm13568	1847
ENSMUSG00000085574	Gm13053	-3971
ENSMUSG00000085592	Gm16321	-4106
ENSMUSG00000085624	Gm14573	-3291
ENSMUSG00000085626	Gm12898	2797
ENSMUSG00000085644	2310015A10Rik	287
ENSMUSG00000085653	Gm15179	4521
ENSMUSG00000085655	Gm15952	-6976
ENSMUSG00000085714	Gm13008	5378
ENSMUSG00000085720	Gm7854	-805
ENSMUSG00000085731	Gm16229	-1372
ENSMUSG00000085731	Gm16229	-2509
ENSMUSG00000085750	Gm14009	-2570
ENSMUSG00000085772	D630024D03Rik	-391
ENSMUSG00000085799	Gm6963	-7864
ENSMUSG00000085826	Gm15638	-43
ENSMUSG00000085952	Gm12315	-4739
ENSMUSG00000085964	Gm16983	7010
ENSMUSG00000085990	Gm16731	-5958
ENSMUSG00000086024	Gm16639	1229
ENSMUSG00000086040	Wipf3	-154
ENSMUSG00000086064	4930439A04Rik	-7837
ENSMUSG00000086064	4930439A04Rik	-7488
ENSMUSG00000086065	Gm16180	-2968
ENSMUSG00000086071	Gm12354	301
ENSMUSG00000086103	Gm11832	-193
ENSMUSG00000086106	1110036E04Rik	119
ENSMUSG00000086129	Gm13558	6533
ENSMUSG00000086129	Gm13558	-884
ENSMUSG00000086135	1700001J04Rik	9974
ENSMUSG00000086140	Gm13825	269
ENSMUSG00000086143	Gm16685	403
ENSMUSG00000086150	BC024582	753
ENSMUSG00000086218	Gm16755	-1013
ENSMUSG00000086231	4732447D17Rik	-6145
ENSMUSG00000086242	Gm16718	-4803
ENSMUSG00000086242	Gm16718	-4634
ENSMUSG00000086302	Gm13790	7112
ENSMUSG00000086306	Gm11754	1538
ENSMUSG00000086306	Gm11754	4903
ENSMUSG00000086335	Gm12107	6043
ENSMUSG00000086350	B230369F24Rik	-278
ENSMUSG00000086390	1810019D21Rik	-9
ENSMUSG00000086399	Gm16144	6737
ENSMUSG00000086414	Gm15645	-320
ENSMUSG00000086437	Gm13021	-2288
ENSMUSG00000086453	Gm11457	98
ENSMUSG00000086481	Gm11707	-2932
ENSMUSG00000086507	Gm11206	5591
ENSMUSG00000086527	Gm15856	-958
ENSMUSG00000086547	Gm11755	4218
ENSMUSG00000086561	Gm15540	15
ENSMUSG00000086589	Gm12915	31
ENSMUSG00000086589	Gm12915	3275
ENSMUSG00000086598	Gm13718	1322
ENSMUSG00000086628	Gm16157	305
ENSMUSG00000086738	Gm12154	-5337
ENSMUSG00000086769	Gm15587	-279
ENSMUSG00000086786	Gm15908	6843
ENSMUSG00000086786	Gm15908	54
ENSMUSG00000086789	Gm12228	-8644
ENSMUSG00000086833	Gm12440	-3412
ENSMUSG00000086849	Gm13840	6391
ENSMUSG00000086849	Gm13840	-735
ENSMUSG00000086868	Gm15883	-9163
ENSMUSG00000086897	4632428C04Rik	4641
ENSMUSG00000086924	Gm11766	598
ENSMUSG00000086950	Gm16907	2626
ENSMUSG00000087009	Nphs1as	-9624
ENSMUSG00000087065	Astx6	-2308
ENSMUSG00000087065	Astx6	367
ENSMUSG00000087065	Astx6	1652
ENSMUSG00000087090	Nctc1	-8114
ENSMUSG00000087091	4930509E16Rik	786
ENSMUSG00000087172	Gm12153	-8550
ENSMUSG00000087173	Gm11337	-82
ENSMUSG00000087190	D430001F17Rik	-2787
ENSMUSG00000087222	E030042O20Rik	528
ENSMUSG00000087241	Gm11844	-172
ENSMUSG00000087254	2310005A03Rik	8437
ENSMUSG00000087259	2610035D17Rik	7362
ENSMUSG00000087283	Gm13580	-980
ENSMUSG00000087295	Gm11193	-819
ENSMUSG00000087330	Gm11616	-5258
ENSMUSG00000087339	Gm11586	-25
ENSMUSG00000087347	1700047K16Rik	171
ENSMUSG00000087364	Gm13398	5351
ENSMUSG00000087385	AA415398	-111
ENSMUSG00000087413	Gm11266	610
ENSMUSG00000087446	4930578M01Rik	7360
ENSMUSG00000087477	Gm13822	-2698
ENSMUSG00000087528	9830144P21Rik	-2073
ENSMUSG00000087530	Gm15533	-4687
ENSMUSG00000087562	Gm16754	2128
ENSMUSG00000087638	Gm11773	-133
ENSMUSG00000087648	E130018N17Rik	-4763
ENSMUSG00000087683	Gm11712	-7459
ENSMUSG00000087683	Gm11712	-9479
ENSMUSG00000087728	7SK	-2575
ENSMUSG00000087767	5S_rRNA	2746
ENSMUSG00000087792	U6	4060
ENSMUSG00000087861	U7	3440
ENSMUSG00000087950	Mir1948	7526
ENSMUSG00000088018	U6	-5050
ENSMUSG00000088022	7SK	-8125
ENSMUSG00000088022	7SK	-8310
ENSMUSG00000088022	7SK	-8672
ENSMUSG00000088031	7SK	-6723
ENSMUSG00000088056	SNORA48	-6353
ENSMUSG00000088058	SNORA70	8770
ENSMUSG00000088086	7SK	2886
ENSMUSG00000088269	5S_rRNA	1132
ENSMUSG00000088317	7SK	6906
ENSMUSG00000088329	RNaseP_nuc	5385
ENSMUSG00000088384	5S_rRNA	-7838
ENSMUSG00000088487	7SK	-1539
ENSMUSG00000088559	Mir1981	-4878
ENSMUSG00000088562	7SK	5951
ENSMUSG00000088668	U6	-6956
ENSMUSG00000088672	U6atac	-263
ENSMUSG00000088836	SNORA48	943
ENSMUSG00000088887	U7	-2973
ENSMUSG00000088892	AL772376.1	903
ENSMUSG00000088913	U1	1044
ENSMUSG00000089077	U7	-9049
ENSMUSG00000089241	7SK	6201
ENSMUSG00000089290	U6	-3841
ENSMUSG00000089298	7SK	7490
ENSMUSG00000089324	Mir1936	-42
ENSMUSG00000089341	7SK	4301
ENSMUSG00000089422	U6	1044
ENSMUSG00000089449	SNORD112	2370
ENSMUSG00000089461	SNORA17	-1529
ENSMUSG00000089521	snosnR60_Z15	3989
ENSMUSG00000089544	AL603828.1	-8294
ENSMUSG00000089544	AL603828.1	-9259
ENSMUSG00000089590	U7	961
ENSMUSG00000089634	Nat8b	3867
ENSMUSG00000089634	Nat8b	5594
ENSMUSG00000089653	Gm15841	7944
ENSMUSG00000089678	Agxt2	47
ENSMUSG00000089680	Gm15722	-2403
ENSMUSG00000089712	Gm15889	-33
ENSMUSG00000089712	Gm15889	-240
ENSMUSG00000089744	Gm16146	-9521
ENSMUSG00000089762	Ier5l	9913
ENSMUSG00000089790	Gm16588	-3550
ENSMUSG00000089803	Gm10171	3139
ENSMUSG00000089842	Gm16338	-7318
ENSMUSG00000089851	Gm16579	7080
ENSMUSG00000089876	Tmem102	1738
ENSMUSG00000089937	Gm7281	-4380
ENSMUSG00000089941	Gm16168	4529
ENSMUSG00000089961	Gm16567	-2791
ENSMUSG00000089983	2010320O07Rik	-1709
ENSMUSG00000090002	Gm16006	3520
ENSMUSG00000090103	Gm16094	218
ENSMUSG00000090115	Usp49	-1245
ENSMUSG00000090128	Gm16038	5854
ENSMUSG00000090157	Gm16534	-9687
ENSMUSG00000090165	Ugt1a10	-8717
ENSMUSG00000090170	Tnfsf12	2837
ENSMUSG00000090189	Gm2666	-7192
ENSMUSG00000090230	Gm16315	2563
ENSMUSG00000090231	Cfb	-48
ENSMUSG00000090243	Gm16103	-6981
ENSMUSG00000090274	Gm17671	2174
ENSMUSG00000090311	Gm17327	1555
ENSMUSG00000090334	Gm17149	-6132
ENSMUSG00000090369	4933411K16Rik	-1764
ENSMUSG00000090418	Gm17585	371
ENSMUSG00000090468	Gm5331	997
ENSMUSG00000090468	Gm5331	-2329
ENSMUSG00000090605	E230013L22Rik	-4674
ENSMUSG00000090617	Gm17395	7147
ENSMUSG00000090622	A930033H14Rik	-5627
ENSMUSG00000090650	Gm11168	-1466
ENSMUSG00000090673	Gm340	-8512
ENSMUSG00000090706	Gm17233	7711
ENSMUSG00000090722	Gm8378	-8906
ENSMUSG00000090903	Gm17247	-4769
ENSMUSG00000090995	Gm17589	4831
ENSMUSG00000091024	Gm17351	7834
ENSMUSG00000091024	Gm17351	410
ENSMUSG00000091028	Gm10722	-35
ENSMUSG00000091078	Gm17218	8148
ENSMUSG00000091089	A930018M24Rik	1467
ENSMUSG00000091095	Gm17305	526
ENSMUSG00000091166	Tstd1	-137
ENSMUSG00000091191	Gm17334	-8413
ENSMUSG00000091232	Gm17394	-1815
ENSMUSG00000091247	Gm16529	6276
ENSMUSG00000091348	Gm13151	3171
ENSMUSG00000091366	Gm17040	218
ENSMUSG00000091366	Gm17040	505
ENSMUSG00000091588	Gm17279	-3902
ENSMUSG00000091614	Gm17657	6624
ENSMUSG00000091667	Gm17718	9429
ENSMUSG00000091673	Gm17525	-979
ENSMUSG00000091764	Zfp964	2174
ENSMUSG00000091821	Gm17503	-4493
ENSMUSG00000091821	Gm17503	-1845
ENSMUSG00000091821	Gm17503	1058
[truncated: 40 more rows]

## Sheet: Ontology E18.5 genes
Category	Term	Count	%	PValue	Genes	List Total	Pop Hits	Pop Total	Fold Enrichment	Bonferroni	Benjamini	FDR
KEGG_PATHWAY	mmu03320:PPAR signaling pathway	24	1.56148	1.40863e-08	ENSMUSG00000027513, ENSMUSG00000026003, ENSMUSG00000018796, ENSMUSG00000028607, ENSMUSG00000025203, ENSMUSG00000037071, ENSMUSG00000028240, ENSMUSG00000008348, ENSMUSG00000024900, ENSMUSG00000002289, ENSMUSG00000022383, ENSMUSG00000026170, ENSMUSG00000015846, ENSMUSG00000005681, ENSMUSG00000062742, ENSMUSG00000024981, ENSMUSG00000032083, ENSMUSG00000050445, ENSMUSG00000002944, ENSMUSG00000022878,…	447	79	5738	3.89975	2.56371e-06	2.56371e-06	1.73828e-05
KEGG_PATHWAY	mmu04610:Complement and coagulation cascades	20	1.30124	2.72974e-06	ENSMUSG00000072849, ENSMUSG00000033860, ENSMUSG00000021492, ENSMUSG00000026715, ENSMUSG00000033831, ENSMUSG00000024863, ENSMUSG00000024386, ENSMUSG00000037411, ENSMUSG00000022887, ENSMUSG00000022875, ENSMUSG00000038224, ENSMUSG00000037780, ENSMUSG00000028128, ENSMUSG00000026368, ENSMUSG00000073418, ENSMUSG00000022149, ENSMUSG00000027249, ENSMUSG00000059481, ENSMUSG00000024164, ENSMUSG00000028001	447	75	5738	3.42312	0.000496691	0.000248376	0.00336851
KEGG_PATHWAY	mmu00071:Fatty acid metabolism	14	0.910865	2.30347e-05	ENSMUSG00000026003, ENSMUSG00000018796, ENSMUSG00000028607, ENSMUSG00000010025, ENSMUSG00000027984, ENSMUSG00000025745, ENSMUSG00000029455, ENSMUSG00000036880, ENSMUSG00000055301, ENSMUSG00000028712, ENSMUSG00000024900, ENSMUSG00000035561, ENSMUSG00000024981, ENSMUSG00000059447	447	45	5738	3.99364	0.00418359	0.00139648	0.0284216
KEGG_PATHWAY	mmu04920:Adipocytokine signaling pathway	16	1.04099	0.00014338	ENSMUSG00000027513, ENSMUSG00000003068, ENSMUSG00000018796, ENSMUSG00000002944, ENSMUSG00000023947, ENSMUSG00000031537, ENSMUSG00000022878, ENSMUSG00000024900, ENSMUSG00000022383, ENSMUSG00000078650, ENSMUSG00000015846, ENSMUSG00000038894, ENSMUSG00000004040, ENSMUSG00000024981, ENSMUSG00000025199, ENSMUSG00000053113	447	67	5738	3.06548	0.0257594	0.00650302	0.17679
KEGG_PATHWAY	mmu00010:Glycolysis / Gluconeogenesis	15	0.975927	0.000594676	ENSMUSG00000027513, ENSMUSG00000024885, ENSMUSG00000063229, ENSMUSG00000010025, ENSMUSG00000079558, ENSMUSG00000025791, ENSMUSG00000029455, ENSMUSG00000035473, ENSMUSG00000055301, ENSMUSG00000020277, ENSMUSG00000035561, ENSMUSG00000041237, ENSMUSG00000078650, ENSMUSG00000028307, ENSMUSG00000057666	447	68	5738	2.83162	0.102609	0.0214199	0.731374
KEGG_PATHWAY	mmu00380:Tryptophan metabolism	11	0.71568	0.00073521	ENSMUSG00000032315, ENSMUSG00000035561, ENSMUSG00000000673, ENSMUSG00000010025, ENSMUSG00000027984, ENSMUSG00000025745, ENSMUSG00000029455, ENSMUSG00000026348, ENSMUSG00000027187, ENSMUSG00000026866, ENSMUSG00000057228	447	40	5738	3.53009	0.125285	0.0220625	0.903491
KEGG_PATHWAY	mmu00410:beta-Alanine metabolism	8	0.520494	0.000996305	ENSMUSG00000035561, ENSMUSG00000033427, ENSMUSG00000074064, ENSMUSG00000010025, ENSMUSG00000025745, ENSMUSG00000057880, ENSMUSG00000029455, ENSMUSG00000033308	447	22	5738	4.66789	0.165913	0.0255839	1.22254
KEGG_PATHWAY	mmu00250:Alanine, aspartate and glutamate metabolism	9	0.585556	0.00158662	ENSMUSG00000029752, ENSMUSG00000029246, ENSMUSG00000026272, ENSMUSG00000022546, ENSMUSG00000044005, ENSMUSG00000024866, ENSMUSG00000057880, ENSMUSG00000031672, ENSMUSG00000076441	447	30	5738	3.85101	0.250983	0.0354796	1.9404
KEGG_PATHWAY	mmu00120:Primary bile acid biosynthesis	6	0.390371	0.00432731	ENSMUSG00000026170, ENSMUSG00000022244, ENSMUSG00000028240, ENSMUSG00000030382, ENSMUSG00000021751, ENSMUSG00000050445	447	15	5738	5.13468	0.545828	0.0839623	5.21091
KEGG_PATHWAY	mmu00982:Drug metabolism	14	0.910865	0.00465401	ENSMUSG00000060407, ENSMUSG00000024885, ENSMUSG00000022445, ENSMUSG00000055301, ENSMUSG00000008540, ENSMUSG00000025479, ENSMUSG00000014372, ENSMUSG00000001663, ENSMUSG00000025197, ENSMUSG00000061740, ENSMUSG00000027890, ENSMUSG00000068086, ENSMUSG00000057933, ENSMUSG00000060613	447	75	5738	2.39618	0.57216	0.0813964	5.59399
KEGG_PATHWAY	mmu00350:Tyrosine metabolism	9	0.585556	0.00899232	ENSMUSG00000000326, ENSMUSG00000024885, ENSMUSG00000029445, ENSMUSG00000001670, ENSMUSG00000055301, ENSMUSG00000041653, ENSMUSG00000031672, ENSMUSG00000030630, ENSMUSG00000022821	447	39	5738	2.96231	0.806795	0.138823	10.5481
KEGG_PATHWAY	mmu00260:Glycine, serine and threonine metabolism	8	0.520494	0.00998318	ENSMUSG00000015970, ENSMUSG00000017453, ENSMUSG00000002769, ENSMUSG00000026272, ENSMUSG00000028179, ENSMUSG00000020150, ENSMUSG00000020258, ENSMUSG00000009614	447	32	5738	3.20917	0.838955	0.14116	11.6456
KEGG_PATHWAY	mmu05200:Pathways in cancer	38	2.47235	0.0101099	ENSMUSG00000009681, ENSMUSG00000026842, ENSMUSG00000026840, ENSMUSG00000031503, ENSMUSG00000028530, ENSMUSG00000024778, ENSMUSG00000026639, ENSMUSG00000020919, ENSMUSG00000037815, ENSMUSG00000010067, ENSMUSG00000034957, ENSMUSG00000054115, ENSMUSG00000028800, ENSMUSG00000027940, ENSMUSG00000058709, ENSMUSG00000031520, ENSMUSG00000023951, ENSMUSG00000015846, ENSMUSG00000032402, ENSMUSG00000056234,…	447	323	5738	1.5102	0.842663	0.132603	11.785
KEGG_PATHWAY	mmu00564:Glycerophospholipid metabolism	12	0.780742	0.0133129	ENSMUSG00000009646, ENSMUSG00000021759, ENSMUSG00000023019, ENSMUSG00000025137, ENSMUSG00000035237, ENSMUSG00000005615, ENSMUSG00000042632, ENSMUSG00000052151, ENSMUSG00000033852, ENSMUSG00000041653, ENSMUSG00000026922, ENSMUSG00000000301	447	67	5738	2.29911	0.912771	0.159896	15.2435
KEGG_PATHWAY	mmu00062:Fatty acid elongation in mitochondria	4	0.260247	0.0194398	ENSMUSG00000027984, ENSMUSG00000059447, ENSMUSG00000025745, ENSMUSG00000036880	447	8	5738	6.41834	0.971925	0.211949	21.5143
KEGG_PATHWAY	mmu00330:Arginine and proline metabolism	10	0.650618	0.0195935	ENSMUSG00000035561, ENSMUSG00000031173, ENSMUSG00000010025, ENSMUSG00000044005, ENSMUSG00000020150, ENSMUSG00000040706, ENSMUSG00000029455, ENSMUSG00000031672, ENSMUSG00000076441, ENSMUSG00000023262	447	53	5738	2.42202	0.972715	0.201554	21.6659
KEGG_PATHWAY	mmu00360:Phenylalanine metabolism	6	0.390371	0.0241632	ENSMUSG00000024885, ENSMUSG00000029445, ENSMUSG00000001670, ENSMUSG00000041653, ENSMUSG00000050114, ENSMUSG00000031672	447	22	5738	3.50092	0.988341	0.230385	26.0544
KEGG_PATHWAY	mmu00903:Limonene and pinene degradation	5	0.325309	0.0246725	ENSMUSG00000035561, ENSMUSG00000010025, ENSMUSG00000025745, ENSMUSG00000029455, ENSMUSG00000041653	447	15	5738	4.2789	0.989398	0.223218	26.5292
KEGG_PATHWAY	mmu00640:Propanoate metabolism	7	0.455433	0.0255014	ENSMUSG00000035561, ENSMUSG00000074064, ENSMUSG00000063229, ENSMUSG00000010025, ENSMUSG00000025745, ENSMUSG00000057880, ENSMUSG00000029455	447	30	5738	2.99523	0.990918	0.219207	27.2961
KEGG_PATHWAY	mmu00561:Glycerolipid metabolism	9	0.585556	0.0266941	ENSMUSG00000021759, ENSMUSG00000035561, ENSMUSG00000010025, ENSMUSG00000034371, ENSMUSG00000020258, ENSMUSG00000029455, ENSMUSG00000052151, ENSMUSG00000041653, ENSMUSG00000026922	447	47	5738	2.45809	0.992733	0.218248	28.3866
KEGG_PATHWAY	mmu00980:Metabolism of xenobiotics by cytochrome P450	11	0.71568	0.0298851	ENSMUSG00000008540, ENSMUSG00000001663, ENSMUSG00000025479, ENSMUSG00000032315, ENSMUSG00000052974, ENSMUSG00000025197, ENSMUSG00000024885, ENSMUSG00000027890, ENSMUSG00000057933, ENSMUSG00000060613, ENSMUSG00000055301	447	66	5738	2.13945	0.996002	0.231222	31.2306
KEGG_PATHWAY	mmu00310:Lysine degradation	8	0.520494	0.0365404	ENSMUSG00000035561, ENSMUSG00000017453, ENSMUSG00000041660, ENSMUSG00000010025, ENSMUSG00000027984, ENSMUSG00000025745, ENSMUSG00000029455, ENSMUSG00000057228	447	41	5738	2.50472	0.998858	0.265048	36.8313
KEGG_PATHWAY	mmu00270:Cysteine and methionine metabolism	7	0.455433	0.0391074	ENSMUSG00000020661, ENSMUSG00000033022, ENSMUSG00000071711, ENSMUSG00000063229, ENSMUSG00000001670, ENSMUSG00000028179, ENSMUSG00000031672	447	33	5738	2.72293	0.999297	0.270702	38.8771
KEGG_PATHWAY	mmu00340:Histidine metabolism	6	0.390371	0.0402687	ENSMUSG00000034456, ENSMUSG00000035561, ENSMUSG00000024885, ENSMUSG00000010025, ENSMUSG00000024866, ENSMUSG00000029455	447	25	5738	3.08081	0.999436	0.267791	39.7825
KEGG_PATHWAY	mmu05219:Bladder cancer	8	0.520494	0.0410361	ENSMUSG00000000303, ENSMUSG00000023951, ENSMUSG00000031520, ENSMUSG00000054252, ENSMUSG00000020122, ENSMUSG00000059552, ENSMUSG00000016477, ENSMUSG00000010067	447	42	5738	2.44508	0.999512	0.26291	40.374
KEGG_PATHWAY	mmu05212:Pancreatic cancer	11	0.71568	0.0503227	ENSMUSG00000023951, ENSMUSG00000031520, ENSMUSG00000032402, ENSMUSG00000028530, ENSMUSG00000004040, ENSMUSG00000020122, ENSMUSG00000025199, ENSMUSG00000059552, ENSMUSG00000031537, ENSMUSG00000016477, ENSMUSG00000033220	447	72	5738	1.96116	0.999917	0.303321	47.1209
KEGG_PATHWAY	mmu00565:Ether lipid metabolism	7	0.455433	0.0503314	ENSMUSG00000009646, ENSMUSG00000021759, ENSMUSG00000037366, ENSMUSG00000042632, ENSMUSG00000052151, ENSMUSG00000033852, ENSMUSG00000026922	447	35	5738	2.56734	0.999917	0.293976	47.1269
KEGG_PATHWAY	mmu00280:Valine, leucine and isoleucine degradation	8	0.520494	0.0625257	ENSMUSG00000035561, ENSMUSG00000010025, ENSMUSG00000027984, ENSMUSG00000059447, ENSMUSG00000025745, ENSMUSG00000057880, ENSMUSG00000029455, ENSMUSG00000036880	447	46	5738	2.23247	0.999992	0.342742	54.9211
KEGG_PATHWAY	mmu00650:Butanoate metabolism	7	0.455433	0.0633417	ENSMUSG00000035561, ENSMUSG00000010025, ENSMUSG00000027984, ENSMUSG00000025745, ENSMUSG00000057880, ENSMUSG00000029455, ENSMUSG00000046598	447	37	5738	2.42856	0.999993	0.336796	55.403
KEGG_PATHWAY	mmu05220:Chronic myeloid leukemia	11	0.71568	0.0681886	ENSMUSG00000009681, ENSMUSG00000028800, ENSMUSG00000026842, ENSMUSG00000032402, ENSMUSG00000020919, ENSMUSG00000037373, ENSMUSG00000025199, ENSMUSG00000059552, ENSMUSG00000031537, ENSMUSG00000016477, ENSMUSG00000040525	447	76	5738	1.85794	0.999997	0.348487	58.1687
KEGG_PATHWAY	mmu05216:Thyroid cancer	6	0.390371	0.0699193	ENSMUSG00000000303, ENSMUSG00000027940, ENSMUSG00000015846, ENSMUSG00000056234, ENSMUSG00000059552, ENSMUSG00000024985	447	29	5738	2.65587	0.999998	0.34659	59.1175
KEGG_PATHWAY	mmu00620:Pyruvate metabolism	7	0.455433	0.0947497	ENSMUSG00000021620, ENSMUSG00000035561, ENSMUSG00000027513, ENSMUSG00000041237, ENSMUSG00000063229, ENSMUSG00000010025, ENSMUSG00000029455	447	41	5738	2.19163	1	0.432296	70.7237

## Sheet: HNF4A depleted down-genes
Ensembl Gene ID	Associated Gene Name
ENSMUSG00000054676	1600014C10Rik
ENSMUSG00000078612	1700024P16Rik
ENSMUSG00000037263	1700055N04Rik
ENSMUSG00000086771	1700080G11Rik
ENSMUSG00000036027	1810046K07Rik
ENSMUSG00000073155	1810058I24Rik
ENSMUSG00000037145	2210407C18Rik
ENSMUSG00000053613	4732444A12Rik
ENSMUSG00000021185	9030617O03Rik
ENSMUSG00000053168	9030619P08Rik
ENSMUSG00000040139	9430038I01Rik
ENSMUSG00000022347	A1bg
ENSMUSG00000038884	A230050P20Rik
ENSMUSG00000040505	Abcg5
ENSMUSG00000002475	Abhd3
ENSMUSG00000043587	Acpl2
ENSMUSG00000024981	Acsl5
ENSMUSG00000037797	Adh4
ENSMUSG00000050541	Adra1b
ENSMUSG00000029369	Afm
ENSMUSG00000026272	Agxt
ENSMUSG00000089678	Agxt2
ENSMUSG00000035875	AI182371
ENSMUSG00000038522	AI317395
ENSMUSG00000046312	AI464131
ENSMUSG00000020085	Aifm2
ENSMUSG00000019866	Aim1
ENSMUSG00000028792	Ak2
ENSMUSG00000033715	Akr1c14
ENSMUSG00000021214	Akr1c18
ENSMUSG00000021210	Akr1c6
ENSMUSG00000038641	Akr1d1
ENSMUSG00000037542	Aldh8a1
ENSMUSG00000028553	Angptl3
ENSMUSG00000022237	Ankrd33b
ENSMUSG00000050914	Ankrd37
ENSMUSG00000032080	Apoa4
ENSMUSG00000032079	Apoa5
ENSMUSG00000024411	Aqp4
ENSMUSG00000040964	Arhgef10l
ENSMUSG00000029032	Arhgef16
ENSMUSG00000045094	Arhgef37
ENSMUSG00000051517	Arhgef39
ENSMUSG00000037686	Aspg
ENSMUSG00000028550	Atg4c
ENSMUSG00000078584	AU022252
ENSMUSG00000020123	Avpr1a
ENSMUSG00000075010	AW112010
ENSMUSG00000047728	BC025446
ENSMUSG00000074639	BC089597
ENSMUSG00000028167	Bdh2
ENSMUSG00000074768	Bhmt
ENSMUSG00000023175	Bsg
ENSMUSG00000021900	Btd
ENSMUSG00000045975	C2cd2
ENSMUSG00000035031	C8a
ENSMUSG00000026509	Capn2
ENSMUSG00000027559	Car3
ENSMUSG00000025317	Car5a
ENSMUSG00000039648	Ccbl1
ENSMUSG00000070348	Ccnd1
ENSMUSG00000028076	Cd1d1
ENSMUSG00000035498	Cdcp1
ENSMUSG00000026437	Cdk18
ENSMUSG00000037664	Cdkn1c
ENSMUSG00000074272	Ceacam1
ENSMUSG00000052435	Cebpe
ENSMUSG00000068101	Cenpm
ENSMUSG00000062181	Ces3b
ENSMUSG00000015970	Chdh
ENSMUSG00000070473	Cldn3
ENSMUSG00000030364	Clec2h
ENSMUSG00000021097	Clmn
ENSMUSG00000016756	Cmah
ENSMUSG00000033634	Cml2
ENSMUSG00000020173	Cobl
ENSMUSG00000000326	Comt
ENSMUSG00000023176	Cpn2
ENSMUSG00000037942	Crp
ENSMUSG00000029352	Crybb3
ENSMUSG00000030470	Csrp3
ENSMUSG00000026870	Cutal
ENSMUSG00000046213	Cym
ENSMUSG00000040660	Cyp2b9
ENSMUSG00000022445	Cyp2d26
ENSMUSG00000025479	Cyp2e1
ENSMUSG00000052520	Cyp2j5
ENSMUSG00000024292	Cyp4f14
ENSMUSG00000052117	D630039A03Rik
ENSMUSG00000032380	Dapk2
ENSMUSG00000032500	Dclk3
ENSMUSG00000031285	Dcx
ENSMUSG00000063428	Ddo
ENSMUSG00000025815	Dhtkd1
ENSMUSG00000034785	Dio1
ENSMUSG00000040658	Dnph1
ENSMUSG00000035000	Dpp4
ENSMUSG00000033308	Dpyd
ENSMUSG00000024331	Dsc2
ENSMUSG00000020125	Elane
ENSMUSG00000022425	Enpp2
ENSMUSG00000026235	Epha4
ENSMUSG00000019768	Esr1
ENSMUSG00000010663	Fads1
ENSMUSG00000024665	Fads2
ENSMUSG00000006218	Fam131c
ENSMUSG00000074071	Fam169b
ENSMUSG00000027495	Fam210b
ENSMUSG00000026858	Fam73b
ENSMUSG00000051225	Fam83a
ENSMUSG00000030827	Fgf21
ENSMUSG00000025175	Fn3k
ENSMUSG00000001334	Fndc5
ENSMUSG00000061175	Fnip2
ENSMUSG00000025466	Fuom
ENSMUSG00000039809	Gabbr2
ENSMUSG00000046814	Gchfr
ENSMUSG00000059434	Gckr
ENSMUSG00000021360	Gcnt2
ENSMUSG00000058624	Gda
ENSMUSG00000040471	Ggt6
ENSMUSG00000027454	Gins1
ENSMUSG00000044005	Gls2
ENSMUSG00000057802	Gm10030
ENSMUSG00000087404	Gm11752
ENSMUSG00000084819	Gm11967
ENSMUSG00000081223	Gm12247
ENSMUSG00000085132	Gm12265
ENSMUSG00000087613	Gm13855
ENSMUSG00000081988	Gm15746
ENSMUSG00000086628	Gm16157
ENSMUSG00000091730	Gm17230
ENSMUSG00000073555	Gm4951
ENSMUSG00000071633	Gm4952
ENSMUSG00000091742	Gm5093
ENSMUSG00000074623	Gm826
ENSMUSG00000002769	Gnmt
ENSMUSG00000031119	Gpc4
ENSMUSG00000041293	Gpr110
ENSMUSG00000022546	Gpt
ENSMUSG00000025934	Gsta3
ENSMUSG00000001663	Gstt1
ENSMUSG00000001665	Gstt3
ENSMUSG00000079507	H2-Q1
ENSMUSG00000000673	Haao
ENSMUSG00000027261	Hao1
ENSMUSG00000027870	Hao2
ENSMUSG00000019853	Hebp2
ENSMUSG00000038403	Hfe2
ENSMUSG00000025813	Homer2
ENSMUSG00000029445	Hpd
ENSMUSG00000037406	Htra4
ENSMUSG00000046070	Igfals
ENSMUSG00000006538	Ihh
ENSMUSG00000017057	Il13ra1
ENSMUSG00000037035	Inhbb
ENSMUSG00000003477	Inmt
ENSMUSG00000038695	Josd2
ENSMUSG00000024694	Keg1
ENSMUSG00000022332	Khdrbs3
ENSMUSG00000029162	Khk
ENSMUSG00000066513	Klk1b4
ENSMUSG00000031640	Klkb1
ENSMUSG00000060459	Kng2
ENSMUSG00000025762	Larp1b
ENSMUSG00000031958	Ldhd
ENSMUSG00000036216	Leap2
ENSMUSG00000042363	Lgalsl
ENSMUSG00000030946	Lhpp
ENSMUSG00000019906	Lin7a
ENSMUSG00000053846	Lipg
ENSMUSG00000026623	Lpgat1
ENSMUSG00000020105	Lrig3
ENSMUSG00000045776	Lrtm1
ENSMUSG00000075602	Ly6a
ENSMUSG00000022587	Ly6e
ENSMUSG00000037780	Mbl1
ENSMUSG00000026355	Mcm6
ENSMUSG00000025347	Mettl7b
ENSMUSG00000068587	Mgam
ENSMUSG00000022613	Miox
ENSMUSG00000035852	Misp
ENSMUSG00000039533	Mmd2
ENSMUSG00000023861	Mpc1
ENSMUSG00000022574	Naprt1
ENSMUSG00000004558	Ndrg2
ENSMUSG00000034413	Neurl1b
ENSMUSG00000040998	Npnt
ENSMUSG00000037583	Nr0b2
ENSMUSG00000055254	Ntrk2
ENSMUSG00000039196	Orm1
ENSMUSG00000038150	Ormdl3
ENSMUSG00000022906	Parp9
ENSMUSG00000041650	Pcca
ENSMUSG00000041119	Pde9a
ENSMUSG00000068221	Pdxp
ENSMUSG00000038298	Pdzk1
ENSMUSG00000035357	Pdzrn3
ENSMUSG00000026189	Pecr
ENSMUSG00000019851	Perp
ENSMUSG00000020003	Pex7
ENSMUSG00000020277	Pfkl
ENSMUSG00000045658	Pid1
ENSMUSG00000017453	Pipox
ENSMUSG00000026413	Pkp1
ENSMUSG00000046971	Pla2g4f
ENSMUSG00000029322	Plac8
ENSMUSG00000038167	Plekhg6
ENSMUSG00000059481	Plg
ENSMUSG00000016382	Pls3
ENSMUSG00000032372	Plscr2
ENSMUSG00000028066	Pmf1
ENSMUSG00000018868	Pnpla5
ENSMUSG00000046794	Ppp1r3b
ENSMUSG00000067279	Ppp1r3c
ENSMUSG00000006014	Prg4
ENSMUSG00000028518	Prkaa2
ENSMUSG00000005268	Prlr
ENSMUSG00000073600	Prob1
ENSMUSG00000070368	Prok1
ENSMUSG00000026730	Pter
ENSMUSG00000028036	Ptgfr
ENSMUSG00000038751	Ptk6
ENSMUSG00000033684	Qsox1
ENSMUSG00000026304	Rab17
ENSMUSG00000040146	Rgl3
ENSMUSG00000070730	Rmdn3
ENSMUSG00000037991	Rmi2
ENSMUSG00000047496	Rnf152
ENSMUSG00000028150	Rorc
ENSMUSG00000018449	Rpain
ENSMUSG00000041959	S100a10
ENSMUSG00000045087	S1pr5
ENSMUSG00000074115	Saa1
ENSMUSG00000047735	Samd9l
ENSMUSG00000037071	Scd1
ENSMUSG00000046480	Scn4b
ENSMUSG00000040127	Sdr9c7
ENSMUSG00000029596	Sdsl
ENSMUSG00000003585	Sec14l2
ENSMUSG00000026589	Sec16b
ENSMUSG00000021091	Serpina3n
ENSMUSG00000037541	Shank2
ENSMUSG00000025494	Sigirr
ENSMUSG00000021135	Slc10a1
ENSMUSG00000023073	Slc10a2
ENSMUSG00000018459	Slc13a3
ENSMUSG00000029843	Slc13a4
ENSMUSG00000033147	Slc22a15
ENSMUSG00000040966	Slc22a2
ENSMUSG00000053303	Slc22a26
ENSMUSG00000067656	Slc22a27
ENSMUSG00000067144	Slc22a7
ENSMUSG00000024818	Slc25a45
ENSMUSG00000030382	Slc27a5
ENSMUSG00000026614	Slc30a10
ENSMUSG00000033114	Slc35d2
ENSMUSG00000007034	Slc44a4
ENSMUSG00000026435	Slc45a3
ENSMUSG00000024485	Slc4a9
ENSMUSG00000031906	Smpd3
ENSMUSG00000033594	Spata2l
ENSMUSG00000024503	Spink3
ENSMUSG00000024427	Spry4
ENSMUSG00000005803	Sqrdl
ENSMUSG00000038541	Srd5a2
ENSMUSG00000020538	Srebf1
ENSMUSG00000013846	St3gal1
ENSMUSG00000006800	Sulf2
ENSMUSG00000023122	Sult1c2
ENSMUSG00000029273	Sult1d1
ENSMUSG00000078799	Sult2a5
ENSMUSG00000000739	Sult5a1
ENSMUSG00000036863	Syde2
ENSMUSG00000019737	Syne4
ENSMUSG00000035686	Thrsp
ENSMUSG00000040413	Timd2
ENSMUSG00000062545	Tlr12
ENSMUSG00000036151	Tm6sf2
ENSMUSG00000026188	Tmem169
ENSMUSG00000028420	Tmem38b
ENSMUSG00000010307	Tmem86a
ENSMUSG00000045282	Tmem86b
ENSMUSG00000016942	Tmprss6
ENSMUSG00000044469	Tnfaip8l1
ENSMUSG00000054226	Tprkb
ENSMUSG00000043091	Tuba1c
ENSMUSG00000000811	Txnrd3
ENSMUSG00000022615	Tymp
ENSMUSG00000001891	Ugp2
ENSMUSG00000072664	Ugt3a1
ENSMUSG00000049152	Ugt3a2
ENSMUSG00000002058	Unc119
ENSMUSG00000024066	Xdh
ENSMUSG00000027514	Zbp1
ENSMUSG00000027016	Zfp385b

## Sheet: Ontology HNF4A-depleted genes
Category	code	Term	Count	%	PValue	Genes	List Total	Pop Hits	Pop Total	Fold Enrichment	Bonferroni	Benjamini	FDR
GOTERM_BP_ALL	GO:0055114	oxidation reduction	38	13.240418118466899	4.1774677598386406E-13	ENSMUSG00000021210, ENSMUSG00000063428, ENSMUSG00000074639, ENSMUSG00000037071, ENSMUSG00000037542, ENSMUSG00000033308, ENSMUSG00000034785, ENSMUSG00000000673, ENSMUSG00000010663, ENSMUSG00000037263, ENSMUSG00000033715, ENSMUSG00000021214, ENSMUSG00000038641, ENSMUSG00000017453, ENSMUSG00000022613, ENSMUSG00000024292, ENSMUSG00000029445, ENSMUSG00000022445, ENSMUSG00000000811, ENSMUSG00000040660,…	198	672	14219	4.060861592111592	5.523010937480421E-10	5.523010937480421E-10	6.835421118012164E-10
GOTERM_BP_ALL	GO:0043436	oxoacid metabolic process	23	8.013937282229964	8.340664321159194E-7	ENSMUSG00000063428, ENSMUSG00000020003, ENSMUSG00000017453, ENSMUSG00000038641, ENSMUSG00000026272, ENSMUSG00000002769, ENSMUSG00000037686, ENSMUSG00000029445, ENSMUSG00000037071, ENSMUSG00000037542, ENSMUSG00000028167, ENSMUSG00000074768, ENSMUSG00000015970, ENSMUSG00000024665, ENSMUSG00000028518, ENSMUSG00000016756, ENSMUSG00000026189, ENSMUSG00000044005, ENSMUSG00000010663, ENSMUSG00000024981,…	198	479	14219	3.4482296872693534	0.0011020286031127036	5.511661936429268E-4	0.001364642859713605
GOTERM_BP_ALL	GO:0019752	carboxylic acid metabolic process	23	8.013937282229964	8.340664321159194E-7	ENSMUSG00000063428, ENSMUSG00000020003, ENSMUSG00000017453, ENSMUSG00000038641, ENSMUSG00000026272, ENSMUSG00000002769, ENSMUSG00000037686, ENSMUSG00000029445, ENSMUSG00000037071, ENSMUSG00000037542, ENSMUSG00000028167, ENSMUSG00000074768, ENSMUSG00000015970, ENSMUSG00000024665, ENSMUSG00000028518, ENSMUSG00000016756, ENSMUSG00000026189, ENSMUSG00000044005, ENSMUSG00000010663, ENSMUSG00000024981,…	198	479	14219	3.4482296872693534	0.0011020286031127036	5.511661936429268E-4	0.001364642859713605
GOTERM_BP_ALL	GO:0006082	organic acid metabolic process	23	8.013937282229964	8.636434304566534E-7	ENSMUSG00000063428, ENSMUSG00000020003, ENSMUSG00000017453, ENSMUSG00000038641, ENSMUSG00000026272, ENSMUSG00000002769, ENSMUSG00000037686, ENSMUSG00000029445, ENSMUSG00000037071, ENSMUSG00000037542, ENSMUSG00000028167, ENSMUSG00000074768, ENSMUSG00000015970, ENSMUSG00000024665, ENSMUSG00000028518, ENSMUSG00000016756, ENSMUSG00000026189, ENSMUSG00000044005, ENSMUSG00000010663, ENSMUSG00000024981,…	198	480	14219	3.4410458754208753	0.0011410855742373105	3.8050662500688226E-4	0.0014130344149210217
GOTERM_BP_ALL	GO:0042180	cellular ketone metabolic process	23	8.013937282229964	1.2588506632104659E-6	ENSMUSG00000063428, ENSMUSG00000020003, ENSMUSG00000017453, ENSMUSG00000038641, ENSMUSG00000026272, ENSMUSG00000002769, ENSMUSG00000037686, ENSMUSG00000029445, ENSMUSG00000037071, ENSMUSG00000037542, ENSMUSG00000028167, ENSMUSG00000074768, ENSMUSG00000015970, ENSMUSG00000024665, ENSMUSG00000028518, ENSMUSG00000016756, ENSMUSG00000026189, ENSMUSG00000044005, ENSMUSG00000010663, ENSMUSG00000024981,…	198	491	14219	3.3639552346273325	0.001662817608525713	4.159638690769407E-4	0.0020596392540150887
GOTERM_BP_ALL	GO:0006629	lipid metabolic process	27	9.40766550522648	3.870361042657212E-6	ENSMUSG00000021210, ENSMUSG00000020003, ENSMUSG00000037686, ENSMUSG00000053846, ENSMUSG00000037071, ENSMUSG00000037542, ENSMUSG00000020538, ENSMUSG00000074115, ENSMUSG00000028518, ENSMUSG00000010663, ENSMUSG00000024981, ENSMUSG00000021214, ENSMUSG00000031906, ENSMUSG00000038641, ENSMUSG00000018868, ENSMUSG00000046971, ENSMUSG00000019768, ENSMUSG00000028167, ENSMUSG00000038541, ENSMUSG00000024665,…	198	696	14219	2.7858542319749215	0.005103559559958448	0.0010228020210790723	0.006332274249043479
GOTERM_BP_ALL	GO:0032787	monocarboxylic acid metabolic process	15	5.2264808362369335	2.2269928507673603E-5	ENSMUSG00000020003, ENSMUSG00000038641, ENSMUSG00000017453, ENSMUSG00000026272, ENSMUSG00000037071, ENSMUSG00000037542, ENSMUSG00000028167, ENSMUSG00000024665, ENSMUSG00000028518, ENSMUSG00000026189, ENSMUSG00000010663, ENSMUSG00000024981, ENSMUSG00000030382, ENSMUSG00000025317, ENSMUSG00000027870	198	268	14219	4.0193916779737675	0.02901200403360138	0.004894843237231106	0.036430546417809406
GOTERM_BP_ALL	GO:0008152	metabolic process	127	44.25087108013937	2.30742583122848E-5	ENSMUSG00000063428, ENSMUSG00000020125, ENSMUSG00000034413, ENSMUSG00000028150, ENSMUSG00000031640, ENSMUSG00000033308, ENSMUSG00000033634, ENSMUSG00000032500, ENSMUSG00000026437, ENSMUSG00000035000, ENSMUSG00000026730, ENSMUSG00000027454, ENSMUSG00000070368, ENSMUSG00000006800, ENSMUSG00000010663, ENSMUSG00000037263, ENSMUSG00000066513, ENSMUSG00000030946, ENSMUSG00000028066, ENSMUSG00000017453,…	198	7020	14219	1.2991834297389853	0.03004395352600897	0.0043483073910879355	0.0377460864018464
GOTERM_BP_ALL	GO:0016042	lipid catabolic process	10	3.484320557491289	1.0290080579456507E-4	ENSMUSG00000038541, ENSMUSG00000038641, ENSMUSG00000020003, ENSMUSG00000018868, ENSMUSG00000053846, ENSMUSG00000037686, ENSMUSG00000046971, ENSMUSG00000022425, ENSMUSG00000021214, ENSMUSG00000028167	198	134	14219	5.359188903965023	0.12719390811921416	0.0168614602395184	0.16822739123200092
GOTERM_BP_ALL	GO:0002526	acute inflammatory response	8	2.7874564459930316	1.288173122670453E-4	ENSMUSG00000074115, ENSMUSG00000035875, ENSMUSG00000037780, ENSMUSG00000025494, ENSMUSG00000035031, ENSMUSG00000021091, ENSMUSG00000039196, ENSMUSG00000037942	198	81	14219	7.092654944506798	0.15659453361776754	0.01874513379007381	0.21055508658617272
GOTERM_BP_ALL	GO:0006066	alcohol metabolic process	16	5.574912891986063	1.5110811941906579E-4	ENSMUSG00000046794, ENSMUSG00000000326, ENSMUSG00000002769, ENSMUSG00000022613, ENSMUSG00000022587, ENSMUSG00000025815, ENSMUSG00000020538, ENSMUSG00000020277, ENSMUSG00000025175, ENSMUSG00000015970, ENSMUSG00000074115, ENSMUSG00000067279, ENSMUSG00000028518, ENSMUSG00000016756, ENSMUSG00000037797, ENSMUSG00000025317	198	360	14219	3.1916947250280585	0.18108912963504453	0.019779764873401273	0.24694769067772349
GOTERM_BP_ALL	GO:0006519	cellular amino acid and derivative metabolic process	14	4.878048780487805	2.5776274566767184E-4	ENSMUSG00000063428, ENSMUSG00000000326, ENSMUSG00000026272, ENSMUSG00000002769, ENSMUSG00000037686, ENSMUSG00000029445, ENSMUSG00000000811, ENSMUSG00000040471, ENSMUSG00000022587, ENSMUSG00000015970, ENSMUSG00000074768, ENSMUSG00000001663, ENSMUSG00000001665, ENSMUSG00000044005	198	297	14219	3.385130768969153	0.28880332873400105	0.030507353007972027	0.4209026776183067
GOTERM_BP_ALL	GO:0006790	sulfur metabolic process	8	2.7874564459930316	3.259888301511948E-4	ENSMUSG00000074768, ENSMUSG00000001663, ENSMUSG00000029273, ENSMUSG00000001665, ENSMUSG00000002769, ENSMUSG00000006800, ENSMUSG00000000811, ENSMUSG00000040471	198	94	14219	6.111755856436708	0.35015895512932715	0.035281526677035324	0.5320308350315384
GOTERM_BP_ALL	GO:0006952	defense response	17	5.923344947735192	5.115982977359193E-4	ENSMUSG00000036216, ENSMUSG00000020125, ENSMUSG00000062545, ENSMUSG00000079507, ENSMUSG00000028076, ENSMUSG00000031640, ENSMUSG00000039196, ENSMUSG00000052435, ENSMUSG00000074115, ENSMUSG00000035875, ENSMUSG00000037780, ENSMUSG00000025494, ENSMUSG00000035031, ENSMUSG00000030364, ENSMUSG00000021091, ENSMUSG00000032080, ENSMUSG00000037942	198	448	14219	2.725051857864358	0.4916097989910907	0.0507080842629134	0.8337666704096192
GOTERM_BP_ALL	GO:0006953	acute-phase response	5	1.7421602787456445	7.386025778513503E-4	ENSMUSG00000074115, ENSMUSG00000025494, ENSMUSG00000021091, ENSMUSG00000039196, ENSMUSG00000037942	198	30	14219	11.968855218855218	0.6234834907362661	0.06739259638473294	1.201627723805354
GOTERM_BP_ALL	GO:0006631	fatty acid metabolic process	10	3.484320557491289	0.001067013973289498	ENSMUSG00000024665, ENSMUSG00000020003, ENSMUSG00000028518, ENSMUSG00000010663, ENSMUSG00000026189, ENSMUSG00000037071, ENSMUSG00000024981, ENSMUSG00000030382, ENSMUSG00000028167, ENSMUSG00000027870	198	184	14219	3.9028875713658318	0.7561850076555123	0.08979889067133084	1.7315523427595902
GOTERM_BP_ALL	GO:0044255	cellular lipid metabolic process	17	5.923344947735192	0.0011141671002035504	ENSMUSG00000020003, ENSMUSG00000037686, ENSMUSG00000046971, ENSMUSG00000037071, ENSMUSG00000037542, ENSMUSG00000028167, ENSMUSG00000024665, ENSMUSG00000028518, ENSMUSG00000032079, ENSMUSG00000026189, ENSMUSG00000010663, ENSMUSG00000024981, ENSMUSG00000030382, ENSMUSG00000028553, ENSMUSG00000031906, ENSMUSG00000027870, ENSMUSG00000026623	198	482	14219	2.532828282828283	0.7709351346939846	0.08799460997290631	1.8074191724619437
GOTERM_BP_ALL	GO:0006081	cellular aldehyde metabolic process	4	1.3937282229965158	0.0015433399824921817	ENSMUSG00000026272, ENSMUSG00000037263, ENSMUSG00000037797, ENSMUSG00000037542	198	17	14219	16.897207367795605	0.8702144120260491	0.11317719811512816	2.4954115693448076
GOTERM_BP_ALL	GO:0008202	steroid metabolic process	9	3.1358885017421603	0.0018196219457272131	ENSMUSG00000020538, ENSMUSG00000021210, ENSMUSG00000038541, ENSMUSG00000074115, ENSMUSG00000038641, ENSMUSG00000028518, ENSMUSG00000019768, ENSMUSG00000030382, ENSMUSG00000021214	198	161	14219	4.0143986448334275	0.9099807243499648	0.12520250943130784	2.935912409582375
GOTERM_BP_ALL	GO:0042730	fibrinolysis	3	1.0452961672473868	0.0018580595750121618	ENSMUSG00000016942, ENSMUSG00000031640, ENSMUSG00000059481	198	5	14219	43.08787878787879	0.9144487455683596	0.12137938568625084	2.9970486662034723
GOTERM_BP_ALL	GO:0010817	regulation of hormone levels	8	2.7874564459930316	0.002030450244849216	ENSMUSG00000038541, ENSMUSG00000063428, ENSMUSG00000019768, ENSMUSG00000037542, ENSMUSG00000022587, ENSMUSG00000021214, ENSMUSG00000034785, ENSMUSG00000031906	198	128	14219	4.488320707070708	0.9319140254970556	0.1257152907423854	3.270797028005168
GOTERM_BP_ALL	GO:0030195	negative regulation of blood coagulation	3	1.0452961672473868	0.0027616886283971746	ENSMUSG00000016942, ENSMUSG00000031640, ENSMUSG00000059481	198	6	14219	35.906565656565654	0.9741644302655307	0.1597832494252831	4.4239262935064865
GOTERM_BP_ALL	GO:0009066	aspartate family amino acid metabolic process	4	1.3937282229965158	0.0033217451784397626	ENSMUSG00000074768, ENSMUSG00000063428, ENSMUSG00000002769, ENSMUSG00000037686	198	22	14219	13.056932966023878	0.9877061579176045	0.18121925762890978	5.298368085617911
GOTERM_BP_ALL	GO:0006575	cellular amino acid derivative metabolic process	8	2.7874564459930316	0.003494100107272867	ENSMUSG00000015970, ENSMUSG00000001663, ENSMUSG00000000326, ENSMUSG00000001665, ENSMUSG00000002769, ENSMUSG00000000811, ENSMUSG00000040471, ENSMUSG00000022587	198	141	14219	4.074503904291139	0.9902187614673028	0.18224008293111893	5.565958522879777
GOTERM_BP_ALL	GO:0046394	carboxylic acid biosynthetic process	8	2.7874564459930316	0.003494100107272867	ENSMUSG00000074768, ENSMUSG00000024665, ENSMUSG00000038641, ENSMUSG00000026272, ENSMUSG00000028518, ENSMUSG00000010663, ENSMUSG00000026189, ENSMUSG00000037071	198	141	14219	4.074503904291139	0.9902187614673028	0.18224008293111893	5.565958522879777
GOTERM_BP_ALL	GO:0016053	organic acid biosynthetic process	8	2.7874564459930316	0.003494100107272867	ENSMUSG00000074768, ENSMUSG00000024665, ENSMUSG00000038641, ENSMUSG00000026272, ENSMUSG00000028518, ENSMUSG00000010663, ENSMUSG00000026189, ENSMUSG00000037071	198	141	14219	4.074503904291139	0.9902187614673028	0.18224008293111893	5.565958522879777
GOTERM_BP_ALL	GO:0006954	inflammatory response	10	3.484320557491289	0.004178791216524971	ENSMUSG00000074115, ENSMUSG00000035875, ENSMUSG00000037780, ENSMUSG00000062545, ENSMUSG00000025494, ENSMUSG00000035031, ENSMUSG00000031640, ENSMUSG00000021091, ENSMUSG00000039196, ENSMUSG00000037942	198	225	14219	3.191694725028058	0.996057486532115	0.20599381992377952	6.621983287845545
GOTERM_BP_ALL	GO:0006749	glutathione metabolic process	4	1.3937282229965158	0.004277934317103969	ENSMUSG00000001663, ENSMUSG00000001665, ENSMUSG00000000811, ENSMUSG00000040471	198	24	14219	11.96885521885522	0.9965437135789624	0.20284203648904342	6.7739732301080435
GOTERM_BP_ALL	GO:0045834	positive regulation of lipid metabolic process	4	1.3937282229965158	0.004277934317103969	ENSMUSG00000020538, ENSMUSG00000003585, ENSMUSG00000028553, ENSMUSG00000066513	198	24	14219	11.96885521885522	0.9965437135789624	0.20284203648904342	6.7739732301080435
GOTERM_BP_ALL	GO:0006725	cellular aromatic compound metabolic process	7	2.4390243902439024	0.005072529837292327	ENSMUSG00000000326, ENSMUSG00000022615, ENSMUSG00000017453, ENSMUSG00000002769, ENSMUSG00000029445, ENSMUSG00000022587, ENSMUSG00000033308	198	114	14219	4.409578238525607	0.998797015924565	0.2278488848160145	7.983753236560465
GOTERM_BP_ALL	GO:0040007	growth	9	3.1358885017421603	0.005505275240854327	ENSMUSG00000027454, ENSMUSG00000006538, ENSMUSG00000005268, ENSMUSG00000037035, ENSMUSG00000019768, ENSMUSG00000031285, ENSMUSG00000022587, ENSMUSG00000059481, ENSMUSG00000050541	198	193	14219	3.348798869524258	0.9993231638412782	0.23684895731945077	8.6363973665184
GOTERM_BP_ALL	GO:0006706	steroid catabolic process	3	1.0452961672473868	0.006448876983963802	ENSMUSG00000038541, ENSMUSG00000038641, ENSMUSG00000021214	198	9	14219	23.93771043771044	0.9998070392600897	0.26321940854988957	10.044448646124426
GOTERM_BP_ALL	GO:0050819	negative regulation of coagulation	3	1.0452961672473868	0.006448876983963802	ENSMUSG00000016942, ENSMUSG00000031640, ENSMUSG00000059481	198	9	14219	23.93771043771044	0.9998070392600897	0.26321940854988957	10.044448646124426
GOTERM_BP_ALL	GO:0035023	regulation of Rho protein signal transduction	6	2.0905923344947737	0.006829231064479629	ENSMUSG00000029032, ENSMUSG00000051517, ENSMUSG00000038167, ENSMUSG00000040964, ENSMUSG00000045094, ENSMUSG00000050541	198	86	14219	5.0102184637068365	0.9998836854646477	0.26830142951440983	10.60623406336141
GOTERM_BP_ALL	GO:0042445	hormone metabolic process	6	2.0905923344947737	0.00824597264371332	ENSMUSG00000038541, ENSMUSG00000063428, ENSMUSG00000019768, ENSMUSG00000037542, ENSMUSG00000021214, ENSMUSG00000034785	198	90	14219	4.7875420875420875	0.9999823781306588	0.3057193427986351	12.669918172873384
GOTERM_BP_ALL	GO:0044106	cellular amine metabolic process	10	3.484320557491289	0.009456242315825349	ENSMUSG00000074768, ENSMUSG00000015970, ENSMUSG00000063428, ENSMUSG00000000326, ENSMUSG00000002769, ENSMUSG00000026272, ENSMUSG00000037686, ENSMUSG00000029445, ENSMUSG00000044005, ENSMUSG00000022587	198	256	14219	2.805200441919192	0.9999964925966728	0.3331444084126405	14.397335409636636
GOTERM_BP_ALL	GO:0065008	regulation of biological quality	26	9.059233449477352	0.01238794883839535	ENSMUSG00000059434, ENSMUSG00000063428, ENSMUSG00000000326, ENSMUSG00000020125, ENSMUSG00000037542, ENSMUSG00000031285, ENSMUSG00000031640, ENSMUSG00000034785, ENSMUSG00000040658, ENSMUSG00000030470, ENSMUSG00000037780, ENSMUSG00000019906, ENSMUSG00000020123, ENSMUSG00000021214, ENSMUSG00000031906, ENSMUSG00000024411, ENSMUSG00000000811, ENSMUSG00000019768, ENSMUSG00000022587, ENSMUSG00000050541,…	198	1123	14219	1.6626370562256585	0.9999999303060182	0.40248356893742765	18.449717550327293
GOTERM_BP_ALL	GO:0046164	alcohol catabolic process	5	1.7421602787456445	0.012538642813204834	ENSMUSG00000020277, ENSMUSG00000000326, ENSMUSG00000022613, ENSMUSG00000037797, ENSMUSG00000025815	198	65	14219	5.524087024087024	0.9999999430381188	0.39678483369643214	18.653068976877265
GOTERM_BP_ALL	GO:0051186	cofactor metabolic process	8	2.7874564459930316	0.013520128200267939	ENSMUSG00000001663, ENSMUSG00000001665, ENSMUSG00000017453, ENSMUSG00000000673, ENSMUSG00000000811, ENSMUSG00000040471, ENSMUSG00000037797, ENSMUSG00000022574	198	182	14219	3.156621156621157	0.9999999847018886	0.4109713671715882	19.965914621589363
GOTERM_BP_ALL	GO:0006732	coenzyme metabolic process	7	2.4390243902439024	0.014648413887350931	ENSMUSG00000001663, ENSMUSG00000001665, ENSMUSG00000017453, ENSMUSG00000000673, ENSMUSG00000000811, ENSMUSG00000040471, ENSMUSG00000022574	198	143	14219	3.515328106237197	0.9999999966302875	0.4272946710776413	21.45053673697629
GOTERM_BP_ALL	GO:0006518	peptide metabolic process	4	1.3937282229965158	0.015479115408398286	ENSMUSG00000001663, ENSMUSG00000001665, ENSMUSG00000000811, ENSMUSG00000040471	198	38	14219	7.559276980329613	0.9999999988950014	0.4360968860606328	22.527022383178362
GOTERM_BP_ALL	GO:0030193	regulation of blood coagulation	3	1.0452961672473868	0.01557672183882613	ENSMUSG00000016942, ENSMUSG00000031640, ENSMUSG00000059481	198	14	14219	15.38852813852814	0.9999999990307443	0.42932318914250445	22.652594790136472
GOTERM_BP_ALL	GO:0009605	response to external stimulus	17	5.923344947735192	0.01645104976580115	ENSMUSG00000022615, ENSMUSG00000062545, ENSMUSG00000037035, ENSMUSG00000031640, ENSMUSG00000039196, ENSMUSG00000020538, ENSMUSG00000074115, ENSMUSG00000035875, ENSMUSG00000037780, ENSMUSG00000025494, ENSMUSG00000035031, ENSMUSG00000020123, ENSMUSG00000021091, ENSMUSG00000022425, ENSMUSG00000059481, ENSMUSG00000040505, ENSMUSG00000037942	198	640	14219	1.9075363005050505	0.9999999997005775	0.4384661934993963	23.768941839465786
GOTERM_BP_ALL	GO:0045087	innate immune response	6	2.0905923344947737	0.016545247141844716	ENSMUSG00000037780, ENSMUSG00000062545, ENSMUSG00000025494, ENSMUSG00000028076, ENSMUSG00000035031, ENSMUSG00000032080	198	107	14219	4.02690455961484	0.9999999997361877	0.43194265399473375	23.888306696102678
GOTERM_BP_ALL	GO:0005996	monosaccharide metabolic process	8	2.7874564459930316	0.01718665117431379	ENSMUSG00000020277, ENSMUSG00000025175, ENSMUSG00000046794, ENSMUSG00000067279, ENSMUSG00000002769, ENSMUSG00000016756, ENSMUSG00000025317, ENSMUSG00000025815	198	191	14219	3.0078798455761806	0.9999999998886414	0.4361441528199844	24.696426327377186
GOTERM_BP_ALL	GO:0060749	mammary gland alveolus development	3	1.0452961672473868	0.017810991587325197	ENSMUSG00000070348, ENSMUSG00000005268, ENSMUSG00000019768	198	15	14219	14.362626262626263	0.9999999999519291	0.4398058258344094	25.475304231955576
GOTERM_BP_ALL	GO:0008610	lipid biosynthetic process	10	3.484320557491289	0.01796712417222136	ENSMUSG00000021210, ENSMUSG00000038541, ENSMUSG00000024665, ENSMUSG00000038641, ENSMUSG00000028518, ENSMUSG00000010663, ENSMUSG00000026189, ENSMUSG00000037071, ENSMUSG00000037542, ENSMUSG00000026623	198	285	14219	2.519758993443204	0.999999999961041	0.43485833410920693	25.66889723814053
GOTERM_BP_ALL	GO:0006950	response to stress	26	9.059233449477352	0.02244932441209614	ENSMUSG00000020125, ENSMUSG00000036216, ENSMUSG00000070348, ENSMUSG00000062545, ENSMUSG00000079507, ENSMUSG00000028076, ENSMUSG00000031640, ENSMUSG00000022574, ENSMUSG00000039196, ENSMUSG00000020538, ENSMUSG00000074115, ENSMUSG00000035875, ENSMUSG00000028518, ENSMUSG00000037780, ENSMUSG00000020123, ENSMUSG00000032080, ENSMUSG00000021091, ENSMUSG00000031906, ENSMUSG00000052435, ENSMUSG00000018449,…	198	1184	14219	1.576977545727546	0.999999999999908	0.5024460301419051	31.029310950662726
GOTERM_BP_ALL	GO:0009611	response to wounding	11	3.8327526132404177	0.022791678273884994	ENSMUSG00000074115, ENSMUSG00000035875, ENSMUSG00000037780, ENSMUSG00000062545, ENSMUSG00000025494, ENSMUSG00000035031, ENSMUSG00000031640, ENSMUSG00000021091, ENSMUSG00000059481, ENSMUSG00000039196, ENSMUSG00000037942	198	347	14219	2.276496958053154	0.999999999999942	0.499781705181219	31.423453968323912
GOTERM_BP_ALL	GO:0005975	carbohydrate metabolic process	13	4.529616724738676	0.024441571192305882	ENSMUSG00000068587, ENSMUSG00000046794, ENSMUSG00000029162, ENSMUSG00000002769, ENSMUSG00000046312, ENSMUSG00000022613, ENSMUSG00000013846, ENSMUSG00000025815, ENSMUSG00000020277, ENSMUSG00000025175, ENSMUSG00000067279, ENSMUSG00000016756, ENSMUSG00000025317	198	454	14219	2.056323143327549	0.9999999999999938	0.5166236348478788	33.29345774023462
GOTERM_BP_ALL	GO:0006633	fatty acid biosynthetic process	5	1.7421602787456445	0.026009987326803152	ENSMUSG00000024665, ENSMUSG00000028518, ENSMUSG00000010663, ENSMUSG00000026189, ENSMUSG00000037071	198	81	14219	4.432909340316748	0.9999999999999992	0.5311149488008347	35.02663484058613
GOTERM_BP_ALL	GO:0055090	acylglycerol homeostasis	2	0.6968641114982579	0.027518411106911604	ENSMUSG00000032079, ENSMUSG00000028553	198	2	14219	71.81313131313132	0.9999999999999999	0.5438246578874723	36.6535576907559
GOTERM_BP_ALL	GO:0015718	monocarboxylic acid transport	3	1.0452961672473868	0.027976717871124244	ENSMUSG00000023073, ENSMUSG00000030382, ENSMUSG00000021135	198	19	14219	11.338915470494419	1.0	0.5422852788148153	37.140241531434526
GOTERM_BP_ALL	GO:0006091	generation of precursor metabolites and energy	9	3.1358885017421603	0.029213445225435498	ENSMUSG00000020277, ENSMUSG00000024665, ENSMUSG00000046794, ENSMUSG00000067279, ENSMUSG00000002769, ENSMUSG00000016756, ENSMUSG00000000811, ENSMUSG00000010663, ENSMUSG00000025815	198	261	14219	2.476314872866597	1.0	0.5506299683228132	38.436083967286535
GOTERM_BP_ALL	GO:0006814	sodium ion transport	6	2.0905923344947737	0.02998496850547648	ENSMUSG00000029843, ENSMUSG00000018459, ENSMUSG00000023073, ENSMUSG00000038522, ENSMUSG00000021135, ENSMUSG00000046480	198	125	14219	3.4470303030303033	1.0	0.5528815473012103	39.23173687443712
GOTERM_BP_ALL	GO:0050818	regulation of coagulation	3	1.0452961672473868	0.03080641055586008	ENSMUSG00000016942, ENSMUSG00000031640, ENSMUSG00000059481	198	20	14219	10.771969696969698	1.0	0.5556351519716493	40.0682522462206
GOTERM_BP_ALL	GO:0034754	cellular hormone metabolic process	4	1.3937282229965158	0.03525317324822718	ENSMUSG00000038541, ENSMUSG00000019768, ENSMUSG00000037542, ENSMUSG00000021214	198	52	14219	5.524087024087025	1.0	0.598450008674879	44.412092476581044
GOTERM_BP_ALL	GO:0030856	regulation of epithelial cell differentiation	3	1.0452961672473868	0.03678636619074943	ENSMUSG00000070348, ENSMUSG00000005268, ENSMUSG00000024066	198	22	14219	9.792699724517908	1.0	0.6073669166549658	45.839972693158536
GOTERM_BP_ALL	GO:0044262	cellular carbohydrate metabolic process	10	3.484320557491289	0.03861603818787335	ENSMUSG00000020277, ENSMUSG00000025175, ENSMUSG00000046794, ENSMUSG00000067279, ENSMUSG00000002769, ENSMUSG00000022613, ENSMUSG00000016756, ENSMUSG00000013846, ENSMUSG00000025317, ENSMUSG00000025815	198	327	14219	2.1961202236431596	1.0	0.6186795404852776	47.49889387152929
GOTERM_BP_ALL	GO:0010646	regulation of cell communication	18	6.2717770034843205	0.039397787729300804	ENSMUSG00000030827, ENSMUSG00000070348, ENSMUSG00000040146, ENSMUSG00000037035, ENSMUSG00000045094, ENSMUSG00000050541, ENSMUSG00000020277, ENSMUSG00000040998, ENSMUSG00000029032, ENSMUSG00000070368, ENSMUSG00000006538, ENSMUSG00000051517, ENSMUSG00000025494, ENSMUSG00000038167, ENSMUSG00000055254, ENSMUSG00000040964, ENSMUSG00000074272, ENSMUSG00000024427	198	771	14219	1.6765711590614314	1.0	0.6194504604088039	48.193038607626214
GOTERM_BP_ALL	GO:0044419	interspecies interaction between organisms	3	1.0452961672473868	0.03992969709964155	ENSMUSG00000020125, ENSMUSG00000037780, ENSMUSG00000074272	198	23	14219	9.366930171277996	1.0	0.6178575816424401	48.6604047412651
GOTERM_BP_ALL	GO:0051239	regulation of multicellular organismal process	18	6.2717770034843205	0.04230529570817142	ENSMUSG00000070348, ENSMUSG00000079507, ENSMUSG00000028076, ENSMUSG00000037035, ENSMUSG00000019768, ENSMUSG00000031640, ENSMUSG00000050541, ENSMUSG00000030470, ENSMUSG00000070368, ENSMUSG00000006538, ENSMUSG00000025494, ENSMUSG00000005268, ENSMUSG00000055254, ENSMUSG00000016942, ENSMUSG00000032080, ENSMUSG00000028553, ENSMUSG00000059481, ENSMUSG00000024066	198	778	14219	1.6614863285814443	1.0	0.6330557105409342	50.69983645696177
GOTERM_BP_ALL	GO:0009308	amine metabolic process	10	3.484320557491289	0.04421729781616949	ENSMUSG00000074768, ENSMUSG00000015970, ENSMUSG00000063428, ENSMUSG00000000326, ENSMUSG00000002769, ENSMUSG00000026272, ENSMUSG00000037686, ENSMUSG00000029445, ENSMUSG00000044005, ENSMUSG00000022587	198	336	14219	2.137295574795575	1.0	0.643282474109832	52.285765748360966
GOTERM_BP_ALL	GO:0006006	glucose metabolic process	6	2.0905923344947737	0.04529959080487256	ENSMUSG00000020277, ENSMUSG00000046794, ENSMUSG00000067279, ENSMUSG00000002769, ENSMUSG00000025317, ENSMUSG00000025815	198	140	14219	3.077705627705628	1.0	0.6460949654007588	53.162123888530964
GOTERM_BP_ALL	GO:0019216	regulation of lipid metabolic process	4	1.3937282229965158	0.04637448965564672	ENSMUSG00000020538, ENSMUSG00000003585, ENSMUSG00000028553, ENSMUSG00000066513	198	58	14219	4.952629745733194	1.0	0.6487425676068255	54.017519815579504
GOTERM_BP_ALL	GO:0046942	carboxylic acid transport	5	1.7421602787456445	0.04871842019398118	ENSMUSG00000026272, ENSMUSG00000018459, ENSMUSG00000023073, ENSMUSG00000030382, ENSMUSG00000021135	198	99	14219	3.6269258238955207	1.0	0.6612247330417158	55.832202539035514
GOTERM_BP_ALL	GO:0006520	cellular amino acid metabolic process	7	2.4390243902439024	0.05011679284994763	ENSMUSG00000074768, ENSMUSG00000063428, ENSMUSG00000002769, ENSMUSG00000026272, ENSMUSG00000037686, ENSMUSG00000029445, ENSMUSG00000044005	198	191	14219	2.631894864879158	1.0	0.6659040199879156	56.8825769533061
GOTERM_BP_ALL	GO:0048589	developmental growth	5	1.7421602787456445	0.05022114230183358	ENSMUSG00000027454, ENSMUSG00000005268, ENSMUSG00000019768, ENSMUSG00000031285, ENSMUSG00000059481	198	100	14219	3.5906565656565657	1.0	0.6608220168444723	56.96001020573165
GOTERM_BP_ALL	GO:0015849	organic acid transport	5	1.7421602787456445	0.05022114230183358	ENSMUSG00000026272, ENSMUSG00000018459, ENSMUSG00000023073, ENSMUSG00000030382, ENSMUSG00000021135	198	100	14219	3.5906565656565657	1.0	0.6608220168444723	56.96001020573165
GOTERM_BP_ALL	GO:0009056	catabolic process	22	7.665505226480835	0.052356279370683524	ENSMUSG00000000326, ENSMUSG00000020003, ENSMUSG00000038641, ENSMUSG00000018868, ENSMUSG00000022613, ENSMUSG00000037686, ENSMUSG00000053846, ENSMUSG00000029445, ENSMUSG00000046971, ENSMUSG00000034413, ENSMUSG00000033308, ENSMUSG00000025815, ENSMUSG00000028167, ENSMUSG00000038541, ENSMUSG00000020277, ENSMUSG00000040658, ENSMUSG00000026730, ENSMUSG00000037797, ENSMUSG00000022425, ENSMUSG00000059481,…	198	1040	14219	1.5191239316239316	1.0	0.6707125920231045	58.51602534176232
GOTERM_BP_ALL	GO:0015721	bile acid and bile salt transport	2	0.6968641114982579	0.05428329779820649	ENSMUSG00000023073, ENSMUSG00000021135	198	4	14219	35.90656565656566	1.0	0.6786211936125126	59.87487778815449
GOTERM_BP_ALL	GO:0045542	positive regulation of cholesterol biosynthetic process	2	0.6968641114982579	0.05428329779820649	ENSMUSG00000020538, ENSMUSG00000003585	198	4	14219	35.90656565656566	1.0	0.6786211936125126	59.87487778815449
GOTERM_BP_ALL	GO:0010893	positive regulation of steroid biosynthetic process	2	0.6968641114982579	0.05428329779820649	ENSMUSG00000020538, ENSMUSG00000003585	198	4	14219	35.90656565656566	1.0	0.6786211936125126	59.87487778815449
GOTERM_BP_ALL	GO:0009110	vitamin biosynthetic process	3	1.0452961672473868	0.0607298068933061	ENSMUSG00000000673, ENSMUSG00000037542, ENSMUSG00000022574	198	29	14219	7.428944618599791	1.0	0.7149071778240352	64.12313801816019
GOTERM_BP_ALL	GO:0051704	multi-organism process	10	3.484320557491289	0.06159048014454728	ENSMUSG00000063428, ENSMUSG00000020125, ENSMUSG00000036216, ENSMUSG00000037780, ENSMUSG00000079507, ENSMUSG00000020123, ENSMUSG00000019768, ENSMUSG00000074272, ENSMUSG00000021214, ENSMUSG00000052435	198	358	14219	2.0059533886349525	1.0	0.7147241132958918	64.65724647111404
GOTERM_BP_ALL	GO:0006810	transport	42	14.634146341463413	0.06282247337504637	ENSMUSG00000059434, ENSMUSG00000020003, ENSMUSG00000033114, ENSMUSG00000026272, ENSMUSG00000020125, ENSMUSG00000039196, ENSMUSG00000024485, ENSMUSG00000026304, ENSMUSG00000026435, ENSMUSG00000067279, ENSMUSG00000025466, ENSMUSG00000018459, ENSMUSG00000010663, ENSMUSG00000040966, ENSMUSG00000019906, ENSMUSG00000032080, ENSMUSG00000026614, ENSMUSG00000046480, ENSMUSG00000031906, ENSMUSG00000024411,…	198	2342	14219	1.287852909970758	1.0	0.7167408685693623	65.40880641700508
GOTERM_BP_ALL	GO:0051873	killing by host of symbiont cells	2	0.6968641114982579	0.06738960735437015	ENSMUSG00000020125, ENSMUSG00000037780	198	5	14219	28.72525252525253	1.0	0.7372913519272319	68.06603082413719
[truncated: 24 more rows]
